# Supplementary material for: Microscopic structural study on the growth history of granular heaps prepared by the raining method
Source: Royal Society of Chemistry journal article supplement (doi:10.1039/d5sm00506j), 2025-01-01
Supplement: d5sm00506j1.xlsx [file d5sm00506j1.xlsx]

## Sheet: fig1.b
0.637	0.636	0.636	0.635	0.635	0.635	0.636	0.636	0.636	0.636	0.636	0.636	0.636	0.636	0.636	0.636	0.637	0.637	0.637	0.637	0.637	0.638	0.638	0.638	0.638	0.638	0.639	0.639	0.639	0.639	0.64	0.64	0.64	0.64	0.64	0.64	0.641	0.641	0.641	0.641	0.641	0.641	0.642	0.642	0.642	0.642	0.642	0.642	0.642	0.642
0.638	0.637	0.637	0.636	0.636	0.636	0.636	0.636	0.636	0.636	0.636	0.636	0.636	0.636	0.636	0.637	0.637	0.637	0.637	0.637	0.638	0.638	0.638	0.638	0.638	0.638	0.639	0.639	0.639	0.639	0.64	0.64	0.64	0.64	0.64	0.64	0.641	0.641	0.641	0.641	0.641	0.641	0.642	0.642	0.642	0.642	0.642	0.642	0.642	0.642
0.639	0.638	0.638	0.637	0.637	0.637	0.637	0.637	0.637	0.637	0.637	0.637	0.637	0.637	0.637	0.637	0.637	0.637	0.637	0.637	0.638	0.638	0.638	0.638	0.638	0.638	0.639	0.639	0.639	0.639	0.64	0.64	0.64	0.64	0.64	0.64	0.641	0.641	0.641	0.641	0.641	0.641	0.642	0.642	0.642	0.642	0.642	0.642	0.642	0.642
0.641	0.64	0.639	0.638	0.638	0.637	0.637	0.637	0.637	0.637	0.637	0.637	0.637	0.637	0.637	0.637	0.637	0.637	0.638	0.638	0.638	0.638	0.638	0.638	0.638	0.638	0.639	0.639	0.639	0.639	0.64	0.64	0.64	0.64	0.64	0.64	0.641	0.641	0.641	0.641	0.641	0.641	0.641	0.642	0.642	0.641	0.641	0.641	0.641	0.641
0.642	0.641	0.64	0.639	0.639	0.638	0.638	0.638	0.638	0.638	0.638	0.637	0.637	0.637	0.637	0.637	0.638	0.638	0.638	0.638	0.638	0.638	0.638	0.638	0.638	0.638	0.639	0.639	0.639	0.639	0.64	0.64	0.64	0.64	0.64	0.64	0.641	0.641	0.641	0.641	0.641	0.641	0.641	0.641	0.641	0.641	0.641	0.641	0.641	0.641
0.643	0.642	0.641	0.64	0.64	0.639	0.639	0.638	0.638	0.638	0.638	0.638	0.638	0.638	0.638	0.638	0.638	0.638	0.638	0.638	0.638	0.638	0.638	0.638	0.638	0.638	0.639	0.639	0.639	0.639	0.64	0.64	0.64	0.64	0.64	0.64	0.64	0.641	0.641	0.641	0.641	0.641	0.641	0.641	0.641	0.641	0.641	0.641	0.641	0.641
0.644	0.643	0.642	0.641	0.64	0.64	0.639	0.639	0.639	0.639	0.638	0.638	0.638	0.638	0.638	0.638	0.638	0.638	0.638	0.638	0.638	0.638	0.638	0.638	0.638	0.639	0.639	0.639	0.639	0.639	0.64	0.64	0.64	0.64	0.64	0.64	0.64	0.64	0.641	0.641	0.641	0.641	0.641	0.641	0.641	0.641	0.641	0.64	0.64	0.64
0.644	0.644	0.643	0.642	0.641	0.64	0.64	0.639	0.639	0.639	0.639	0.638	0.638	0.638	0.638	0.638	0.638	0.638	0.638	0.638	0.638	0.638	0.638	0.639	0.639	0.639	0.639	0.639	0.639	0.639	0.64	0.64	0.64	0.64	0.64	0.64	0.64	0.64	0.64	0.641	0.641	0.641	0.641	0.64	0.64	0.64	0.64	0.64	0.64	0.64
0.645	0.644	0.643	0.642	0.641	0.641	0.64	0.64	0.639	0.639	0.639	0.639	0.639	0.639	0.638	0.638	0.639	0.639	0.639	0.639	0.639	0.639	0.639	0.639	0.639	0.639	0.639	0.639	0.639	0.639	0.64	0.64	0.64	0.64	0.64	0.64	0.64	0.64	0.64	0.64	0.64	0.64	0.64	0.64	0.64	0.64	0.64	0.64	0.64	0.64
0.645	0.644	0.643	0.642	0.642	0.641	0.64	0.64	0.64	0.639	0.639	0.639	0.639	0.639	0.639	0.639	0.639	0.639	0.639	0.639	0.639	0.639	0.639	0.639	0.639	0.639	0.639	0.639	0.639	0.639	0.64	0.64	0.64	0.64	0.64	0.64	0.64	0.64	0.64	0.64	0.64	0.64	0.64	0.64	0.64	0.64	0.64	0.639	0.639	0.639
0.645	0.644	0.643	0.642	0.642	0.641	0.64	0.64	0.64	0.639	0.639	0.639	0.639	0.639	0.639	0.639	0.639	0.639	0.639	0.639	0.639	0.639	0.639	0.639	0.639	0.639	0.639	0.639	0.639	0.639	0.64	0.64	0.64	0.64	0.64	0.64	0.64	0.64	0.64	0.64	0.64	0.64	0.64	0.64	0.639	0.639	0.639	0.639	0.639	0.639
0.644	0.644	0.643	0.642	0.642	0.641	0.64	0.64	0.64	0.639	0.639	0.639	0.639	0.639	0.639	0.639	0.639	0.639	0.639	0.639	0.639	0.639	0.639	0.639	0.639	0.639	0.639	0.639	0.64	0.64	0.64	0.64	0.64	0.64	0.64	0.64	0.64	0.64	0.64	0.64	0.64	0.64	0.64	0.639	0.639	0.639	0.639	0.639	0.639	0.639
0.644	0.643	0.643	0.642	0.641	0.641	0.64	0.64	0.64	0.639	0.639	0.639	0.639	0.639	0.639	0.639	0.639	0.639	0.639	0.639	0.639	0.639	0.639	0.639	0.639	0.639	0.639	0.64	0.64	0.64	0.64	0.64	0.64	0.64	0.64	0.64	0.64	0.64	0.64	0.64	0.64	0.639	0.639	0.639	0.639	0.639	0.639	0.639	0.638	0.638
0.643	0.643	0.642	0.642	0.641	0.64	0.64	0.64	0.639	0.639	0.639	0.639	0.639	0.639	0.639	0.639	0.639	0.639	0.639	0.639	0.639	0.639	0.639	0.639	0.639	0.639	0.64	0.64	0.64	0.64	0.64	0.64	0.64	0.64	0.64	0.64	0.64	0.64	0.64	0.64	0.639	0.639	0.639	0.639	0.639	0.638	0.638	0.638	0.638	0.638
0.643	0.642	0.642	0.641	0.641	0.64	0.64	0.64	0.639	0.639	0.639	0.639	0.639	0.639	0.639	0.639	0.639	0.639	0.639	0.639	0.639	0.639	0.639	0.639	0.639	0.64	0.64	0.64	0.64	0.64	0.64	0.64	0.64	0.64	0.64	0.64	0.64	0.64	0.64	0.639	0.639	0.639	0.639	0.639	0.638	0.638	0.638	0.638	0.638	0.638
0.642	0.642	0.641	0.641	0.64	0.64	0.64	0.639	0.639	0.639	0.639	0.639	0.639	0.639	0.639	0.639	0.639	0.639	0.639	0.639	0.639	0.639	0.639	0.639	0.64	0.64	0.64	0.64	0.64	0.64	0.64	0.64	0.64	0.64	0.64	0.64	0.64	0.639	0.639	0.639	0.639	0.639	0.639	0.638	0.638	0.638	0.638	0.638	0.637	0.637
0.641	0.641	0.641	0.64	0.64	0.639	0.639	0.639	0.639	0.639	0.639	0.639	0.639	0.639	0.639	0.639	0.639	0.639	0.639	0.639	0.639	0.639	0.639	0.639	0.64	0.64	0.64	0.64	0.64	0.64	0.64	0.64	0.64	0.64	0.64	0.64	0.639	0.639	0.639	0.639	0.639	0.639	0.638	0.638	0.638	0.638	0.637	0.637	0.637	0.637
0.64	0.64	0.64	0.64	0.639	0.639	0.639	0.639	0.639	0.639	0.639	0.639	0.639	0.639	0.639	0.639	0.639	0.639	0.639	0.639	0.639	0.639	0.639	0.639	0.64	0.64	0.64	0.64	0.64	0.64	0.64	0.64	0.64	0.639	0.639	0.639	0.639	0.639	0.639	0.639	0.639	0.638	0.638	0.638	0.637	0.637	0.637	0.637	0.637	0.637
0.64	0.64	0.639	0.639	0.639	0.639	0.639	0.639	0.639	0.639	0.639	0.639	0.639	0.639	0.639	0.639	0.639	0.639	0.639	0.639	0.639	0.639	0.639	0.639	0.639	0.639	0.639	0.639	0.639	0.639	0.639	0.639	0.639	0.639	0.639	0.639	0.639	0.639	0.639	0.638	0.638	0.638	0.638	0.637	0.637	0.637	0.637	0.636	0.636	0.636
0.639	0.639	0.639	0.639	0.639	0.639	0.639	0.639	0.639	0.639	0.639	0.639	0.639	0.639	0.639	0.639	0.639	0.639	0.639	0.639	0.639	0.639	0.639	0.639	0.639	0.639	0.639	0.639	0.639	0.639	0.639	0.639	0.639	0.639	0.639	0.639	0.639	0.639	0.638	0.638	0.638	0.638	0.637	0.637	0.637	0.636	0.636	0.636	0.636	0.636
0.638	0.638	0.639	0.638	0.638	0.638	0.638	0.638	0.639	0.639	0.639	0.639	0.639	0.639	0.639	0.639	0.639	0.639	0.639	0.639	0.639	0.639	0.639	0.639	0.639	0.639	0.639	0.639	0.639	0.639	0.639	0.639	0.639	0.639	0.639	0.639	0.638	0.638	0.638	0.638	0.637	0.637	0.637	0.637	0.636	0.636	0.636	0.636	0.635	0.635
0.638	0.638	0.638	0.638	0.638	0.638	0.638	0.638	0.638	0.639	0.639	0.639	0.639	0.639	0.639	0.639	0.639	0.639	0.639	0.639	0.639	0.639	0.639	0.639	0.639	0.639	0.639	0.639	0.639	0.639	0.639	0.639	0.638	0.638	0.638	0.638	0.638	0.638	0.638	0.637	0.637	0.637	0.636	0.636	0.636	0.636	0.635	0.635	0.635	0.635
0.638	0.638	0.638	0.638	0.638	0.638	0.638	0.638	0.638	0.639	0.639	0.639	0.639	0.639	0.639	0.639	0.639	0.639	0.639	0.639	0.639	0.639	0.639	0.639	0.639	0.639	0.639	0.639	0.638	0.638	0.638	0.638	0.638	0.638	0.638	0.638	0.638	0.637	0.637	0.637	0.637	0.636	0.636	0.636	0.635	0.635	0.635	0.635	0.635	0.635
0.637	0.637	0.637	0.638	0.638	0.638	0.638	0.638	0.638	0.638	0.638	0.639	0.639	0.639	0.639	0.639	0.639	0.639	0.639	0.639	0.639	0.639	0.639	0.639	0.639	0.638	0.638	0.638	0.638	0.638	0.638	0.638	0.638	0.638	0.637	0.637	0.637	0.637	0.637	0.636	0.636	0.636	0.635	0.635	0.635	0.635	0.635	0.634	0.634	0.634
0.637	0.637	0.637	0.637	0.637	0.637	0.638	0.638	0.638	0.638	0.638	0.638	0.639	0.639	0.639	0.639	0.639	0.639	0.639	0.639	0.639	0.639	0.638	0.638	0.638	0.638	0.638	0.638	0.638	0.638	0.638	0.637	0.637	0.637	0.637	0.637	0.637	0.636	0.636	0.636	0.636	0.635	0.635	0.635	0.634	0.634	0.634	0.634	0.634	0.634
0.636	0.636	0.637	0.637	0.637	0.637	0.637	0.638	0.638	0.638	0.638	0.638	0.638	0.638	0.638	0.639	0.639	0.639	0.639	0.638	0.638	0.638	0.638	0.638	0.638	0.638	0.638	0.638	0.637	0.637	0.637	0.637	0.637	0.637	0.637	0.636	0.636	0.636	0.636	0.635	0.635	0.635	0.635	0.634	0.634	0.634	0.634	0.634	0.633	0.633
0.636	0.636	0.636	0.636	0.637	0.637	0.637	0.637	0.638	0.638	0.638	0.638	0.638	0.638	0.638	0.638	0.638	0.638	0.638	0.638	0.638	0.638	0.638	0.638	0.638	0.638	0.637	0.637	0.637	0.637	0.637	0.637	0.637	0.636	0.636	0.636	0.636	0.636	0.635	0.635	0.635	0.634	0.634	0.634	0.634	0.633	0.633	0.633	0.633	0.633
0.635	0.636	0.636	0.636	0.636	0.637	0.637	0.637	0.637	0.638	0.638	0.638	0.638	0.638	0.638	0.638	0.638	0.638	0.638	0.638	0.638	0.638	0.638	0.638	0.637	0.637	0.637	0.637	0.637	0.637	0.636	0.636	0.636	0.636	0.636	0.636	0.635	0.635	0.635	0.634	0.634	0.634	0.634	0.633	0.633	0.633	0.633	0.633	0.633	0.632
0.635	0.635	0.635	0.636	0.636	0.636	0.637	0.637	0.637	0.637	0.638	0.638	0.638	0.638	0.638	0.638	0.638	0.638	0.638	0.638	0.638	0.638	0.638	0.637	0.637	0.637	0.637	0.637	0.637	0.636	0.636	0.636	0.636	0.636	0.635	0.635	0.635	0.635	0.634	0.634	0.634	0.633	0.633	0.633	0.633	0.632	0.632	0.632	0.632	0.632
0.635	0.635	0.635	0.635	0.636	0.636	0.636	0.637	0.637	0.637	0.637	0.638	0.638	0.638	0.638	0.638	0.638	0.638	0.638	0.638	0.638	0.638	0.637	0.637	0.637	0.637	0.637	0.636	0.636	0.636	0.636	0.636	0.635	0.635	0.635	0.635	0.634	0.634	0.634	0.633	0.633	0.633	0.633	0.632	0.632	0.632	0.632	0.632	0.632	0.631
0.635	0.635	0.635	0.635	0.636	0.636	0.636	0.637	0.637	0.637	0.637	0.638	0.638	0.638	0.638	0.638	0.638	0.638	0.638	0.638	0.638	0.637	0.637	0.637	0.637	0.637	0.636	0.636	0.636	0.636	0.635	0.635	0.635	0.635	0.634	0.634	0.634	0.634	0.633	0.633	0.633	0.632	0.632	0.632	0.632	0.631	0.631	0.631	0.631	0.631
0.635	0.635	0.635	0.635	0.635	0.636	0.636	0.636	0.637	0.637	0.637	0.637	0.638	0.638	0.638	0.638	0.638	0.638	0.638	0.638	0.637	0.637	0.637	0.637	0.637	0.636	0.636	0.636	0.636	0.635	0.635	0.635	0.635	0.634	0.634	0.634	0.633	0.633	0.633	0.632	0.632	0.632	0.631	0.631	0.631	0.631	0.631	0.631	0.63	0.63
0.635	0.635	0.635	0.635	0.635	0.636	0.636	0.636	0.637	0.637	0.637	0.637	0.638	0.638	0.638	0.638	0.638	0.638	0.638	0.637	0.637	0.637	0.637	0.637	0.637	0.636	0.636	0.636	0.635	0.635	0.635	0.635	0.634	0.634	0.634	0.633	0.633	0.632	0.632	0.632	0.631	0.631	0.631	0.631	0.63	0.63	0.63	0.63	0.63	0.63
0.635	0.635	0.635	0.635	0.635	0.636	0.636	0.636	0.637	0.637	0.637	0.637	0.638	0.638	0.638	0.638	0.638	0.638	0.638	0.637	0.637	0.637	0.637	0.637	0.636	0.636	0.636	0.636	0.635	0.635	0.635	0.634	0.634	0.634	0.633	0.633	0.632	0.632	0.632	0.631	0.631	0.63	0.63	0.63	0.63	0.63	0.629	0.629	0.629	0.629
0.635	0.635	0.635	0.635	0.635	0.636	0.636	0.636	0.637	0.637	0.637	0.637	0.638	0.638	0.638	0.638	0.638	0.638	0.638	0.637	0.637	0.637	0.637	0.637	0.636	0.636	0.636	0.635	0.635	0.635	0.634	0.634	0.634	0.633	0.633	0.632	0.632	0.631	0.631	0.631	0.63	0.63	0.63	0.629	0.629	0.629	0.629	0.629	0.629	0.629
0.635	0.635	0.635	0.635	0.636	0.636	0.636	0.637	0.637	0.637	0.637	0.638	0.638	0.638	0.638	0.638	0.638	0.638	0.637	0.637	0.637	0.637	0.637	0.637	0.636	0.636	0.636	0.635	0.635	0.634	0.634	0.634	0.633	0.633	0.632	0.632	0.631	0.631	0.631	0.63	0.63	0.629	0.629	0.629	0.629	0.628	0.628	0.628	0.628	0.628
0.635	0.635	0.635	0.636	0.636	0.636	0.636	0.637	0.637	0.637	0.637	0.638	0.638	0.638	0.638	0.638	0.638	0.638	0.637	0.637	0.637	0.637	0.637	0.636	0.636	0.636	0.635	0.635	0.634	0.634	0.634	0.633	0.633	0.632	0.632	0.632	0.631	0.631	0.63	0.63	0.629	0.629	0.629	0.628	0.628	0.628	0.628	0.628	0.628	0.628
0.635	0.636	0.636	0.636	0.636	0.636	0.637	0.637	0.637	0.637	0.638	0.638	0.638	0.638	0.638	0.638	0.638	0.638	0.637	0.637	0.637	0.637	0.637	0.636	0.636	0.636	0.635	0.635	0.634	0.634	0.633	0.633	0.633	0.632	0.632	0.631	0.631	0.63	0.63	0.629	0.629	0.628	0.628	0.628	0.628	0.627	0.627	0.627	0.627	0.627
0.636	0.636	0.636	0.636	0.636	0.636	0.637	0.637	0.637	0.637	0.638	0.638	0.638	0.638	0.638	0.638	0.638	0.638	0.637	0.637	0.637	0.637	0.636	0.636	0.636	0.635	0.635	0.635	0.634	0.634	0.633	0.633	0.632	0.632	0.631	0.631	0.63	0.63	0.629	0.629	0.628	0.628	0.628	0.627	0.627	0.627	0.627	0.627	0.627	0.627
0.636	0.636	0.636	0.636	0.636	0.637	0.637	0.637	0.637	0.638	0.638	0.638	0.638	0.638	0.638	0.638	0.638	0.638	0.637	0.637	0.637	0.637	0.636	0.636	0.636	0.635	0.635	0.634	0.634	0.633	0.633	0.632	0.632	0.631	0.631	0.63	0.63	0.629	0.629	0.628	0.628	0.628	0.627	0.627	0.627	0.627	0.627	0.627	0.626	0.626
0.636	0.636	0.636	0.636	0.636	0.637	0.637	0.637	0.637	0.638	0.638	0.638	0.638	0.638	0.638	0.638	0.638	0.637	0.637	0.637	0.637	0.637	0.636	0.636	0.636	0.635	0.635	0.634	0.634	0.633	0.633	0.632	0.632	0.631	0.631	0.63	0.63	0.629	0.629	0.628	0.628	0.627	0.627	0.627	0.626	0.626	0.626	0.626	0.626	0.626
0.636	0.636	0.636	0.636	0.636	0.637	0.637	0.637	0.637	0.638	0.638	0.638	0.638	0.638	0.638	0.638	0.638	0.637	0.637	0.637	0.637	0.636	0.636	0.636	0.635	0.635	0.634	0.634	0.633	0.633	0.632	0.632	0.631	0.631	0.63	0.63	0.629	0.629	0.628	0.628	0.627	0.627	0.627	0.626	0.626	0.626	0.626	0.626	0.626	0.626
0.636	0.636	0.636	0.636	0.636	0.636	0.637	0.637	0.637	0.637	0.638	0.638	0.638	0.638	0.638	0.638	0.637	0.637	0.637	0.637	0.637	0.636	0.636	0.636	0.635	0.635	0.634	0.634	0.633	0.633	0.632	0.632	0.631	0.631	0.63	0.63	0.629	0.629	0.628	0.628	0.627	0.627	0.626	0.626	0.626	0.626	0.626	0.625	0.625	0.625
0.635	0.636	0.636	0.636	0.636	0.636	0.637	0.637	0.637	0.637	0.637	0.638	0.638	0.638	0.638	0.637	0.637	0.637	0.637	0.637	0.636	0.636	0.636	0.635	0.635	0.635	0.634	0.634	0.633	0.633	0.632	0.631	0.631	0.63	0.63	0.629	0.629	0.628	0.628	0.627	0.627	0.626	0.626	0.626	0.625	0.625	0.625	0.625	0.625	0.625
0.635	0.635	0.636	0.636	0.636	0.636	0.636	0.637	0.637	0.637	0.637	0.637	0.637	0.637	0.637	0.637	0.637	0.637	0.637	0.637	0.636	0.636	0.636	0.635	0.635	0.634	0.634	0.633	0.633	0.632	0.632	0.631	0.631	0.63	0.63	0.629	0.628	0.628	0.627	0.627	0.626	0.626	0.626	0.625	0.625	0.625	0.625	0.625	0.625	0.625
0.635	0.635	0.636	0.636	0.636	0.636	0.636	0.637	0.637	0.637	0.637	0.637	0.637	0.637	0.637	0.637	0.637	0.637	0.637	0.636	0.636	0.636	0.636	0.635	0.635	0.634	0.634	0.633	0.633	0.632	0.632	0.631	0.63	0.63	0.629	0.629	0.628	0.628	0.627	0.627	0.626	0.626	0.625	0.625	0.625	0.625	0.624	0.624	0.624	0.624
0.635	0.636	0.636	0.636	0.636	0.636	0.636	0.636	0.637	0.637	0.637	0.637	0.637	0.637	0.637	0.637	0.637	0.637	0.637	0.636	0.636	0.636	0.635	0.635	0.635	0.634	0.634	0.633	0.632	0.632	0.631	0.631	0.63	0.63	0.629	0.628	0.628	0.627	0.627	0.626	0.626	0.625	0.625	0.625	0.624	0.624	0.624	0.624	0.624	0.624
0.636	0.636	0.636	0.636	0.636	0.636	0.636	0.636	0.637	0.637	0.637	0.637	0.637	0.637	0.637	0.637	0.637	0.637	0.636	0.636	0.636	0.636	0.635	0.635	0.634	0.634	0.633	0.633	0.632	0.632	0.631	0.63	0.63	0.629	0.629	0.628	0.628	0.627	0.626	0.626	0.625	0.625	0.625	0.624	0.624	0.624	0.624	0.624	0.624	0.624
0.636	0.636	0.636	0.636	0.636	0.636	0.636	0.637	0.637	0.637	0.637	0.637	0.637	0.637	0.637	0.637	0.637	0.637	0.636	0.636	0.636	0.636	0.635	0.635	0.634	0.634	0.633	0.633	0.632	0.631	0.631	0.63	0.63	0.629	0.628	0.628	0.627	0.627	0.626	0.626	0.625	0.625	0.624	0.624	0.624	0.624	0.623	0.623	0.623	0.623
0.636	0.636	0.636	0.636	0.636	0.636	0.636	0.637	0.637	0.637	0.637	0.637	0.637	0.637	0.637	0.637	0.637	0.636	0.636	0.636	0.636	0.635	0.635	0.635	0.634	0.634	0.633	0.632	0.632	0.631	0.631	0.63	0.629	0.629	0.628	0.628	0.627	0.626	0.626	0.625	0.625	0.624	0.624	0.624	0.623	0.623	0.623	0.623	0.623	0.623
0.637	0.637	0.637	0.637	0.637	0.637	0.637	0.637	0.637	0.637	0.637	0.637	0.637	0.637	0.637	0.637	0.636	0.636	0.636	0.636	0.636	0.635	0.635	0.634	0.634	0.633	0.633	0.632	0.632	0.631	0.63	0.63	0.629	0.629	0.628	0.627	0.627	0.626	0.626	0.625	0.625	0.624	0.624	0.623	0.623	0.623	0.623	0.623	0.623	0.623
0.637	0.637	0.637	0.637	0.637	0.637	0.637	0.637	0.637	0.637	0.637	0.637	0.637	0.637	0.637	0.637	0.636	0.636	0.636	0.636	0.635	0.635	0.635	0.634	0.634	0.633	0.633	0.632	0.631	0.631	0.63	0.629	0.629	0.628	0.628	0.627	0.627	0.626	0.625	0.625	0.624	0.624	0.624	0.623	0.623	0.623	0.622	0.622	0.622	0.622
0.637	0.637	0.637	0.637	0.637	0.637	0.637	0.637	0.637	0.637	0.637	0.637	0.637	0.637	0.637	0.636	0.636	0.636	0.636	0.635	0.635	0.635	0.634	0.634	0.633	0.633	0.632	0.632	0.631	0.63	0.63	0.629	0.629	0.628	0.627	0.627	0.626	0.626	0.625	0.625	0.624	0.624	0.623	0.623	0.623	0.622	0.622	0.622	0.622	0.622
0.637	0.637	0.637	0.637	0.637	0.637	0.637	0.637	0.637	0.637	0.637	0.637	0.637	0.637	0.636	0.636	0.636	0.636	0.636	0.635	0.635	0.635	0.634	0.634	0.633	0.633	0.632	0.631	0.631	0.63	0.63	0.629	0.628	0.628	0.627	0.627	0.626	0.626	0.625	0.624	0.624	0.623	0.623	0.623	0.622	0.622	0.622	0.622	0.622	0.621
0.637	0.636	0.636	0.636	0.636	0.636	0.636	0.636	0.637	0.637	0.637	0.637	0.637	0.636	0.636	0.636	0.636	0.636	0.635	0.635	0.635	0.634	0.634	0.633	0.633	0.632	0.632	0.631	0.63	0.63	0.629	0.629	0.628	0.627	0.627	0.626	0.626	0.625	0.625	0.624	0.624	0.623	0.623	0.622	0.622	0.622	0.622	0.621	0.621	0.621
0.636	0.636	0.636	0.636	0.636	0.636	0.636	0.636	0.636	0.636	0.636	0.636	0.636	0.636	0.636	0.636	0.635	0.635	0.635	0.635	0.634	0.634	0.634	0.633	0.633	0.632	0.631	0.631	0.63	0.629	0.629	0.628	0.628	0.627	0.627	0.626	0.626	0.625	0.624	0.624	0.623	0.623	0.623	0.622	0.622	0.621	0.621	0.621	0.621	0.621
0.635	0.635	0.635	0.635	0.635	0.635	0.635	0.636	0.636	0.636	0.636	0.636	0.636	0.636	0.636	0.635	0.635	0.635	0.635	0.634	0.634	0.634	0.633	0.633	0.632	0.632	0.631	0.63	0.63	0.629	0.629	0.628	0.627	0.627	0.626	0.626	0.625	0.625	0.624	0.624	0.623	0.623	0.622	0.622	0.621	0.621	0.621	0.621	0.62	0.62
0.634	0.634	0.634	0.635	0.635	0.635	0.635	0.635	0.635	0.635	0.636	0.636	0.636	0.635	0.635	0.635	0.635	0.635	0.634	0.634	0.634	0.633	0.633	0.632	0.632	0.631	0.631	0.63	0.629	0.629	0.628	0.628	0.627	0.626	0.626	0.625	0.625	0.624	0.624	0.623	0.623	0.622	0.622	0.621	0.621	0.621	0.62	0.62	0.62	0.62
0.633	0.634	0.634	0.634	0.634	0.634	0.634	0.635	0.635	0.635	0.635	0.635	0.635	0.635	0.635	0.635	0.634	0.634	0.634	0.634	0.633	0.633	0.633	0.632	0.632	0.631	0.63	0.63	0.629	0.628	0.628	0.627	0.627	0.626	0.625	0.625	0.624	0.624	0.623	0.623	0.622	0.622	0.621	0.621	0.621	0.62	0.62	0.62	0.62	0.62
0.633	0.633	0.633	0.633	0.633	0.634	0.634	0.634	0.634	0.635	0.635	0.635	0.635	0.635	0.635	0.634	0.634	0.634	0.634	0.633	0.633	0.633	0.632	0.632	0.631	0.631	0.63	0.629	0.629	0.628	0.627	0.627	0.626	0.626	0.625	0.625	0.624	0.624	0.623	0.623	0.622	0.622	0.621	0.621	0.62	0.62	0.62	0.619	0.619	0.619
0.632	0.632	0.632	0.633	0.633	0.633	0.633	0.634	0.634	0.634	0.634	0.634	0.634	0.634	0.634	0.634	0.634	0.633	0.633	0.633	0.633	0.632	0.632	0.631	0.631	0.63	0.63	0.629	0.628	0.628	0.627	0.626	0.626	0.625	0.625	0.624	0.624	0.623	0.623	0.622	0.622	0.621	0.621	0.62	0.62	0.619	0.619	0.619	0.619	0.619
0.631	0.631	0.632	0.632	0.632	0.633	0.633	0.633	0.634	0.634	0.634	0.634	0.634	0.634	0.634	0.634	0.633	0.633	0.633	0.633	0.632	0.632	0.631	0.631	0.63	0.63	0.629	0.629	0.628	0.627	0.627	0.626	0.625	0.625	0.624	0.624	0.623	0.623	0.622	0.622	0.621	0.621	0.62	0.62	0.619	0.619	0.619	0.619	0.618	0.618
0.631	0.631	0.631	0.632	0.632	0.632	0.633	0.633	0.633	0.633	0.634	0.634	0.634	0.634	0.633	0.633	0.633	0.633	0.632	0.632	0.632	0.631	0.631	0.631	0.63	0.629	0.629	0.628	0.627	0.627	0.626	0.626	0.625	0.624	0.624	0.623	0.623	0.622	0.622	0.621	0.621	0.62	0.62	0.619	0.619	0.619	0.618	0.618	0.618	0.618
0.63	0.63	0.631	0.631	0.631	0.632	0.632	0.633	0.633	0.633	0.633	0.633	0.633	0.633	0.633	0.633	0.632	0.632	0.632	0.632	0.631	0.631	0.631	0.63	0.63	0.629	0.628	0.628	0.627	0.626	0.626	0.625	0.625	0.624	0.623	0.623	0.622	0.622	0.621	0.621	0.62	0.62	0.62	0.619	0.619	0.618	0.618	0.618	0.618	0.617
0.63	0.63	0.63	0.631	0.631	0.631	0.632	0.632	0.632	0.633	0.633	0.633	0.633	0.633	0.633	0.632	0.632	0.632	0.631	0.631	0.631	0.631	0.63	0.63	0.629	0.629	0.628	0.627	0.627	0.626	0.625	0.625	0.624	0.624	0.623	0.623	0.622	0.622	0.621	0.621	0.62	0.62	0.619	0.619	0.618	0.618	0.618	0.617	0.617	0.617
0.629	0.63	0.63	0.63	0.631	0.631	0.631	0.632	0.632	0.632	0.632	0.632	0.632	0.632	0.632	0.632	0.632	0.631	0.631	0.631	0.63	0.63	0.63	0.629	0.629	0.628	0.628	0.627	0.626	0.626	0.625	0.624	0.624	0.623	0.623	0.622	0.622	0.621	0.621	0.62	0.62	0.619	0.619	0.618	0.618	0.618	0.617	0.617	0.617	0.617
0.629	0.629	0.63	0.63	0.63	0.631	0.631	0.631	0.632	0.632	0.632	0.632	0.632	0.632	0.632	0.631	0.631	0.631	0.631	0.63	0.63	0.63	0.629	0.629	0.628	0.628	0.627	0.626	0.626	0.625	0.624	0.624	0.623	0.623	0.622	0.622	0.621	0.621	0.62	0.62	0.619	0.619	0.618	0.618	0.618	0.617	0.617	0.617	0.616	0.616
0.628	0.629	0.629	0.629	0.63	0.63	0.63	0.631	0.631	0.631	0.631	0.631	0.631	0.631	0.631	0.631	0.631	0.63	0.63	0.63	0.629	0.629	0.629	0.628	0.628	0.627	0.627	0.626	0.625	0.625	0.624	0.623	0.623	0.622	0.622	0.621	0.621	0.62	0.62	0.619	0.619	0.618	0.618	0.618	0.617	0.617	0.616	0.616	0.616	0.616
0.628	0.628	0.628	0.629	0.629	0.63	0.63	0.63	0.63	0.631	0.631	0.631	0.631	0.631	0.631	0.63	0.63	0.63	0.63	0.629	0.629	0.629	0.628	0.628	0.627	0.627	0.626	0.626	0.625	0.624	0.624	0.623	0.622	0.622	0.621	0.621	0.62	0.62	0.619	0.619	0.619	0.618	0.618	0.617	0.617	0.616	0.616	0.616	0.616	0.616
0.627	0.627	0.628	0.628	0.629	0.629	0.629	0.63	0.63	0.63	0.63	0.63	0.63	0.63	0.63	0.63	0.63	0.629	0.629	0.629	0.628	0.628	0.628	0.627	0.627	0.626	0.626	0.625	0.624	0.624	0.623	0.623	0.622	0.621	0.621	0.62	0.62	0.62	0.619	0.619	0.618	0.618	0.617	0.617	0.616	0.616	0.616	0.616	0.615	0.615
0.626	0.627	0.627	0.628	0.628	0.628	0.629	0.629	0.629	0.63	0.63	0.63	0.63	0.63	0.63	0.629	0.629	0.629	0.629	0.628	0.628	0.628	0.627	0.627	0.626	0.626	0.625	0.625	0.624	0.623	0.623	0.622	0.622	0.621	0.62	0.62	0.62	0.619	0.619	0.618	0.618	0.617	0.617	0.616	0.616	0.616	0.615	0.615	0.615	0.615
0.626	0.626	0.627	0.627	0.627	0.628	0.628	0.628	0.629	0.629	0.629	0.629	0.629	0.629	0.629	0.629	0.629	0.628	0.628	0.628	0.627	0.627	0.627	0.626	0.626	0.625	0.625	0.624	0.623	0.623	0.622	0.622	0.621	0.621	0.62	0.62	0.619	0.619	0.618	0.618	0.617	0.617	0.616	0.616	0.616	0.615	0.615	0.615	0.615	0.615
0.625	0.626	0.626	0.626	0.627	0.627	0.628	0.628	0.628	0.628	0.629	0.629	0.629	0.629	0.628	0.628	0.628	0.628	0.628	0.627	0.627	0.627	0.626	0.626	0.625	0.625	0.624	0.624	0.623	0.622	0.622	0.621	0.621	0.62	0.62	0.619	0.619	0.618	0.618	0.617	0.617	0.616	0.616	0.615	0.615	0.615	0.615	0.615	0.614	0.614
0.625	0.625	0.626	0.626	0.626	0.627	0.627	0.627	0.628	0.628	0.628	0.628	0.628	0.628	0.628	0.628	0.628	0.627	0.627	0.627	0.626	0.626	0.626	0.625	0.625	0.624	0.624	0.623	0.622	0.622	0.621	0.621	0.62	0.62	0.619	0.619	0.618	0.618	0.617	0.617	0.616	0.616	0.615	0.615	0.615	0.615	0.614	0.614	0.614	0.614
0.625	0.625	0.625	0.626	0.626	0.626	0.627	0.627	0.627	0.627	0.628	0.628	0.628	0.628	0.627	0.627	0.627	0.627	0.627	0.626	0.626	0.626	0.625	0.625	0.624	0.624	0.623	0.623	0.622	0.621	0.621	0.62	0.62	0.619	0.619	0.618	0.618	0.617	0.617	0.616	0.616	0.615	0.615	0.615	0.614	0.614	0.614	0.614	0.614	0.614
0.624	0.625	0.625	0.625	0.626	0.626	0.626	0.627	0.627	0.627	0.627	0.627	0.627	0.627	0.627	0.627	0.627	0.626	0.626	0.626	0.626	0.625	0.625	0.624	0.624	0.623	0.623	0.622	0.622	0.621	0.62	0.62	0.619	0.619	0.618	0.618	0.617	0.617	0.616	0.616	0.615	0.615	0.615	0.614	0.614	0.614	0.614	0.614	0.613	0.613
0.624	0.625	0.625	0.625	0.626	0.626	0.626	0.626	0.626	0.627	0.627	0.627	0.627	0.627	0.626	0.626	0.626	0.626	0.626	0.625	0.625	0.625	0.624	0.624	0.623	0.623	0.622	0.622	0.621	0.621	0.62	0.62	0.619	0.619	0.618	0.618	0.617	0.617	0.616	0.616	0.615	0.615	0.614	0.614	0.614	0.614	0.613	0.613	0.613	0.613
0.625	0.625	0.625	0.625	0.626	0.626	0.626	0.626	0.626	0.626	0.626	0.626	0.626	0.626	0.626	0.626	0.626	0.625	0.625	0.625	0.625	0.624	0.624	0.624	0.623	0.623	0.622	0.621	0.621	0.62	0.62	0.619	0.619	0.618	0.618	0.617	0.617	0.616	0.616	0.615	0.615	0.614	0.614	0.614	0.614	0.613	0.613	0.613	0.613	0.613
0.625	0.625	0.625	0.625	0.626	0.626	0.626	0.626	0.626	0.626	0.626	0.626	0.626	0.626	0.626	0.625	0.625	0.625	0.625	0.625	0.624	0.624	0.624	0.623	0.623	0.622	0.622	0.621	0.621	0.62	0.619	0.619	0.618	0.618	0.617	0.617	0.616	0.616	0.616	0.615	0.615	0.614	0.614	0.614	0.613	0.613	0.613	0.613	0.613	0.613
0.625	0.625	0.625	0.625	0.626	0.626	0.626	0.626	0.626	0.626	0.626	0.626	0.626	0.625	0.625	0.625	0.625	0.625	0.624	0.624	0.624	0.623	0.623	0.623	0.622	0.622	0.621	0.621	0.62	0.62	0.619	0.619	0.618	0.618	0.617	0.617	0.616	0.616	0.615	0.615	0.614	0.614	0.614	0.613	0.613	0.613	0.613	0.612	0.612	0.612
0.625	0.625	0.625	0.626	0.626	0.626	0.626	0.625	0.625	0.625	0.625	0.625	0.625	0.625	0.625	0.625	0.624	0.624	0.624	0.624	0.623	0.623	0.623	0.622	0.622	0.621	0.621	0.62	0.62	0.619	0.619	0.618	0.618	0.618	0.617	0.617	0.616	0.616	0.615	0.615	0.614	0.614	0.613	0.613	0.613	0.612	0.612	0.612	0.612	0.612
0.625	0.625	0.625	0.626	0.626	0.625	0.625	0.625	0.625	0.625	0.625	0.625	0.625	0.625	0.624	0.624	0.624	0.624	0.624	0.623	0.623	0.623	0.622	0.622	0.622	0.621	0.621	0.62	0.62	0.619	0.619	0.618	0.618	0.617	0.617	0.616	0.616	0.615	0.615	0.614	0.614	0.613	0.613	0.613	0.612	0.612	0.612	0.612	0.612	0.612
0.625	0.625	0.625	0.625	0.625	0.625	0.625	0.625	0.625	0.625	0.625	0.624	0.624	0.624	0.624	0.624	0.624	0.623	0.623	0.623	0.623	0.622	0.622	0.622	0.621	0.621	0.62	0.62	0.619	0.619	0.618	0.618	0.617	0.617	0.617	0.616	0.616	0.615	0.615	0.614	0.614	0.613	0.613	0.613	0.612	0.612	0.612	0.612	0.611	0.611
0.625	0.625	0.625	0.625	0.625	0.625	0.625	0.625	0.625	0.624	0.624	0.624	0.624	0.624	0.624	0.623	0.623	0.623	0.623	0.623	0.622	0.622	0.622	0.621	0.621	0.62	0.62	0.62	0.619	0.619	0.618	0.618	0.617	0.617	0.616	0.616	0.615	0.615	0.614	0.614	0.613	0.613	0.613	0.612	0.612	0.612	0.612	0.611	0.611	0.611
0.625	0.625	0.625	0.625	0.625	0.625	0.625	0.624	0.624	0.624	0.624	0.624	0.624	0.623	0.623	0.623	0.623	0.623	0.622	0.622	0.622	0.621	0.621	0.621	0.62	0.62	0.62	0.619	0.619	0.618	0.618	0.617	0.617	0.617	0.616	0.616	0.615	0.615	0.614	0.614	0.613	0.613	0.612	0.612	0.612	0.611	0.611	0.611	0.611	0.611
0.625	0.625	0.625	0.625	0.625	0.625	0.624	0.624	0.624	0.624	0.623	0.623	0.623	0.623	0.623	0.623	0.622	0.622	0.622	0.622	0.621	0.621	0.621	0.62	0.62	0.62	0.619	0.619	0.618	0.618	0.618	0.617	0.617	0.616	0.616	0.615	0.615	0.614	0.614	0.613	0.613	0.613	0.612	0.612	0.612	0.611	0.611	0.611	0.611	0.61
0.625	0.625	0.625	0.625	0.625	0.625	0.624	0.624	0.624	0.623	0.623	0.623	0.623	0.623	0.622	0.622	0.622	0.622	0.622	0.621	0.621	0.621	0.62	0.62	0.62	0.619	0.619	0.618	0.618	0.618	0.617	0.617	0.616	0.616	0.616	0.615	0.615	0.614	0.614	0.613	0.613	0.612	0.612	0.612	0.611	0.611	0.611	0.611	0.61	0.61
0.624	0.625	0.625	0.625	0.625	0.624	0.624	0.624	0.623	0.623	0.623	0.623	0.622	0.622	0.622	0.622	0.622	0.621	0.621	0.621	0.62	0.62	0.62	0.619	0.619	0.619	0.618	0.618	0.618	0.617	0.617	0.616	0.616	0.616	0.615	0.615	0.614	0.614	0.613	0.613	0.613	0.612	0.612	0.611	0.611	0.611	0.61	0.61	0.61	0.61
0.624	0.625	0.625	0.625	0.625	0.624	0.624	0.623	0.623	0.623	0.623	0.622	0.622	0.622	0.622	0.621	0.621	0.621	0.621	0.62	0.62	0.62	0.619	0.619	0.619	0.618	0.618	0.618	0.617	0.617	0.617	0.616	0.616	0.615	0.615	0.614	0.614	0.614	0.613	0.613	0.612	0.612	0.612	0.611	0.611	0.61	0.61	0.61	0.61	0.609
0.625	0.625	0.625	0.625	0.624	0.624	0.624	0.623	0.623	0.623	0.622	0.622	0.622	0.622	0.621	0.621	0.621	0.621	0.62	0.62	0.62	0.619	0.619	0.619	0.618	0.618	0.618	0.617	0.617	0.616	0.616	0.616	0.615	0.615	0.615	0.614	0.614	0.613	0.613	0.612	0.612	0.612	0.611	0.611	0.611	0.61	0.61	0.61	0.609	0.609
0.625	0.625	0.625	0.625	0.624	0.624	0.624	0.623	0.623	0.622	0.622	0.622	0.622	0.621	0.621	0.621	0.62	0.62	0.62	0.619	0.619	0.619	0.618	0.618	0.618	0.617	0.617	0.617	0.616	0.616	0.616	0.615	0.615	0.615	0.614	0.614	0.613	0.613	0.613	0.612	0.612	0.611	0.611	0.611	0.61	0.61	0.61	0.609	0.609	0.609
0.625	0.625	0.625	0.625	0.624	0.624	0.623	0.623	0.622	0.622	0.622	0.621	0.621	0.621	0.621	0.62	0.62	0.62	0.619	0.619	0.619	0.618	0.618	0.618	0.617	0.617	0.617	0.616	0.616	0.616	0.615	0.615	0.614	0.614	0.614	0.613	0.613	0.613	0.612	0.612	0.611	0.611	0.611	0.61	0.61	0.61	0.609	0.609	0.609	0.609
0.625	0.625	0.625	0.625	0.624	0.624	0.623	0.623	0.622	0.622	0.622	0.621	0.621	0.621	0.62	0.62	0.62	0.619	0.619	0.619	0.618	0.618	0.617	0.617	0.617	0.616	0.616	0.616	0.616	0.615	0.615	0.614	0.614	0.614	0.613	0.613	0.613	0.612	0.612	0.611	0.611	0.611	0.61	0.61	0.61	0.609	0.609	0.609	0.608	0.608
0.626	0.626	0.625	0.625	0.625	0.624	0.623	0.623	0.622	0.622	0.621	0.621	0.621	0.62	0.62	0.62	0.619	0.619	0.619	0.618	0.618	0.617	0.617	0.617	0.616	0.616	0.616	0.615	0.615	0.615	0.614	0.614	0.614	0.613	0.613	0.612	0.612	0.612	0.611	0.611	0.611	0.61	0.61	0.61	0.609	0.609	0.609	0.608	0.608	0.608
0.626	0.626	0.625	0.625	0.625	0.624	0.623	0.623	0.622	0.621	0.621	0.621	0.62	0.62	0.62	0.619	0.619	0.619	0.618	0.618	0.617	0.617	0.617	0.616	0.616	0.616	0.615	0.615	0.615	0.614	0.614	0.613	0.613	0.613	0.612	0.612	0.612	0.611	0.611	0.611	0.61	0.61	0.61	0.609	0.609	0.609	0.608	0.608	0.608	0.608
0.626	0.626	0.625	0.625	0.624	0.624	0.623	0.622	0.622	0.621	0.621	0.62	0.62	0.62	0.619	0.619	0.619	0.618	0.618	0.617	0.617	0.617	0.616	0.616	0.615	0.615	0.615	0.614	0.614	0.614	0.613	0.613	0.613	0.612	0.612	0.612	0.611	0.611	0.611	0.61	0.61	0.61	0.609	0.609	0.609	0.608	0.608	0.608	0.607	0.607
0.626	0.626	0.625	0.625	0.624	0.624	0.623	0.622	0.622	0.621	0.621	0.62	0.62	0.619	0.619	0.619	0.618	0.618	0.617	0.617	0.617	0.616	0.616	0.615	0.615	0.615	0.614	0.614	0.614	0.613	0.613	0.612	0.612	0.612	0.611	0.611	0.611	0.61	0.61	0.61	0.609	0.609	0.609	0.609	0.608	0.608	0.608	0.607	0.607	0.607
0.626	0.625	0.625	0.625	0.624	0.623	0.623	0.622	0.621	0.621	0.62	0.62	0.619	0.619	0.619	0.618	0.618	0.618	0.617	0.617	0.616	0.616	0.615	0.615	0.614	0.614	0.614	0.613	0.613	0.613	0.612	0.612	0.611	0.611	0.611	0.611	0.61	0.61	0.61	0.609	0.609	0.609	0.608	0.608	0.608	0.608	0.607	0.607	0.607	0.607
0.625	0.625	0.625	0.625	0.624	0.623	0.623	0.622	0.621	0.621	0.62	0.62	0.619	0.619	0.618	0.618	0.618	0.617	0.617	0.616	0.616	0.615	0.615	0.614	0.614	0.614	0.613	0.613	0.612	0.612	0.612	0.611	0.611	0.611	0.61	0.61	0.61	0.609	0.609	0.609	0.609	0.608	0.608	0.608	0.607	0.607	0.607	0.607	0.606	0.606
0.625	0.625	0.625	0.624	0.624	0.623	0.622	0.622	0.621	0.62	0.62	0.619	0.619	0.618	0.618	0.618	0.617	0.617	0.616	0.616	0.615	0.615	0.614	0.614	0.613	0.613	0.613	0.612	0.612	0.611	0.611	0.611	0.61	0.61	0.61	0.609	0.609	0.609	0.609	0.608	0.608	0.608	0.608	0.607	0.607	0.607	0.607	0.606	0.606	0.606
0.625	0.625	0.624	0.624	0.623	0.623	0.622	0.621	0.621	0.62	0.62	0.619	0.619	0.618	0.618	0.617	0.617	0.616	0.616	0.615	0.615	0.614	0.614	0.613	0.613	0.613	0.612	0.612	0.611	0.611	0.611	0.61	0.61	0.609	0.609	0.609	0.609	0.608	0.608	0.608	0.608	0.607	0.607	0.607	0.607	0.606	0.606	0.606	0.606	0.606
0.625	0.624	0.624	0.624	0.623	0.623	0.622	0.621	0.621	0.62	0.619	0.619	0.618	0.618	0.617	0.617	0.617	0.616	0.616	0.615	0.614	0.614	0.613	0.613	0.612	0.612	0.612	0.611	0.611	0.61	0.61	0.61	0.609	0.609	0.609	0.608	0.608	0.608	0.608	0.607	0.607	0.607	0.607	0.607	0.606	0.606	0.606	0.606	0.606	0.605
0.624	0.624	0.624	0.624	0.623	0.622	0.622	0.621	0.62	0.62	0.619	0.619	0.618	0.618	0.617	0.617	0.616	0.616	0.615	0.615	0.614	0.613	0.613	0.612	0.612	0.612	0.611	0.611	0.61	0.61	0.609	0.609	0.609	0.608	0.608	0.608	0.608	0.607	0.607	0.607	0.607	0.607	0.606	0.606	0.606	0.606	0.606	0.605	0.605	0.605
0.624	0.624	0.624	0.623	0.623	0.622	0.622	0.621	0.62	0.62	0.619	0.618	0.618	0.617	0.617	0.616	0.616	0.615	0.615	0.614	0.614	0.613	0.613	0.612	0.612	0.611	0.611	0.61	0.61	0.609	0.609	0.608	0.608	0.608	0.608	0.607	0.607	0.607	0.607	0.607	0.606	0.606	0.606	0.606	0.606	0.605	0.605	0.605	0.605	0.605
0.624	0.624	0.624	0.623	0.623	0.622	0.621	0.621	0.62	0.619	0.619	0.618	0.618	0.617	0.617	0.616	0.616	0.615	0.615	0.614	0.613	0.613	0.612	0.612	0.611	0.611	0.61	0.61	0.609	0.609	0.608	0.608	0.608	0.607	0.607	0.607	0.607	0.606	0.606	0.606	0.606	0.606	0.606	0.605	0.605	0.605	0.605	0.605	0.605	0.605
0.624	0.624	0.624	0.623	0.623	0.622	0.621	0.621	0.62	0.619	0.619	0.618	0.618	0.617	0.617	0.616	0.615	0.615	0.614	0.614	0.613	0.612	0.612	0.611	0.611	0.61	0.61	0.609	0.609	0.608	0.608	0.607	0.607	0.607	0.607	0.606	0.606	0.606	0.606	0.606	0.606	0.605	0.605	0.605	0.605	0.605	0.605	0.605	0.605	0.605
0.624	0.624	0.624	0.623	0.623	0.622	0.621	0.621	0.62	0.619	0.619	0.618	0.617	0.617	0.616	0.616	0.615	0.615	0.614	0.613	0.613	0.612	0.612	0.611	0.61	0.61	0.609	0.609	0.608	0.608	0.607	0.607	0.607	0.606	0.606	0.606	0.606	0.606	0.605	0.605	0.605	0.605	0.605	0.605	0.605	0.605	0.604	0.604	0.604	0.604
0.624	0.624	0.623	0.623	0.622	0.622	0.621	0.62	0.62	0.619	0.618	0.618	0.617	0.617	0.616	0.616	0.615	0.614	0.614	0.613	0.613	0.612	0.611	0.611	0.61	0.61	0.609	0.609	0.608	0.608	0.607	0.607	0.606	0.606	0.606	0.606	0.605	0.605	0.605	0.605	0.605	0.605	0.605	0.605	0.604	0.604	0.604	0.604	0.604	0.604
0.624	0.624	0.623	0.623	0.622	0.622	0.621	0.62	0.62	0.619	0.618	0.618	0.617	0.617	0.616	0.615	0.615	0.614	0.614	0.613	0.612	0.612	0.611	0.61	0.61	0.609	0.609	0.608	0.608	0.607	0.607	0.606	0.606	0.606	0.606	0.605	0.605	0.605	0.605	0.605	0.605	0.604	0.604	0.604	0.604	0.604	0.604	0.604	0.604	0.604
0.624	0.623	0.623	0.623	0.622	0.621	0.621	0.62	0.619	0.619	0.618	0.617	0.617	0.616	0.616	0.615	0.615	0.614	0.613	0.613	0.612	0.611	0.611	0.61	0.61	0.609	0.609	0.608	0.607	0.607	0.607	0.606	0.606	0.606	0.605	0.605	0.605	0.605	0.605	0.604	0.604	0.604	0.604	0.604	0.604	0.604	0.604	0.604	0.604	0.604
0.623	0.623	0.623	0.622	0.622	0.621	0.62	0.62	0.619	0.618	0.618	0.617	0.617	0.616	0.616	0.615	0.614	0.614	0.613	0.613	0.612	0.611	0.611	0.61	0.609	0.609	0.608	0.608	0.607	0.607	0.606	0.606	0.606	0.605	0.605	0.605	0.605	0.605	0.604	0.604	0.604	0.604	0.604	0.604	0.604	0.604	0.604	0.604	0.604	0.604
0.623	0.623	0.622	0.622	0.621	0.621	0.62	0.619	0.619	0.618	0.618	0.617	0.616	0.616	0.615	0.615	0.614	0.614	0.613	0.612	0.612	0.611	0.61	0.61	0.609	0.609	0.608	0.608	0.607	0.607	0.606	0.606	0.605	0.605	0.605	0.605	0.605	0.604	0.604	0.604	0.604	0.604	0.604	0.604	0.604	0.604	0.604	0.604	0.604	0.604
0.622	0.622	0.622	0.621	0.621	0.62	0.62	0.619	0.618	0.618	0.617	0.617	0.616	0.616	0.615	0.614	0.614	0.613	0.613	0.612	0.611	0.611	0.61	0.61	0.609	0.608	0.608	0.607	0.607	0.606	0.606	0.606	0.605	0.605	0.605	0.605	0.604	0.604	0.604	0.604	0.604	0.604	0.604	0.604	0.604	0.604	0.604	0.604	0.603	0.603
0.622	0.621	0.621	0.621	0.62	0.62	0.619	0.619	0.618	0.618	0.617	0.616	0.616	0.615	0.615	0.614	0.614	0.613	0.612	0.612	0.611	0.611	0.61	0.609	0.609	0.608	0.608	0.607	0.607	0.606	0.606	0.605	0.605	0.605	0.605	0.604	0.604	0.604	0.604	0.604	0.604	0.604	0.604	0.604	0.604	0.603	0.603	0.603	0.603	0.603
0.621	0.621	0.621	0.62	0.62	0.619	0.619	0.618	0.618	0.617	0.617	0.616	0.615	0.615	0.614	0.614	0.613	0.613	0.612	0.612	0.611	0.61	0.61	0.609	0.609	0.608	0.608	0.607	0.606	0.606	0.606	0.605	0.605	0.605	0.604	0.604	0.604	0.604	0.604	0.604	0.604	0.604	0.603	0.603	0.603	0.603	0.603	0.603	0.603	0.603
0.62	0.62	0.62	0.62	0.619	0.619	0.618	0.618	0.617	0.617	0.616	0.616	0.615	0.615	0.614	0.614	0.613	0.612	0.612	0.611	0.611	0.61	0.61	0.609	0.608	0.608	0.607	0.607	0.606	0.606	0.605	0.605	0.605	0.604	0.604	0.604	0.604	0.604	0.604	0.603	0.603	0.603	0.603	0.603	0.603	0.603	0.603	0.603	0.603	0.603
0.619	0.619	0.619	0.619	0.619	0.618	0.618	0.618	0.617	0.616	0.616	0.615	0.615	0.614	0.614	0.613	0.613	0.612	0.612	0.611	0.611	0.61	0.609	0.609	0.608	0.608	0.607	0.607	0.606	0.606	0.605	0.605	0.605	0.604	0.604	0.604	0.604	0.604	0.603	0.603	0.603	0.603	0.603	0.603	0.603	0.603	0.603	0.603	0.603	0.603
0.619	0.619	0.619	0.619	0.618	0.618	0.618	0.617	0.617	0.616	0.616	0.615	0.615	0.614	0.614	0.613	0.612	0.612	0.611	0.611	0.61	0.61	0.609	0.609	0.608	0.607	0.607	0.606	0.606	0.605	0.605	0.605	0.604	0.604	0.604	0.604	0.603	0.603	0.603	0.603	0.603	0.603	0.603	0.603	0.603	0.603	0.603	0.603	0.603	0.603
0.618	0.618	0.618	0.618	0.618	0.618	0.617	0.617	0.616	0.616	0.615	0.615	0.614	0.614	0.613	0.613	0.612	0.612	0.611	0.611	0.61	0.609	0.609	0.608	0.608	0.607	0.607	0.606	0.606	0.605	0.605	0.604	0.604	0.604	0.604	0.603	0.603	0.603	0.603	0.603	0.603	0.603	0.603	0.603	0.603	0.603	0.603	0.603	0.603	0.603
0.618	0.618	0.618	0.618	0.618	0.617	0.617	0.617	0.616	0.616	0.615	0.615	0.614	0.614	0.613	0.613	0.612	0.612	0.611	0.61	0.61	0.609	0.609	0.608	0.608	0.607	0.607	0.606	0.605	0.605	0.605	0.604	0.604	0.604	0.603	0.603	0.603	0.603	0.603	0.603	0.603	0.603	0.602	0.602	0.602	0.602	0.602	0.602	0.602	0.602
0.617	0.617	0.617	0.617	0.617	0.617	0.617	0.616	0.616	0.615	0.615	0.614	0.614	0.613	0.613	0.612	0.612	0.611	0.611	0.61	0.61	0.609	0.609	0.608	0.607	0.607	0.606	0.606	0.605	0.605	0.604	0.604	0.604	0.603	0.603	0.603	0.603	0.603	0.603	0.602	0.602	0.602	0.602	0.602	0.602	0.602	0.602	0.602	0.602	0.602
0.617	0.617	0.617	0.617	0.617	0.617	0.616	0.616	0.615	0.615	0.615	0.614	0.614	0.613	0.613	0.612	0.612	0.611	0.611	0.61	0.61	0.609	0.608	0.608	0.607	0.607	0.606	0.606	0.605	0.605	0.604	0.604	0.604	0.603	0.603	0.603	0.603	0.602	0.602	0.602	0.602	0.602	0.602	0.602	0.602	0.602	0.602	0.602	0.602	0.602
0.616	0.616	0.616	0.617	0.616	0.616	0.616	0.616	0.615	0.615	0.614	0.614	0.613	0.613	0.612	0.612	0.612	0.611	0.61	0.61	0.609	0.609	0.608	0.608	0.607	0.607	0.606	0.606	0.605	0.605	0.604	0.604	0.603	0.603	0.603	0.603	0.602	0.602	0.602	0.602	0.602	0.602	0.602	0.602	0.602	0.602	0.602	0.602	0.602	0.602
0.615	0.616	0.616	0.616	0.616	0.616	0.616	0.615	0.615	0.615	0.614	0.614	0.613	0.613	0.612	0.612	0.611	0.611	0.61	0.61	0.609	0.609	0.608	0.608	0.607	0.607	0.606	0.605	0.605	0.604	0.604	0.604	0.603	0.603	0.603	0.602	0.602	0.602	0.602	0.602	0.602	0.602	0.602	0.602	0.602	0.602	0.602	0.602	0.602	0.602
0.615	0.615	0.615	0.615	0.616	0.615	0.615	0.615	0.615	0.614	0.614	0.613	0.613	0.613	0.612	0.612	0.611	0.611	0.61	0.61	0.609	0.609	0.608	0.608	0.607	0.607	0.606	0.605	0.605	0.604	0.604	0.604	0.603	0.603	0.603	0.602	0.602	0.602	0.602	0.602	0.602	0.602	0.601	0.601	0.601	0.601	0.601	0.601	0.601	0.601
0.614	0.614	0.615	0.615	0.615	0.615	0.615	0.615	0.614	0.614	0.614	0.613	0.613	0.612	0.612	0.612	0.611	0.611	0.61	0.61	0.609	0.609	0.608	0.608	0.607	0.606	0.606	0.605	0.605	0.604	0.604	0.603	0.603	0.603	0.602	0.602	0.602	0.602	0.602	0.602	0.601	0.601	0.601	0.601	0.601	0.601	0.601	0.601	0.601	0.601
0.613	0.614	0.614	0.615	0.615	0.615	0.615	0.614	0.614	0.614	0.613	0.613	0.613	0.612	0.612	0.612	0.611	0.611	0.61	0.61	0.609	0.609	0.608	0.607	0.607	0.606	0.606	0.605	0.605	0.604	0.604	0.603	0.603	0.603	0.602	0.602	0.602	0.602	0.601	0.601	0.601	0.601	0.601	0.601	0.601	0.601	0.601	0.601	0.601	0.601
0.612	0.613	0.614	0.614	0.614	0.614	0.614	0.614	0.614	0.614	0.613	0.613	0.613	0.612	0.612	0.611	0.611	0.611	0.61	0.61	0.609	0.609	0.608	0.607	0.607	0.606	0.606	0.605	0.605	0.604	0.604	0.603	0.603	0.603	0.602	0.602	0.602	0.602	0.601	0.601	0.601	0.601	0.601	0.601	0.601	0.601	0.601	0.601	0.601	0.601
0.611	0.612	0.613	0.614	0.614	0.614	0.614	0.614	0.614	0.613	0.613	0.613	0.612	0.612	0.612	0.611	0.611	0.611	0.61	0.61	0.609	0.608	0.608	0.607	0.607	0.606	0.606	0.605	0.605	0.604	0.604	0.603	0.603	0.602	0.602	0.602	0.602	0.601	0.601	0.601	0.601	0.601	0.601	0.601	0.601	0.601	0.601	0.601	0.601	0.601
0.611	0.612	0.613	0.613	0.614	0.614	0.614	0.614	0.614	0.613	0.613	0.613	0.612	0.612	0.612	0.611	0.611	0.611	0.61	0.61	0.609	0.608	0.608	0.607	0.607	0.606	0.606	0.605	0.605	0.604	0.604	0.603	0.603	0.602	0.602	0.602	0.601	0.601	0.601	0.601	0.601	0.601	0.6	0.6	0.6	0.6	0.6	0.6	0.6	0.6
0.61	0.611	0.612	0.613	0.613	0.614	0.614	0.614	0.613	0.613	0.613	0.613	0.612	0.612	0.612	0.611	0.611	0.61	0.61	0.61	0.609	0.608	0.608	0.607	0.607	0.606	0.606	0.605	0.605	0.604	0.604	0.603	0.603	0.602	0.602	0.602	0.601	0.601	0.601	0.601	0.6	0.6	0.6	0.6	0.6	0.6	0.6	0.6	0.6	0.6
0.61	0.611	0.612	0.613	0.613	0.614	0.614	0.614	0.613	0.613	0.613	0.613	0.612	0.612	0.612	0.611	0.611	0.611	0.61	0.61	0.609	0.608	0.608	0.607	0.607	0.606	0.606	0.605	0.605	0.604	0.603	0.603	0.603	0.602	0.602	0.602	0.601	0.601	0.601	0.601	0.6	0.6	0.6	0.6	0.6	0.6	0.6	0.6	0.6	0.6
0.61	0.611	0.612	0.613	0.613	0.614	0.614	0.614	0.613	0.613	0.613	0.613	0.612	0.612	0.612	0.611	0.611	0.611	0.61	0.61	0.609	0.608	0.608	0.607	0.607	0.606	0.606	0.605	0.605	0.604	0.603	0.603	0.603	0.602	0.602	0.601	0.601	0.601	0.601	0.6	0.6	0.6	0.6	0.6	0.6	0.6	0.6	0.6	0.6	0.6
0.609	0.611	0.612	0.613	0.613	0.613	0.614	0.613	0.613	0.613	0.613	0.613	0.612	0.612	0.612	0.611	0.611	0.611	0.61	0.61	0.609	0.609	0.608	0.607	0.607	0.606	0.606	0.605	0.605	0.604	0.603	0.603	0.603	0.602	0.602	0.601	0.601	0.601	0.601	0.6	0.6	0.6	0.6	0.6	0.6	0.6	0.6	0.6	0.6	0.6
0.609	0.61	0.612	0.612	0.613	0.613	0.613	0.613	0.613	0.613	0.613	0.613	0.612	0.612	0.612	0.611	0.611	0.611	0.61	0.61	0.609	0.609	0.608	0.607	0.607	0.606	0.606	0.605	0.605	0.604	0.603	0.603	0.603	0.602	0.602	0.601	0.601	0.601	0.601	0.6	0.6	0.6	0.6	0.6	0.6	0.6	0.6	0.6	0.6	0.6
0.609	0.61	0.611	0.612	0.613	0.613	0.613	0.613	0.613	0.613	0.613	0.613	0.612	0.612	0.612	0.611	0.611	0.611	0.61	0.61	0.609	0.609	0.608	0.607	0.607	0.606	0.606	0.605	0.605	0.604	0.604	0.603	0.603	0.602	0.602	0.602	0.601	0.601	0.601	0.6	0.6	0.6	0.6	0.6	0.6	0.6	0.6	0.6	0.6	0.6
0.609	0.61	0.611	0.612	0.613	0.613	0.613	0.613	0.613	0.613	0.613	0.612	0.612	0.612	0.612	0.611	0.611	0.611	0.61	0.61	0.609	0.609	0.608	0.607	0.607	0.606	0.606	0.605	0.605	0.604	0.604	0.603	0.603	0.602	0.602	0.602	0.601	0.601	0.601	0.601	0.6	0.6	0.6	0.6	0.6	0.6	0.6	0.6	0.6	0.6
0.609	0.61	0.611	0.612	0.613	0.613	0.613	0.613	0.613	0.613	0.613	0.612	0.612	0.612	0.612	0.611	0.611	0.611	0.61	0.61	0.609	0.609	0.608	0.608	0.607	0.606	0.606	0.605	0.605	0.604	0.604	0.603	0.603	0.602	0.602	0.602	0.601	0.601	0.601	0.601	0.6	0.6	0.6	0.6	0.6	0.6	0.6	0.6	0.6	0.6
0.609	0.61	0.611	0.612	0.613	0.613	0.613	0.613	0.613	0.613	0.613	0.612	0.612	0.612	0.612	0.612	0.611	0.611	0.61	0.61	0.609	0.609	0.608	0.608	0.607	0.606	0.606	0.605	0.605	0.604	0.604	0.603	0.603	0.603	0.602	0.602	0.602	0.601	0.601	0.601	0.601	0.6	0.6	0.6	0.6	0.6	0.6	0.6	0.6	0.6
0.609	0.61	0.611	0.612	0.613	0.613	0.613	0.613	0.613	0.613	0.613	0.612	0.612	0.612	0.612	0.612	0.611	0.611	0.61	0.61	0.609	0.609	0.608	0.608	0.607	0.607	0.606	0.605	0.605	0.604	0.604	0.604	0.603	0.603	0.602	0.602	0.602	0.601	0.601	0.601	0.601	0.601	0.6	0.6	0.6	0.6	0.6	0.6	0.6	0.6
0.609	0.61	0.611	0.612	0.613	0.613	0.613	0.613	0.613	0.613	0.613	0.612	0.612	0.612	0.612	0.612	0.611	0.611	0.61	0.61	0.609	0.609	0.608	0.608	0.607	0.607	0.606	0.606	0.605	0.605	0.604	0.604	0.603	0.603	0.603	0.602	0.602	0.602	0.601	0.601	0.601	0.601	0.6	0.6	0.6	0.6	0.6	0.6	0.6	0.6
0.609	0.61	0.611	0.612	0.613	0.613	0.613	0.613	0.613	0.613	0.613	0.612	0.612	0.612	0.612	0.612	0.611	0.611	0.61	0.61	0.609	0.609	0.608	0.608	0.607	0.607	0.606	0.606	0.605	0.605	0.604	0.604	0.603	0.603	0.603	0.602	0.602	0.602	0.601	0.601	0.601	0.601	0.601	0.601	0.6	0.6	0.6	0.6	0.6	0.6
0.609	0.61	0.611	0.612	0.613	0.613	0.613	0.613	0.613	0.613	0.613	0.612	0.612	0.612	0.612	0.612	0.611	0.611	0.61	0.61	0.609	0.609	0.608	0.608	0.607	0.607	0.606	0.606	0.605	0.605	0.604	0.604	0.604	0.603	0.603	0.602	0.602	0.602	0.601	0.601	0.601	0.601	0.601	0.601	0.601	0.6	0.6	0.6	0.6	0.6
0.609	0.61	0.612	0.612	0.613	0.613	0.613	0.613	0.613	0.613	0.613	0.612	0.612	0.612	0.612	0.612	0.611	0.611	0.61	0.61	0.609	0.609	0.608	0.608	0.607	0.607	0.606	0.606	0.605	0.605	0.604	0.604	0.604	0.603	0.603	0.602	0.602	0.602	0.601	0.601	0.601	0.601	0.601	0.601	0.601	0.601	0.6	0.6	0.6	0.6
0.609	0.611	0.612	0.612	0.613	0.613	0.613	0.613	0.613	0.613	0.613	0.612	0.612	0.612	0.612	0.612	0.611	0.611	0.61	0.61	0.609	0.609	0.608	0.608	0.607	0.607	0.606	0.606	0.605	0.605	0.605	0.604	0.604	0.603	0.603	0.603	0.602	0.602	0.602	0.601	0.601	0.601	0.601	0.601	0.601	0.601	0.601	0.6	0.6	0.6
0.61	0.611	0.612	0.612	0.613	0.613	0.613	0.613	0.613	0.613	0.612	0.612	0.612	0.612	0.612	0.611	0.611	0.611	0.61	0.61	0.609	0.609	0.608	0.608	0.607	0.607	0.606	0.606	0.605	0.605	0.605	0.604	0.604	0.603	0.603	0.603	0.602	0.602	0.602	0.601	0.601	0.601	0.601	0.601	0.601	0.601	0.601	0.601	0.6	0.6
0.61	0.611	0.612	0.612	0.613	0.613	0.613	0.613	0.613	0.613	0.612	0.612	0.612	0.612	0.612	0.611	0.611	0.611	0.61	0.61	0.609	0.609	0.608	0.608	0.607	0.607	0.606	0.606	0.605	0.605	0.605	0.604	0.604	0.603	0.603	0.603	0.602	0.602	0.602	0.601	0.601	0.601	0.601	0.601	0.601	0.601	0.601	0.601	0.6	0.6
0.61	0.611	0.612	0.612	0.613	0.613	0.613	0.613	0.613	0.612	0.612	0.612	0.612	0.612	0.611	0.611	0.611	0.61	0.61	0.61	0.609	0.609	0.608	0.608	0.607	0.607	0.606	0.606	0.605	0.605	0.605	0.604	0.604	0.603	0.603	0.603	0.602	0.602	0.602	0.601	0.601	0.601	0.601	0.601	0.601	0.601	0.601	0.601	0.601	0.6
0.61	0.611	0.612	0.612	0.613	0.613	0.613	0.613	0.613	0.612	0.612	0.612	0.612	0.611	0.611	0.611	0.611	0.61	0.61	0.61	0.609	0.609	0.608	0.608	0.607	0.607	0.606	0.606	0.605	0.605	0.605	0.604	0.604	0.603	0.603	0.603	0.602	0.602	0.602	0.602	0.601	0.601	0.601	0.601	0.601	0.601	0.601	0.601	0.6	0.6
0.61	0.611	0.612	0.612	0.613	0.613	0.613	0.613	0.612	0.612	0.612	0.612	0.611	0.611	0.611	0.611	0.61	0.61	0.61	0.609	0.609	0.608	0.608	0.608	0.607	0.607	0.606	0.606	0.605	0.605	0.605	0.604	0.604	0.603	0.603	0.603	0.602	0.602	0.602	0.602	0.601	0.601	0.601	0.601	0.601	0.601	0.601	0.601	0.6	0.6
0.61	0.611	0.611	0.612	0.613	0.613	0.613	0.613	0.612	0.612	0.612	0.611	0.611	0.611	0.611	0.611	0.61	0.61	0.61	0.609	0.609	0.608	0.608	0.607	0.607	0.607	0.606	0.606	0.605	0.605	0.605	0.604	0.604	0.603	0.603	0.603	0.602	0.602	0.602	0.602	0.601	0.601	0.601	0.601	0.601	0.601	0.601	0.601	0.6	0.6
0.61	0.611	0.611	0.612	0.612	0.613	0.613	0.612	0.612	0.612	0.611	0.611	0.611	0.611	0.611	0.61	0.61	0.61	0.609	0.609	0.609	0.608	0.608	0.607	0.607	0.606	0.606	0.606	0.605	0.605	0.604	0.604	0.604	0.603	0.603	0.603	0.602	0.602	0.602	0.602	0.601	0.601	0.601	0.601	0.601	0.601	0.601	0.6	0.6	0.6
0.61	0.61	0.611	0.612	0.612	0.613	0.612	0.612	0.612	0.612	0.611	0.611	0.611	0.611	0.61	0.61	0.61	0.61	0.609	0.609	0.609	0.608	0.608	0.607	0.607	0.606	0.606	0.606	0.605	0.605	0.604	0.604	0.604	0.603	0.603	0.603	0.602	0.602	0.602	0.602	0.601	0.601	0.601	0.601	0.601	0.601	0.6	0.6	0.6	0.6
0.609	0.61	0.611	0.612	0.612	0.612	0.612	0.612	0.612	0.612	0.611	0.611	0.611	0.611	0.61	0.61	0.61	0.61	0.609	0.609	0.608	0.608	0.608	0.607	0.607	0.606	0.606	0.605	0.605	0.605	0.604	0.604	0.604	0.603	0.603	0.603	0.602	0.602	0.602	0.601	0.601	0.601	0.601	0.601	0.601	0.6	0.6	0.6	0.6	0.6
0.609	0.61	0.611	0.612	0.612	0.612	0.612	0.612	0.612	0.611	0.611	0.611	0.611	0.611	0.61	0.61	0.61	0.61	0.609	0.609	0.608	0.608	0.608	0.607	0.607	0.606	0.606	0.605	0.605	0.605	0.604	0.604	0.603	0.603	0.603	0.602	0.602	0.602	0.602	0.601	0.601	0.601	0.601	0.601	0.6	0.6	0.6	0.6	0.6	0.6
0.609	0.61	0.611	0.611	0.612	0.612	0.612	0.612	0.612	0.611	0.611	0.611	0.611	0.61	0.61	0.61	0.61	0.609	0.609	0.609	0.608	0.608	0.607	0.607	0.607	0.606	0.606	0.605	0.605	0.605	0.604	0.604	0.603	0.603	0.603	0.602	0.602	0.602	0.602	0.601	0.601	0.601	0.601	0.6	0.6	0.6	0.6	0.6	0.6	0.6
0.609	0.61	0.611	0.611	0.612	0.612	0.612	0.612	0.612	0.611	0.611	0.611	0.611	0.61	0.61	0.61	0.61	0.609	0.609	0.609	0.608	0.608	0.607	0.607	0.607	0.606	0.606	0.605	0.605	0.604	0.604	0.604	0.603	0.603	0.603	0.602	0.602	0.602	0.601	0.601	0.601	0.601	0.601	0.6	0.6	0.6	0.6	0.6	0.6	0.6
0.609	0.61	0.611	0.611	0.612	0.612	0.612	0.612	0.612	0.611	0.611	0.611	0.611	0.61	0.61	0.61	0.61	0.609	0.609	0.609	0.608	0.608	0.607	0.607	0.607	0.606	0.606	0.605	0.605	0.604	0.604	0.604	0.603	0.603	0.603	0.602	0.602	0.602	0.601	0.601	0.601	0.601	0.6	0.6	0.6	0.6	0.6	0.6	0.6	0.6
0.609	0.61	0.61	0.611	0.612	0.612	0.612	0.612	0.612	0.611	0.611	0.611	0.611	0.61	0.61	0.61	0.61	0.609	0.609	0.609	0.608	0.608	0.607	0.607	0.607	0.606	0.606	0.605	0.605	0.604	0.604	0.604	0.603	0.603	0.603	0.602	0.602	0.602	0.601	0.601	0.601	0.601	0.6	0.6	0.6	0.6	0.6	0.6	0.6	0.6
0.608	0.609	0.61	0.611	0.612	0.612	0.612	0.612	0.611	0.611	0.611	0.611	0.611	0.61	0.61	0.61	0.61	0.609	0.609	0.609	0.608	0.608	0.607	0.607	0.607	0.606	0.606	0.605	0.605	0.604	0.604	0.604	0.603	0.603	0.602	0.602	0.602	0.602	0.601	0.601	0.601	0.601	0.6	0.6	0.6	0.6	0.6	0.6	0.6	0.6
0.608	0.609	0.61	0.611	0.612	0.612	0.612	0.612	0.611	0.611	0.611	0.611	0.61	0.61	0.61	0.61	0.61	0.609	0.609	0.609	0.608	0.608	0.607	0.607	0.606	0.606	0.606	0.605	0.605	0.604	0.604	0.604	0.603	0.603	0.602	0.602	0.602	0.602	0.601	0.601	0.601	0.6	0.6	0.6	0.6	0.6	0.6	0.6	0.6	0.599
0.608	0.609	0.61	0.611	0.612	0.612	0.612	0.612	0.611	0.611	0.611	0.611	0.61	0.61	0.61	0.61	0.609	0.609	0.609	0.608	0.608	0.608	0.607	0.607	0.606	0.606	0.606	0.605	0.605	0.604	0.604	0.603	0.603	0.603	0.602	0.602	0.602	0.602	0.601	0.601	0.601	0.6	0.6	0.6	0.6	0.6	0.6	0.6	0.599	0.599
0.608	0.609	0.61	0.611	0.612	0.612	0.612	0.612	0.611	0.611	0.611	0.611	0.61	0.61	0.61	0.61	0.609	0.609	0.609	0.608	0.608	0.608	0.607	0.607	0.606	0.606	0.606	0.605	0.605	0.604	0.604	0.603	0.603	0.603	0.602	0.602	0.602	0.601	0.601	0.601	0.601	0.6	0.6	0.6	0.6	0.6	0.6	0.6	0.599	0.599
0.608	0.609	0.61	0.611	0.612	0.612	0.612	0.612	0.611	0.611	0.611	0.611	0.61	0.61	0.61	0.61	0.609	0.609	0.609	0.608	0.608	0.608	0.607	0.607	0.606	0.606	0.605	0.605	0.605	0.604	0.604	0.603	0.603	0.603	0.602	0.602	0.602	0.601	0.601	0.601	0.601	0.6	0.6	0.6	0.6	0.6	0.6	0.6	0.599	0.599
0.608	0.609	0.611	0.611	0.612	0.612	0.612	0.612	0.612	0.611	0.611	0.611	0.61	0.61	0.61	0.61	0.609	0.609	0.609	0.608	0.608	0.608	0.607	0.607	0.606	0.606	0.605	0.605	0.605	0.604	0.604	0.603	0.603	0.603	0.602	0.602	0.602	0.601	0.601	0.601	0.601	0.6	0.6	0.6	0.6	0.6	0.6	0.6	0.599	0.599
0.609	0.61	0.611	0.612	0.612	0.612	0.612	0.612	0.612	0.611	0.611	0.611	0.611	0.61	0.61	0.61	0.609	0.609	0.609	0.608	0.608	0.608	0.607	0.607	0.606	0.606	0.605	0.605	0.605	0.604	0.604	0.603	0.603	0.603	0.602	0.602	0.602	0.601	0.601	0.601	0.601	0.6	0.6	0.6	0.6	0.6	0.6	0.6	0.599	0.599
0.609	0.61	0.611	0.612	0.612	0.613	0.613	0.612	0.612	0.612	0.611	0.611	0.611	0.61	0.61	0.61	0.609	0.609	0.609	0.608	0.608	0.608	0.607	0.607	0.606	0.606	0.605	0.605	0.605	0.604	0.604	0.603	0.603	0.603	0.602	0.602	0.602	0.602	0.601	0.601	0.601	0.601	0.6	0.6	0.6	0.6	0.6	0.6	0.599	0.599
0.609	0.611	0.612	0.612	0.613	0.613	0.613	0.613	0.612	0.612	0.611	0.611	0.611	0.611	0.61	0.61	0.61	0.609	0.609	0.608	0.608	0.608	0.607	0.607	0.606	0.606	0.605	0.605	0.605	0.604	0.604	0.603	0.603	0.603	0.602	0.602	0.602	0.602	0.601	0.601	0.601	0.601	0.6	0.6	0.6	0.6	0.6	0.6	0.599	0.599
0.61	0.611	0.612	0.613	0.613	0.613	0.613	0.613	0.612	0.612	0.612	0.611	0.611	0.611	0.61	0.61	0.61	0.609	0.609	0.608	0.608	0.608	0.607	0.607	0.606	0.606	0.605	0.605	0.605	0.604	0.604	0.603	0.603	0.603	0.602	0.602	0.602	0.602	0.601	0.601	0.601	0.601	0.6	0.6	0.6	0.6	0.6	0.6	0.6	0.599
0.611	0.612	0.613	0.613	0.613	0.613	0.613	0.613	0.612	0.612	0.612	0.611	0.611	0.611	0.61	0.61	0.61	0.609	0.609	0.608	0.608	0.608	0.607	0.607	0.606	0.606	0.605	0.605	0.605	0.604	0.604	0.603	0.603	0.603	0.602	0.602	0.602	0.602	0.601	0.601	0.601	0.601	0.6	0.6	0.6	0.6	0.6	0.6	0.6	0.6
0.612	0.613	0.613	0.614	0.614	0.614	0.613	0.613	0.613	0.612	0.612	0.611	0.611	0.611	0.61	0.61	0.61	0.609	0.609	0.608	0.608	0.608	0.607	0.607	0.606	0.606	0.605	0.605	0.605	0.604	0.604	0.603	0.603	0.603	0.602	0.602	0.602	0.602	0.601	0.601	0.601	0.601	0.601	0.6	0.6	0.6	0.6	0.6	0.6	0.6
0.613	0.614	0.614	0.614	0.614	0.614	0.614	0.613	0.613	0.612	0.612	0.612	0.611	0.611	0.61	0.61	0.61	0.609	0.609	0.608	0.608	0.608	0.607	0.607	0.606	0.606	0.605	0.605	0.604	0.604	0.604	0.603	0.603	0.603	0.602	0.602	0.602	0.602	0.601	0.601	0.601	0.601	0.601	0.6	0.6	0.6	0.6	0.6	0.6	0.6
0.614	0.615	0.615	0.615	0.615	0.614	0.614	0.613	0.613	0.612	0.612	0.612	0.611	0.611	0.61	0.61	0.61	0.609	0.609	0.608	0.608	0.608	0.607	0.607	0.606	0.606	0.605	0.605	0.604	0.604	0.604	0.603	0.603	0.603	0.602	0.602	0.602	0.602	0.601	0.601	0.601	0.601	0.601	0.6	0.6	0.6	0.6	0.6	0.6	0.6
0.616	0.616	0.616	0.616	0.615	0.615	0.614	0.614	0.613	0.612	0.612	0.612	0.611	0.611	0.61	0.61	0.61	0.609	0.609	0.608	0.608	0.607	0.607	0.607	0.606	0.606	0.605	0.605	0.604	0.604	0.603	0.603	0.603	0.603	0.602	0.602	0.602	0.602	0.601	0.601	0.601	0.601	0.601	0.601	0.6	0.6	0.6	0.6	0.6	0.6
0.618	0.618	0.617	0.617	0.616	0.615	0.615	0.614	0.613	0.613	0.612	0.612	0.611	0.611	0.61	0.61	0.609	0.609	0.609	0.608	0.608	0.607	0.607	0.606	0.606	0.606	0.605	0.605	0.604	0.604	0.603	0.603	0.603	0.603	0.602	0.602	0.602	0.602	0.602	0.601	0.601	0.601	0.601	0.601	0.601	0.6	0.6	0.6	0.6	0.6
0.619	0.619	0.618	0.618	0.617	0.616	0.615	0.614	0.613	0.613	0.612	0.612	0.611	0.611	0.61	0.61	0.609	0.609	0.608	0.608	0.608	0.607	0.607	0.606	0.606	0.605	0.605	0.604	0.604	0.604	0.603	0.603	0.603	0.602	0.602	0.602	0.602	0.602	0.602	0.601	0.601	0.601	0.601	0.601	0.601	0.6	0.6	0.6	0.6	0.6
0.621	0.62	0.619	0.618	0.617	0.616	0.615	0.614	0.613	0.613	0.612	0.612	0.611	0.611	0.61	0.61	0.609	0.609	0.608	0.608	0.607	0.607	0.607	0.606	0.606	0.605	0.605	0.604	0.604	0.603	0.603	0.603	0.603	0.602	0.602	0.602	0.602	0.602	0.602	0.601	0.601	0.601	0.601	0.601	0.601	0.6	0.6	0.6	0.6	0.6
0.622	0.621	0.62	0.619	0.617	0.616	0.615	0.614	0.613	0.613	0.612	0.612	0.611	0.611	0.61	0.61	0.609	0.609	0.608	0.608	0.607	0.607	0.606	0.606	0.606	0.605	0.605	0.604	0.604	0.603	0.603	0.603	0.602	0.602	0.602	0.602	0.602	0.602	0.601	0.601	0.601	0.601	0.601	0.601	0.601	0.601	0.6	0.6	0.6	0.6
0.622	0.621	0.62	0.619	0.618	0.616	0.615	0.614	0.613	0.613	0.612	0.612	0.611	0.611	0.61	0.609	0.609	0.608	0.608	0.608	0.607	0.607	0.606	0.606	0.605	0.605	0.604	0.604	0.604	0.603	0.603	0.603	0.602	0.602	0.602	0.602	0.602	0.602	0.601	0.601	0.601	0.601	0.601	0.601	0.601	0.601	0.6	0.6	0.6	0.6
0.623	0.621	0.62	0.619	0.618	0.616	0.615	0.614	0.613	0.613	0.612	0.612	0.611	0.61	0.61	0.609	0.609	0.608	0.608	0.607	0.607	0.607	0.606	0.606	0.605	0.605	0.604	0.604	0.603	0.603	0.603	0.602	0.602	0.602	0.602	0.602	0.602	0.602	0.601	0.601	0.601	0.601	0.601	0.601	0.601	0.601	0.6	0.6	0.6	0.6
0.622	0.621	0.62	0.619	0.617	0.616	0.615	0.614	0.613	0.613	0.612	0.611	0.611	0.61	0.61	0.609	0.609	0.608	0.608	0.607	0.607	0.606	0.606	0.606	0.605	0.605	0.604	0.604	0.603	0.603	0.603	0.602	0.602	0.602	0.602	0.602	0.602	0.602	0.601	0.601	0.601	0.601	0.601	0.601	0.601	0.601	0.6	0.6	0.6	0.6
0.622	0.621	0.62	0.618	0.617	0.616	0.615	0.614	0.613	0.613	0.612	0.611	0.611	0.61	0.61	0.609	0.609	0.608	0.608	0.607	0.607	0.606	0.606	0.605	0.605	0.605	0.604	0.604	0.603	0.603	0.602	0.602	0.602	0.602	0.602	0.602	0.602	0.602	0.601	0.601	0.601	0.601	0.601	0.601	0.601	0.601	0.6	0.6	0.6	0.6
0.622	0.621	0.619	0.618	0.617	0.616	0.615	0.614	0.613	0.612	0.612	0.611	0.611	0.61	0.609	0.609	0.608	0.608	0.607	0.607	0.607	0.606	0.606	0.605	0.605	0.604	0.604	0.604	0.603	0.603	0.602	0.602	0.602	0.602	0.602	0.602	0.602	0.601	0.601	0.601	0.601	0.601	0.601	0.601	0.601	0.601	0.6	0.6	0.6	0.6
0.621	0.62	0.619	0.618	0.616	0.615	0.614	0.614	0.613	0.612	0.612	0.611	0.611	0.61	0.609	0.609	0.608	0.608	0.607	0.607	0.606	0.606	0.606	0.605	0.605	0.604	0.604	0.603	0.603	0.603	0.602	0.602	0.602	0.602	0.602	0.602	0.602	0.601	0.601	0.601	0.601	0.601	0.601	0.601	0.601	0.601	0.6	0.6	0.6	0.6
0.621	0.62	0.618	0.617	0.616	0.615	0.614	0.613	0.613	0.612	0.612	0.611	0.61	0.61	0.609	0.609	0.608	0.608	0.607	0.607	0.606	0.606	0.605	0.605	0.605	0.604	0.604	0.603	0.603	0.603	0.602	0.602	0.602	0.602	0.602	0.602	0.602	0.601	0.601	0.601	0.601	0.601	0.601	0.601	0.601	0.601	0.601	0.6	0.6	0.6
0.62	0.619	0.618	0.617	0.616	0.615	0.614	0.613	0.613	0.612	0.611	0.611	0.61	0.61	0.609	0.609	0.608	0.607	0.607	0.607	0.606	0.606	0.605	0.605	0.605	0.604	0.604	0.603	0.603	0.602	0.602	0.602	0.602	0.602	0.602	0.602	0.602	0.601	0.601	0.601	0.601	0.601	0.601	0.601	0.601	0.601	0.601	0.6	0.6	0.6
0.619	0.619	0.618	0.617	0.616	0.615	0.614	0.613	0.612	0.612	0.611	0.611	0.61	0.61	0.609	0.608	0.608	0.607	0.607	0.606	0.606	0.606	0.605	0.605	0.604	0.604	0.604	0.603	0.603	0.602	0.602	0.602	0.602	0.602	0.602	0.602	0.601	0.601	0.601	0.601	0.601	0.601	0.601	0.601	0.601	0.601	0.601	0.6	0.6	0.6
0.619	0.618	0.617	0.616	0.616	0.615	0.614	0.613	0.612	0.612	0.611	0.611	0.61	0.61	0.609	0.608	0.608	0.607	0.607	0.606	0.606	0.606	0.605	0.605	0.604	0.604	0.603	0.603	0.603	0.602	0.602	0.602	0.602	0.602	0.601	0.601	0.601	0.601	0.601	0.601	0.601	0.601	0.601	0.601	0.601	0.601	0.601	0.6	0.6	0.6
0.619	0.618	0.617	0.616	0.615	0.615	0.614	0.613	0.612	0.612	0.611	0.611	0.61	0.61	0.609	0.608	0.608	0.607	0.607	0.606	0.606	0.605	0.605	0.605	0.604	0.604	0.603	0.603	0.603	0.602	0.602	0.602	0.602	0.601	0.601	0.601	0.601	0.601	0.601	0.601	0.601	0.601	0.601	0.601	0.601	0.601	0.601	0.6	0.6	0.6
0.618	0.618	0.617	0.616	0.615	0.615	0.614	0.613	0.613	0.612	0.611	0.611	0.61	0.61	0.609	0.608	0.608	0.607	0.607	0.606	0.606	0.605	0.605	0.605	0.604	0.604	0.603	0.603	0.602	0.602	0.602	0.602	0.601	0.601	0.601	0.601	0.601	0.601	0.601	0.601	0.601	0.601	0.601	0.601	0.601	0.601	0.601	0.6	0.6	0.6
0.618	0.618	0.617	0.616	0.615	0.615	0.614	0.613	0.613	0.612	0.611	0.611	0.61	0.61	0.609	0.608	0.608	0.607	0.607	0.606	0.606	0.605	0.605	0.605	0.604	0.604	0.603	0.603	0.602	0.602	0.602	0.602	0.601	0.601	0.601	0.601	0.601	0.601	0.601	0.601	0.601	0.601	0.601	0.601	0.601	0.601	0.6	0.6	0.6	0.6
0.618	0.618	0.617	0.616	0.616	0.615	0.614	0.613	0.613	0.612	0.611	0.611	0.61	0.61	0.609	0.608	0.608	0.607	0.607	0.606	0.606	0.605	0.605	0.605	0.604	0.604	0.603	0.603	0.602	0.602	0.602	0.602	0.601	0.601	0.601	0.601	0.601	0.601	0.601	0.601	0.601	0.601	0.601	0.601	0.601	0.601	0.6	0.6	0.6	0.6
0.618	0.618	0.617	0.616	0.616	0.615	0.614	0.613	0.613	0.612	0.611	0.611	0.61	0.61	0.609	0.608	0.608	0.607	0.607	0.606	0.606	0.605	0.605	0.605	0.604	0.604	0.603	0.603	0.603	0.602	0.602	0.602	0.602	0.601	0.601	0.601	0.601	0.601	0.601	0.601	0.601	0.601	0.601	0.601	0.601	0.601	0.6	0.6	0.6	0.6
0.618	0.618	0.617	0.616	0.616	0.615	0.614	0.613	0.613	0.612	0.611	0.611	0.61	0.61	0.609	0.608	0.608	0.607	0.607	0.606	0.606	0.605	0.605	0.605	0.604	0.604	0.603	0.603	0.603	0.602	0.602	0.602	0.602	0.602	0.601	0.601	0.601	0.601	0.601	0.601	0.601	0.601	0.601	0.601	0.601	0.601	0.6	0.6	0.6	0.6
0.618	0.618	0.617	0.617	0.616	0.615	0.614	0.614	0.613	0.612	0.611	0.611	0.61	0.61	0.609	0.608	0.608	0.607	0.607	0.606	0.606	0.606	0.605	0.605	0.604	0.604	0.604	0.603	0.603	0.602	0.602	0.602	0.602	0.602	0.602	0.602	0.602	0.601	0.601	0.601	0.601	0.601	0.601	0.601	0.601	0.601	0.6	0.6	0.6	0.6
0.618	0.618	0.617	0.617	0.616	0.615	0.614	0.614	0.613	0.612	0.612	0.611	0.61	0.61	0.609	0.608	0.608	0.607	0.607	0.606	0.606	0.606	0.605	0.605	0.605	0.604	0.604	0.603	0.603	0.603	0.602	0.602	0.602	0.602	0.602	0.602	0.602	0.602	0.601	0.601	0.601	0.601	0.601	0.601	0.601	0.601	0.6	0.6	0.6	0.6
0.619	0.618	0.618	0.617	0.616	0.615	0.615	0.614	0.613	0.612	0.612	0.611	0.61	0.61	0.609	0.609	0.608	0.607	0.607	0.607	0.606	0.606	0.605	0.605	0.605	0.604	0.604	0.603	0.603	0.603	0.602	0.602	0.602	0.602	0.602	0.602	0.602	0.602	0.601	0.601	0.601	0.601	0.601	0.601	0.601	0.601	0.6	0.6	0.6	0.6
0.619	0.618	0.618	0.617	0.616	0.616	0.615	0.614	0.613	0.612	0.612	0.611	0.61	0.61	0.609	0.609	0.608	0.608	0.607	0.607	0.606	0.606	0.606	0.605	0.605	0.604	0.604	0.604	0.603	0.603	0.603	0.602	0.602	0.602	0.602	0.602	0.602	0.602	0.602	0.601	0.601	0.601	0.601	0.601	0.601	0.601	0.6	0.6	0.6	0.6
0.619	0.619	0.618	0.617	0.617	0.616	0.615	0.614	0.613	0.612	0.612	0.611	0.61	0.61	0.609	0.609	0.608	0.608	0.607	0.607	0.606	0.606	0.606	0.605	0.605	0.605	0.604	0.604	0.603	0.603	0.603	0.602	0.602	0.602	0.602	0.602	0.602	0.602	0.602	0.601	0.601	0.601	0.601	0.601	0.601	0.601	0.6	0.6	0.6	0.6
0.619	0.619	0.618	0.618	0.617	0.616	0.615	0.614	0.613	0.612	0.612	0.611	0.61	0.61	0.609	0.609	0.608	0.608	0.607	0.607	0.606	0.606	0.606	0.605	0.605	0.605	0.604	0.604	0.603	0.603	0.603	0.603	0.602	0.602	0.602	0.602	0.602	0.602	0.602	0.602	0.601	0.601	0.601	0.601	0.601	0.601	0.6	0.6	0.6	0.6
0.619	0.619	0.618	0.618	0.617	0.616	0.615	0.614	0.613	0.612	0.612	0.611	0.611	0.61	0.609	0.609	0.608	0.608	0.607	0.607	0.607	0.606	0.606	0.605	0.605	0.605	0.604	0.604	0.604	0.603	0.603	0.603	0.603	0.602	0.602	0.602	0.602	0.602	0.602	0.602	0.601	0.601	0.601	0.601	0.601	0.601	0.6	0.6	0.6	0.6
0.62	0.619	0.619	0.618	0.617	0.616	0.615	0.614	0.613	0.612	0.612	0.611	0.611	0.61	0.609	0.609	0.608	0.608	0.607	0.607	0.607	0.606	0.606	0.606	0.605	0.605	0.604	0.604	0.604	0.603	0.603	0.603	0.603	0.603	0.602	0.602	0.602	0.602	0.602	0.602	0.601	0.601	0.601	0.601	0.601	0.601	0.6	0.6	0.6	0.6
0.62	0.619	0.619	0.618	0.617	0.616	0.615	0.614	0.613	0.612	0.612	0.611	0.611	0.61	0.609	0.609	0.608	0.608	0.608	0.607	0.607	0.606	0.606	0.606	0.605	0.605	0.605	0.604	0.604	0.603	0.603	0.603	0.603	0.603	0.602	0.602	0.602	0.602	0.602	0.602	0.601	0.601	0.601	0.601	0.601	0.601	0.6	0.6	0.6	0.6
0.62	0.62	0.619	0.618	0.617	0.616	0.615	0.614	0.613	0.612	0.612	0.611	0.611	0.61	0.609	0.609	0.608	0.608	0.608	0.607	0.607	0.606	0.606	0.606	0.605	0.605	0.605	0.604	0.604	0.604	0.603	0.603	0.603	0.603	0.603	0.602	0.602	0.602	0.602	0.602	0.601	0.601	0.601	0.601	0.601	0.601	0.6	0.6	0.6	0.6
0.62	0.619	0.619	0.618	0.617	0.616	0.615	0.614	0.613	0.612	0.612	0.611	0.611	0.61	0.61	0.609	0.609	0.608	0.608	0.607	0.607	0.606	0.606	0.606	0.605	0.605	0.605	0.604	0.604	0.604	0.603	0.603	0.603	0.603	0.603	0.602	0.602	0.602	0.602	0.602	0.601	0.601	0.601	0.601	0.601	0.601	0.6	0.6	0.6	0.6
0.62	0.619	0.619	0.618	0.617	0.616	0.615	0.614	0.613	0.612	0.612	0.611	0.611	0.61	0.61	0.609	0.609	0.608	0.608	0.607	0.607	0.607	0.606	0.606	0.605	0.605	0.605	0.604	0.604	0.604	0.603	0.603	0.603	0.603	0.603	0.602	0.602	0.602	0.602	0.602	0.601	0.601	0.601	0.601	0.601	0.601	0.6	0.6	0.6	0.6
0.619	0.619	0.619	0.618	0.617	0.616	0.615	0.614	0.613	0.612	0.612	0.611	0.611	0.61	0.61	0.609	0.609	0.608	0.608	0.607	0.607	0.607	0.606	0.606	0.606	0.605	0.605	0.605	0.604	0.604	0.604	0.603	0.603	0.603	0.603	0.603	0.602	0.602	0.602	0.602	0.602	0.601	0.601	0.601	0.601	0.601	0.6	0.6	0.6	0.6
0.618	0.618	0.618	0.618	0.617	0.616	0.615	0.614	0.613	0.612	0.612	0.611	0.611	0.61	0.61	0.609	0.609	0.608	0.608	0.607	0.607	0.607	0.606	0.606	0.606	0.605	0.605	0.605	0.604	0.604	0.604	0.603	0.603	0.603	0.603	0.603	0.602	0.602	0.602	0.602	0.602	0.601	0.601	0.601	0.601	0.601	0.6	0.6	0.6	0.6
0.618	0.618	0.618	0.617	0.617	0.616	0.615	0.614	0.613	0.612	0.612	0.611	0.611	0.61	0.61	0.609	0.609	0.608	0.608	0.608	0.607	0.607	0.607	0.606	0.606	0.605	0.605	0.605	0.604	0.604	0.604	0.603	0.603	0.603	0.603	0.603	0.602	0.602	0.602	0.602	0.602	0.601	0.601	0.601	0.601	0.6	0.6	0.6	0.6	0.6
0.617	0.617	0.617	0.617	0.616	0.616	0.615	0.614	0.613	0.612	0.612	0.611	0.611	0.61	0.61	0.609	0.609	0.608	0.608	0.608	0.607	0.607	0.607	0.606	0.606	0.606	0.605	0.605	0.604	0.604	0.604	0.604	0.603	0.603	0.603	0.603	0.603	0.602	0.602	0.602	0.602	0.601	0.601	0.601	0.601	0.6	0.6	0.6	0.6	0.6
0.616	0.617	0.617	0.617	0.616	0.616	0.615	0.614	0.613	0.612	0.612	0.611	0.611	0.61	0.61	0.609	0.609	0.608	0.608	0.608	0.607	0.607	0.607	0.606	0.606	0.606	0.605	0.605	0.605	0.604	0.604	0.604	0.603	0.603	0.603	0.603	0.603	0.602	0.602	0.602	0.602	0.601	0.601	0.601	0.601	0.6	0.6	0.6	0.6	0.599
0.616	0.616	0.616	0.616	0.616	0.615	0.615	0.614	0.613	0.612	0.612	0.611	0.611	0.61	0.61	0.609	0.609	0.608	0.608	0.608	0.607	0.607	0.607	0.606	0.606	0.606	0.605	0.605	0.605	0.604	0.604	0.604	0.604	0.603	0.603	0.603	0.603	0.602	0.602	0.602	0.602	0.601	0.601	0.601	0.601	0.6	0.6	0.6	0.6	0.599
0.615	0.616	0.616	0.616	0.616	0.615	0.614	0.614	0.613	0.612	0.612	0.611	0.611	0.61	0.61	0.609	0.609	0.608	0.608	0.608	0.608	0.607	0.607	0.607	0.606	0.606	0.605	0.605	0.605	0.604	0.604	0.604	0.604	0.603	0.603	0.603	0.603	0.603	0.602	0.602	0.602	0.601	0.601	0.601	0.601	0.6	0.6	0.6	0.6	0.599
0.615	0.616	0.616	0.616	0.616	0.615	0.614	0.614	0.613	0.612	0.612	0.611	0.611	0.61	0.61	0.609	0.609	0.608	0.608	0.608	0.608	0.607	0.607	0.607	0.606	0.606	0.606	0.605	0.605	0.604	0.604	0.604	0.604	0.604	0.603	0.603	0.603	0.603	0.602	0.602	0.602	0.601	0.601	0.601	0.601	0.6	0.6	0.6	0.6	0.599
0.615	0.616	0.616	0.616	0.616	0.615	0.614	0.614	0.613	0.612	0.612	0.611	0.611	0.61	0.61	0.609	0.609	0.608	0.608	0.608	0.608	0.607	0.607	0.607	0.606	0.606	0.606	0.605	0.605	0.605	0.604	0.604	0.604	0.604	0.603	0.603	0.603	0.603	0.602	0.602	0.602	0.602	0.601	0.601	0.601	0.6	0.6	0.6	0.6	0.599
0.615	0.616	0.616	0.616	0.616	0.615	0.614	0.614	0.613	0.612	0.612	0.611	0.611	0.61	0.61	0.609	0.609	0.608	0.608	0.608	0.608	0.607	0.607	0.607	0.606	0.606	0.606	0.605	0.605	0.605	0.604	0.604	0.604	0.604	0.603	0.603	0.603	0.603	0.602	0.602	0.602	0.602	0.601	0.601	0.601	0.6	0.6	0.6	0.6	0.599
0.616	0.616	0.616	0.616	0.616	0.615	0.614	0.614	0.613	0.612	0.612	0.611	0.611	0.61	0.61	0.609	0.609	0.609	0.608	0.608	0.608	0.607	0.607	0.607	0.606	0.606	0.606	0.605	0.605	0.605	0.604	0.604	0.604	0.604	0.604	0.603	0.603	0.603	0.603	0.602	0.602	0.602	0.601	0.601	0.601	0.601	0.6	0.6	0.599	0.599
0.616	0.616	0.616	0.616	0.616	0.615	0.614	0.614	0.613	0.612	0.612	0.611	0.611	0.61	0.61	0.609	0.609	0.609	0.608	0.608	0.608	0.607	0.607	0.607	0.606	0.606	0.606	0.605	0.605	0.605	0.604	0.604	0.604	0.604	0.604	0.603	0.603	0.603	0.603	0.602	0.602	0.602	0.601	0.601	0.601	0.601	0.6	0.6	0.599	0.599
0.616	0.616	0.616	0.616	0.616	0.615	0.614	0.614	0.613	0.612	0.612	0.611	0.611	0.61	0.61	0.609	0.609	0.609	0.608	0.608	0.608	0.608	0.607	0.607	0.607	0.606	0.606	0.605	0.605	0.605	0.604	0.604	0.604	0.604	0.604	0.604	0.603	0.603	0.603	0.602	0.602	0.602	0.601	0.601	0.601	0.601	0.6	0.6	0.599	0.599
0.616	0.617	0.617	0.616	0.616	0.615	0.614	0.614	0.613	0.612	0.612	0.611	0.611	0.61	0.61	0.609	0.609	0.609	0.608	0.608	0.608	0.608	0.607	0.607	0.607	0.606	0.606	0.606	0.605	0.605	0.605	0.604	0.604	0.604	0.604	0.604	0.603	0.603	0.603	0.602	0.602	0.602	0.601	0.601	0.601	0.601	0.6	0.6	0.599	0.599
0.617	0.617	0.617	0.616	0.616	0.615	0.614	0.614	0.613	0.612	0.612	0.611	0.611	0.61	0.61	0.609	0.609	0.609	0.609	0.608	0.608	0.608	0.607	0.607	0.607	0.606	0.606	0.606	0.605	0.605	0.605	0.604	0.604	0.604	0.604	0.604	0.603	0.603	0.603	0.602	0.602	0.602	0.601	0.601	0.601	0.601	0.6	0.6	0.599	0.599
0.617	0.617	0.617	0.616	0.616	0.615	0.614	0.614	0.613	0.612	0.612	0.611	0.611	0.61	0.61	0.61	0.609	0.609	0.609	0.608	0.608	0.608	0.608	0.607	0.607	0.606	0.606	0.606	0.605	0.605	0.605	0.604	0.604	0.604	0.604	0.604	0.603	0.603	0.603	0.602	0.602	0.602	0.601	0.601	0.601	0.601	0.6	0.6	0.599	0.599
0.617	0.617	0.617	0.616	0.616	0.615	0.614	0.614	0.613	0.612	0.612	0.611	0.611	0.61	0.61	0.61	0.609	0.609	0.609	0.609	0.608	0.608	0.608	0.607	0.607	0.607	0.606	0.606	0.605	0.605	0.605	0.605	0.604	0.604	0.604	0.604	0.603	0.603	0.603	0.602	0.602	0.602	0.601	0.601	0.601	0.6	0.6	0.6	0.599	0.599
0.617	0.617	0.617	0.616	0.616	0.615	0.614	0.614	0.613	0.613	0.612	0.612	0.611	0.611	0.61	0.61	0.609	0.609	0.609	0.609	0.608	0.608	0.608	0.608	0.607	0.607	0.606	0.606	0.606	0.605	0.605	0.605	0.604	0.604	0.604	0.604	0.604	0.603	0.603	0.603	0.602	0.602	0.601	0.601	0.601	0.6	0.6	0.6	0.599	0.598
0.617	0.617	0.617	0.616	0.616	0.615	0.614	0.614	0.613	0.613	0.612	0.612	0.611	0.611	0.61	0.61	0.61	0.609	0.609	0.609	0.609	0.608	0.608	0.608	0.607	0.607	0.606	0.606	0.606	0.605	0.605	0.605	0.605	0.604	0.604	0.604	0.604	0.603	0.603	0.603	0.602	0.602	0.601	0.601	0.601	0.6	0.6	0.6	0.599	0.598
0.618	0.618	0.617	0.617	0.616	0.615	0.614	0.614	0.613	0.613	0.612	0.612	0.611	0.611	0.61	0.61	0.61	0.609	0.609	0.609	0.609	0.608	0.608	0.608	0.607	0.607	0.607	0.606	0.606	0.605	0.605	0.605	0.605	0.604	0.604	0.604	0.604	0.603	0.603	0.603	0.602	0.602	0.602	0.601	0.601	0.6	0.6	0.599	0.599	0.598
0.618	0.618	0.617	0.617	0.616	0.615	0.615	0.614	0.613	0.613	0.612	0.612	0.611	0.611	0.61	0.61	0.61	0.609	0.609	0.609	0.609	0.609	0.608	0.608	0.608	0.607	0.607	0.606	0.606	0.606	0.605	0.605	0.605	0.605	0.604	0.604	0.604	0.603	0.603	0.603	0.602	0.602	0.602	0.601	0.601	0.6	0.6	0.599	0.599	0.598
0.619	0.618	0.618	0.617	0.616	0.615	0.615	0.614	0.613	0.613	0.612	0.612	0.611	0.611	0.61	0.61	0.61	0.61	0.609	0.609	0.609	0.609	0.608	0.608	0.608	0.607	0.607	0.606	0.606	0.606	0.605	0.605	0.605	0.605	0.604	0.604	0.604	0.603	0.603	0.603	0.602	0.602	0.602	0.601	0.601	0.6	0.6	0.599	0.599	0.598
0.62	0.619	0.618	0.617	0.616	0.616	0.615	0.614	0.614	0.613	0.612	0.612	0.611	0.611	0.611	0.61	0.61	0.61	0.609	0.609	0.609	0.609	0.608	0.608	0.608	0.607	0.607	0.606	0.606	0.606	0.605	0.605	0.605	0.605	0.605	0.604	0.604	0.603	0.603	0.603	0.602	0.602	0.601	0.601	0.601	0.6	0.6	0.599	0.598	0.598
0.62	0.62	0.619	0.618	0.617	0.616	0.615	0.614	0.614	0.613	0.612	0.612	0.612	0.611	0.611	0.61	0.61	0.61	0.61	0.609	0.609	0.609	0.609	0.608	0.608	0.607	0.607	0.607	0.606	0.606	0.605	0.605	0.605	0.605	0.605	0.604	0.604	0.604	0.603	0.603	0.602	0.602	0.601	0.601	0.601	0.6	0.6	0.599	0.598	0.597
0.621	0.62	0.619	0.618	0.617	0.616	0.615	0.614	0.614	0.613	0.613	0.612	0.612	0.611	0.611	0.61	0.61	0.61	0.61	0.609	0.609	0.609	0.609	0.608	0.608	0.608	0.607	0.607	0.606	0.606	0.606	0.605	0.605	0.605	0.605	0.604	0.604	0.603	0.603	0.603	0.602	0.602	0.601	0.601	0.6	0.6	0.599	0.599	0.598	0.597
0.621	0.62	0.619	0.618	0.617	0.616	0.615	0.614	0.614	0.613	0.613	0.612	0.612	0.611	0.611	0.61	0.61	0.61	0.61	0.61	0.609	0.609	0.609	0.608	0.608	0.608	0.607	0.607	0.606	0.606	0.606	0.605	0.605	0.605	0.605	0.604	0.604	0.603	0.603	0.603	0.602	0.602	0.601	0.601	0.6	0.6	0.599	0.598	0.597	0.596
0.622	0.621	0.62	0.618	0.617	0.616	0.615	0.614	0.614	0.613	0.613	0.612	0.612	0.611	0.611	0.611	0.61	0.61	0.61	0.61	0.609	0.609	0.609	0.608	0.608	0.608	0.607	0.607	0.606	0.606	0.606	0.605	0.605	0.605	0.605	0.604	0.604	0.603	0.603	0.602	0.602	0.602	0.601	0.601	0.6	0.599	0.599	0.598	0.597	0.596
0.622	0.621	0.62	0.618	0.617	0.616	0.615	0.614	0.614	0.613	0.613	0.612	0.612	0.611	0.611	0.611	0.61	0.61	0.61	0.61	0.61	0.609	0.609	0.609	0.608	0.608	0.607	0.607	0.606	0.606	0.606	0.605	0.605	0.605	0.605	0.604	0.604	0.603	0.603	0.602	0.602	0.601	0.601	0.6	0.6	0.599	0.598	0.597	0.596	0.595
0.622	0.621	0.62	0.618	0.617	0.616	0.615	0.614	0.614	0.613	0.613	0.612	0.612	0.611	0.611	0.611	0.61	0.61	0.61	0.61	0.61	0.609	0.609	0.609	0.608	0.608	0.607	0.607	0.607	0.606	0.606	0.605	0.605	0.605	0.605	0.604	0.604	0.603	0.603	0.602	0.602	0.601	0.601	0.6	0.599	0.599	0.598	0.597	0.596	0.594
0.622	0.621	0.62	0.618	0.617	0.616	0.615	0.614	0.614	0.613	0.613	0.612	0.612	0.611	0.611	0.611	0.611	0.61	0.61	0.61	0.61	0.609	0.609	0.609	0.608	0.608	0.607	0.607	0.607	0.606	0.606	0.605	0.605	0.605	0.604	0.604	0.604	0.603	0.603	0.602	0.601	0.601	0.6	0.6	0.599	0.598	0.597	0.596	0.595	0.594
0.622	0.621	0.62	0.618	0.617	0.616	0.615	0.615	0.614	0.613	0.613	0.612	0.612	0.612	0.611	0.611	0.611	0.61	0.61	0.61	0.61	0.609	0.609	0.609	0.608	0.608	0.608	0.607	0.607	0.606	0.606	0.605	0.605	0.605	0.604	0.604	0.604	0.603	0.602	0.602	0.601	0.601	0.6	0.599	0.599	0.598	0.597	0.596	0.594	0.593
0.622	0.621	0.619	0.618	0.617	0.616	0.615	0.615	0.614	0.613	0.613	0.613	0.612	0.612	0.611	0.611	0.611	0.61	0.61	0.61	0.61	0.61	0.609	0.609	0.608	0.608	0.608	0.607	0.607	0.606	0.606	0.605	0.605	0.605	0.604	0.604	0.603	0.603	0.602	0.602	0.601	0.6	0.6	0.599	0.598	0.597	0.596	0.595	0.594	0.592
0.622	0.621	0.62	0.618	0.617	0.616	0.615	0.615	0.614	0.614	0.613	0.613	0.612	0.612	0.611	0.611	0.611	0.611	0.61	0.61	0.61	0.61	0.609	0.609	0.609	0.608	0.608	0.607	0.607	0.606	0.606	0.605	0.605	0.605	0.604	0.604	0.603	0.603	0.602	0.602	0.601	0.6	0.599	0.599	0.598	0.597	0.596	0.594	0.593	0.592
0.622	0.621	0.62	0.619	0.617	0.616	0.616	0.615	0.614	0.614	0.613	0.613	0.612	0.612	0.611	0.611	0.611	0.611	0.61	0.61	0.61	0.61	0.609	0.609	0.609	0.608	0.608	0.607	0.607	0.606	0.606	0.605	0.605	0.605	0.604	0.604	0.603	0.603	0.602	0.601	0.601	0.6	0.599	0.598	0.597	0.596	0.595	0.594	0.592	0.591
0.622	0.621	0.62	0.619	0.618	0.617	0.616	0.615	0.614	0.614	0.613	0.613	0.612	0.612	0.612	0.611	0.611	0.611	0.61	0.61	0.61	0.61	0.609	0.609	0.609	0.608	0.608	0.607	0.607	0.606	0.606	0.605	0.605	0.605	0.604	0.604	0.603	0.603	0.602	0.601	0.6	0.6	0.599	0.598	0.597	0.596	0.594	0.593	0.592	0.59
0.622	0.621	0.62	0.619	0.618	0.617	0.616	0.615	0.614	0.614	0.613	0.613	0.612	0.612	0.612	0.611	0.611	0.611	0.611	0.61	0.61	0.61	0.609	0.609	0.609	0.608	0.608	0.607	0.607	0.606	0.606	0.605	0.605	0.605	0.604	0.604	0.603	0.602	0.602	0.601	0.6	0.599	0.598	0.597	0.596	0.595	0.594	0.592	0.591	0.589
0.622	0.622	0.621	0.62	0.618	0.617	0.616	0.615	0.615	0.614	0.613	0.613	0.613	0.612	0.612	0.611	0.611	0.611	0.611	0.61	0.61	0.61	0.61	0.609	0.609	0.608	0.608	0.607	0.607	0.606	0.606	0.605	0.605	0.605	0.604	0.604	0.603	0.602	0.602	0.601	0.6	0.599	0.598	0.597	0.596	0.594	0.593	0.591	0.59	0.588
0.623	0.622	0.621	0.62	0.619	0.618	0.616	0.616	0.615	0.614	0.614	0.613	0.613	0.612	0.612	0.611	0.611	0.611	0.611	0.61	0.61	0.61	0.61	0.609	0.609	0.608	0.608	0.607	0.607	0.606	0.606	0.605	0.605	0.605	0.604	0.603	0.603	0.602	0.601	0.601	0.6	0.599	0.598	0.596	0.595	0.594	0.592	0.591	0.589	0.587
0.623	0.623	0.622	0.62	0.619	0.618	0.617	0.616	0.615	0.614	0.614	0.613	0.613	0.612	0.612	0.612	0.611	0.611	0.611	0.611	0.61	0.61	0.61	0.609	0.609	0.608	0.608	0.607	0.607	0.606	0.606	0.606	0.605	0.605	0.604	0.603	0.603	0.602	0.601	0.6	0.599	0.598	0.597	0.596	0.594	0.593	0.591	0.59	0.588	0.586
0.624	0.623	0.622	0.621	0.62	0.618	0.617	0.616	0.615	0.614	0.614	0.613	0.613	0.612	0.612	0.612	0.611	0.611	0.611	0.611	0.61	0.61	0.61	0.609	0.609	0.609	0.608	0.608	0.607	0.606	0.606	0.606	0.605	0.604	0.604	0.603	0.603	0.602	0.601	0.6	0.599	0.598	0.597	0.595	0.594	0.592	0.59	0.589	0.587	0.585
0.625	0.624	0.623	0.621	0.62	0.619	0.617	0.616	0.615	0.615	0.614	0.613	0.613	0.613	0.612	0.612	0.611	0.611	0.611	0.611	0.61	0.61	0.61	0.609	0.609	0.609	0.608	0.608	0.607	0.607	0.606	0.605	0.605	0.604	0.604	0.603	0.603	0.602	0.601	0.6	0.599	0.597	0.596	0.595	0.593	0.591	0.59	0.588	0.586	0.584
0.625	0.625	0.623	0.622	0.62	0.619	0.618	0.616	0.615	0.615	0.614	0.614	0.613	0.613	0.612	0.612	0.612	0.611	0.611	0.611	0.611	0.61	0.61	0.61	0.609	0.609	0.608	0.608	0.607	0.607	0.606	0.605	0.605	0.604	0.604	0.603	0.602	0.602	0.601	0.599	0.598	0.597	0.596	0.594	0.592	0.591	0.589	0.587	0.585	0.583
0.626	0.625	0.624	0.622	0.621	0.619	0.618	0.617	0.616	0.615	0.614	0.614	0.613	0.613	0.612	0.612	0.612	0.611	0.611	0.611	0.611	0.61	0.61	0.61	0.609	0.609	0.608	0.608	0.607	0.607	0.606	0.605	0.605	0.604	0.604	0.603	0.602	0.601	0.6	0.599	0.598	0.597	0.595	0.593	0.592	0.59	0.588	0.586	0.584	0.582
0.627	0.626	0.624	0.623	0.621	0.62	0.618	0.617	0.616	0.615	0.614	0.614	0.613	0.613	0.612	0.612	0.612	0.611	0.611	0.611	0.611	0.61	0.61	0.61	0.609	0.609	0.608	0.608	0.607	0.607	0.606	0.605	0.605	0.604	0.604	0.603	0.602	0.601	0.6	0.599	0.598	0.596	0.595	0.593	0.591	0.589	0.587	0.585	0.583	0.581
0.627	0.626	0.625	0.623	0.621	0.62	0.618	0.617	0.616	0.615	0.614	0.614	0.613	0.613	0.613	0.612	0.612	0.612	0.611	0.611	0.611	0.61	0.61	0.61	0.609	0.609	0.608	0.608	0.607	0.607	0.606	0.606	0.605	0.604	0.604	0.603	0.602	0.601	0.6	0.599	0.597	0.596	0.594	0.592	0.59	0.588	0.586	0.584	0.582	0.58
0.627	0.626	0.625	0.623	0.622	0.62	0.618	0.617	0.616	0.615	0.615	0.614	0.614	0.613	0.613	0.612	0.612	0.612	0.611	0.611	0.611	0.611	0.61	0.61	0.609	0.609	0.608	0.608	0.607	0.607	0.606	0.606	0.605	0.604	0.604	0.603	0.602	0.601	0.6	0.598	0.597	0.595	0.594	0.592	0.59	0.588	0.586	0.584	0.581	0.579
0.627	0.627	0.625	0.624	0.622	0.62	0.619	0.617	0.616	0.615	0.615	0.614	0.614	0.613	0.613	0.612	0.612	0.612	0.612	0.611	0.611	0.611	0.61	0.61	0.609	0.609	0.608	0.608	0.607	0.607	0.606	0.606	0.605	0.604	0.604	0.603	0.602	0.601	0.599	0.598	0.597	0.595	0.593	0.591	0.589	0.587	0.585	0.583	0.581	0.578
0.628	0.627	0.625	0.624	0.622	0.62	0.619	0.617	0.616	0.616	0.615	0.614	0.614	0.613	0.613	0.613	0.612	0.612	0.612	0.611	0.611	0.611	0.61	0.61	0.61	0.609	0.609	0.608	0.607	0.607	0.606	0.606	0.605	0.604	0.604	0.603	0.602	0.601	0.599	0.598	0.596	0.595	0.593	0.591	0.589	0.587	0.585	0.582	0.58	0.578
0.628	0.627	0.626	0.624	0.622	0.62	0.619	0.618	0.616	0.616	0.615	0.615	0.614	0.614	0.613	0.613	0.612	0.612	0.612	0.611	0.611	0.611	0.61	0.61	0.61	0.609	0.609	0.608	0.607	0.607	0.606	0.606	0.605	0.604	0.604	0.603	0.602	0.6	0.599	0.598	0.596	0.594	0.592	0.59	0.588	0.586	0.584	0.582	0.579	0.577
0.628	0.627	0.626	0.624	0.622	0.62	0.619	0.618	0.617	0.616	0.615	0.615	0.614	0.614	0.613	0.613	0.612	0.612	0.612	0.611	0.611	0.611	0.611	0.61	0.61	0.609	0.609	0.608	0.607	0.607	0.606	0.606	0.605	0.604	0.604	0.603	0.602	0.6	0.599	0.598	0.596	0.594	0.592	0.59	0.588	0.586	0.583	0.581	0.579	0.576
0.629	0.628	0.626	0.624	0.622	0.62	0.619	0.618	0.617	0.616	0.615	0.615	0.614	0.614	0.613	0.613	0.612	0.612	0.612	0.612	0.611	0.611	0.611	0.61	0.61	0.609	0.609	0.608	0.608	0.607	0.606	0.606	0.605	0.604	0.604	0.603	0.602	0.6	0.599	0.597	0.596	0.594	0.592	0.59	0.588	0.585	0.583	0.58	0.578	0.575
0.629	0.628	0.626	0.624	0.622	0.62	0.619	0.618	0.617	0.616	0.615	0.615	0.614	0.614	0.613	0.613	0.613	0.612	0.612	0.612	0.611	0.611	0.611	0.61	0.61	0.609	0.609	0.608	0.608	0.607	0.606	0.606	0.605	0.604	0.604	0.603	0.601	0.6	0.599	0.597	0.595	0.593	0.591	0.589	0.587	0.585	0.582	0.58	0.577	0.574
0.629	0.628	0.626	0.624	0.622	0.62	0.619	0.618	0.617	0.616	0.615	0.615	0.614	0.614	0.613	0.613	0.613	0.612	0.612	0.612	0.611	0.611	0.611	0.61	0.61	0.609	0.609	0.608	0.608	0.607	0.607	0.606	0.605	0.604	0.604	0.603	0.601	0.6	0.599	0.597	0.595	0.593	0.591	0.589	0.587	0.584	0.582	0.579	0.576	0.573
0.629	0.628	0.626	0.624	0.622	0.62	0.619	0.618	0.617	0.616	0.615	0.615	0.614	0.614	0.613	0.613	0.613	0.612	0.612	0.612	0.612	0.611	0.611	0.611	0.61	0.61	0.609	0.608	0.608	0.607	0.607	0.606	0.605	0.604	0.604	0.603	0.601	0.6	0.598	0.597	0.595	0.593	0.591	0.588	0.586	0.584	0.581	0.578	0.576	0.572
0.629	0.627	0.626	0.624	0.622	0.62	0.619	0.617	0.617	0.616	0.615	0.615	0.614	0.614	0.614	0.613	0.613	0.612	0.612	0.612	0.612	0.611	0.611	0.611	0.61	0.61	0.609	0.609	0.608	0.607	0.607	0.606	0.605	0.605	0.604	0.603	0.601	0.6	0.598	0.596	0.595	0.592	0.59	0.588	0.586	0.583	0.581	0.578	0.575	0.572
0.628	0.627	0.625	0.623	0.621	0.62	0.618	0.617	0.617	0.616	0.615	0.615	0.615	0.614	0.614	0.613	0.613	0.612	0.612	0.612	0.612	0.611	0.611	0.611	0.61	0.61	0.609	0.609	0.608	0.607	0.607	0.606	0.605	0.605	0.604	0.602	0.601	0.6	0.598	0.596	0.594	0.592	0.59	0.588	0.585	0.583	0.58	0.577	0.574	0.571
0.627	0.626	0.624	0.623	0.621	0.619	0.618	0.617	0.616	0.616	0.615	0.615	0.615	0.614	0.614	0.613	0.613	0.612	0.612	0.612	0.612	0.611	0.611	0.611	0.61	0.61	0.609	0.609	0.608	0.607	0.607	0.606	0.605	0.605	0.604	0.602	0.601	0.599	0.598	0.596	0.594	0.592	0.59	0.587	0.585	0.582	0.58	0.577	0.573	0.57
0.626	0.625	0.624	0.622	0.621	0.619	0.618	0.617	0.616	0.616	0.615	0.615	0.615	0.614	0.614	0.613	0.613	0.612	0.612	0.612	0.612	0.611	0.611	0.611	0.61	0.61	0.609	0.609	0.608	0.607	0.607	0.606	0.605	0.604	0.603	0.602	0.601	0.599	0.598	0.596	0.594	0.592	0.589	0.587	0.584	0.582	0.579	0.576	0.573	0.569911
0.625	0.624	0.623	0.622	0.62	0.619	0.618	0.617	0.616	0.616	0.615	0.615	0.614	0.614	0.614	0.613	0.613	0.612	0.612	0.612	0.612	0.611	0.611	0.611	0.61	0.61	0.609	0.609	0.608	0.607	0.607	0.606	0.605	0.604	0.603	0.602	0.601	0.599	0.597	0.595	0.593	0.591	0.589	0.587	0.584	0.582	0.579	0.576	0.572	0.569334
0.625	0.624	0.622	0.621	0.62	0.619	0.618	0.617	0.616	0.616	0.615	0.615	0.614	0.614	0.613	0.613	0.613	0.612	0.612	0.612	0.612	0.611	0.611	0.611	0.61	0.61	0.609	0.609	0.608	0.608	0.607	0.606	0.605	0.604	0.603	0.602	0.601	0.599	0.597	0.595	0.593	0.591	0.589	0.586	0.584	0.581	0.578	0.575	0.572	0.568801
0.624	0.623	0.622	0.621	0.619	0.618	0.617	0.617	0.616	0.616	0.615	0.615	0.614	0.614	0.613	0.613	0.613	0.612	0.612	0.612	0.612	0.611	0.611	0.611	0.61	0.61	0.609	0.609	0.608	0.608	0.607	0.606	0.605	0.604	0.603	0.602	0.601	0.599	0.597	0.595	0.593	0.591	0.589	0.586	0.584	0.581	0.578	0.575	0.572	0.56827
0.623	0.622	0.621	0.62	0.619	0.618	0.617	0.617	0.616	0.616	0.615	0.615	0.614	0.614	0.613	0.613	0.613	0.612	0.612	0.612	0.612	0.611	0.611	0.611	0.61	0.61	0.609	0.609	0.608	0.608	0.607	0.606	0.605	0.604	0.603	0.602	0.6	0.599	0.597	0.595	0.593	0.591	0.589	0.586	0.584	0.581	0.578	0.575	0.571	0.567757
0.622	0.622	0.621	0.62	0.619	0.618	0.617	0.616	0.616	0.616	0.615	0.615	0.614	0.614	0.613	0.613	0.613	0.612	0.612	0.612	0.612	0.611	0.611	0.611	0.61	0.61	0.609	0.609	0.608	0.608	0.607	0.606	0.605	0.604	0.603	0.602	0.6	0.599	0.597	0.595	0.593	0.591	0.588	0.586	0.583	0.581	0.578	0.574	0.571	0.567239
0.621	0.62	0.62	0.619	0.618	0.617	0.617	0.616	0.616	0.615	0.615	0.615	0.614	0.614	0.613	0.613	0.613	0.612	0.612	0.612	0.612	0.611	0.611	0.611	0.61	0.61	0.609	0.609	0.608	0.608	0.607	0.606	0.605	0.604	0.603	0.602	0.6	0.599	0.597	0.595	0.593	0.591	0.588	0.586	0.583	0.58	0.577	0.574	0.57	0.566681
0.619	0.619	0.619	0.618	0.617	0.617	0.616	0.616	0.616	0.615	0.615	0.615	0.614	0.614	0.613	0.613	0.612	0.612	0.612	0.612	0.612	0.611	0.611	0.611	0.61	0.61	0.609	0.609	0.608	0.608	0.607	0.606	0.606	0.605	0.603	0.602	0.6	0.599	0.597	0.595	0.593	0.59	0.588	0.586	0.583	0.58	0.577	0.574	0.57	0.566042
0.617	0.617	0.617	0.617	0.617	0.616	0.616	0.616	0.615	0.615	0.615	0.615	0.614	0.614	0.613	0.613	0.612	0.612	0.612	0.612	0.612	0.611	0.611	0.611	0.61	0.61	0.61	0.609	0.608	0.608	0.607	0.606	0.606	0.605	0.603	0.602	0.6	0.598	0.597	0.595	0.592	0.59	0.588	0.585	0.583	0.58	0.577	0.573	0.569613	0.565276
NaN	NaN	NaN	NaN	NaN	NaN	NaN	NaN	0.615	0.615	0.615	0.614	0.614	0.614	0.613	0.613	0.612	0.612	0.612	0.612	0.612	0.611	0.611	0.611	0.61	0.61	0.61	0.609	0.609	0.608	0.607	0.607	0.606	0.605	0.603	0.602	0.6	0.598	0.596	0.594	0.592	0.59	0.588	0.585	0.582	0.579	0.576	0.572	0.568786	0.564324
NaN	NaN	NaN	NaN	NaN	NaN	NaN	NaN	0.615	0.615	0.615	0.614	0.614	0.613	0.613	0.613	0.612	0.612	0.612	0.612	0.612	0.611	0.611	0.611	0.611	0.61	0.61	0.609	0.609	0.608	0.607	0.607	0.606	0.605	0.603	0.602	0.6	0.598	0.596	0.594	0.592	0.59	0.587	0.585	0.582	0.579	0.575	0.571	0.567785	0.563207
NaN	NaN	NaN	NaN	NaN	NaN	NaN	NaN	0.615	0.615	0.614	0.614	0.614	0.613	0.613	0.613	0.612	0.612	0.612	0.612	0.612	0.611	0.611	0.611	0.611	0.61	0.61	0.609	0.609	0.608	0.607	0.607	0.606	0.604	0.603	0.602	0.6	0.598	0.596	0.593	0.591	0.589	0.586	0.584	0.581	0.578	0.574	0.57	0.566561	0.56188
NaN	NaN	NaN	NaN	NaN	NaN	NaN	NaN	0.614	0.615	0.614	0.614	0.614	0.613	0.613	0.612	0.612	0.612	0.612	0.612	0.612	0.611	0.611	0.611	0.611	0.61	0.61	0.609	0.609	0.608	0.607	0.606	0.605	0.604	0.603	0.601	0.599	0.597	0.595	0.593	0.59	0.588	0.586	0.583	0.58	0.577	0.573	0.569634	0.565253	0.56052
NaN	NaN	NaN	NaN	NaN	NaN	NaN	NaN	0.614	0.614	0.614	0.614	0.613	0.613	0.612	0.612	0.612	0.612	0.612	0.611	0.611	0.611	0.611	0.611	0.61	0.61	0.61	0.609	0.608	0.608	0.607	0.606	0.605	0.604	0.602	0.601	0.599	0.597	0.594	0.592	0.59	0.587	0.585	0.582	0.579	0.575	0.572	0.568294	0.563866	0.559112
NaN	NaN	NaN	NaN	NaN	NaN	NaN	NaN	NaN	NaN	NaN	NaN	NaN	0.613	0.612	0.612	0.612	0.612	0.611	0.611	0.611	0.611	0.611	0.611	0.61	0.61	0.609	0.609	0.608	0.607	0.607	0.606	0.605	0.603	0.602	0.6	0.598	0.595	0.593	0.591	0.588	0.586	0.583	0.58	0.577	0.573	0.57	NaN	NaN	NaN
NaN	NaN	NaN	NaN	NaN	NaN	NaN	NaN	NaN	NaN	NaN	NaN	NaN	NaN	NaN	NaN	NaN	NaN	NaN	NaN	NaN	NaN	NaN	NaN	NaN	NaN	NaN	NaN	NaN	NaN	NaN	NaN	NaN	NaN	NaN	NaN	NaN	NaN	NaN	NaN	NaN	NaN	NaN	NaN	NaN	NaN	NaN	NaN	NaN	NaN
NaN	NaN	NaN	NaN	NaN	NaN	NaN	NaN	NaN	NaN	NaN	NaN	NaN	NaN	NaN	NaN	NaN	NaN	NaN	NaN	NaN	NaN	NaN	NaN	NaN	NaN	NaN	NaN	NaN	NaN	NaN	NaN	NaN	NaN	NaN	NaN	NaN	NaN	NaN	NaN	NaN	NaN	NaN	NaN	NaN	NaN	NaN	NaN	NaN	NaN
NaN	NaN	NaN	NaN	NaN	NaN	NaN	NaN	NaN	NaN	NaN	NaN	NaN	NaN	NaN	NaN	NaN	NaN	NaN	NaN	NaN	NaN	NaN	NaN	NaN	NaN	NaN	NaN	NaN	NaN	NaN	NaN	NaN	NaN	NaN	NaN	NaN	NaN	NaN	NaN	NaN	NaN	NaN	NaN	NaN	NaN	NaN	NaN	NaN	NaN
NaN	NaN	NaN	NaN	NaN	NaN	NaN	NaN	NaN	NaN	NaN	NaN	NaN	NaN	NaN	NaN	NaN	NaN	NaN	NaN	NaN	NaN	NaN	NaN	NaN	NaN	NaN	NaN	NaN	NaN	NaN	NaN	NaN	NaN	NaN	NaN	NaN	NaN	NaN	NaN	NaN	NaN	NaN	NaN	NaN	NaN	NaN	NaN	NaN	NaN
NaN	NaN	NaN	NaN	NaN	NaN	NaN	NaN	NaN	NaN	NaN	NaN	NaN	NaN	NaN	NaN	NaN	NaN	NaN	NaN	NaN	NaN	NaN	NaN	NaN	NaN	NaN	NaN	NaN	NaN	NaN	NaN	NaN	NaN	NaN	NaN	NaN	NaN	NaN	NaN	NaN	NaN	NaN	NaN	NaN	NaN	NaN	NaN	NaN	NaN
NaN	NaN	NaN	NaN	NaN	NaN	NaN	NaN	NaN	NaN	NaN	NaN	NaN	NaN	NaN	NaN	NaN	NaN	NaN	NaN	NaN	NaN	NaN	NaN	NaN	NaN	NaN	NaN	NaN	NaN	NaN	NaN	NaN	NaN	NaN	NaN	NaN	NaN	NaN	NaN	NaN	NaN	NaN	NaN	NaN	NaN	NaN	NaN	NaN	NaN
NaN	NaN	NaN	NaN	NaN	NaN	NaN	NaN	NaN	NaN	NaN	NaN	NaN	NaN	NaN	NaN	NaN	NaN	NaN	NaN	NaN	NaN	NaN	NaN	NaN	NaN	NaN	NaN	NaN	NaN	NaN	NaN	NaN	NaN	NaN	NaN	NaN	NaN	NaN	NaN	NaN	NaN	NaN	NaN	NaN	NaN	NaN	NaN	NaN	NaN
NaN	NaN	NaN	NaN	NaN	NaN	NaN	NaN	NaN	NaN	NaN	NaN	NaN	NaN	NaN	NaN	NaN	NaN	NaN	NaN	NaN	NaN	NaN	NaN	NaN	NaN	NaN	NaN	NaN	NaN	NaN	NaN	NaN	NaN	NaN	NaN	NaN	NaN	NaN	NaN	NaN	NaN	NaN	NaN	NaN	NaN	NaN	NaN	NaN	NaN
NaN	NaN	NaN	NaN	NaN	NaN	NaN	NaN	NaN	NaN	NaN	NaN	NaN	NaN	NaN	NaN	NaN	NaN	NaN	NaN	NaN	NaN	NaN	NaN	NaN	NaN	NaN	NaN	NaN	NaN	NaN	NaN	NaN	NaN	NaN	NaN	NaN	NaN	NaN	NaN	NaN	NaN	NaN	NaN	NaN	NaN	NaN	NaN	NaN	NaN
NaN	NaN	NaN	NaN	NaN	NaN	NaN	NaN	NaN	NaN	NaN	NaN	NaN	NaN	NaN	NaN	NaN	NaN	NaN	NaN	NaN	NaN	NaN	NaN	NaN	NaN	NaN	NaN	NaN	NaN	NaN	NaN	NaN	NaN	NaN	NaN	NaN	NaN	NaN	NaN	NaN	NaN	NaN	NaN	NaN	NaN	NaN	NaN	NaN	NaN
NaN	NaN	NaN	NaN	NaN	NaN	NaN	NaN	NaN	NaN	NaN	NaN	NaN	NaN	NaN	NaN	NaN	NaN	NaN	NaN	NaN	NaN	NaN	NaN	NaN	NaN	NaN	NaN	NaN	NaN	NaN	NaN	NaN	NaN	NaN	NaN	NaN	NaN	NaN	NaN	NaN	NaN	NaN	NaN	NaN	NaN	NaN	NaN	NaN	NaN
NaN	NaN	NaN	NaN	NaN	NaN	NaN	NaN	NaN	NaN	NaN	NaN	NaN	NaN	NaN	NaN	NaN	NaN	NaN	NaN	NaN	NaN	NaN	NaN	NaN	NaN	NaN	NaN	NaN	NaN	NaN	NaN	NaN	NaN	NaN	NaN	NaN	NaN	NaN	NaN	NaN	NaN	NaN	NaN	NaN	NaN	NaN	NaN	NaN	NaN
NaN	NaN	NaN	NaN	NaN	NaN	NaN	NaN	NaN	NaN	NaN	NaN	NaN	NaN	NaN	NaN	NaN	NaN	NaN	NaN	NaN	NaN	NaN	NaN	NaN	NaN	NaN	NaN	NaN	NaN	NaN	NaN	NaN	NaN	NaN	NaN	NaN	NaN	NaN	NaN	NaN	NaN	NaN	NaN	NaN	NaN	NaN	NaN	NaN	NaN
NaN	NaN	NaN	NaN	NaN	NaN	NaN	NaN	NaN	NaN	NaN	NaN	NaN	NaN	NaN	NaN	NaN	NaN	NaN	NaN	NaN	NaN	NaN	NaN	NaN	NaN	NaN	NaN	NaN	NaN	NaN	NaN	NaN	NaN	NaN	NaN	NaN	NaN	NaN	NaN	NaN	NaN	NaN	NaN	NaN	NaN	NaN	NaN	NaN	NaN
NaN	NaN	NaN	NaN	NaN	NaN	NaN	NaN	NaN	NaN	NaN	NaN	NaN	NaN	NaN	NaN	NaN	NaN	NaN	NaN	NaN	NaN	NaN	NaN	NaN	NaN	NaN	NaN	NaN	NaN	NaN	NaN	NaN	NaN	NaN	NaN	NaN	NaN	NaN	NaN	NaN	NaN	NaN	NaN	NaN	NaN	NaN	NaN	NaN	NaN
NaN	NaN	NaN	NaN	NaN	NaN	NaN	NaN	NaN	NaN	NaN	NaN	NaN	NaN	NaN	NaN	NaN	NaN	NaN	NaN	NaN	NaN	NaN	NaN	NaN	NaN	NaN	NaN	NaN	NaN	NaN	NaN	NaN	NaN	NaN	NaN	NaN	NaN	NaN	NaN	NaN	NaN	NaN	NaN	NaN	NaN	NaN	NaN	NaN	NaN
NaN	NaN	NaN	NaN	NaN	NaN	NaN	NaN	NaN	NaN	NaN	NaN	NaN	NaN	NaN	NaN	NaN	NaN	NaN	NaN	NaN	NaN	NaN	NaN	NaN	NaN	NaN	NaN	NaN	NaN	NaN	NaN	NaN	NaN	NaN	NaN	NaN	NaN	NaN	NaN	NaN	NaN	NaN	NaN	NaN	NaN	NaN	NaN	NaN	NaN
NaN	NaN	NaN	NaN	NaN	NaN	NaN	NaN	NaN	NaN	NaN	NaN	NaN	NaN	NaN	NaN	NaN	NaN	NaN	NaN	NaN	NaN	NaN	NaN	NaN	NaN	NaN	NaN	NaN	NaN	NaN	NaN	NaN	NaN	NaN	NaN	NaN	NaN	NaN	NaN	NaN	NaN	NaN	NaN	NaN	NaN	NaN	NaN	NaN	NaN
NaN	NaN	NaN	NaN	NaN	NaN	NaN	NaN	NaN	NaN	NaN	NaN	NaN	NaN	NaN	NaN	NaN	NaN	NaN	NaN	NaN	NaN	NaN	NaN	NaN	NaN	NaN	NaN	NaN	NaN	NaN	NaN	NaN	NaN	NaN	NaN	NaN	NaN	NaN	NaN	NaN	NaN	NaN	NaN	NaN	NaN	NaN	NaN	NaN	NaN
NaN	NaN	NaN	NaN	NaN	NaN	NaN	NaN	NaN	NaN	NaN	NaN	NaN	NaN	NaN	NaN	NaN	NaN	NaN	NaN	NaN	NaN	NaN	NaN	NaN	NaN	NaN	NaN	NaN	NaN	NaN	NaN	NaN	NaN	NaN	NaN	NaN	NaN	NaN	NaN	NaN	NaN	NaN	NaN	NaN	NaN	NaN	NaN	NaN	NaN
NaN	NaN	NaN	NaN	NaN	NaN	NaN	NaN	NaN	NaN	NaN	NaN	NaN	NaN	NaN	NaN	NaN	NaN	NaN	NaN	NaN	NaN	NaN	NaN	NaN	NaN	NaN	NaN	NaN	NaN	NaN	NaN	NaN	NaN	NaN	NaN	NaN	NaN	NaN	NaN	NaN	NaN	NaN	NaN	NaN	NaN	NaN	NaN	NaN	NaN
NaN	NaN	NaN	NaN	NaN	NaN	NaN	NaN	NaN	NaN	NaN	NaN	NaN	NaN	NaN	NaN	NaN	NaN	NaN	NaN	NaN	NaN	NaN	NaN	NaN	NaN	NaN	NaN	NaN	NaN	NaN	NaN	NaN	NaN	NaN	NaN	NaN	NaN	NaN	NaN	NaN	NaN	NaN	NaN	NaN	NaN	NaN	NaN	NaN	NaN
NaN	NaN	NaN	NaN	NaN	NaN	NaN	NaN	NaN	NaN	NaN	NaN	NaN	NaN	NaN	NaN	NaN	NaN	NaN	NaN	NaN	NaN	NaN	NaN	NaN	NaN	NaN	NaN	NaN	NaN	NaN	NaN	NaN	NaN	NaN	NaN	NaN	NaN	NaN	NaN	NaN	NaN	NaN	NaN	NaN	NaN	NaN	NaN	NaN	NaN
NaN	NaN	NaN	NaN	NaN	NaN	NaN	NaN	NaN	NaN	NaN	NaN	NaN	NaN	NaN	NaN	NaN	NaN	NaN	NaN	NaN	NaN	NaN	NaN	NaN	NaN	NaN	NaN	NaN	NaN	NaN	NaN	NaN	NaN	NaN	NaN	NaN	NaN	NaN	NaN	NaN	NaN	NaN	NaN	NaN	NaN	NaN	NaN	NaN	NaN
NaN	NaN	NaN	NaN	NaN	NaN	NaN	NaN	NaN	NaN	NaN	NaN	NaN	NaN	NaN	NaN	NaN	NaN	NaN	NaN	NaN	NaN	NaN	NaN	NaN	NaN	NaN	NaN	NaN	NaN	NaN	NaN	NaN	NaN	NaN	NaN	NaN	NaN	NaN	NaN	NaN	NaN	NaN	NaN	NaN	NaN	NaN	NaN	NaN	NaN
NaN	NaN	NaN	NaN	NaN	NaN	NaN	NaN	NaN	NaN	NaN	NaN	NaN	NaN	NaN	NaN	NaN	NaN	NaN	NaN	NaN	NaN	NaN	NaN	NaN	NaN	NaN	NaN	NaN	NaN	NaN	NaN	NaN	NaN	NaN	NaN	NaN	NaN	NaN	NaN	NaN	NaN	NaN	NaN	NaN	NaN	NaN	NaN	NaN	NaN
NaN	NaN	NaN	NaN	NaN	NaN	NaN	NaN	NaN	NaN	NaN	NaN	NaN	NaN	NaN	NaN	NaN	NaN	NaN	NaN	NaN	NaN	NaN	NaN	NaN	NaN	NaN	NaN	NaN	NaN	NaN	NaN	NaN	NaN	NaN	NaN	NaN	NaN	NaN	NaN	NaN	NaN	NaN	NaN	NaN	NaN	NaN	NaN	NaN	NaN
NaN	NaN	NaN	NaN	NaN	NaN	NaN	NaN	NaN	NaN	NaN	NaN	NaN	NaN	NaN	NaN	NaN	NaN	NaN	NaN	NaN	NaN	NaN	NaN	NaN	NaN	NaN	NaN	NaN	NaN	NaN	NaN	NaN	NaN	NaN	NaN	NaN	NaN	NaN	NaN	NaN	NaN	NaN	NaN	NaN	NaN	NaN	NaN	NaN	NaN
NaN	NaN	NaN	NaN	NaN	NaN	NaN	NaN	NaN	NaN	NaN	NaN	NaN	NaN	NaN	NaN	NaN	NaN	NaN	NaN	NaN	NaN	NaN	NaN	NaN	NaN	NaN	NaN	NaN	NaN	NaN	NaN	NaN	NaN	NaN	NaN	NaN	NaN	NaN	NaN	NaN	NaN	NaN	NaN	NaN	NaN	NaN	NaN	NaN	NaN
NaN	NaN	NaN	NaN	NaN	NaN	NaN	NaN	NaN	NaN	NaN	NaN	NaN	NaN	NaN	NaN	NaN	NaN	NaN	NaN	NaN	NaN	NaN	NaN	NaN	NaN	NaN	NaN	NaN	NaN	NaN	NaN	NaN	NaN	NaN	NaN	NaN	NaN	NaN	NaN	NaN	NaN	NaN	NaN	NaN	NaN	NaN	NaN	NaN	NaN
NaN	NaN	NaN	NaN	NaN	NaN	NaN	NaN	NaN	NaN	NaN	NaN	NaN	NaN	NaN	NaN	NaN	NaN	NaN	NaN	NaN	NaN	NaN	NaN	NaN	NaN	NaN	NaN	NaN	NaN	NaN	NaN	NaN	NaN	NaN	NaN	NaN	NaN	NaN	NaN	NaN	NaN	NaN	NaN	NaN	NaN	NaN	NaN	NaN	NaN
NaN	NaN	NaN	NaN	NaN	NaN	NaN	NaN	NaN	NaN	NaN	NaN	NaN	NaN	NaN	NaN	NaN	NaN	NaN	NaN	NaN	NaN	NaN	NaN	NaN	NaN	NaN	NaN	NaN	NaN	NaN	NaN	NaN	NaN	NaN	NaN	NaN	NaN	NaN	NaN	NaN	NaN	NaN	NaN	NaN	NaN	NaN	NaN	NaN	NaN
NaN	NaN	NaN	NaN	NaN	NaN	NaN	NaN	NaN	NaN	NaN	NaN	NaN	NaN	NaN	NaN	NaN	NaN	NaN	NaN	NaN	NaN	NaN	NaN	NaN	NaN	NaN	NaN	NaN	NaN	NaN	NaN	NaN	NaN	NaN	NaN	NaN	NaN	NaN	NaN	NaN	NaN	NaN	NaN	NaN	NaN	NaN	NaN	NaN	NaN
NaN	NaN	NaN	NaN	NaN	NaN	NaN	NaN	NaN	NaN	NaN	NaN	NaN	NaN	NaN	NaN	NaN	NaN	NaN	NaN	NaN	NaN	NaN	NaN	NaN	NaN	NaN	NaN	NaN	NaN	NaN	NaN	NaN	NaN	NaN	NaN	NaN	NaN	NaN	NaN	NaN	NaN	NaN	NaN	NaN	NaN	NaN	NaN	NaN	NaN
NaN	NaN	NaN	NaN	NaN	NaN	NaN	NaN	NaN	NaN	NaN	NaN	NaN	NaN	NaN	NaN	NaN	NaN	NaN	NaN	NaN	NaN	NaN	NaN	NaN	NaN	NaN	NaN	NaN	NaN	NaN	NaN	NaN	NaN	NaN	NaN	NaN	NaN	NaN	NaN	NaN	NaN	NaN	NaN	NaN	NaN	NaN	NaN	NaN	NaN
NaN	NaN	NaN	NaN	NaN	NaN	NaN	NaN	NaN	NaN	NaN	NaN	NaN	NaN	NaN	NaN	NaN	NaN	NaN	NaN	NaN	NaN	NaN	NaN	NaN	NaN	NaN	NaN	NaN	NaN	NaN	NaN	NaN	NaN	NaN	NaN	NaN	NaN	NaN	NaN	NaN	NaN	NaN	NaN	NaN	NaN	NaN	NaN	NaN	NaN
NaN	NaN	NaN	NaN	NaN	NaN	NaN	NaN	NaN	NaN	NaN	NaN	NaN	NaN	NaN	NaN	NaN	NaN	NaN	NaN	NaN	NaN	NaN	NaN	NaN	NaN	NaN	NaN	NaN	NaN	NaN	NaN	NaN	NaN	NaN	NaN	NaN	NaN	NaN	NaN	NaN	NaN	NaN	NaN	NaN	NaN	NaN	NaN	NaN	NaN
NaN	NaN	NaN	NaN	NaN	NaN	NaN	NaN	NaN	NaN	NaN	NaN	NaN	NaN	NaN	NaN	NaN	NaN	NaN	NaN	NaN	NaN	NaN	NaN	NaN	NaN	NaN	NaN	NaN	NaN	NaN	NaN	NaN	NaN	NaN	NaN	NaN	NaN	NaN	NaN	NaN	NaN	NaN	NaN	NaN	NaN	NaN	NaN	NaN	NaN
NaN	NaN	NaN	NaN	NaN	NaN	NaN	NaN	NaN	NaN	NaN	NaN	NaN	NaN	NaN	NaN	NaN	NaN	NaN	NaN	NaN	NaN	NaN	NaN	NaN	NaN	NaN	NaN	NaN	NaN	NaN	NaN	NaN	NaN	NaN	NaN	NaN	NaN	NaN	NaN	NaN	NaN	NaN	NaN	NaN	NaN	NaN	NaN	NaN	NaN
NaN	NaN	NaN	NaN	NaN	NaN	NaN	NaN	NaN	NaN	NaN	NaN	NaN	NaN	NaN	NaN	NaN	NaN	NaN	NaN	NaN	NaN	NaN	NaN	NaN	NaN	NaN	NaN	NaN	NaN	NaN	NaN	NaN	NaN	NaN	NaN	NaN	NaN	NaN	NaN	NaN	NaN	NaN	NaN	NaN	NaN	NaN	NaN	NaN	NaN
NaN	NaN	NaN	NaN	NaN	NaN	NaN	NaN	NaN	NaN	NaN	NaN	NaN	NaN	NaN	NaN	NaN	NaN	NaN	NaN	NaN	NaN	NaN	NaN	NaN	NaN	NaN	NaN	NaN	NaN	NaN	NaN	NaN	NaN	NaN	NaN	NaN	NaN	NaN	NaN	NaN	NaN	NaN	NaN	NaN	NaN	NaN	NaN	NaN	NaN
NaN	NaN	NaN	NaN	NaN	NaN	NaN	NaN	NaN	NaN	NaN	NaN	NaN	NaN	NaN	NaN	NaN	NaN	NaN	NaN	NaN	NaN	NaN	NaN	NaN	NaN	NaN	NaN	NaN	NaN	NaN	NaN	NaN	NaN	NaN	NaN	NaN	NaN	NaN	NaN	NaN	NaN	NaN	NaN	NaN	NaN	NaN	NaN	NaN	NaN
NaN	NaN	NaN	NaN	NaN	NaN	NaN	NaN	NaN	NaN	NaN	NaN	NaN	NaN	NaN	NaN	NaN	NaN	NaN	NaN	NaN	NaN	NaN	NaN	NaN	NaN	NaN	NaN	NaN	NaN	NaN	NaN	NaN	NaN	NaN	NaN	NaN	NaN	NaN	NaN	NaN	NaN	NaN	NaN	NaN	NaN	NaN	NaN	NaN	NaN
NaN	NaN	NaN	NaN	NaN	NaN	NaN	NaN	NaN	NaN	NaN	NaN	NaN	NaN	NaN	NaN	NaN	NaN	NaN	NaN	NaN	NaN	NaN	NaN	NaN	NaN	NaN	NaN	NaN	NaN	NaN	NaN	NaN	NaN	NaN	NaN	NaN	NaN	NaN	NaN	NaN	NaN	NaN	NaN	NaN	NaN	NaN	NaN	NaN	NaN
NaN	NaN	NaN	NaN	NaN	NaN	NaN	NaN	NaN	NaN	NaN	NaN	NaN	NaN	NaN	NaN	NaN	NaN	NaN	NaN	NaN	NaN	NaN	NaN	NaN	NaN	NaN	NaN	NaN	NaN	NaN	NaN	NaN	NaN	NaN	NaN	NaN	NaN	NaN	NaN	NaN	NaN	NaN	NaN	NaN	NaN	NaN	NaN	NaN	NaN
NaN	NaN	NaN	NaN	NaN	NaN	NaN	NaN	NaN	NaN	NaN	NaN	NaN	NaN	NaN	NaN	NaN	NaN	NaN	NaN	NaN	NaN	NaN	NaN	NaN	NaN	NaN	NaN	NaN	NaN	NaN	NaN	NaN	NaN	NaN	NaN	NaN	NaN	NaN	NaN	NaN	NaN	NaN	NaN	NaN	NaN	NaN	NaN	NaN	NaN
NaN	NaN	NaN	NaN	NaN	NaN	NaN	NaN	NaN	NaN	NaN	NaN	NaN	NaN	NaN	NaN	NaN	NaN	NaN	NaN	NaN	NaN	NaN	NaN	NaN	NaN	NaN	NaN	NaN	NaN	NaN	NaN	NaN	NaN	NaN	NaN	NaN	NaN	NaN	NaN	NaN	NaN	NaN	NaN	NaN	NaN	NaN	NaN	NaN	NaN
NaN	NaN	NaN	NaN	NaN	NaN	NaN	NaN	NaN	NaN	NaN	NaN	NaN	NaN	NaN	NaN	NaN	NaN	NaN	NaN	NaN	NaN	NaN	NaN	NaN	NaN	NaN	NaN	NaN	NaN	NaN	NaN	NaN	NaN	NaN	NaN	NaN	NaN	NaN	NaN	NaN	NaN	NaN	NaN	NaN	NaN	NaN	NaN	NaN	NaN
NaN	NaN	NaN	NaN	NaN	NaN	NaN	NaN	NaN	NaN	NaN	NaN	NaN	NaN	NaN	NaN	NaN	NaN	NaN	NaN	NaN	NaN	NaN	NaN	NaN	NaN	NaN	NaN	NaN	NaN	NaN	NaN	NaN	NaN	NaN	NaN	NaN	NaN	NaN	NaN	NaN	NaN	NaN	NaN	NaN	NaN	NaN	NaN	NaN	NaN
NaN	NaN	NaN	NaN	NaN	NaN	NaN	NaN	NaN	NaN	NaN	NaN	NaN	NaN	NaN	NaN	NaN	NaN	NaN	NaN	NaN	NaN	NaN	NaN	NaN	NaN	NaN	NaN	NaN	NaN	NaN	NaN	NaN	NaN	NaN	NaN	NaN	NaN	NaN	NaN	NaN	NaN	NaN	NaN	NaN	NaN	NaN	NaN	NaN	NaN
NaN	NaN	NaN	NaN	NaN	NaN	NaN	NaN	NaN	NaN	NaN	NaN	NaN	NaN	NaN	NaN	NaN	NaN	NaN	NaN	NaN	NaN	NaN	NaN	NaN	NaN	NaN	NaN	NaN	NaN	NaN	NaN	NaN	NaN	NaN	NaN	NaN	NaN	NaN	NaN	NaN	NaN	NaN	NaN	NaN	NaN	NaN	NaN	NaN	NaN
NaN	NaN	NaN	NaN	NaN	NaN	NaN	NaN	NaN	NaN	NaN	NaN	NaN	NaN	NaN	NaN	NaN	NaN	NaN	NaN	NaN	NaN	NaN	NaN	NaN	NaN	NaN	NaN	NaN	NaN	NaN	NaN	NaN	NaN	NaN	NaN	NaN	NaN	NaN	NaN	NaN	NaN	NaN	NaN	NaN	NaN	NaN	NaN	NaN	NaN
NaN	NaN	NaN	NaN	NaN	NaN	NaN	NaN	NaN	NaN	NaN	NaN	NaN	NaN	NaN	NaN	NaN	NaN	NaN	NaN	NaN	NaN	NaN	NaN	NaN	NaN	NaN	NaN	NaN	NaN	NaN	NaN	NaN	NaN	NaN	NaN	NaN	NaN	NaN	NaN	NaN	NaN	NaN	NaN	NaN	NaN	NaN	NaN	NaN	NaN
[truncated: 151 more columns]

## Sheet: fig1.c
R	h=19d	h=27d	h=37d	h=47d	h=57d		H=4d	H=7d	H=10d	H=13d
0.5	0.636053	0.634719	0.642853	0.645465	0.638613		0.639224	0.63663	0.642046	0.639021
1.5	0.637925	0.636165	0.64373	0.645358	0.641892		0.635921	0.641738	0.642117	0.641478
2.5	0.635978	0.634055	0.641407	0.648622	0.643366		0.64033	0.637348	0.638095	0.637846
3.5	0.627285	0.632477	0.63791	0.645423	0.643176		0.640275	0.636852	0.636742	0.638702
4.5	0.623383	0.632255	0.633516	0.641043	0.642574		0.63818	0.630598	0.633316	0.632978
5.5	0.622431	0.623295	0.630674	0.637511	0.638828		0.63811	0.626288	0.628294	0.629017
6.5	0.620831	0.620854	0.628116	0.632075	0.635108		0.633178	0.623818	0.624778	0.626096
7.5	0.613502	0.616983	0.624692	0.628699	0.633087		0.631333	0.620374	0.620955	0.621773
8.5	0.608815	0.615818	0.620043	0.621563	0.627036		0.627469	0.617341	0.61708	0.615476
9.5	0.610027	0.611513	0.61673	0.618006	0.623144		0.622336	0.612416	0.611897	0.608094
10.5	0.60815	0.609189	0.612842	0.61498	0.619457		0.616465	0.607129	0.608859	NaN
11.5	0.607047	0.606591	0.609206	0.610372	0.615208		0.613385	0.606566	0.607256	NaN
12.5	0.604252	0.605828	0.606083	0.607819	0.610336		0.611466	0.60685	0.604615	NaN
13.5	0.603267	0.605665	0.603569	0.606631	0.609989		0.609551	0.605297	0.602355	NaN
14.5	0.604083	0.603768	0.604701	0.604782	0.608681		0.61093	0.603911	0.603672	NaN
15.5	0.600945	0.60238	0.604819	0.604308	0.606414		0.610949	0.602918	NaN	NaN
16.5	0.59907	0.602063	0.604569	0.606174	0.606913		0.610227	0.602225	NaN	NaN
17.5	0.59846	0.602048	0.60395	0.607055	0.606347		0.610249	0.601015	NaN	NaN
18.5	0.600486	0.600866	0.604871	0.605479	0.607939		0.61093	0.60201	NaN	NaN
19.5	0.599909	0.602002	0.604883	0.604032	0.606752		0.610645	0.603243	NaN	NaN
20.5	0.600494	0.601929	0.602433	0.603639	0.609364		0.609209	0.6035	NaN	NaN
21.5	0.59924	0.599804	0.604835	0.606674	0.611153		0.611391	0.602156	NaN	NaN
22.5	0.601029	0.6023	0.604726	0.606808	0.610992		0.612224	NaN	NaN	NaN
23.5	0.597697	0.60101	0.606141	0.606828	0.61241		0.61169	NaN	NaN	NaN
24.5	NaN	NaN	0.605116	0.606493	0.610683		0.611749	NaN	NaN	NaN
25.5	NaN	NaN	0.604113	0.605351	0.608429		0.612448	NaN	NaN	NaN
26.5	NaN	NaN	0.601976	0.602339	0.607253		0.614394	NaN	NaN	NaN
27.5	NaN	NaN	0.598609	0.599529	0.600893		0.614914	NaN	NaN	NaN
28.5	NaN	NaN	NaN	NaN	0.601603		0.614492	NaN	NaN	NaN
29.5	NaN	NaN	NaN	NaN	NaN		0.603003	NaN	NaN	NaN
30.5	NaN	NaN	NaN	NaN	NaN		NaN	NaN	NaN	NaN
31.5	NaN	NaN	NaN	NaN	NaN		NaN	NaN	NaN	NaN
32.5	NaN	NaN	NaN	NaN	NaN		NaN	NaN	NaN	NaN
33.5	NaN	NaN	NaN	NaN	NaN		NaN	NaN	NaN	NaN
34.5	NaN	NaN	NaN	NaN	NaN		NaN	NaN	NaN	NaN

## Sheet: fig1.d
h	phi_a	phi_b
19	0.630459	0.599737
28.5	0.633884	0.601882
38	0.638723	0.608422
47.5	0.64265	0.610374
57	0.641368	0.611712

## Sheet: fig2.a
-2.68825	-2.60369	-2.52573	-2.45341	-2.38597	-2.36446	-2.36446	-2.36446	-2.36446	-2.38597	-2.36446	-2.36446	-2.34341	-2.32279	-2.30259	-2.28278	-2.28278	-2.26336	-2.26336	-2.28278	-2.28278	-2.28278	-2.26336	-2.26336	-2.24432	-2.22562	-2.22562	-2.22562	-2.22562	-2.22562	-2.22562	-2.22562	-2.20727	-2.20727	-2.18926	-2.17156	-2.17156	-2.17156	-2.17156	-2.17156	-2.18926	-2.18926	-2.18926	-2.18926	-2.17156	-2.17156	-2.17156	-2.17156	-2.18926	-2.20727
-2.68825	-2.60369	-2.52573	-2.45341	-2.40795	-2.38597	-2.38597	-2.38597	-2.38597	-2.38597	-2.38597	-2.36446	-2.36446	-2.34341	-2.32279	-2.30259	-2.28278	-2.28278	-2.28278	-2.28278	-2.28278	-2.28278	-2.26336	-2.26336	-2.24432	-2.24432	-2.22562	-2.22562	-2.22562	-2.24432	-2.22562	-2.22562	-2.20727	-2.20727	-2.18926	-2.17156	-2.17156	-2.17156	-2.17156	-2.17156	-2.18926	-2.18926	-2.18926	-2.18926	-2.17156	-2.17156	-2.17156	-2.17156	-2.18926	-2.18926
-2.68825	-2.63109	-2.55105	-2.47694	-2.40795	-2.38597	-2.38597	-2.38597	-2.38597	-2.38597	-2.38597	-2.38597	-2.36446	-2.34341	-2.32279	-2.30259	-2.28278	-2.28278	-2.28278	-2.28278	-2.28278	-2.28278	-2.26336	-2.26336	-2.24432	-2.24432	-2.24432	-2.22562	-2.24432	-2.24432	-2.22562	-2.22562	-2.20727	-2.20727	-2.18926	-2.18926	-2.17156	-2.17156	-2.17156	-2.18926	-2.18926	-2.18926	-2.18926	-2.18926	-2.17156	-2.17156	-2.17156	-2.17156	-2.18926	-2.20727
-2.68825	-2.63109	-2.55105	-2.47694	-2.43042	-2.40795	-2.38597	-2.38597	-2.38597	-2.38597	-2.38597	-2.38597	-2.36446	-2.34341	-2.32279	-2.30259	-2.28278	-2.28278	-2.28278	-2.28278	-2.28278	-2.28278	-2.26336	-2.26336	-2.24432	-2.24432	-2.22562	-2.22562	-2.22562	-2.22562	-2.22562	-2.22562	-2.20727	-2.20727	-2.18926	-2.18926	-2.17156	-2.17156	-2.17156	-2.18926	-2.18926	-2.18926	-2.18926	-2.18926	-2.18926	-2.17156	-2.17156	-2.18926	-2.18926	-2.20727
-2.68825	-2.63109	-2.55105	-2.47694	-2.43042	-2.38597	-2.38597	-2.38597	-2.38597	-2.38597	-2.38597	-2.36446	-2.34341	-2.32279	-2.32279	-2.30259	-2.28278	-2.28278	-2.28278	-2.28278	-2.28278	-2.28278	-2.26336	-2.26336	-2.24432	-2.22562	-2.22562	-2.22562	-2.22562	-2.22562	-2.22562	-2.22562	-2.20727	-2.18926	-2.18926	-2.17156	-2.17156	-2.17156	-2.17156	-2.18926	-2.18926	-2.18926	-2.18926	-2.18926	-2.18926	-2.18926	-2.18926	-2.18926	-2.18926	-2.20727
-2.68825	-2.60369	-2.52573	-2.45341	-2.40795	-2.38597	-2.38597	-2.38597	-2.38597	-2.36446	-2.36446	-2.36446	-2.34341	-2.32279	-2.30259	-2.28278	-2.28278	-2.28278	-2.26336	-2.26336	-2.26336	-2.26336	-2.26336	-2.24432	-2.24432	-2.22562	-2.22562	-2.22562	-2.22562	-2.22562	-2.20727	-2.20727	-2.20727	-2.18926	-2.18926	-2.17156	-2.17156	-2.17156	-2.17156	-2.18926	-2.18926	-2.18926	-2.18926	-2.18926	-2.18926	-2.18926	-2.18926	-2.18926	-2.18926	-2.20727
-2.68825	-2.60369	-2.52573	-2.45341	-2.40795	-2.38597	-2.36446	-2.36446	-2.36446	-2.36446	-2.34341	-2.34341	-2.32279	-2.30259	-2.30259	-2.28278	-2.26336	-2.26336	-2.26336	-2.26336	-2.26336	-2.26336	-2.24432	-2.24432	-2.22562	-2.22562	-2.20727	-2.20727	-2.20727	-2.20727	-2.20727	-2.20727	-2.18926	-2.18926	-2.17156	-2.17156	-2.17156	-2.17156	-2.17156	-2.18926	-2.18926	-2.18926	-2.18926	-2.18926	-2.18926	-2.18926	-2.18926	-2.18926	-2.20727	-2.20727
-2.68825	-2.60369	-2.52573	-2.45341	-2.40795	-2.36446	-2.36446	-2.36446	-2.34341	-2.34341	-2.34341	-2.32279	-2.32279	-2.30259	-2.28278	-2.28278	-2.26336	-2.26336	-2.26336	-2.26336	-2.26336	-2.24432	-2.24432	-2.22562	-2.22562	-2.20727	-2.20727	-2.20727	-2.20727	-2.20727	-2.20727	-2.20727	-2.18926	-2.18926	-2.17156	-2.17156	-2.17156	-2.17156	-2.17156	-2.18926	-2.18926	-2.20727	-2.20727	-2.20727	-2.18926	-2.18926	-2.18926	-2.18926	-2.20727	-2.20727
-2.68825	-2.60369	-2.52573	-2.45341	-2.40795	-2.36446	-2.36446	-2.34341	-2.34341	-2.34341	-2.32279	-2.32279	-2.30259	-2.30259	-2.28278	-2.26336	-2.26336	-2.26336	-2.26336	-2.24432	-2.24432	-2.24432	-2.24432	-2.24432	-2.22562	-2.22562	-2.20727	-2.20727	-2.20727	-2.20727	-2.20727	-2.20727	-2.18926	-2.18926	-2.18926	-2.17156	-2.17156	-2.17156	-2.18926	-2.18926	-2.20727	-2.20727	-2.20727	-2.20727	-2.20727	-2.20727	-2.20727	-2.20727	-2.20727	-2.22562
-2.68825	-2.63109	-2.52573	-2.45341	-2.40795	-2.36446	-2.34341	-2.34341	-2.34341	-2.34341	-2.32279	-2.32279	-2.30259	-2.30259	-2.28278	-2.28278	-2.26336	-2.26336	-2.26336	-2.26336	-2.26336	-2.26336	-2.24432	-2.24432	-2.22562	-2.22562	-2.22562	-2.22562	-2.22562	-2.22562	-2.22562	-2.22562	-2.20727	-2.20727	-2.18926	-2.18926	-2.18926	-2.18926	-2.18926	-2.20727	-2.20727	-2.22562	-2.22562	-2.22562	-2.22562	-2.22562	-2.22562	-2.22562	-2.22562	-2.24432
-2.7181	-2.63109	-2.55105	-2.47694	-2.40795	-2.36446	-2.36446	-2.34341	-2.34341	-2.34341	-2.32279	-2.32279	-2.30259	-2.30259	-2.28278	-2.28278	-2.28278	-2.26336	-2.26336	-2.26336	-2.26336	-2.26336	-2.26336	-2.26336	-2.24432	-2.24432	-2.24432	-2.24432	-2.24432	-2.24432	-2.24432	-2.24432	-2.22562	-2.22562	-2.20727	-2.20727	-2.20727	-2.20727	-2.20727	-2.22562	-2.22562	-2.24432	-2.24432	-2.24432	-2.24432	-2.24432	-2.24432	-2.24432	-2.24432	-2.26336
-2.74887	-2.65926	-2.55105	-2.47694	-2.43042	-2.38597	-2.36446	-2.34341	-2.34341	-2.34341	-2.34341	-2.32279	-2.32279	-2.30259	-2.30259	-2.30259	-2.30259	-2.28278	-2.28278	-2.28278	-2.28278	-2.28278	-2.28278	-2.28278	-2.26336	-2.26336	-2.26336	-2.26336	-2.26336	-2.26336	-2.26336	-2.26336	-2.26336	-2.24432	-2.24432	-2.22562	-2.22562	-2.22562	-2.22562	-2.24432	-2.24432	-2.26336	-2.26336	-2.26336	-2.26336	-2.26336	-2.26336	-2.26336	-2.26336	-2.28278
-2.74887	-2.68825	-2.57702	-2.50104	-2.43042	-2.38597	-2.36446	-2.36446	-2.36446	-2.34341	-2.34341	-2.34341	-2.32279	-2.32279	-2.32279	-2.32279	-2.32279	-2.30259	-2.30259	-2.30259	-2.30259	-2.30259	-2.30259	-2.30259	-2.28278	-2.28278	-2.28278	-2.28278	-2.28278	-2.28278	-2.28278	-2.28278	-2.28278	-2.26336	-2.26336	-2.24432	-2.24432	-2.24432	-2.26336	-2.26336	-2.28278	-2.28278	-2.28278	-2.28278	-2.28278	-2.28278	-2.28278	-2.30259	-2.30259	-2.30259
-2.78062	-2.68825	-2.60369	-2.50104	-2.45341	-2.40795	-2.38597	-2.36446	-2.36446	-2.36446	-2.36446	-2.34341	-2.34341	-2.34341	-2.34341	-2.34341	-2.34341	-2.32279	-2.32279	-2.32279	-2.32279	-2.32279	-2.32279	-2.32279	-2.30259	-2.30259	-2.30259	-2.30259	-2.30259	-2.30259	-2.30259	-2.30259	-2.30259	-2.28278	-2.28278	-2.28278	-2.26336	-2.26336	-2.28278	-2.28278	-2.30259	-2.30259	-2.30259	-2.30259	-2.30259	-2.30259	-2.32279	-2.32279	-2.32279	-2.32279
-2.81341	-2.7181	-2.60369	-2.52573	-2.45341	-2.40795	-2.38597	-2.38597	-2.36446	-2.36446	-2.36446	-2.36446	-2.36446	-2.36446	-2.36446	-2.36446	-2.36446	-2.34341	-2.34341	-2.34341	-2.34341	-2.34341	-2.34341	-2.32279	-2.32279	-2.32279	-2.32279	-2.32279	-2.32279	-2.32279	-2.32279	-2.32279	-2.32279	-2.30259	-2.30259	-2.28278	-2.28278	-2.28278	-2.30259	-2.30259	-2.32279	-2.32279	-2.32279	-2.32279	-2.32279	-2.32279	-2.34341	-2.34341	-2.34341	-2.34341
-2.81341	-2.7181	-2.63109	-2.52573	-2.45341	-2.43042	-2.40795	-2.38597	-2.38597	-2.38597	-2.38597	-2.38597	-2.38597	-2.38597	-2.38597	-2.38597	-2.36446	-2.36446	-2.36446	-2.36446	-2.36446	-2.36446	-2.34341	-2.34341	-2.34341	-2.34341	-2.32279	-2.34341	-2.34341	-2.34341	-2.34341	-2.34341	-2.34341	-2.32279	-2.32279	-2.30259	-2.30259	-2.30259	-2.32279	-2.32279	-2.34341	-2.34341	-2.34341	-2.34341	-2.34341	-2.34341	-2.34341	-2.36446	-2.36446	-2.36446
-2.84731	-2.74887	-2.63109	-2.55105	-2.47694	-2.43042	-2.40795	-2.40795	-2.38597	-2.38597	-2.38597	-2.38597	-2.38597	-2.38597	-2.38597	-2.38597	-2.38597	-2.38597	-2.38597	-2.38597	-2.38597	-2.36446	-2.36446	-2.36446	-2.34341	-2.34341	-2.34341	-2.34341	-2.34341	-2.36446	-2.36446	-2.36446	-2.34341	-2.34341	-2.32279	-2.32279	-2.32279	-2.32279	-2.32279	-2.34341	-2.34341	-2.36446	-2.36446	-2.36446	-2.36446	-2.36446	-2.36446	-2.38597	-2.38597	-2.38597
-2.84731	-2.74887	-2.65926	-2.55105	-2.50104	-2.45341	-2.43042	-2.40795	-2.40795	-2.40795	-2.40795	-2.40795	-2.40795	-2.40795	-2.40795	-2.40795	-2.40795	-2.40795	-2.40795	-2.40795	-2.38597	-2.38597	-2.38597	-2.36446	-2.36446	-2.36446	-2.36446	-2.36446	-2.36446	-2.36446	-2.36446	-2.36446	-2.36446	-2.36446	-2.34341	-2.34341	-2.34341	-2.34341	-2.34341	-2.36446	-2.36446	-2.36446	-2.36446	-2.36446	-2.38597	-2.38597	-2.38597	-2.38597	-2.38597	-2.38597
-2.8824	-2.78062	-2.68825	-2.57702	-2.52573	-2.47694	-2.45341	-2.43042	-2.43042	-2.43042	-2.43042	-2.43042	-2.43042	-2.43042	-2.45341	-2.45341	-2.43042	-2.43042	-2.43042	-2.43042	-2.40795	-2.40795	-2.40795	-2.40795	-2.38597	-2.38597	-2.38597	-2.38597	-2.38597	-2.38597	-2.38597	-2.38597	-2.38597	-2.36446	-2.36446	-2.36446	-2.34341	-2.36446	-2.36446	-2.36446	-2.38597	-2.38597	-2.38597	-2.38597	-2.38597	-2.38597	-2.40795	-2.40795	-2.40795	-2.40795
-2.91877	-2.81341	-2.7181	-2.60369	-2.55105	-2.50104	-2.47694	-2.45341	-2.45341	-2.45341	-2.45341	-2.45341	-2.47694	-2.47694	-2.47694	-2.47694	-2.47694	-2.45341	-2.45341	-2.45341	-2.45341	-2.43042	-2.43042	-2.43042	-2.40795	-2.40795	-2.40795	-2.40795	-2.40795	-2.40795	-2.40795	-2.40795	-2.40795	-2.38597	-2.38597	-2.38597	-2.36446	-2.36446	-2.38597	-2.38597	-2.40795	-2.40795	-2.40795	-2.40795	-2.40795	-2.40795	-2.40795	-2.43042	-2.43042	-2.43042
-2.91877	-2.84731	-2.74887	-2.65926	-2.57702	-2.52573	-2.50104	-2.50104	-2.50104	-2.50104	-2.50104	-2.50104	-2.50104	-2.50104	-2.50104	-2.50104	-2.50104	-2.50104	-2.47694	-2.47694	-2.47694	-2.47694	-2.45341	-2.45341	-2.43042	-2.43042	-2.43042	-2.43042	-2.43042	-2.43042	-2.43042	-2.43042	-2.40795	-2.40795	-2.40795	-2.38597	-2.38597	-2.38597	-2.40795	-2.40795	-2.40795	-2.43042	-2.43042	-2.43042	-2.43042	-2.43042	-2.43042	-2.43042	-2.45341	-2.45341
-2.95651	-2.8824	-2.78062	-2.68825	-2.60369	-2.57702	-2.55105	-2.52573	-2.52573	-2.52573	-2.52573	-2.52573	-2.52573	-2.52573	-2.52573	-2.52573	-2.52573	-2.52573	-2.50104	-2.50104	-2.50104	-2.50104	-2.47694	-2.47694	-2.47694	-2.45341	-2.45341	-2.45341	-2.45341	-2.45341	-2.45341	-2.45341	-2.43042	-2.43042	-2.43042	-2.40795	-2.40795	-2.40795	-2.43042	-2.43042	-2.43042	-2.43042	-2.43042	-2.43042	-2.45341	-2.45341	-2.45341	-2.45341	-2.45341	-2.45341
-2.99573	-2.91877	-2.81341	-2.7181	-2.65926	-2.60369	-2.57702	-2.55105	-2.55105	-2.55105	-2.55105	-2.55105	-2.55105	-2.55105	-2.55105	-2.55105	-2.55105	-2.55105	-2.52573	-2.52573	-2.52573	-2.52573	-2.50104	-2.50104	-2.50104	-2.47694	-2.47694	-2.47694	-2.47694	-2.47694	-2.47694	-2.45341	-2.45341	-2.45341	-2.45341	-2.43042	-2.43042	-2.43042	-2.43042	-2.45341	-2.45341	-2.45341	-2.45341	-2.45341	-2.45341	-2.47694	-2.47694	-2.47694	-2.47694	-2.47694
-2.99573	-2.91877	-2.84731	-2.74887	-2.68825	-2.63109	-2.60369	-2.57702	-2.57702	-2.57702	-2.57702	-2.57702	-2.57702	-2.57702	-2.57702	-2.57702	-2.57702	-2.55105	-2.55105	-2.55105	-2.55105	-2.52573	-2.52573	-2.52573	-2.50104	-2.50104	-2.50104	-2.50104	-2.50104	-2.47694	-2.47694	-2.47694	-2.47694	-2.45341	-2.45341	-2.45341	-2.45341	-2.45341	-2.45341	-2.45341	-2.47694	-2.47694	-2.47694	-2.47694	-2.47694	-2.47694	-2.50104	-2.50104	-2.50104	-2.50104
-2.99573	-2.95651	-2.84731	-2.78062	-2.68825	-2.65926	-2.63109	-2.60369	-2.60369	-2.60369	-2.60369	-2.57702	-2.57702	-2.57702	-2.57702	-2.57702	-2.57702	-2.57702	-2.57702	-2.55105	-2.55105	-2.55105	-2.55105	-2.52573	-2.52573	-2.52573	-2.50104	-2.50104	-2.50104	-2.50104	-2.50104	-2.50104	-2.47694	-2.47694	-2.47694	-2.45341	-2.45341	-2.45341	-2.47694	-2.47694	-2.47694	-2.47694	-2.50104	-2.50104	-2.50104	-2.50104	-2.50104	-2.52573	-2.52573	-2.50104
-2.99573	-2.95651	-2.84731	-2.78062	-2.7181	-2.65926	-2.63109	-2.63109	-2.60369	-2.60369	-2.60369	-2.60369	-2.60369	-2.60369	-2.60369	-2.60369	-2.60369	-2.57702	-2.57702	-2.57702	-2.57702	-2.55105	-2.55105	-2.55105	-2.52573	-2.52573	-2.52573	-2.52573	-2.52573	-2.50104	-2.50104	-2.50104	-2.50104	-2.47694	-2.47694	-2.47694	-2.47694	-2.47694	-2.47694	-2.50104	-2.50104	-2.50104	-2.50104	-2.50104	-2.50104	-2.52573	-2.52573	-2.52573	-2.52573	-2.52573
-2.99573	-2.95651	-2.84731	-2.78062	-2.7181	-2.68825	-2.65926	-2.63109	-2.63109	-2.63109	-2.63109	-2.60369	-2.60369	-2.60369	-2.60369	-2.60369	-2.60369	-2.60369	-2.57702	-2.57702	-2.57702	-2.57702	-2.55105	-2.55105	-2.55105	-2.52573	-2.52573	-2.52573	-2.52573	-2.52573	-2.50104	-2.50104	-2.50104	-2.50104	-2.47694	-2.47694	-2.47694	-2.47694	-2.50104	-2.50104	-2.50104	-2.50104	-2.52573	-2.52573	-2.52573	-2.52573	-2.52573	-2.55105	-2.55105	-2.52573
-2.99573	-2.95651	-2.84731	-2.78062	-2.7181	-2.68825	-2.65926	-2.65926	-2.63109	-2.63109	-2.63109	-2.63109	-2.63109	-2.63109	-2.60369	-2.60369	-2.60369	-2.60369	-2.60369	-2.57702	-2.57702	-2.57702	-2.57702	-2.55105	-2.55105	-2.55105	-2.55105	-2.52573	-2.52573	-2.52573	-2.52573	-2.50104	-2.50104	-2.50104	-2.47694	-2.47694	-2.47694	-2.50104	-2.50104	-2.50104	-2.52573	-2.52573	-2.52573	-2.52573	-2.52573	-2.52573	-2.55105	-2.55105	-2.55105	-2.52573
-2.99573	-2.91877	-2.84731	-2.78062	-2.7181	-2.68825	-2.65926	-2.65926	-2.65926	-2.65926	-2.63109	-2.63109	-2.63109	-2.63109	-2.63109	-2.63109	-2.63109	-2.60369	-2.60369	-2.60369	-2.57702	-2.57702	-2.57702	-2.57702	-2.55105	-2.55105	-2.55105	-2.52573	-2.52573	-2.52573	-2.52573	-2.50104	-2.50104	-2.50104	-2.47694	-2.47694	-2.47694	-2.50104	-2.50104	-2.50104	-2.52573	-2.52573	-2.52573	-2.52573	-2.52573	-2.52573	-2.52573	-2.55105	-2.55105	-2.52573
-2.99573	-2.91877	-2.84731	-2.78062	-2.74887	-2.68825	-2.68825	-2.65926	-2.65926	-2.65926	-2.65926	-2.65926	-2.63109	-2.63109	-2.63109	-2.63109	-2.63109	-2.60369	-2.60369	-2.60369	-2.57702	-2.57702	-2.57702	-2.57702	-2.55105	-2.55105	-2.55105	-2.52573	-2.52573	-2.52573	-2.50104	-2.50104	-2.50104	-2.47694	-2.47694	-2.47694	-2.47694	-2.50104	-2.50104	-2.52573	-2.52573	-2.52573	-2.52573	-2.52573	-2.52573	-2.52573	-2.52573	-2.52573	-2.52573	-2.52573
-2.99573	-2.91877	-2.84731	-2.78062	-2.74887	-2.68825	-2.68825	-2.65926	-2.65926	-2.65926	-2.65926	-2.65926	-2.63109	-2.63109	-2.63109	-2.63109	-2.63109	-2.60369	-2.60369	-2.60369	-2.57702	-2.57702	-2.57702	-2.57702	-2.55105	-2.55105	-2.55105	-2.52573	-2.52573	-2.52573	-2.50104	-2.50104	-2.50104	-2.47694	-2.47694	-2.47694	-2.50104	-2.50104	-2.50104	-2.52573	-2.52573	-2.52573	-2.52573	-2.52573	-2.52573	-2.52573	-2.52573	-2.52573	-2.52573	-2.52573
-2.99573	-2.91877	-2.84731	-2.78062	-2.7181	-2.68825	-2.65926	-2.65926	-2.65926	-2.65926	-2.65926	-2.65926	-2.63109	-2.63109	-2.63109	-2.63109	-2.60369	-2.60369	-2.60369	-2.57702	-2.57702	-2.57702	-2.57702	-2.57702	-2.55105	-2.55105	-2.55105	-2.52573	-2.52573	-2.52573	-2.50104	-2.50104	-2.47694	-2.47694	-2.47694	-2.47694	-2.50104	-2.50104	-2.50104	-2.52573	-2.52573	-2.52573	-2.52573	-2.52573	-2.52573	-2.52573	-2.52573	-2.52573	-2.52573	-2.52573
-2.95651	-2.91877	-2.84731	-2.78062	-2.7181	-2.68825	-2.65926	-2.65926	-2.65926	-2.65926	-2.65926	-2.63109	-2.63109	-2.63109	-2.60369	-2.60369	-2.60369	-2.60369	-2.57702	-2.57702	-2.57702	-2.57702	-2.55105	-2.55105	-2.55105	-2.55105	-2.52573	-2.52573	-2.52573	-2.50104	-2.50104	-2.50104	-2.47694	-2.47694	-2.47694	-2.47694	-2.50104	-2.50104	-2.50104	-2.52573	-2.52573	-2.52573	-2.52573	-2.52573	-2.52573	-2.52573	-2.52573	-2.52573	-2.52573	-2.52573
-2.95651	-2.91877	-2.84731	-2.78062	-2.7181	-2.68825	-2.65926	-2.65926	-2.65926	-2.65926	-2.63109	-2.63109	-2.63109	-2.60369	-2.60369	-2.60369	-2.60369	-2.57702	-2.57702	-2.57702	-2.55105	-2.55105	-2.55105	-2.55105	-2.55105	-2.52573	-2.52573	-2.52573	-2.50104	-2.50104	-2.50104	-2.47694	-2.47694	-2.47694	-2.47694	-2.47694	-2.47694	-2.50104	-2.50104	-2.52573	-2.52573	-2.52573	-2.52573	-2.52573	-2.52573	-2.52573	-2.52573	-2.52573	-2.52573	-2.52573
-2.95651	-2.91877	-2.84731	-2.78062	-2.7181	-2.68825	-2.65926	-2.65926	-2.65926	-2.65926	-2.63109	-2.63109	-2.63109	-2.60369	-2.60369	-2.60369	-2.57702	-2.57702	-2.55105	-2.55105	-2.55105	-2.55105	-2.55105	-2.55105	-2.52573	-2.52573	-2.52573	-2.50104	-2.50104	-2.50104	-2.50104	-2.47694	-2.47694	-2.47694	-2.47694	-2.47694	-2.47694	-2.50104	-2.50104	-2.52573	-2.52573	-2.52573	-2.52573	-2.52573	-2.52573	-2.52573	-2.52573	-2.52573	-2.52573	-2.52573
-2.95651	-2.91877	-2.84731	-2.78062	-2.7181	-2.68825	-2.68825	-2.65926	-2.65926	-2.65926	-2.65926	-2.63109	-2.63109	-2.60369	-2.60369	-2.57702	-2.57702	-2.57702	-2.55105	-2.55105	-2.55105	-2.55105	-2.55105	-2.52573	-2.52573	-2.52573	-2.52573	-2.50104	-2.50104	-2.50104	-2.50104	-2.47694	-2.47694	-2.47694	-2.47694	-2.47694	-2.47694	-2.50104	-2.50104	-2.50104	-2.52573	-2.52573	-2.52573	-2.52573	-2.50104	-2.50104	-2.52573	-2.52573	-2.52573	-2.50104
-2.95651	-2.91877	-2.84731	-2.81341	-2.74887	-2.7181	-2.68825	-2.68825	-2.68825	-2.68825	-2.65926	-2.65926	-2.63109	-2.63109	-2.60369	-2.60369	-2.57702	-2.57702	-2.55105	-2.55105	-2.55105	-2.55105	-2.55105	-2.52573	-2.52573	-2.52573	-2.50104	-2.50104	-2.50104	-2.50104	-2.47694	-2.47694	-2.47694	-2.47694	-2.47694	-2.47694	-2.47694	-2.50104	-2.50104	-2.50104	-2.52573	-2.52573	-2.50104	-2.50104	-2.50104	-2.50104	-2.50104	-2.50104	-2.50104	-2.50104
-2.95651	-2.91877	-2.8824	-2.81341	-2.78062	-2.7181	-2.7181	-2.7181	-2.7181	-2.68825	-2.68825	-2.65926	-2.65926	-2.63109	-2.63109	-2.60369	-2.57702	-2.57702	-2.55105	-2.55105	-2.55105	-2.55105	-2.55105	-2.55105	-2.52573	-2.52573	-2.52573	-2.50104	-2.50104	-2.50104	-2.50104	-2.47694	-2.47694	-2.47694	-2.47694	-2.47694	-2.47694	-2.50104	-2.50104	-2.50104	-2.50104	-2.50104	-2.50104	-2.50104	-2.50104	-2.50104	-2.50104	-2.50104	-2.50104	-2.50104
-2.99573	-2.95651	-2.8824	-2.84731	-2.78062	-2.74887	-2.74887	-2.7181	-2.7181	-2.7181	-2.7181	-2.68825	-2.65926	-2.65926	-2.63109	-2.60369	-2.60369	-2.57702	-2.57702	-2.55105	-2.55105	-2.55105	-2.55105	-2.55105	-2.52573	-2.52573	-2.52573	-2.52573	-2.50104	-2.50104	-2.50104	-2.50104	-2.47694	-2.47694	-2.47694	-2.47694	-2.47694	-2.50104	-2.50104	-2.50104	-2.52573	-2.50104	-2.50104	-2.50104	-2.50104	-2.50104	-2.50104	-2.50104	-2.50104	-2.50104
-2.99573	-2.95651	-2.91877	-2.84731	-2.81341	-2.78062	-2.74887	-2.74887	-2.74887	-2.74887	-2.7181	-2.7181	-2.68825	-2.65926	-2.63109	-2.63109	-2.60369	-2.60369	-2.57702	-2.57702	-2.57702	-2.55105	-2.55105	-2.55105	-2.55105	-2.52573	-2.52573	-2.52573	-2.52573	-2.52573	-2.50104	-2.50104	-2.50104	-2.50104	-2.47694	-2.50104	-2.50104	-2.50104	-2.50104	-2.52573	-2.52573	-2.52573	-2.50104	-2.50104	-2.50104	-2.50104	-2.50104	-2.50104	-2.50104	-2.47694
-2.99573	-2.95651	-2.91877	-2.84731	-2.81341	-2.78062	-2.78062	-2.74887	-2.74887	-2.74887	-2.74887	-2.7181	-2.68825	-2.68825	-2.65926	-2.63109	-2.60369	-2.60369	-2.57702	-2.57702	-2.57702	-2.57702	-2.57702	-2.55105	-2.55105	-2.55105	-2.55105	-2.52573	-2.52573	-2.52573	-2.52573	-2.50104	-2.50104	-2.50104	-2.50104	-2.50104	-2.50104	-2.50104	-2.52573	-2.52573	-2.52573	-2.52573	-2.52573	-2.50104	-2.50104	-2.50104	-2.50104	-2.50104	-2.50104	-2.47694
-2.99573	-2.95651	-2.91877	-2.8824	-2.81341	-2.78062	-2.78062	-2.74887	-2.74887	-2.74887	-2.74887	-2.7181	-2.7181	-2.68825	-2.65926	-2.63109	-2.63109	-2.60369	-2.60369	-2.57702	-2.57702	-2.57702	-2.57702	-2.57702	-2.55105	-2.55105	-2.55105	-2.55105	-2.55105	-2.52573	-2.52573	-2.52573	-2.52573	-2.50104	-2.50104	-2.50104	-2.50104	-2.52573	-2.52573	-2.52573	-2.52573	-2.52573	-2.52573	-2.52573	-2.50104	-2.50104	-2.50104	-2.50104	-2.50104	-2.47694
-2.99573	-2.95651	-2.91877	-2.84731	-2.81341	-2.78062	-2.78062	-2.74887	-2.74887	-2.74887	-2.74887	-2.7181	-2.7181	-2.68825	-2.65926	-2.63109	-2.63109	-2.60369	-2.60369	-2.57702	-2.57702	-2.57702	-2.57702	-2.57702	-2.57702	-2.55105	-2.55105	-2.55105	-2.55105	-2.55105	-2.52573	-2.52573	-2.52573	-2.52573	-2.50104	-2.52573	-2.52573	-2.52573	-2.52573	-2.52573	-2.52573	-2.52573	-2.52573	-2.52573	-2.50104	-2.50104	-2.50104	-2.50104	-2.50104	-2.47694
-2.99573	-2.95651	-2.91877	-2.8824	-2.81341	-2.78062	-2.78062	-2.74887	-2.74887	-2.74887	-2.74887	-2.74887	-2.7181	-2.68825	-2.65926	-2.65926	-2.63109	-2.60369	-2.60369	-2.60369	-2.57702	-2.57702	-2.57702	-2.57702	-2.57702	-2.57702	-2.55105	-2.55105	-2.55105	-2.55105	-2.55105	-2.52573	-2.52573	-2.52573	-2.52573	-2.52573	-2.52573	-2.52573	-2.52573	-2.55105	-2.55105	-2.52573	-2.52573	-2.52573	-2.52573	-2.50104	-2.50104	-2.50104	-2.50104	-2.47694
-3.03655	-2.99573	-2.91877	-2.8824	-2.81341	-2.78062	-2.78062	-2.78062	-2.78062	-2.78062	-2.74887	-2.74887	-2.7181	-2.7181	-2.68825	-2.65926	-2.63109	-2.63109	-2.60369	-2.60369	-2.60369	-2.60369	-2.57702	-2.57702	-2.57702	-2.57702	-2.57702	-2.57702	-2.55105	-2.55105	-2.55105	-2.55105	-2.52573	-2.52573	-2.52573	-2.52573	-2.52573	-2.52573	-2.55105	-2.55105	-2.55105	-2.55105	-2.52573	-2.52573	-2.52573	-2.50104	-2.50104	-2.50104	-2.50104	-2.47694
-3.03655	-2.99573	-2.95651	-2.8824	-2.84731	-2.81341	-2.78062	-2.78062	-2.78062	-2.78062	-2.78062	-2.74887	-2.74887	-2.7181	-2.68825	-2.68825	-2.65926	-2.63109	-2.63109	-2.60369	-2.60369	-2.60369	-2.60369	-2.60369	-2.57702	-2.57702	-2.57702	-2.57702	-2.57702	-2.57702	-2.55105	-2.55105	-2.55105	-2.52573	-2.52573	-2.52573	-2.52573	-2.55105	-2.55105	-2.55105	-2.55105	-2.55105	-2.55105	-2.52573	-2.52573	-2.52573	-2.50104	-2.50104	-2.50104	-2.47694
-3.07911	-3.03655	-2.99573	-2.91877	-2.8824	-2.84731	-2.81341	-2.81341	-2.81341	-2.81341	-2.81341	-2.78062	-2.78062	-2.74887	-2.7181	-2.68825	-2.65926	-2.65926	-2.63109	-2.63109	-2.63109	-2.60369	-2.60369	-2.60369	-2.60369	-2.60369	-2.57702	-2.57702	-2.57702	-2.57702	-2.57702	-2.55105	-2.55105	-2.55105	-2.55105	-2.55105	-2.55105	-2.55105	-2.55105	-2.55105	-2.55105	-2.55105	-2.55105	-2.52573	-2.52573	-2.52573	-2.50104	-2.50104	-2.50104	-2.47694
-3.12357	-3.07911	-3.03655	-2.95651	-2.91877	-2.8824	-2.84731	-2.84731	-2.84731	-2.84731	-2.81341	-2.81341	-2.78062	-2.78062	-2.74887	-2.7181	-2.68825	-2.65926	-2.65926	-2.63109	-2.63109	-2.63109	-2.63109	-2.60369	-2.60369	-2.60369	-2.60369	-2.60369	-2.60369	-2.57702	-2.57702	-2.57702	-2.55105	-2.55105	-2.55105	-2.55105	-2.55105	-2.55105	-2.55105	-2.57702	-2.57702	-2.55105	-2.55105	-2.55105	-2.52573	-2.52573	-2.52573	-2.50104	-2.50104	-2.50104
-3.12357	-3.12357	-3.03655	-2.99573	-2.91877	-2.8824	-2.8824	-2.8824	-2.8824	-2.8824	-2.84731	-2.84731	-2.81341	-2.78062	-2.74887	-2.74887	-2.7181	-2.68825	-2.65926	-2.65926	-2.65926	-2.63109	-2.63109	-2.63109	-2.63109	-2.63109	-2.60369	-2.60369	-2.60369	-2.60369	-2.57702	-2.57702	-2.57702	-2.55105	-2.55105	-2.55105	-2.55105	-2.57702	-2.57702	-2.57702	-2.57702	-2.57702	-2.55105	-2.55105	-2.52573	-2.52573	-2.52573	-2.52573	-2.50104	-2.50104
-3.17009	-3.12357	-3.07911	-2.99573	-2.95651	-2.91877	-2.8824	-2.8824	-2.8824	-2.8824	-2.8824	-2.84731	-2.84731	-2.81341	-2.78062	-2.74887	-2.7181	-2.7181	-2.68825	-2.65926	-2.65926	-2.65926	-2.65926	-2.63109	-2.63109	-2.63109	-2.63109	-2.63109	-2.60369	-2.60369	-2.60369	-2.57702	-2.57702	-2.57702	-2.57702	-2.57702	-2.57702	-2.57702	-2.57702	-2.57702	-2.57702	-2.57702	-2.57702	-2.55105	-2.55105	-2.52573	-2.52573	-2.52573	-2.52573	-2.50104
-3.17009	-3.12357	-3.07911	-3.03655	-2.95651	-2.91877	-2.91877	-2.91877	-2.91877	-2.91877	-2.8824	-2.8824	-2.84731	-2.81341	-2.78062	-2.78062	-2.74887	-2.7181	-2.68825	-2.68825	-2.65926	-2.65926	-2.65926	-2.65926	-2.63109	-2.63109	-2.63109	-2.63109	-2.63109	-2.63109	-2.60369	-2.60369	-2.60369	-2.57702	-2.57702	-2.57702	-2.57702	-2.60369	-2.60369	-2.60369	-2.60369	-2.60369	-2.57702	-2.57702	-2.55105	-2.55105	-2.55105	-2.52573	-2.52573	-2.52573
-3.17009	-3.12357	-3.07911	-3.03655	-2.99573	-2.95651	-2.91877	-2.91877	-2.91877	-2.91877	-2.91877	-2.8824	-2.84731	-2.81341	-2.81341	-2.78062	-2.74887	-2.7181	-2.7181	-2.68825	-2.68825	-2.65926	-2.65926	-2.65926	-2.65926	-2.65926	-2.63109	-2.63109	-2.63109	-2.63109	-2.63109	-2.60369	-2.60369	-2.60369	-2.57702	-2.60369	-2.60369	-2.60369	-2.60369	-2.60369	-2.60369	-2.60369	-2.60369	-2.57702	-2.57702	-2.57702	-2.55105	-2.55105	-2.55105	-2.52573
-3.17009	-3.12357	-3.07911	-3.03655	-2.99573	-2.95651	-2.91877	-2.91877	-2.91877	-2.91877	-2.91877	-2.8824	-2.84731	-2.84731	-2.81341	-2.78062	-2.74887	-2.74887	-2.7181	-2.68825	-2.68825	-2.68825	-2.65926	-2.65926	-2.65926	-2.65926	-2.65926	-2.63109	-2.63109	-2.63109	-2.63109	-2.63109	-2.60369	-2.60369	-2.60369	-2.60369	-2.60369	-2.63109	-2.63109	-2.63109	-2.63109	-2.63109	-2.60369	-2.60369	-2.60369	-2.57702	-2.57702	-2.57702	-2.55105	-2.55105
-3.17009	-3.12357	-3.07911	-3.03655	-2.99573	-2.95651	-2.95651	-2.95651	-2.95651	-2.91877	-2.91877	-2.8824	-2.8824	-2.84731	-2.81341	-2.78062	-2.78062	-2.74887	-2.7181	-2.7181	-2.68825	-2.68825	-2.65926	-2.65926	-2.65926	-2.65926	-2.65926	-2.65926	-2.65926	-2.63109	-2.63109	-2.63109	-2.60369	-2.60369	-2.60369	-2.60369	-2.63109	-2.63109	-2.63109	-2.65926	-2.65926	-2.63109	-2.63109	-2.63109	-2.60369	-2.60369	-2.57702	-2.57702	-2.57702	-2.55105
-3.17009	-3.12357	-3.12357	-3.03655	-2.99573	-2.99573	-2.95651	-2.95651	-2.95651	-2.95651	-2.91877	-2.91877	-2.8824	-2.84731	-2.81341	-2.81341	-2.78062	-2.74887	-2.74887	-2.7181	-2.7181	-2.68825	-2.68825	-2.65926	-2.65926	-2.65926	-2.65926	-2.65926	-2.65926	-2.65926	-2.63109	-2.63109	-2.63109	-2.60369	-2.60369	-2.63109	-2.63109	-2.65926	-2.65926	-2.65926	-2.65926	-2.65926	-2.63109	-2.63109	-2.63109	-2.60369	-2.60369	-2.60369	-2.57702	-2.57702
-3.17009	-3.12357	-3.12357	-3.07911	-3.03655	-2.99573	-2.95651	-2.95651	-2.95651	-2.95651	-2.95651	-2.91877	-2.8824	-2.8824	-2.84731	-2.81341	-2.78062	-2.78062	-2.74887	-2.7181	-2.7181	-2.68825	-2.68825	-2.68825	-2.65926	-2.65926	-2.65926	-2.65926	-2.65926	-2.65926	-2.63109	-2.63109	-2.63109	-2.63109	-2.63109	-2.63109	-2.63109	-2.65926	-2.65926	-2.65926	-2.65926	-2.65926	-2.65926	-2.63109	-2.63109	-2.63109	-2.60369	-2.60369	-2.57702	-2.57702
-3.17009	-3.12357	-3.12357	-3.07911	-3.03655	-2.99573	-2.99573	-2.99573	-2.99573	-2.99573	-2.95651	-2.95651	-2.91877	-2.8824	-2.84731	-2.81341	-2.81341	-2.78062	-2.74887	-2.74887	-2.7181	-2.7181	-2.68825	-2.68825	-2.65926	-2.65926	-2.65926	-2.65926	-2.65926	-2.65926	-2.65926	-2.63109	-2.63109	-2.63109	-2.63109	-2.63109	-2.65926	-2.65926	-2.68825	-2.68825	-2.68825	-2.65926	-2.65926	-2.65926	-2.63109	-2.63109	-2.60369	-2.60369	-2.60369	-2.57702
-3.17009	-3.12357	-3.12357	-3.07911	-3.03655	-3.03655	-2.99573	-2.99573	-2.99573	-2.99573	-2.95651	-2.95651	-2.91877	-2.8824	-2.84731	-2.84731	-2.81341	-2.78062	-2.78062	-2.74887	-2.74887	-2.7181	-2.68825	-2.68825	-2.65926	-2.65926	-2.65926	-2.65926	-2.65926	-2.65926	-2.65926	-2.63109	-2.63109	-2.63109	-2.63109	-2.63109	-2.65926	-2.65926	-2.68825	-2.68825	-2.68825	-2.65926	-2.65926	-2.65926	-2.63109	-2.63109	-2.63109	-2.60369	-2.60369	-2.57702
-3.12357	-3.12357	-3.12357	-3.07911	-3.03655	-2.99573	-2.99573	-2.99573	-2.99573	-2.99573	-2.95651	-2.95651	-2.91877	-2.8824	-2.84731	-2.84731	-2.81341	-2.78062	-2.78062	-2.74887	-2.74887	-2.7181	-2.68825	-2.68825	-2.65926	-2.65926	-2.65926	-2.65926	-2.65926	-2.65926	-2.65926	-2.63109	-2.63109	-2.63109	-2.63109	-2.63109	-2.65926	-2.65926	-2.68825	-2.68825	-2.68825	-2.65926	-2.65926	-2.65926	-2.63109	-2.63109	-2.63109	-2.60369	-2.60369	-2.57702
-3.12357	-3.12357	-3.12357	-3.07911	-3.03655	-2.99573	-2.99573	-2.99573	-2.99573	-2.95651	-2.95651	-2.95651	-2.91877	-2.8824	-2.84731	-2.81341	-2.81341	-2.78062	-2.78062	-2.74887	-2.7181	-2.7181	-2.68825	-2.68825	-2.65926	-2.65926	-2.65926	-2.65926	-2.65926	-2.65926	-2.63109	-2.63109	-2.63109	-2.63109	-2.63109	-2.63109	-2.65926	-2.65926	-2.68825	-2.68825	-2.68825	-2.65926	-2.65926	-2.65926	-2.63109	-2.63109	-2.63109	-2.60369	-2.60369	-2.57702
-3.12357	-3.12357	-3.07911	-3.03655	-3.03655	-2.99573	-2.95651	-2.95651	-2.95651	-2.95651	-2.95651	-2.91877	-2.8824	-2.8824	-2.84731	-2.81341	-2.78062	-2.78062	-2.74887	-2.74887	-2.7181	-2.68825	-2.68825	-2.65926	-2.65926	-2.63109	-2.63109	-2.65926	-2.65926	-2.63109	-2.63109	-2.63109	-2.63109	-2.60369	-2.63109	-2.63109	-2.63109	-2.65926	-2.65926	-2.65926	-2.65926	-2.65926	-2.65926	-2.63109	-2.63109	-2.63109	-2.60369	-2.60369	-2.57702	-2.57702
-3.12357	-3.12357	-3.07911	-3.03655	-2.99573	-2.99573	-2.95651	-2.95651	-2.95651	-2.95651	-2.91877	-2.91877	-2.8824	-2.84731	-2.81341	-2.81341	-2.78062	-2.74887	-2.74887	-2.7181	-2.7181	-2.68825	-2.65926	-2.65926	-2.63109	-2.63109	-2.63109	-2.63109	-2.63109	-2.63109	-2.63109	-2.63109	-2.60369	-2.60369	-2.60369	-2.63109	-2.63109	-2.65926	-2.65926	-2.65926	-2.65926	-2.65926	-2.65926	-2.63109	-2.63109	-2.63109	-2.60369	-2.60369	-2.57702	-2.57702
-3.07911	-3.07911	-3.07911	-3.03655	-2.99573	-2.95651	-2.95651	-2.95651	-2.95651	-2.95651	-2.91877	-2.91877	-2.8824	-2.84731	-2.81341	-2.78062	-2.78062	-2.74887	-2.74887	-2.7181	-2.7181	-2.68825	-2.65926	-2.65926	-2.63109	-2.63109	-2.63109	-2.63109	-2.63109	-2.63109	-2.63109	-2.63109	-2.60369	-2.60369	-2.60369	-2.63109	-2.63109	-2.65926	-2.65926	-2.65926	-2.65926	-2.65926	-2.65926	-2.63109	-2.63109	-2.63109	-2.60369	-2.60369	-2.57702	-2.55105
-3.07911	-3.07911	-3.03655	-3.03655	-2.99573	-2.95651	-2.95651	-2.91877	-2.91877	-2.91877	-2.91877	-2.8824	-2.8824	-2.84731	-2.81341	-2.78062	-2.74887	-2.74887	-2.7181	-2.7181	-2.7181	-2.68825	-2.65926	-2.65926	-2.63109	-2.63109	-2.63109	-2.63109	-2.63109	-2.63109	-2.63109	-2.63109	-2.60369	-2.60369	-2.60369	-2.63109	-2.63109	-2.65926	-2.65926	-2.65926	-2.65926	-2.65926	-2.65926	-2.63109	-2.63109	-2.63109	-2.60369	-2.60369	-2.57702	-2.55105
-3.03655	-3.03655	-3.03655	-2.99573	-2.99573	-2.95651	-2.91877	-2.91877	-2.91877	-2.91877	-2.91877	-2.8824	-2.84731	-2.84731	-2.81341	-2.78062	-2.74887	-2.74887	-2.7181	-2.7181	-2.7181	-2.68825	-2.65926	-2.65926	-2.63109	-2.63109	-2.63109	-2.63109	-2.63109	-2.63109	-2.63109	-2.63109	-2.60369	-2.60369	-2.60369	-2.63109	-2.63109	-2.65926	-2.65926	-2.65926	-2.65926	-2.65926	-2.65926	-2.63109	-2.63109	-2.63109	-2.60369	-2.60369	-2.57702	-2.55105
-3.03655	-3.03655	-3.03655	-2.99573	-2.95651	-2.95651	-2.91877	-2.91877	-2.91877	-2.91877	-2.91877	-2.8824	-2.84731	-2.81341	-2.81341	-2.78062	-2.74887	-2.74887	-2.74887	-2.7181	-2.7181	-2.68825	-2.68825	-2.65926	-2.65926	-2.63109	-2.63109	-2.63109	-2.63109	-2.63109	-2.63109	-2.63109	-2.63109	-2.60369	-2.63109	-2.63109	-2.63109	-2.65926	-2.65926	-2.65926	-2.65926	-2.65926	-2.65926	-2.65926	-2.63109	-2.63109	-2.60369	-2.60369	-2.57702	-2.55105
-3.03655	-3.03655	-3.03655	-2.99573	-2.95651	-2.91877	-2.91877	-2.91877	-2.91877	-2.91877	-2.8824	-2.8824	-2.84731	-2.81341	-2.81341	-2.78062	-2.74887	-2.74887	-2.74887	-2.7181	-2.7181	-2.68825	-2.68825	-2.65926	-2.65926	-2.63109	-2.63109	-2.63109	-2.63109	-2.63109	-2.63109	-2.63109	-2.63109	-2.63109	-2.63109	-2.63109	-2.65926	-2.65926	-2.68825	-2.68825	-2.68825	-2.65926	-2.65926	-2.65926	-2.63109	-2.63109	-2.63109	-2.60369	-2.57702	-2.57702
-3.03655	-3.03655	-3.03655	-2.99573	-2.95651	-2.91877	-2.91877	-2.91877	-2.8824	-2.8824	-2.8824	-2.8824	-2.84731	-2.81341	-2.78062	-2.78062	-2.74887	-2.74887	-2.7181	-2.7181	-2.7181	-2.7181	-2.68825	-2.65926	-2.65926	-2.65926	-2.63109	-2.65926	-2.65926	-2.65926	-2.63109	-2.63109	-2.63109	-2.63109	-2.63109	-2.65926	-2.65926	-2.68825	-2.68825	-2.68825	-2.68825	-2.68825	-2.65926	-2.65926	-2.65926	-2.63109	-2.63109	-2.60369	-2.60369	-2.57702
-3.03655	-3.03655	-3.03655	-2.99573	-2.95651	-2.91877	-2.91877	-2.8824	-2.8824	-2.8824	-2.8824	-2.8824	-2.84731	-2.81341	-2.78062	-2.78062	-2.74887	-2.74887	-2.7181	-2.7181	-2.7181	-2.7181	-2.68825	-2.65926	-2.65926	-2.65926	-2.65926	-2.65926	-2.65926	-2.65926	-2.65926	-2.63109	-2.63109	-2.63109	-2.63109	-2.65926	-2.65926	-2.68825	-2.68825	-2.68825	-2.68825	-2.68825	-2.68825	-2.65926	-2.65926	-2.65926	-2.63109	-2.63109	-2.60369	-2.57702
-3.03655	-3.03655	-3.03655	-2.99573	-2.95651	-2.91877	-2.91877	-2.91877	-2.8824	-2.8824	-2.8824	-2.8824	-2.84731	-2.81341	-2.78062	-2.78062	-2.74887	-2.74887	-2.7181	-2.7181	-2.7181	-2.7181	-2.68825	-2.68825	-2.65926	-2.65926	-2.65926	-2.65926	-2.65926	-2.65926	-2.65926	-2.65926	-2.65926	-2.65926	-2.65926	-2.65926	-2.68825	-2.68825	-2.68825	-2.7181	-2.68825	-2.68825	-2.68825	-2.68825	-2.65926	-2.65926	-2.65926	-2.63109	-2.60369	-2.57702
-3.03655	-3.03655	-3.03655	-2.99573	-2.95651	-2.95651	-2.91877	-2.91877	-2.91877	-2.91877	-2.8824	-2.8824	-2.84731	-2.81341	-2.78062	-2.78062	-2.74887	-2.74887	-2.74887	-2.7181	-2.7181	-2.7181	-2.68825	-2.68825	-2.65926	-2.65926	-2.65926	-2.65926	-2.65926	-2.65926	-2.65926	-2.65926	-2.65926	-2.65926	-2.65926	-2.65926	-2.68825	-2.68825	-2.7181	-2.7181	-2.7181	-2.7181	-2.68825	-2.68825	-2.68825	-2.65926	-2.65926	-2.63109	-2.63109	-2.60369
-2.99573	-3.03655	-3.03655	-2.99573	-2.95651	-2.95651	-2.91877	-2.91877	-2.91877	-2.91877	-2.91877	-2.8824	-2.84731	-2.84731	-2.81341	-2.78062	-2.78062	-2.74887	-2.74887	-2.74887	-2.7181	-2.7181	-2.7181	-2.68825	-2.68825	-2.65926	-2.65926	-2.65926	-2.65926	-2.65926	-2.65926	-2.65926	-2.65926	-2.65926	-2.65926	-2.68825	-2.68825	-2.7181	-2.7181	-2.7181	-2.7181	-2.7181	-2.7181	-2.68825	-2.68825	-2.68825	-2.65926	-2.65926	-2.63109	-2.60369
-2.99573	-3.03655	-3.03655	-2.99573	-2.99573	-2.95651	-2.95651	-2.91877	-2.91877	-2.91877	-2.91877	-2.91877	-2.8824	-2.84731	-2.81341	-2.81341	-2.78062	-2.78062	-2.74887	-2.74887	-2.74887	-2.7181	-2.7181	-2.68825	-2.68825	-2.68825	-2.68825	-2.68825	-2.68825	-2.68825	-2.68825	-2.68825	-2.68825	-2.68825	-2.68825	-2.68825	-2.7181	-2.7181	-2.7181	-2.7181	-2.7181	-2.7181	-2.7181	-2.7181	-2.68825	-2.68825	-2.68825	-2.65926	-2.63109	-2.63109
-2.99573	-3.03655	-3.03655	-2.99573	-2.99573	-2.95651	-2.95651	-2.95651	-2.95651	-2.95651	-2.91877	-2.91877	-2.8824	-2.84731	-2.84731	-2.81341	-2.78062	-2.78062	-2.78062	-2.74887	-2.74887	-2.74887	-2.7181	-2.7181	-2.68825	-2.68825	-2.68825	-2.68825	-2.68825	-2.68825	-2.68825	-2.68825	-2.68825	-2.68825	-2.68825	-2.7181	-2.7181	-2.7181	-2.74887	-2.74887	-2.74887	-2.74887	-2.7181	-2.7181	-2.7181	-2.7181	-2.68825	-2.68825	-2.65926	-2.63109
-2.99573	-3.03655	-3.03655	-2.99573	-2.99573	-2.95651	-2.95651	-2.95651	-2.95651	-2.95651	-2.91877	-2.91877	-2.8824	-2.84731	-2.84731	-2.81341	-2.81341	-2.78062	-2.78062	-2.78062	-2.74887	-2.74887	-2.7181	-2.7181	-2.68825	-2.68825	-2.68825	-2.68825	-2.68825	-2.68825	-2.68825	-2.68825	-2.68825	-2.7181	-2.7181	-2.7181	-2.7181	-2.74887	-2.74887	-2.74887	-2.74887	-2.74887	-2.74887	-2.74887	-2.7181	-2.7181	-2.7181	-2.68825	-2.65926	-2.65926
-3.03655	-3.03655	-3.03655	-3.03655	-2.99573	-2.95651	-2.95651	-2.95651	-2.95651	-2.95651	-2.95651	-2.91877	-2.8824	-2.84731	-2.84731	-2.81341	-2.81341	-2.78062	-2.78062	-2.78062	-2.74887	-2.74887	-2.7181	-2.7181	-2.68825	-2.68825	-2.68825	-2.68825	-2.68825	-2.7181	-2.7181	-2.7181	-2.7181	-2.7181	-2.7181	-2.7181	-2.74887	-2.74887	-2.74887	-2.74887	-2.74887	-2.74887	-2.74887	-2.74887	-2.74887	-2.7181	-2.7181	-2.68825	-2.68825	-2.65926
-3.03655	-3.03655	-3.03655	-3.03655	-2.99573	-2.99573	-2.95651	-2.95651	-2.95651	-2.95651	-2.95651	-2.91877	-2.8824	-2.84731	-2.84731	-2.81341	-2.81341	-2.78062	-2.78062	-2.78062	-2.74887	-2.74887	-2.7181	-2.7181	-2.68825	-2.68825	-2.68825	-2.68825	-2.7181	-2.7181	-2.7181	-2.7181	-2.7181	-2.7181	-2.7181	-2.7181	-2.74887	-2.74887	-2.74887	-2.78062	-2.78062	-2.78062	-2.78062	-2.74887	-2.74887	-2.74887	-2.7181	-2.7181	-2.68825	-2.68825
-3.03655	-3.03655	-3.03655	-3.03655	-2.99573	-2.99573	-2.95651	-2.95651	-2.95651	-2.95651	-2.95651	-2.91877	-2.8824	-2.84731	-2.84731	-2.81341	-2.78062	-2.78062	-2.78062	-2.78062	-2.74887	-2.74887	-2.7181	-2.7181	-2.68825	-2.68825	-2.68825	-2.68825	-2.7181	-2.7181	-2.7181	-2.7181	-2.7181	-2.7181	-2.7181	-2.7181	-2.74887	-2.74887	-2.78062	-2.78062	-2.78062	-2.78062	-2.78062	-2.78062	-2.74887	-2.74887	-2.74887	-2.7181	-2.7181	-2.68825
-3.03655	-3.03655	-3.03655	-3.03655	-2.99573	-2.99573	-2.95651	-2.95651	-2.95651	-2.95651	-2.95651	-2.91877	-2.8824	-2.84731	-2.84731	-2.81341	-2.78062	-2.78062	-2.78062	-2.74887	-2.74887	-2.74887	-2.7181	-2.7181	-2.68825	-2.68825	-2.68825	-2.68825	-2.7181	-2.7181	-2.7181	-2.7181	-2.7181	-2.7181	-2.7181	-2.7181	-2.74887	-2.74887	-2.78062	-2.78062	-2.78062	-2.78062	-2.78062	-2.78062	-2.74887	-2.74887	-2.74887	-2.7181	-2.7181	-2.68825
-3.03655	-3.07911	-3.07911	-3.03655	-3.03655	-2.99573	-2.99573	-2.99573	-2.95651	-2.95651	-2.95651	-2.91877	-2.8824	-2.84731	-2.84731	-2.81341	-2.78062	-2.78062	-2.78062	-2.74887	-2.74887	-2.74887	-2.7181	-2.7181	-2.68825	-2.68825	-2.68825	-2.68825	-2.7181	-2.7181	-2.7181	-2.7181	-2.7181	-2.7181	-2.7181	-2.7181	-2.74887	-2.74887	-2.78062	-2.78062	-2.78062	-2.78062	-2.78062	-2.78062	-2.78062	-2.74887	-2.74887	-2.74887	-2.7181	-2.68825
-3.07911	-3.07911	-3.07911	-3.03655	-3.03655	-2.99573	-2.99573	-2.99573	-2.99573	-2.99573	-2.95651	-2.91877	-2.8824	-2.84731	-2.84731	-2.81341	-2.81341	-2.78062	-2.78062	-2.78062	-2.74887	-2.74887	-2.7181	-2.7181	-2.68825	-2.68825	-2.68825	-2.7181	-2.7181	-2.7181	-2.7181	-2.7181	-2.7181	-2.7181	-2.7181	-2.7181	-2.74887	-2.74887	-2.78062	-2.78062	-2.78062	-2.78062	-2.78062	-2.78062	-2.78062	-2.74887	-2.74887	-2.74887	-2.7181	-2.68825
-3.07911	-3.07911	-3.07911	-3.03655	-3.03655	-2.99573	-2.99573	-2.99573	-2.99573	-2.99573	-2.95651	-2.95651	-2.91877	-2.8824	-2.84731	-2.81341	-2.81341	-2.78062	-2.78062	-2.78062	-2.74887	-2.74887	-2.7181	-2.7181	-2.7181	-2.7181	-2.7181	-2.7181	-2.7181	-2.7181	-2.7181	-2.7181	-2.7181	-2.7181	-2.7181	-2.74887	-2.74887	-2.74887	-2.78062	-2.78062	-2.78062	-2.78062	-2.78062	-2.78062	-2.78062	-2.78062	-2.74887	-2.74887	-2.7181	-2.7181
-3.07911	-3.07911	-3.07911	-3.07911	-3.03655	-2.99573	-2.99573	-2.99573	-2.99573	-2.99573	-2.99573	-2.95651	-2.91877	-2.8824	-2.84731	-2.81341	-2.81341	-2.81341	-2.78062	-2.78062	-2.78062	-2.74887	-2.74887	-2.7181	-2.7181	-2.7181	-2.7181	-2.7181	-2.74887	-2.74887	-2.74887	-2.74887	-2.74887	-2.74887	-2.74887	-2.74887	-2.74887	-2.78062	-2.78062	-2.78062	-2.78062	-2.78062	-2.78062	-2.78062	-2.78062	-2.78062	-2.78062	-2.74887	-2.74887	-2.7181
-3.07911	-3.07911	-3.07911	-3.07911	-3.03655	-3.03655	-2.99573	-2.99573	-2.99573	-2.99573	-2.99573	-2.95651	-2.91877	-2.8824	-2.84731	-2.84731	-2.81341	-2.81341	-2.81341	-2.78062	-2.78062	-2.78062	-2.74887	-2.74887	-2.7181	-2.7181	-2.7181	-2.74887	-2.74887	-2.74887	-2.74887	-2.74887	-2.74887	-2.74887	-2.74887	-2.74887	-2.74887	-2.78062	-2.78062	-2.78062	-2.78062	-2.78062	-2.78062	-2.78062	-2.78062	-2.78062	-2.78062	-2.74887	-2.74887	-2.7181
-3.03655	-3.07911	-3.07911	-3.07911	-3.03655	-3.03655	-3.03655	-3.03655	-3.03655	-3.03655	-2.99573	-2.95651	-2.91877	-2.8824	-2.84731	-2.84731	-2.81341	-2.81341	-2.81341	-2.81341	-2.78062	-2.78062	-2.74887	-2.74887	-2.74887	-2.7181	-2.74887	-2.74887	-2.74887	-2.74887	-2.74887	-2.74887	-2.74887	-2.74887	-2.74887	-2.78062	-2.78062	-2.78062	-2.78062	-2.81341	-2.81341	-2.81341	-2.81341	-2.81341	-2.81341	-2.78062	-2.78062	-2.78062	-2.74887	-2.74887
-3.03655	-3.07911	-3.07911	-3.07911	-3.03655	-3.03655	-3.03655	-3.03655	-3.03655	-3.03655	-2.99573	-2.95651	-2.91877	-2.8824	-2.84731	-2.84731	-2.81341	-2.81341	-2.81341	-2.81341	-2.78062	-2.78062	-2.74887	-2.74887	-2.74887	-2.74887	-2.74887	-2.74887	-2.74887	-2.74887	-2.74887	-2.74887	-2.74887	-2.74887	-2.74887	-2.78062	-2.78062	-2.78062	-2.81341	-2.81341	-2.81341	-2.81341	-2.81341	-2.81341	-2.81341	-2.81341	-2.81341	-2.78062	-2.78062	-2.74887
-3.03655	-3.03655	-3.03655	-3.03655	-3.03655	-3.03655	-2.99573	-2.99573	-3.03655	-2.99573	-2.99573	-2.95651	-2.91877	-2.8824	-2.84731	-2.81341	-2.81341	-2.81341	-2.81341	-2.78062	-2.78062	-2.78062	-2.74887	-2.74887	-2.74887	-2.7181	-2.74887	-2.74887	-2.74887	-2.74887	-2.74887	-2.74887	-2.74887	-2.74887	-2.78062	-2.78062	-2.78062	-2.81341	-2.81341	-2.81341	-2.81341	-2.81341	-2.81341	-2.81341	-2.81341	-2.81341	-2.81341	-2.81341	-2.78062	-2.78062
-2.99573	-3.03655	-3.03655	-3.03655	-3.03655	-2.99573	-2.99573	-2.99573	-2.99573	-2.99573	-2.99573	-2.95651	-2.91877	-2.8824	-2.84731	-2.81341	-2.81341	-2.78062	-2.78062	-2.78062	-2.78062	-2.78062	-2.74887	-2.74887	-2.7181	-2.7181	-2.7181	-2.74887	-2.74887	-2.74887	-2.74887	-2.74887	-2.74887	-2.74887	-2.78062	-2.78062	-2.78062	-2.81341	-2.81341	-2.81341	-2.81341	-2.81341	-2.81341	-2.81341	-2.81341	-2.81341	-2.81341	-2.81341	-2.78062	-2.78062
-2.99573	-3.03655	-3.03655	-3.03655	-2.99573	-2.99573	-2.99573	-2.99573	-2.99573	-2.99573	-2.95651	-2.91877	-2.8824	-2.84731	-2.81341	-2.78062	-2.78062	-2.78062	-2.78062	-2.78062	-2.78062	-2.74887	-2.74887	-2.7181	-2.7181	-2.7181	-2.7181	-2.74887	-2.74887	-2.74887	-2.74887	-2.74887	-2.74887	-2.74887	-2.74887	-2.78062	-2.78062	-2.81341	-2.81341	-2.81341	-2.81341	-2.81341	-2.81341	-2.81341	-2.81341	-2.81341	-2.81341	-2.81341	-2.81341	-2.78062
-2.99573	-2.99573	-2.99573	-2.99573	-2.99573	-2.99573	-2.99573	-2.99573	-2.99573	-2.95651	-2.95651	-2.91877	-2.8824	-2.84731	-2.81341	-2.78062	-2.78062	-2.78062	-2.78062	-2.74887	-2.74887	-2.74887	-2.74887	-2.7181	-2.7181	-2.7181	-2.7181	-2.7181	-2.74887	-2.74887	-2.74887	-2.74887	-2.74887	-2.74887	-2.74887	-2.78062	-2.78062	-2.81341	-2.81341	-2.81341	-2.81341	-2.81341	-2.81341	-2.81341	-2.81341	-2.81341	-2.81341	-2.81341	-2.81341	-2.78062
-2.99573	-2.99573	-2.99573	-2.99573	-2.99573	-2.99573	-2.95651	-2.95651	-2.95651	-2.95651	-2.91877	-2.8824	-2.84731	-2.81341	-2.78062	-2.78062	-2.74887	-2.74887	-2.74887	-2.74887	-2.74887	-2.74887	-2.7181	-2.7181	-2.7181	-2.7181	-2.7181	-2.7181	-2.74887	-2.74887	-2.74887	-2.74887	-2.74887	-2.74887	-2.74887	-2.78062	-2.78062	-2.78062	-2.81341	-2.81341	-2.81341	-2.81341	-2.81341	-2.81341	-2.81341	-2.81341	-2.81341	-2.81341	-2.78062	-2.78062
-2.99573	-2.99573	-2.99573	-2.99573	-2.99573	-2.95651	-2.95651	-2.95651	-2.95651	-2.95651	-2.91877	-2.8824	-2.84731	-2.81341	-2.78062	-2.74887	-2.74887	-2.74887	-2.74887	-2.74887	-2.74887	-2.74887	-2.7181	-2.7181	-2.7181	-2.7181	-2.7181	-2.7181	-2.74887	-2.74887	-2.74887	-2.74887	-2.74887	-2.74887	-2.74887	-2.78062	-2.78062	-2.78062	-2.81341	-2.81341	-2.81341	-2.81341	-2.81341	-2.81341	-2.81341	-2.81341	-2.81341	-2.81341	-2.78062	-2.78062
-2.99573	-2.99573	-2.99573	-2.99573	-2.99573	-2.95651	-2.95651	-2.95651	-2.95651	-2.91877	-2.91877	-2.8824	-2.84731	-2.81341	-2.78062	-2.74887	-2.74887	-2.74887	-2.74887	-2.74887	-2.74887	-2.74887	-2.7181	-2.7181	-2.7181	-2.7181	-2.7181	-2.7181	-2.74887	-2.74887	-2.74887	-2.74887	-2.74887	-2.74887	-2.74887	-2.78062	-2.78062	-2.78062	-2.81341	-2.81341	-2.81341	-2.81341	-2.81341	-2.81341	-2.81341	-2.81341	-2.81341	-2.81341	-2.78062	-2.78062
-2.99573	-2.99573	-2.99573	-2.99573	-2.95651	-2.95651	-2.95651	-2.91877	-2.91877	-2.91877	-2.91877	-2.8824	-2.84731	-2.81341	-2.78062	-2.74887	-2.74887	-2.74887	-2.74887	-2.74887	-2.74887	-2.74887	-2.74887	-2.7181	-2.7181	-2.7181	-2.7181	-2.7181	-2.74887	-2.74887	-2.74887	-2.74887	-2.74887	-2.74887	-2.74887	-2.78062	-2.78062	-2.78062	-2.81341	-2.81341	-2.81341	-2.81341	-2.81341	-2.81341	-2.81341	-2.81341	-2.81341	-2.78062	-2.78062	-2.78062
-3.03655	-2.99573	-2.99573	-2.99573	-2.95651	-2.95651	-2.91877	-2.91877	-2.91877	-2.91877	-2.8824	-2.84731	-2.81341	-2.78062	-2.74887	-2.74887	-2.74887	-2.74887	-2.74887	-2.74887	-2.74887	-2.74887	-2.7181	-2.7181	-2.7181	-2.7181	-2.7181	-2.7181	-2.74887	-2.74887	-2.74887	-2.74887	-2.74887	-2.74887	-2.74887	-2.78062	-2.78062	-2.78062	-2.78062	-2.81341	-2.81341	-2.81341	-2.81341	-2.81341	-2.81341	-2.81341	-2.81341	-2.78062	-2.78062	-2.78062
-3.03655	-2.99573	-2.99573	-2.95651	-2.95651	-2.91877	-2.91877	-2.91877	-2.91877	-2.8824	-2.8824	-2.84731	-2.81341	-2.78062	-2.74887	-2.74887	-2.74887	-2.74887	-2.74887	-2.74887	-2.74887	-2.74887	-2.7181	-2.7181	-2.7181	-2.7181	-2.7181	-2.7181	-2.74887	-2.74887	-2.74887	-2.74887	-2.74887	-2.74887	-2.74887	-2.78062	-2.78062	-2.78062	-2.78062	-2.81341	-2.81341	-2.81341	-2.81341	-2.81341	-2.81341	-2.81341	-2.81341	-2.81341	-2.78062	-2.78062
-3.03655	-2.99573	-2.99573	-2.95651	-2.95651	-2.91877	-2.8824	-2.8824	-2.8824	-2.8824	-2.84731	-2.84731	-2.81341	-2.78062	-2.74887	-2.74887	-2.7181	-2.7181	-2.7181	-2.74887	-2.74887	-2.7181	-2.7181	-2.7181	-2.7181	-2.7181	-2.7181	-2.7181	-2.74887	-2.74887	-2.74887	-2.74887	-2.74887	-2.74887	-2.74887	-2.78062	-2.78062	-2.78062	-2.78062	-2.81341	-2.81341	-2.81341	-2.81341	-2.81341	-2.81341	-2.81341	-2.81341	-2.81341	-2.78062	-2.78062
-3.03655	-2.99573	-2.99573	-2.95651	-2.91877	-2.91877	-2.8824	-2.8824	-2.8824	-2.8824	-2.84731	-2.81341	-2.78062	-2.74887	-2.74887	-2.7181	-2.7181	-2.7181	-2.7181	-2.7181	-2.7181	-2.7181	-2.7181	-2.7181	-2.7181	-2.7181	-2.7181	-2.7181	-2.74887	-2.74887	-2.74887	-2.74887	-2.74887	-2.74887	-2.74887	-2.78062	-2.78062	-2.78062	-2.78062	-2.81341	-2.81341	-2.81341	-2.81341	-2.81341	-2.81341	-2.81341	-2.81341	-2.81341	-2.81341	-2.78062
-3.03655	-2.99573	-2.99573	-2.95651	-2.91877	-2.8824	-2.8824	-2.84731	-2.84731	-2.84731	-2.84731	-2.81341	-2.78062	-2.74887	-2.74887	-2.7181	-2.7181	-2.7181	-2.7181	-2.7181	-2.7181	-2.7181	-2.7181	-2.7181	-2.68825	-2.68825	-2.7181	-2.7181	-2.74887	-2.74887	-2.74887	-2.74887	-2.74887	-2.74887	-2.74887	-2.78062	-2.78062	-2.78062	-2.81341	-2.81341	-2.81341	-2.81341	-2.81341	-2.81341	-2.81341	-2.84731	-2.84731	-2.81341	-2.81341	-2.81341
-3.03655	-2.99573	-2.99573	-2.95651	-2.91877	-2.8824	-2.84731	-2.84731	-2.84731	-2.84731	-2.84731	-2.81341	-2.78062	-2.74887	-2.7181	-2.7181	-2.7181	-2.7181	-2.7181	-2.7181	-2.7181	-2.7181	-2.7181	-2.7181	-2.68825	-2.7181	-2.7181	-2.7181	-2.74887	-2.74887	-2.74887	-2.74887	-2.74887	-2.74887	-2.78062	-2.78062	-2.78062	-2.78062	-2.81341	-2.81341	-2.81341	-2.81341	-2.84731	-2.84731	-2.84731	-2.84731	-2.84731	-2.84731	-2.81341	-2.81341
-3.03655	-2.99573	-2.99573	-2.95651	-2.91877	-2.8824	-2.84731	-2.84731	-2.84731	-2.84731	-2.81341	-2.81341	-2.78062	-2.74887	-2.7181	-2.7181	-2.7181	-2.7181	-2.7181	-2.7181	-2.7181	-2.7181	-2.7181	-2.7181	-2.7181	-2.7181	-2.7181	-2.7181	-2.74887	-2.74887	-2.74887	-2.74887	-2.74887	-2.78062	-2.78062	-2.78062	-2.78062	-2.81341	-2.81341	-2.81341	-2.84731	-2.84731	-2.84731	-2.84731	-2.84731	-2.84731	-2.84731	-2.84731	-2.84731	-2.84731
-3.03655	-3.03655	-2.99573	-2.95651	-2.91877	-2.8824	-2.84731	-2.84731	-2.84731	-2.84731	-2.81341	-2.81341	-2.78062	-2.74887	-2.7181	-2.7181	-2.7181	-2.7181	-2.7181	-2.7181	-2.7181	-2.7181	-2.7181	-2.7181	-2.7181	-2.7181	-2.7181	-2.74887	-2.74887	-2.74887	-2.74887	-2.78062	-2.78062	-2.78062	-2.78062	-2.81341	-2.81341	-2.81341	-2.81341	-2.84731	-2.84731	-2.84731	-2.84731	-2.84731	-2.8824	-2.8824	-2.8824	-2.84731	-2.84731	-2.84731
-3.03655	-3.03655	-2.99573	-2.95651	-2.91877	-2.8824	-2.84731	-2.84731	-2.84731	-2.84731	-2.81341	-2.78062	-2.78062	-2.74887	-2.7181	-2.7181	-2.7181	-2.7181	-2.7181	-2.7181	-2.7181	-2.7181	-2.7181	-2.7181	-2.7181	-2.7181	-2.7181	-2.74887	-2.74887	-2.74887	-2.78062	-2.78062	-2.78062	-2.78062	-2.81341	-2.81341	-2.81341	-2.84731	-2.84731	-2.84731	-2.84731	-2.84731	-2.8824	-2.8824	-2.8824	-2.8824	-2.8824	-2.8824	-2.8824	-2.8824
-3.07911	-3.03655	-2.99573	-2.95651	-2.91877	-2.8824	-2.84731	-2.84731	-2.84731	-2.84731	-2.81341	-2.78062	-2.78062	-2.74887	-2.7181	-2.7181	-2.7181	-2.7181	-2.7181	-2.7181	-2.7181	-2.7181	-2.7181	-2.7181	-2.7181	-2.7181	-2.74887	-2.74887	-2.74887	-2.78062	-2.78062	-2.78062	-2.78062	-2.81341	-2.81341	-2.81341	-2.84731	-2.84731	-2.84731	-2.84731	-2.8824	-2.8824	-2.8824	-2.8824	-2.8824	-2.8824	-2.8824	-2.8824	-2.8824	-2.8824
-3.07911	-3.07911	-3.03655	-2.95651	-2.91877	-2.8824	-2.8824	-2.84731	-2.84731	-2.84731	-2.81341	-2.78062	-2.78062	-2.74887	-2.7181	-2.7181	-2.7181	-2.7181	-2.7181	-2.7181	-2.7181	-2.7181	-2.7181	-2.7181	-2.7181	-2.7181	-2.74887	-2.74887	-2.78062	-2.78062	-2.78062	-2.78062	-2.78062	-2.81341	-2.81341	-2.81341	-2.84731	-2.84731	-2.84731	-2.8824	-2.8824	-2.8824	-2.8824	-2.8824	-2.91877	-2.91877	-2.91877	-2.91877	-2.91877	-2.91877
-3.12357	-3.07911	-3.03655	-2.99573	-2.91877	-2.8824	-2.8824	-2.84731	-2.84731	-2.84731	-2.81341	-2.78062	-2.74887	-2.74887	-2.7181	-2.7181	-2.68825	-2.7181	-2.7181	-2.7181	-2.7181	-2.7181	-2.7181	-2.7181	-2.7181	-2.7181	-2.74887	-2.74887	-2.78062	-2.78062	-2.78062	-2.78062	-2.78062	-2.81341	-2.81341	-2.84731	-2.84731	-2.84731	-2.8824	-2.8824	-2.8824	-2.8824	-2.8824	-2.8824	-2.91877	-2.91877	-2.91877	-2.91877	-2.91877	-2.91877
-3.12357	-3.07911	-3.03655	-2.99573	-2.91877	-2.8824	-2.8824	-2.84731	-2.84731	-2.84731	-2.81341	-2.78062	-2.74887	-2.7181	-2.7181	-2.68825	-2.68825	-2.7181	-2.7181	-2.7181	-2.7181	-2.7181	-2.7181	-2.7181	-2.7181	-2.7181	-2.74887	-2.74887	-2.78062	-2.78062	-2.78062	-2.78062	-2.78062	-2.81341	-2.81341	-2.81341	-2.84731	-2.84731	-2.8824	-2.8824	-2.8824	-2.8824	-2.8824	-2.91877	-2.91877	-2.91877	-2.91877	-2.91877	-2.91877	-2.91877
-3.12357	-3.07911	-3.03655	-2.99573	-2.91877	-2.8824	-2.84731	-2.84731	-2.84731	-2.81341	-2.81341	-2.78062	-2.74887	-2.7181	-2.7181	-2.68825	-2.68825	-2.68825	-2.7181	-2.7181	-2.7181	-2.7181	-2.7181	-2.7181	-2.7181	-2.7181	-2.74887	-2.74887	-2.74887	-2.78062	-2.78062	-2.78062	-2.78062	-2.78062	-2.81341	-2.81341	-2.84731	-2.84731	-2.84731	-2.8824	-2.8824	-2.8824	-2.8824	-2.91877	-2.91877	-2.91877	-2.91877	-2.91877	-2.91877	-2.91877
-3.12357	-3.07911	-3.03655	-2.95651	-2.91877	-2.8824	-2.84731	-2.84731	-2.81341	-2.81341	-2.81341	-2.78062	-2.74887	-2.7181	-2.7181	-2.68825	-2.68825	-2.68825	-2.7181	-2.7181	-2.7181	-2.7181	-2.7181	-2.7181	-2.7181	-2.7181	-2.7181	-2.74887	-2.74887	-2.78062	-2.78062	-2.78062	-2.78062	-2.78062	-2.81341	-2.81341	-2.84731	-2.84731	-2.84731	-2.8824	-2.8824	-2.8824	-2.8824	-2.91877	-2.91877	-2.91877	-2.91877	-2.91877	-2.91877	-2.91877
-3.12357	-3.07911	-2.99573	-2.95651	-2.8824	-2.84731	-2.84731	-2.81341	-2.81341	-2.81341	-2.78062	-2.78062	-2.74887	-2.7181	-2.68825	-2.68825	-2.68825	-2.68825	-2.68825	-2.7181	-2.7181	-2.7181	-2.7181	-2.7181	-2.7181	-2.7181	-2.7181	-2.74887	-2.74887	-2.74887	-2.74887	-2.78062	-2.78062	-2.78062	-2.78062	-2.81341	-2.81341	-2.84731	-2.84731	-2.8824	-2.8824	-2.8824	-2.8824	-2.91877	-2.91877	-2.91877	-2.95651	-2.95651	-2.95651	-2.91877
-3.07911	-3.03655	-2.99573	-2.91877	-2.8824	-2.84731	-2.81341	-2.81341	-2.78062	-2.78062	-2.78062	-2.74887	-2.7181	-2.7181	-2.68825	-2.68825	-2.68825	-2.68825	-2.68825	-2.68825	-2.7181	-2.7181	-2.7181	-2.68825	-2.7181	-2.7181	-2.7181	-2.74887	-2.74887	-2.74887	-2.74887	-2.74887	-2.78062	-2.78062	-2.78062	-2.81341	-2.81341	-2.84731	-2.84731	-2.84731	-2.8824	-2.8824	-2.8824	-2.91877	-2.91877	-2.91877	-2.95651	-2.95651	-2.95651	-2.91877
-3.07911	-3.03655	-2.99573	-2.91877	-2.84731	-2.81341	-2.81341	-2.78062	-2.78062	-2.78062	-2.74887	-2.74887	-2.7181	-2.68825	-2.68825	-2.65926	-2.65926	-2.68825	-2.68825	-2.68825	-2.68825	-2.68825	-2.68825	-2.68825	-2.68825	-2.7181	-2.7181	-2.7181	-2.74887	-2.74887	-2.74887	-2.74887	-2.74887	-2.78062	-2.78062	-2.81341	-2.81341	-2.84731	-2.84731	-2.84731	-2.8824	-2.8824	-2.8824	-2.91877	-2.91877	-2.91877	-2.95651	-2.95651	-2.95651	-2.91877
-3.07911	-3.03655	-2.95651	-2.91877	-2.84731	-2.81341	-2.78062	-2.78062	-2.78062	-2.74887	-2.74887	-2.7181	-2.7181	-2.68825	-2.65926	-2.65926	-2.65926	-2.65926	-2.65926	-2.68825	-2.68825	-2.68825	-2.68825	-2.68825	-2.68825	-2.68825	-2.7181	-2.7181	-2.74887	-2.74887	-2.74887	-2.74887	-2.74887	-2.78062	-2.78062	-2.78062	-2.81341	-2.81341	-2.84731	-2.84731	-2.8824	-2.8824	-2.8824	-2.8824	-2.91877	-2.91877	-2.91877	-2.95651	-2.91877	-2.91877
-3.07911	-3.03655	-2.95651	-2.91877	-2.84731	-2.81341	-2.78062	-2.78062	-2.74887	-2.74887	-2.74887	-2.7181	-2.68825	-2.68825	-2.65926	-2.65926	-2.65926	-2.65926	-2.65926	-2.68825	-2.68825	-2.68825	-2.68825	-2.68825	-2.68825	-2.68825	-2.7181	-2.7181	-2.7181	-2.74887	-2.74887	-2.74887	-2.74887	-2.78062	-2.78062	-2.78062	-2.81341	-2.81341	-2.84731	-2.84731	-2.8824	-2.8824	-2.8824	-2.8824	-2.91877	-2.91877	-2.91877	-2.91877	-2.91877	-2.91877
-3.07911	-3.03655	-2.95651	-2.91877	-2.84731	-2.81341	-2.78062	-2.78062	-2.74887	-2.74887	-2.74887	-2.7181	-2.68825	-2.68825	-2.65926	-2.65926	-2.65926	-2.65926	-2.65926	-2.68825	-2.68825	-2.68825	-2.68825	-2.68825	-2.68825	-2.68825	-2.7181	-2.7181	-2.74887	-2.74887	-2.74887	-2.74887	-2.74887	-2.78062	-2.78062	-2.81341	-2.81341	-2.84731	-2.84731	-2.84731	-2.84731	-2.8824	-2.8824	-2.8824	-2.91877	-2.91877	-2.91877	-2.91877	-2.91877	-2.91877
-3.07911	-3.03655	-2.99573	-2.91877	-2.84731	-2.81341	-2.78062	-2.78062	-2.78062	-2.78062	-2.74887	-2.74887	-2.7181	-2.68825	-2.65926	-2.65926	-2.65926	-2.65926	-2.68825	-2.68825	-2.68825	-2.68825	-2.68825	-2.68825	-2.7181	-2.7181	-2.7181	-2.7181	-2.74887	-2.74887	-2.74887	-2.74887	-2.78062	-2.78062	-2.78062	-2.81341	-2.81341	-2.84731	-2.84731	-2.84731	-2.8824	-2.8824	-2.8824	-2.8824	-2.91877	-2.91877	-2.91877	-2.91877	-2.91877	-2.91877
-3.12357	-3.07911	-2.99573	-2.91877	-2.8824	-2.84731	-2.81341	-2.78062	-2.78062	-2.78062	-2.78062	-2.74887	-2.7181	-2.68825	-2.68825	-2.65926	-2.65926	-2.68825	-2.68825	-2.68825	-2.7181	-2.7181	-2.7181	-2.7181	-2.7181	-2.7181	-2.74887	-2.74887	-2.74887	-2.74887	-2.78062	-2.78062	-2.78062	-2.78062	-2.81341	-2.81341	-2.84731	-2.84731	-2.84731	-2.8824	-2.8824	-2.8824	-2.8824	-2.91877	-2.91877	-2.91877	-2.91877	-2.91877	-2.91877	-2.91877
-3.12357	-3.07911	-2.99573	-2.95651	-2.8824	-2.84731	-2.81341	-2.81341	-2.78062	-2.78062	-2.78062	-2.74887	-2.7181	-2.7181	-2.68825	-2.68825	-2.68825	-2.68825	-2.68825	-2.7181	-2.7181	-2.7181	-2.7181	-2.7181	-2.7181	-2.74887	-2.74887	-2.74887	-2.78062	-2.78062	-2.78062	-2.78062	-2.78062	-2.81341	-2.81341	-2.84731	-2.84731	-2.84731	-2.84731	-2.8824	-2.8824	-2.8824	-2.8824	-2.91877	-2.91877	-2.91877	-2.91877	-2.91877	-2.91877	-2.91877
-3.12357	-3.07911	-2.99573	-2.95651	-2.8824	-2.84731	-2.81341	-2.81341	-2.78062	-2.78062	-2.78062	-2.74887	-2.74887	-2.7181	-2.68825	-2.68825	-2.68825	-2.68825	-2.7181	-2.7181	-2.7181	-2.74887	-2.74887	-2.74887	-2.74887	-2.74887	-2.74887	-2.78062	-2.78062	-2.78062	-2.78062	-2.81341	-2.81341	-2.81341	-2.81341	-2.84731	-2.84731	-2.84731	-2.8824	-2.8824	-2.8824	-2.8824	-2.91877	-2.91877	-2.91877	-2.91877	-2.95651	-2.95651	-2.91877	-2.91877
-3.12357	-3.07911	-2.99573	-2.91877	-2.8824	-2.84731	-2.81341	-2.81341	-2.78062	-2.78062	-2.78062	-2.74887	-2.74887	-2.7181	-2.68825	-2.68825	-2.68825	-2.7181	-2.7181	-2.7181	-2.74887	-2.74887	-2.74887	-2.74887	-2.74887	-2.74887	-2.74887	-2.78062	-2.78062	-2.78062	-2.78062	-2.81341	-2.81341	-2.81341	-2.81341	-2.84731	-2.84731	-2.84731	-2.8824	-2.8824	-2.8824	-2.8824	-2.91877	-2.91877	-2.91877	-2.91877	-2.95651	-2.95651	-2.91877	-2.91877
-3.12357	-3.03655	-2.99573	-2.91877	-2.8824	-2.84731	-2.81341	-2.78062	-2.78062	-2.78062	-2.78062	-2.74887	-2.74887	-2.7181	-2.68825	-2.68825	-2.68825	-2.7181	-2.7181	-2.7181	-2.74887	-2.74887	-2.74887	-2.74887	-2.74887	-2.74887	-2.74887	-2.78062	-2.78062	-2.78062	-2.78062	-2.78062	-2.81341	-2.81341	-2.81341	-2.84731	-2.84731	-2.84731	-2.8824	-2.8824	-2.8824	-2.8824	-2.91877	-2.91877	-2.91877	-2.91877	-2.91877	-2.91877	-2.91877	-2.91877
-3.07911	-3.03655	-2.99573	-2.91877	-2.8824	-2.81341	-2.81341	-2.78062	-2.78062	-2.78062	-2.78062	-2.74887	-2.74887	-2.7181	-2.68825	-2.68825	-2.68825	-2.7181	-2.7181	-2.7181	-2.7181	-2.74887	-2.74887	-2.74887	-2.74887	-2.74887	-2.74887	-2.74887	-2.78062	-2.78062	-2.78062	-2.78062	-2.78062	-2.81341	-2.81341	-2.81341	-2.84731	-2.84731	-2.84731	-2.8824	-2.8824	-2.8824	-2.8824	-2.91877	-2.91877	-2.91877	-2.91877	-2.91877	-2.91877	-2.91877
-3.07911	-3.03655	-2.99573	-2.91877	-2.84731	-2.81341	-2.78062	-2.78062	-2.78062	-2.78062	-2.74887	-2.74887	-2.74887	-2.7181	-2.7181	-2.68825	-2.68825	-2.7181	-2.7181	-2.7181	-2.7181	-2.74887	-2.74887	-2.74887	-2.74887	-2.74887	-2.74887	-2.74887	-2.74887	-2.74887	-2.78062	-2.78062	-2.78062	-2.78062	-2.81341	-2.81341	-2.81341	-2.84731	-2.84731	-2.84731	-2.8824	-2.8824	-2.8824	-2.91877	-2.91877	-2.91877	-2.91877	-2.91877	-2.91877	-2.91877
-3.07911	-3.03655	-2.95651	-2.91877	-2.84731	-2.81341	-2.78062	-2.78062	-2.78062	-2.78062	-2.74887	-2.74887	-2.74887	-2.7181	-2.7181	-2.7181	-2.7181	-2.7181	-2.7181	-2.7181	-2.7181	-2.7181	-2.74887	-2.74887	-2.74887	-2.74887	-2.74887	-2.74887	-2.74887	-2.74887	-2.78062	-2.78062	-2.78062	-2.78062	-2.81341	-2.81341	-2.81341	-2.84731	-2.84731	-2.84731	-2.84731	-2.8824	-2.8824	-2.8824	-2.91877	-2.91877	-2.91877	-2.91877	-2.91877	-2.91877
-3.07911	-3.03655	-2.95651	-2.91877	-2.84731	-2.81341	-2.78062	-2.78062	-2.78062	-2.78062	-2.74887	-2.74887	-2.74887	-2.7181	-2.7181	-2.7181	-2.7181	-2.7181	-2.7181	-2.7181	-2.7181	-2.74887	-2.74887	-2.74887	-2.74887	-2.74887	-2.74887	-2.74887	-2.74887	-2.74887	-2.78062	-2.78062	-2.78062	-2.78062	-2.81341	-2.81341	-2.81341	-2.81341	-2.84731	-2.84731	-2.84731	-2.8824	-2.8824	-2.8824	-2.8824	-2.91877	-2.91877	-2.91877	-2.91877	-2.8824
-3.07911	-3.03655	-2.95651	-2.8824	-2.84731	-2.81341	-2.78062	-2.78062	-2.78062	-2.74887	-2.74887	-2.74887	-2.74887	-2.7181	-2.7181	-2.7181	-2.7181	-2.7181	-2.7181	-2.7181	-2.74887	-2.74887	-2.74887	-2.74887	-2.74887	-2.74887	-2.74887	-2.74887	-2.74887	-2.78062	-2.78062	-2.78062	-2.78062	-2.78062	-2.81341	-2.81341	-2.81341	-2.81341	-2.84731	-2.84731	-2.84731	-2.84731	-2.8824	-2.8824	-2.8824	-2.8824	-2.8824	-2.8824	-2.8824	-2.8824
-3.07911	-3.03655	-2.95651	-2.8824	-2.84731	-2.81341	-2.78062	-2.78062	-2.78062	-2.74887	-2.74887	-2.74887	-2.74887	-2.7181	-2.7181	-2.7181	-2.7181	-2.7181	-2.74887	-2.74887	-2.74887	-2.74887	-2.74887	-2.74887	-2.74887	-2.74887	-2.74887	-2.74887	-2.78062	-2.78062	-2.78062	-2.78062	-2.81341	-2.81341	-2.81341	-2.81341	-2.81341	-2.84731	-2.84731	-2.84731	-2.84731	-2.84731	-2.8824	-2.8824	-2.8824	-2.8824	-2.8824	-2.8824	-2.8824	-2.8824
-3.07911	-3.03655	-2.95651	-2.91877	-2.84731	-2.81341	-2.78062	-2.78062	-2.78062	-2.78062	-2.78062	-2.74887	-2.74887	-2.74887	-2.74887	-2.74887	-2.74887	-2.74887	-2.74887	-2.74887	-2.74887	-2.74887	-2.74887	-2.74887	-2.74887	-2.78062	-2.78062	-2.78062	-2.78062	-2.78062	-2.78062	-2.81341	-2.81341	-2.81341	-2.81341	-2.81341	-2.81341	-2.84731	-2.84731	-2.84731	-2.84731	-2.84731	-2.8824	-2.8824	-2.8824	-2.8824	-2.8824	-2.8824	-2.8824	-2.8824
-3.07911	-3.03655	-2.95651	-2.91877	-2.84731	-2.81341	-2.78062	-2.78062	-2.78062	-2.78062	-2.78062	-2.78062	-2.74887	-2.74887	-2.74887	-2.74887	-2.74887	-2.74887	-2.74887	-2.78062	-2.78062	-2.78062	-2.78062	-2.78062	-2.78062	-2.78062	-2.78062	-2.78062	-2.78062	-2.81341	-2.81341	-2.81341	-2.81341	-2.81341	-2.81341	-2.81341	-2.84731	-2.84731	-2.84731	-2.84731	-2.84731	-2.84731	-2.8824	-2.8824	-2.8824	-2.8824	-2.8824	-2.8824	-2.8824	-2.8824
-3.07911	-3.03655	-2.99573	-2.91877	-2.84731	-2.81341	-2.78062	-2.78062	-2.78062	-2.78062	-2.78062	-2.78062	-2.78062	-2.74887	-2.74887	-2.74887	-2.74887	-2.74887	-2.78062	-2.78062	-2.78062	-2.78062	-2.78062	-2.78062	-2.78062	-2.78062	-2.78062	-2.78062	-2.78062	-2.81341	-2.81341	-2.81341	-2.81341	-2.81341	-2.81341	-2.81341	-2.81341	-2.84731	-2.84731	-2.84731	-2.84731	-2.84731	-2.84731	-2.8824	-2.8824	-2.8824	-2.8824	-2.8824	-2.8824	-2.8824
-3.07911	-3.03655	-2.99573	-2.91877	-2.8824	-2.81341	-2.81341	-2.78062	-2.78062	-2.78062	-2.78062	-2.78062	-2.78062	-2.78062	-2.78062	-2.74887	-2.78062	-2.78062	-2.78062	-2.78062	-2.78062	-2.78062	-2.78062	-2.78062	-2.78062	-2.78062	-2.78062	-2.78062	-2.81341	-2.81341	-2.81341	-2.81341	-2.81341	-2.81341	-2.81341	-2.81341	-2.81341	-2.81341	-2.84731	-2.84731	-2.84731	-2.84731	-2.84731	-2.84731	-2.8824	-2.8824	-2.8824	-2.8824	-2.8824	-2.8824
-3.12357	-3.03655	-2.99573	-2.91877	-2.8824	-2.84731	-2.81341	-2.78062	-2.78062	-2.78062	-2.78062	-2.78062	-2.78062	-2.78062	-2.78062	-2.78062	-2.78062	-2.78062	-2.78062	-2.78062	-2.78062	-2.78062	-2.78062	-2.78062	-2.78062	-2.78062	-2.78062	-2.78062	-2.81341	-2.81341	-2.81341	-2.81341	-2.81341	-2.81341	-2.81341	-2.81341	-2.81341	-2.81341	-2.81341	-2.81341	-2.84731	-2.84731	-2.84731	-2.84731	-2.8824	-2.8824	-2.8824	-2.8824	-2.8824	-2.8824
-3.07911	-3.03655	-2.99573	-2.91877	-2.8824	-2.84731	-2.81341	-2.78062	-2.78062	-2.78062	-2.78062	-2.78062	-2.78062	-2.78062	-2.78062	-2.78062	-2.78062	-2.78062	-2.78062	-2.78062	-2.78062	-2.78062	-2.78062	-2.78062	-2.78062	-2.78062	-2.78062	-2.78062	-2.78062	-2.81341	-2.81341	-2.81341	-2.81341	-2.81341	-2.81341	-2.81341	-2.81341	-2.81341	-2.81341	-2.81341	-2.84731	-2.84731	-2.84731	-2.84731	-2.8824	-2.8824	-2.8824	-2.8824	-2.8824	-2.8824
-3.07911	-3.03655	-2.99573	-2.91877	-2.8824	-2.84731	-2.81341	-2.81341	-2.78062	-2.78062	-2.78062	-2.78062	-2.78062	-2.78062	-2.78062	-2.78062	-2.78062	-2.78062	-2.78062	-2.78062	-2.78062	-2.78062	-2.78062	-2.78062	-2.78062	-2.78062	-2.78062	-2.78062	-2.78062	-2.78062	-2.81341	-2.81341	-2.81341	-2.81341	-2.81341	-2.81341	-2.81341	-2.81341	-2.81341	-2.81341	-2.84731	-2.84731	-2.84731	-2.84731	-2.8824	-2.8824	-2.8824	-2.8824	-2.8824	-2.8824
-3.07911	-3.03655	-2.99573	-2.91877	-2.8824	-2.84731	-2.81341	-2.81341	-2.81341	-2.78062	-2.78062	-2.78062	-2.78062	-2.78062	-2.78062	-2.78062	-2.78062	-2.78062	-2.78062	-2.78062	-2.78062	-2.78062	-2.78062	-2.78062	-2.78062	-2.78062	-2.78062	-2.78062	-2.78062	-2.78062	-2.81341	-2.81341	-2.81341	-2.81341	-2.81341	-2.81341	-2.81341	-2.81341	-2.81341	-2.81341	-2.81341	-2.84731	-2.84731	-2.84731	-2.84731	-2.8824	-2.8824	-2.8824	-2.8824	-2.8824
-3.07911	-3.03655	-2.99573	-2.91877	-2.8824	-2.84731	-2.81341	-2.81341	-2.81341	-2.78062	-2.78062	-2.78062	-2.78062	-2.78062	-2.78062	-2.74887	-2.74887	-2.78062	-2.78062	-2.78062	-2.78062	-2.78062	-2.78062	-2.78062	-2.78062	-2.78062	-2.78062	-2.78062	-2.78062	-2.78062	-2.78062	-2.81341	-2.81341	-2.81341	-2.78062	-2.81341	-2.81341	-2.81341	-2.81341	-2.81341	-2.81341	-2.84731	-2.84731	-2.84731	-2.84731	-2.8824	-2.8824	-2.8824	-2.8824	-2.8824
-3.07911	-3.03655	-2.99573	-2.91877	-2.8824	-2.84731	-2.81341	-2.81341	-2.81341	-2.81341	-2.78062	-2.78062	-2.78062	-2.78062	-2.78062	-2.74887	-2.74887	-2.74887	-2.78062	-2.78062	-2.78062	-2.78062	-2.78062	-2.78062	-2.78062	-2.78062	-2.78062	-2.78062	-2.78062	-2.78062	-2.78062	-2.78062	-2.78062	-2.78062	-2.78062	-2.78062	-2.81341	-2.81341	-2.81341	-2.81341	-2.81341	-2.84731	-2.84731	-2.84731	-2.84731	-2.84731	-2.8824	-2.8824	-2.8824	-2.8824
-3.03655	-3.03655	-2.99573	-2.91877	-2.8824	-2.84731	-2.84731	-2.81341	-2.81341	-2.81341	-2.78062	-2.78062	-2.78062	-2.78062	-2.74887	-2.74887	-2.74887	-2.74887	-2.78062	-2.78062	-2.78062	-2.78062	-2.78062	-2.78062	-2.78062	-2.78062	-2.78062	-2.78062	-2.78062	-2.78062	-2.78062	-2.78062	-2.78062	-2.78062	-2.78062	-2.78062	-2.78062	-2.81341	-2.81341	-2.81341	-2.81341	-2.81341	-2.84731	-2.84731	-2.84731	-2.84731	-2.84731	-2.84731	-2.8824	-2.84731
-3.03655	-3.03655	-2.99573	-2.95651	-2.8824	-2.8824	-2.84731	-2.81341	-2.81341	-2.81341	-2.81341	-2.78062	-2.78062	-2.78062	-2.78062	-2.74887	-2.74887	-2.74887	-2.78062	-2.78062	-2.78062	-2.78062	-2.78062	-2.78062	-2.78062	-2.78062	-2.78062	-2.78062	-2.78062	-2.78062	-2.78062	-2.78062	-2.78062	-2.78062	-2.78062	-2.78062	-2.78062	-2.81341	-2.81341	-2.81341	-2.81341	-2.81341	-2.81341	-2.84731	-2.84731	-2.84731	-2.84731	-2.84731	-2.84731	-2.84731
-3.03655	-3.03655	-2.99573	-2.95651	-2.91877	-2.8824	-2.84731	-2.84731	-2.81341	-2.81341	-2.81341	-2.81341	-2.78062	-2.78062	-2.78062	-2.78062	-2.78062	-2.78062	-2.78062	-2.78062	-2.78062	-2.78062	-2.78062	-2.78062	-2.78062	-2.78062	-2.78062	-2.78062	-2.78062	-2.78062	-2.78062	-2.78062	-2.78062	-2.78062	-2.78062	-2.78062	-2.78062	-2.81341	-2.81341	-2.81341	-2.81341	-2.81341	-2.81341	-2.84731	-2.84731	-2.84731	-2.84731	-2.84731	-2.84731	-2.84731
-3.07911	-3.03655	-2.99573	-2.95651	-2.91877	-2.8824	-2.84731	-2.84731	-2.84731	-2.81341	-2.81341	-2.81341	-2.81341	-2.78062	-2.78062	-2.78062	-2.78062	-2.78062	-2.78062	-2.78062	-2.78062	-2.78062	-2.78062	-2.78062	-2.78062	-2.78062	-2.78062	-2.78062	-2.78062	-2.78062	-2.78062	-2.78062	-2.78062	-2.78062	-2.78062	-2.78062	-2.78062	-2.78062	-2.81341	-2.81341	-2.81341	-2.81341	-2.81341	-2.81341	-2.84731	-2.84731	-2.84731	-2.84731	-2.84731	-2.84731
-3.07911	-3.03655	-2.99573	-2.95651	-2.91877	-2.8824	-2.8824	-2.84731	-2.84731	-2.84731	-2.84731	-2.81341	-2.81341	-2.81341	-2.81341	-2.78062	-2.78062	-2.78062	-2.81341	-2.81341	-2.81341	-2.81341	-2.81341	-2.81341	-2.81341	-2.78062	-2.78062	-2.78062	-2.78062	-2.78062	-2.78062	-2.78062	-2.78062	-2.78062	-2.78062	-2.78062	-2.78062	-2.78062	-2.81341	-2.81341	-2.81341	-2.81341	-2.81341	-2.81341	-2.81341	-2.84731	-2.84731	-2.84731	-2.84731	-2.84731
-3.07911	-3.03655	-2.99573	-2.95651	-2.91877	-2.91877	-2.8824	-2.8824	-2.84731	-2.84731	-2.84731	-2.84731	-2.84731	-2.81341	-2.81341	-2.81341	-2.81341	-2.81341	-2.81341	-2.81341	-2.81341	-2.81341	-2.81341	-2.81341	-2.81341	-2.81341	-2.78062	-2.78062	-2.78062	-2.81341	-2.81341	-2.81341	-2.78062	-2.78062	-2.78062	-2.78062	-2.78062	-2.78062	-2.81341	-2.81341	-2.81341	-2.81341	-2.81341	-2.81341	-2.81341	-2.84731	-2.84731	-2.84731	-2.84731	-2.81341
-3.07911	-3.07911	-3.03655	-2.99573	-2.95651	-2.91877	-2.8824	-2.8824	-2.84731	-2.84731	-2.84731	-2.84731	-2.84731	-2.84731	-2.81341	-2.81341	-2.81341	-2.81341	-2.81341	-2.81341	-2.81341	-2.81341	-2.81341	-2.81341	-2.81341	-2.81341	-2.81341	-2.81341	-2.81341	-2.81341	-2.81341	-2.81341	-2.81341	-2.78062	-2.78062	-2.78062	-2.78062	-2.78062	-2.81341	-2.81341	-2.81341	-2.81341	-2.81341	-2.81341	-2.81341	-2.81341	-2.84731	-2.84731	-2.81341	-2.81341
-3.07911	-3.07911	-3.03655	-2.99573	-2.95651	-2.91877	-2.8824	-2.8824	-2.8824	-2.8824	-2.84731	-2.84731	-2.84731	-2.84731	-2.84731	-2.84731	-2.84731	-2.84731	-2.84731	-2.84731	-2.84731	-2.84731	-2.84731	-2.81341	-2.81341	-2.81341	-2.81341	-2.81341	-2.81341	-2.81341	-2.81341	-2.81341	-2.81341	-2.81341	-2.78062	-2.78062	-2.78062	-2.78062	-2.81341	-2.81341	-2.81341	-2.81341	-2.81341	-2.81341	-2.81341	-2.81341	-2.84731	-2.84731	-2.81341	-2.81341
-3.12357	-3.07911	-3.03655	-2.99573	-2.95651	-2.91877	-2.91877	-2.8824	-2.8824	-2.8824	-2.8824	-2.8824	-2.8824	-2.84731	-2.84731	-2.84731	-2.84731	-2.84731	-2.84731	-2.84731	-2.84731	-2.84731	-2.84731	-2.84731	-2.84731	-2.81341	-2.81341	-2.81341	-2.81341	-2.81341	-2.81341	-2.81341	-2.81341	-2.81341	-2.81341	-2.81341	-2.81341	-2.81341	-2.81341	-2.81341	-2.81341	-2.81341	-2.81341	-2.81341	-2.81341	-2.84731	-2.84731	-2.84731	-2.81341	-2.81341
-3.12357	-3.07911	-3.03655	-2.99573	-2.95651	-2.91877	-2.91877	-2.8824	-2.8824	-2.8824	-2.8824	-2.8824	-2.8824	-2.8824	-2.84731	-2.84731	-2.84731	-2.84731	-2.84731	-2.84731	-2.84731	-2.84731	-2.84731	-2.84731	-2.84731	-2.84731	-2.84731	-2.84731	-2.84731	-2.84731	-2.84731	-2.84731	-2.81341	-2.81341	-2.81341	-2.81341	-2.81341	-2.81341	-2.81341	-2.81341	-2.81341	-2.81341	-2.81341	-2.81341	-2.84731	-2.84731	-2.84731	-2.84731	-2.84731	-2.81341
-3.12357	-3.12357	-3.07911	-3.03655	-2.99573	-2.95651	-2.91877	-2.91877	-2.91877	-2.91877	-2.8824	-2.8824	-2.8824	-2.8824	-2.8824	-2.8824	-2.8824	-2.8824	-2.8824	-2.8824	-2.8824	-2.8824	-2.8824	-2.84731	-2.84731	-2.84731	-2.84731	-2.84731	-2.84731	-2.84731	-2.84731	-2.84731	-2.84731	-2.84731	-2.81341	-2.81341	-2.81341	-2.81341	-2.81341	-2.81341	-2.81341	-2.81341	-2.81341	-2.84731	-2.84731	-2.84731	-2.84731	-2.84731	-2.84731	-2.81341
-3.17009	-3.12357	-3.07911	-3.03655	-2.99573	-2.95651	-2.95651	-2.91877	-2.91877	-2.91877	-2.91877	-2.91877	-2.91877	-2.8824	-2.8824	-2.8824	-2.8824	-2.8824	-2.8824	-2.8824	-2.8824	-2.8824	-2.8824	-2.8824	-2.8824	-2.84731	-2.84731	-2.84731	-2.84731	-2.84731	-2.84731	-2.84731	-2.84731	-2.84731	-2.84731	-2.84731	-2.84731	-2.84731	-2.84731	-2.84731	-2.84731	-2.81341	-2.81341	-2.84731	-2.84731	-2.84731	-2.84731	-2.84731	-2.84731	-2.84731
-3.17009	-3.12357	-3.12357	-3.07911	-3.03655	-2.99573	-2.95651	-2.95651	-2.91877	-2.91877	-2.91877	-2.91877	-2.91877	-2.91877	-2.91877	-2.8824	-2.8824	-2.8824	-2.8824	-2.8824	-2.8824	-2.8824	-2.8824	-2.8824	-2.8824	-2.8824	-2.8824	-2.84731	-2.8824	-2.8824	-2.8824	-2.8824	-2.84731	-2.84731	-2.84731	-2.84731	-2.84731	-2.84731	-2.84731	-2.84731	-2.81341	-2.81341	-2.81341	-2.81341	-2.84731	-2.84731	-2.84731	-2.84731	-2.84731	-2.81341
-3.21888	-3.17009	-3.12357	-3.07911	-3.03655	-2.99573	-2.99573	-2.95651	-2.95651	-2.95651	-2.95651	-2.91877	-2.91877	-2.91877	-2.91877	-2.91877	-2.91877	-2.91877	-2.91877	-2.91877	-2.91877	-2.91877	-2.8824	-2.8824	-2.8824	-2.8824	-2.8824	-2.8824	-2.8824	-2.8824	-2.8824	-2.8824	-2.8824	-2.84731	-2.84731	-2.84731	-2.84731	-2.84731	-2.84731	-2.81341	-2.81341	-2.81341	-2.81341	-2.81341	-2.81341	-2.84731	-2.84731	-2.84731	-2.84731	-2.81341
-3.21888	-3.17009	-3.17009	-3.12357	-3.07911	-3.03655	-2.99573	-2.95651	-2.95651	-2.95651	-2.95651	-2.95651	-2.95651	-2.91877	-2.91877	-2.91877	-2.91877	-2.91877	-2.91877	-2.91877	-2.91877	-2.91877	-2.91877	-2.91877	-2.8824	-2.8824	-2.8824	-2.8824	-2.8824	-2.8824	-2.8824	-2.8824	-2.8824	-2.84731	-2.84731	-2.84731	-2.84731	-2.84731	-2.84731	-2.81341	-2.81341	-2.81341	-2.81341	-2.81341	-2.81341	-2.81341	-2.84731	-2.84731	-2.84731	-2.81341
-3.22318	-3.21888	-3.17009	-3.12357	-3.07911	-3.03655	-2.99573	-2.99573	-2.99573	-2.95651	-2.95651	-2.95651	-2.95651	-2.95651	-2.95651	-2.91877	-2.91877	-2.91877	-2.91877	-2.91877	-2.91877	-2.91877	-2.91877	-2.91877	-2.91877	-2.8824	-2.8824	-2.8824	-2.8824	-2.8824	-2.8824	-2.8824	-2.8824	-2.84731	-2.84731	-2.84731	-2.84731	-2.84731	-2.81341	-2.81341	-2.81341	-2.81341	-2.81341	-2.81341	-2.81341	-2.81341	-2.84731	-2.84731	-2.84731	-2.81341
-3.24378	-3.21888	-3.17009	-3.12357	-3.07911	-3.03655	-3.03655	-2.99573	-2.99573	-2.99573	-2.99573	-2.95651	-2.95651	-2.95651	-2.95651	-2.95651	-2.95651	-2.95651	-2.95651	-2.95651	-2.95651	-2.91877	-2.91877	-2.91877	-2.91877	-2.8824	-2.8824	-2.8824	-2.8824	-2.8824	-2.8824	-2.8824	-2.8824	-2.84731	-2.84731	-2.84731	-2.81341	-2.81341	-2.81341	-2.81341	-2.81341	-2.81341	-2.81341	-2.81341	-2.81341	-2.81341	-2.81341	-2.81341	-2.81341	-2.81341
-3.25821	-3.22669	-3.21888	-3.17009	-3.12357	-3.07911	-3.03655	-2.99573	-2.99573	-2.99573	-2.99573	-2.99573	-2.95651	-2.95651	-2.95651	-2.95651	-2.95651	-2.95651	-2.95651	-2.95651	-2.95651	-2.91877	-2.91877	-2.91877	-2.91877	-2.8824	-2.8824	-2.8824	-2.8824	-2.8824	-2.8824	-2.8824	-2.84731	-2.84731	-2.84731	-2.81341	-2.81341	-2.81341	-2.81341	-2.81341	-2.81341	-2.81341	-2.81341	-2.81341	-2.81341	-2.81341	-2.81341	-2.81341	-2.81341	-2.81341
-3.26571	-3.23403	-3.21888	-3.17009	-3.12357	-3.07911	-3.03655	-2.99573	-2.99573	-2.99573	-2.99573	-2.99573	-2.95651	-2.95651	-2.95651	-2.95651	-2.95651	-2.95651	-2.95651	-2.95651	-2.91877	-2.91877	-2.91877	-2.91877	-2.8824	-2.8824	-2.8824	-2.8824	-2.8824	-2.8824	-2.84731	-2.84731	-2.84731	-2.84731	-2.81341	-2.81341	-2.81341	-2.81341	-2.81341	-2.81341	-2.81341	-2.81341	-2.81341	-2.81341	-2.81341	-2.81341	-2.81341	-2.81341	-2.81341	-2.81341
-3.26778	-3.23626	-3.21888	-3.17009	-3.12357	-3.07911	-3.03655	-2.99573	-2.99573	-2.99573	-2.99573	-2.99573	-2.95651	-2.95651	-2.95651	-2.95651	-2.95651	-2.95651	-2.91877	-2.91877	-2.91877	-2.91877	-2.91877	-2.8824	-2.8824	-2.8824	-2.8824	-2.84731	-2.84731	-2.84731	-2.84731	-2.84731	-2.84731	-2.81341	-2.81341	-2.81341	-2.81341	-2.78062	-2.78062	-2.78062	-2.78062	-2.78062	-2.78062	-2.78062	-2.81341	-2.81341	-2.81341	-2.81341	-2.81341	-2.81341
-3.26714	-3.23624	-3.21888	-3.17009	-3.12357	-3.07911	-3.03655	-2.99573	-2.99573	-2.99573	-2.99573	-2.99573	-2.95651	-2.95651	-2.95651	-2.95651	-2.91877	-2.91877	-2.91877	-2.91877	-2.91877	-2.91877	-2.91877	-2.8824	-2.8824	-2.8824	-2.84731	-2.84731	-2.84731	-2.84731	-2.84731	-2.84731	-2.81341	-2.81341	-2.81341	-2.78062	-2.78062	-2.78062	-2.78062	-2.78062	-2.78062	-2.78062	-2.78062	-2.78062	-2.78062	-2.78062	-2.81341	-2.81341	-2.81341	-2.78062
-3.26372	-3.23436	-3.21888	-3.17009	-3.12357	-3.07911	-3.03655	-2.99573	-2.99573	-2.99573	-2.99573	-2.95651	-2.95651	-2.95651	-2.95651	-2.91877	-2.91877	-2.91877	-2.91877	-2.91877	-2.91877	-2.91877	-2.8824	-2.8824	-2.8824	-2.84731	-2.84731	-2.84731	-2.84731	-2.84731	-2.84731	-2.81341	-2.81341	-2.81341	-2.78062	-2.78062	-2.78062	-2.78062	-2.78062	-2.78062	-2.78062	-2.78062	-2.78062	-2.78062	-2.78062	-2.78062	-2.78062	-2.78062	-2.78062	-2.78062
-3.25767	-3.23085	-3.21888	-3.17009	-3.12357	-3.07911	-3.03655	-2.99573	-2.99573	-2.99573	-2.99573	-2.95651	-2.95651	-2.95651	-2.91877	-2.91877	-2.91877	-2.91877	-2.91877	-2.91877	-2.91877	-2.8824	-2.8824	-2.8824	-2.84731	-2.84731	-2.84731	-2.84731	-2.84731	-2.84731	-2.81341	-2.81341	-2.81341	-2.81341	-2.78062	-2.78062	-2.78062	-2.78062	-2.78062	-2.78062	-2.78062	-2.78062	-2.78062	-2.78062	-2.78062	-2.78062	-2.78062	-2.78062	-2.78062	-2.78062
-3.248	-3.2247	-3.21888	-3.17009	-3.12357	-3.07911	-3.03655	-3.03655	-2.99573	-2.99573	-2.99573	-2.95651	-2.95651	-2.95651	-2.91877	-2.91877	-2.91877	-2.91877	-2.91877	-2.91877	-2.91877	-2.8824	-2.8824	-2.8824	-2.84731	-2.84731	-2.84731	-2.84731	-2.84731	-2.84731	-2.81341	-2.81341	-2.81341	-2.81341	-2.78062	-2.78062	-2.78062	-2.78062	-2.78062	-2.78062	-2.78062	-2.78062	-2.78062	-2.78062	-2.78062	-2.78062	-2.78062	-2.78062	-2.78062	-2.78062
-3.23489	-3.21888	-3.21888	-3.17009	-3.12357	-3.07911	-3.03655	-3.03655	-2.99573	-2.99573	-2.99573	-2.99573	-2.95651	-2.95651	-2.91877	-2.91877	-2.91877	-2.91877	-2.91877	-2.91877	-2.91877	-2.91877	-2.8824	-2.8824	-2.84731	-2.84731	-2.84731	-2.84731	-2.84731	-2.84731	-2.81341	-2.81341	-2.81341	-2.81341	-2.78062	-2.78062	-2.78062	-2.78062	-2.78062	-2.78062	-2.78062	-2.78062	-2.78062	-2.78062	-2.78062	-2.78062	-2.78062	-2.81341	-2.81341	-2.78062
-3.21888	-3.21888	-3.21888	-3.17009	-3.12357	-3.07911	-3.03655	-3.03655	-2.99573	-2.99573	-2.99573	-2.99573	-2.95651	-2.95651	-2.91877	-2.91877	-2.91877	-2.91877	-2.91877	-2.91877	-2.91877	-2.91877	-2.8824	-2.8824	-2.8824	-2.84731	-2.84731	-2.84731	-2.84731	-2.84731	-2.84731	-2.81341	-2.81341	-2.81341	-2.78062	-2.78062	-2.78062	-2.78062	-2.78062	-2.78062	-2.78062	-2.78062	-2.78062	-2.78062	-2.78062	-2.78062	-2.81341	-2.81341	-2.81341	-2.78062
-3.21888	-3.21888	-3.17009	-3.17009	-3.12357	-3.07911	-3.03655	-3.03655	-2.99573	-2.99573	-2.99573	-2.99573	-2.95651	-2.95651	-2.91877	-2.91877	-2.91877	-2.91877	-2.91877	-2.91877	-2.91877	-2.91877	-2.8824	-2.8824	-2.8824	-2.84731	-2.84731	-2.84731	-2.84731	-2.84731	-2.84731	-2.81341	-2.81341	-2.81341	-2.78062	-2.78062	-2.78062	-2.78062	-2.78062	-2.78062	-2.78062	-2.78062	-2.78062	-2.78062	-2.78062	-2.78062	-2.81341	-2.81341	-2.81341	-2.81341
-3.21888	-3.21888	-3.17009	-3.17009	-3.12357	-3.07911	-3.03655	-3.03655	-3.03655	-2.99573	-2.99573	-2.99573	-2.95651	-2.95651	-2.91877	-2.91877	-2.91877	-2.91877	-2.91877	-2.91877	-2.91877	-2.91877	-2.8824	-2.8824	-2.8824	-2.84731	-2.84731	-2.84731	-2.84731	-2.84731	-2.81341	-2.81341	-2.81341	-2.78062	-2.78062	-2.78062	-2.78062	-2.78062	-2.78062	-2.78062	-2.78062	-2.78062	-2.78062	-2.78062	-2.78062	-2.78062	-2.81341	-2.81341	-2.81341	-2.81341
-3.21888	-3.17009	-3.17009	-3.17009	-3.12357	-3.07911	-3.03655	-3.03655	-3.03655	-2.99573	-2.99573	-2.99573	-2.95651	-2.95651	-2.91877	-2.91877	-2.91877	-2.91877	-2.91877	-2.91877	-2.91877	-2.91877	-2.8824	-2.8824	-2.84731	-2.84731	-2.84731	-2.84731	-2.84731	-2.84731	-2.81341	-2.81341	-2.81341	-2.78062	-2.78062	-2.78062	-2.78062	-2.74887	-2.78062	-2.78062	-2.78062	-2.78062	-2.78062	-2.78062	-2.78062	-2.78062	-2.81341	-2.81341	-2.81341	-2.81341
-3.17009	-3.17009	-3.17009	-3.12357	-3.12357	-3.07911	-3.03655	-3.03655	-2.99573	-2.99573	-2.99573	-2.95651	-2.95651	-2.91877	-2.91877	-2.91877	-2.91877	-2.91877	-2.91877	-2.91877	-2.91877	-2.8824	-2.8824	-2.8824	-2.84731	-2.84731	-2.84731	-2.84731	-2.81341	-2.81341	-2.81341	-2.81341	-2.78062	-2.78062	-2.78062	-2.74887	-2.74887	-2.74887	-2.74887	-2.74887	-2.78062	-2.78062	-2.78062	-2.78062	-2.78062	-2.78062	-2.78062	-2.81341	-2.81341	-2.78062
-3.17009	-3.17009	-3.17009	-3.12357	-3.12357	-3.07911	-3.03655	-3.03655	-3.03655	-2.99573	-2.99573	-2.95651	-2.95651	-2.91877	-2.91877	-2.91877	-2.8824	-2.8824	-2.91877	-2.91877	-2.91877	-2.8824	-2.8824	-2.8824	-2.84731	-2.84731	-2.84731	-2.81341	-2.81341	-2.81341	-2.81341	-2.78062	-2.78062	-2.78062	-2.74887	-2.74887	-2.74887	-2.74887	-2.74887	-2.74887	-2.78062	-2.78062	-2.78062	-2.78062	-2.78062	-2.78062	-2.78062	-2.81341	-2.81341	-2.81341
-3.17009	-3.17009	-3.17009	-3.12357	-3.12357	-3.07911	-3.03655	-3.03655	-3.03655	-2.99573	-2.99573	-2.95651	-2.95651	-2.91877	-2.91877	-2.8824	-2.8824	-2.8824	-2.8824	-2.8824	-2.8824	-2.8824	-2.8824	-2.84731	-2.84731	-2.84731	-2.81341	-2.81341	-2.81341	-2.81341	-2.81341	-2.78062	-2.78062	-2.78062	-2.74887	-2.74887	-2.74887	-2.74887	-2.74887	-2.74887	-2.78062	-2.78062	-2.78062	-2.78062	-2.78062	-2.78062	-2.81341	-2.81341	-2.81341	-2.81341
-3.17009	-3.17009	-3.17009	-3.17009	-3.12357	-3.07911	-3.03655	-3.03655	-3.03655	-2.99573	-2.99573	-2.99573	-2.95651	-2.91877	-2.91877	-2.8824	-2.8824	-2.8824	-2.8824	-2.8824	-2.8824	-2.8824	-2.8824	-2.84731	-2.84731	-2.84731	-2.81341	-2.81341	-2.81341	-2.81341	-2.78062	-2.78062	-2.78062	-2.78062	-2.74887	-2.74887	-2.74887	-2.74887	-2.74887	-2.74887	-2.78062	-2.78062	-2.78062	-2.78062	-2.78062	-2.78062	-2.81341	-2.81341	-2.81341	-2.81341
-3.17009	-3.17009	-3.17009	-3.17009	-3.12357	-3.07911	-3.07911	-3.03655	-3.03655	-2.99573	-2.99573	-2.99573	-2.95651	-2.91877	-2.91877	-2.8824	-2.8824	-2.8824	-2.8824	-2.8824	-2.8824	-2.8824	-2.8824	-2.84731	-2.84731	-2.84731	-2.81341	-2.81341	-2.81341	-2.81341	-2.78062	-2.78062	-2.78062	-2.74887	-2.74887	-2.74887	-2.74887	-2.74887	-2.74887	-2.74887	-2.78062	-2.78062	-2.78062	-2.78062	-2.78062	-2.78062	-2.81341	-2.81341	-2.81341	-2.81341
-3.17009	-3.17009	-3.17009	-3.17009	-3.12357	-3.07911	-3.07911	-3.03655	-3.03655	-3.03655	-2.99573	-2.99573	-2.95651	-2.91877	-2.91877	-2.8824	-2.8824	-2.8824	-2.8824	-2.8824	-2.8824	-2.8824	-2.8824	-2.84731	-2.84731	-2.81341	-2.81341	-2.81341	-2.81341	-2.78062	-2.78062	-2.78062	-2.78062	-2.74887	-2.74887	-2.74887	-2.74887	-2.74887	-2.74887	-2.74887	-2.78062	-2.78062	-2.78062	-2.78062	-2.78062	-2.78062	-2.81341	-2.81341	-2.81341	-2.81341
-3.17009	-3.17009	-3.17009	-3.17009	-3.12357	-3.07911	-3.07911	-3.03655	-3.03655	-3.03655	-2.99573	-2.99573	-2.95651	-2.91877	-2.91877	-2.8824	-2.8824	-2.8824	-2.8824	-2.8824	-2.8824	-2.8824	-2.8824	-2.84731	-2.84731	-2.81341	-2.81341	-2.81341	-2.81341	-2.78062	-2.78062	-2.78062	-2.74887	-2.74887	-2.74887	-2.74887	-2.74887	-2.74887	-2.74887	-2.74887	-2.74887	-2.78062	-2.78062	-2.78062	-2.78062	-2.78062	-2.78062	-2.81341	-2.81341	-2.81341
-3.17009	-3.17009	-3.17009	-3.17009	-3.12357	-3.12357	-3.07911	-3.07911	-3.03655	-3.03655	-2.99573	-2.99573	-2.95651	-2.91877	-2.91877	-2.8824	-2.8824	-2.8824	-2.8824	-2.8824	-2.8824	-2.8824	-2.84731	-2.84731	-2.84731	-2.81341	-2.81341	-2.81341	-2.81341	-2.78062	-2.78062	-2.78062	-2.74887	-2.74887	-2.74887	-2.74887	-2.74887	-2.74887	-2.74887	-2.74887	-2.74887	-2.74887	-2.78062	-2.78062	-2.78062	-2.78062	-2.78062	-2.78062	-2.78062	-2.78062
-3.17009	-3.17009	-3.17009	-3.17009	-3.12357	-3.12357	-3.07911	-3.07911	-3.03655	-3.03655	-2.99573	-2.99573	-2.95651	-2.95651	-2.91877	-2.8824	-2.8824	-2.8824	-2.8824	-2.8824	-2.8824	-2.8824	-2.84731	-2.84731	-2.84731	-2.81341	-2.81341	-2.81341	-2.78062	-2.78062	-2.78062	-2.78062	-2.74887	-2.74887	-2.74887	-2.7181	-2.74887	-2.74887	-2.74887	-2.74887	-2.74887	-2.74887	-2.74887	-2.78062	-2.78062	-2.78062	-2.78062	-2.78062	-2.78062	-2.78062
-3.17009	-3.17009	-3.17009	-3.17009	-3.12357	-3.12357	-3.07911	-3.07911	-3.03655	-3.03655	-2.99573	-2.99573	-2.95651	-2.95651	-2.91877	-2.91877	-2.8824	-2.8824	-2.8824	-2.8824	-2.8824	-2.8824	-2.84731	-2.84731	-2.84731	-2.81341	-2.81341	-2.81341	-2.81341	-2.78062	-2.78062	-2.78062	-2.74887	-2.74887	-2.74887	-2.7181	-2.7181	-2.74887	-2.74887	-2.74887	-2.74887	-2.74887	-2.74887	-2.74887	-2.78062	-2.78062	-2.78062	-2.78062	-2.78062	-2.78062
-3.17009	-3.17009	-3.17009	-3.17009	-3.12357	-3.12357	-3.07911	-3.07911	-3.03655	-3.03655	-3.03655	-2.99573	-2.95651	-2.95651	-2.91877	-2.91877	-2.8824	-2.8824	-2.8824	-2.8824	-2.8824	-2.8824	-2.8824	-2.84731	-2.84731	-2.84731	-2.81341	-2.81341	-2.81341	-2.78062	-2.78062	-2.78062	-2.74887	-2.74887	-2.7181	-2.7181	-2.7181	-2.7181	-2.74887	-2.74887	-2.74887	-2.74887	-2.74887	-2.74887	-2.74887	-2.78062	-2.78062	-2.78062	-2.78062	-2.78062
-3.17009	-3.17009	-3.17009	-3.17009	-3.12357	-3.12357	-3.07911	-3.07911	-3.07911	-3.03655	-3.03655	-2.99573	-2.95651	-2.95651	-2.91877	-2.91877	-2.8824	-2.8824	-2.8824	-2.8824	-2.8824	-2.8824	-2.8824	-2.84731	-2.84731	-2.84731	-2.81341	-2.81341	-2.81341	-2.78062	-2.78062	-2.78062	-2.74887	-2.74887	-2.7181	-2.7181	-2.7181	-2.7181	-2.74887	-2.74887	-2.74887	-2.74887	-2.74887	-2.74887	-2.74887	-2.74887	-2.78062	-2.78062	-2.78062	-2.74887
-3.17009	-3.17009	-3.17009	-3.17009	-3.17009	-3.12357	-3.07911	-3.07911	-3.07911	-3.03655	-3.03655	-2.99573	-2.95651	-2.95651	-2.91877	-2.91877	-2.8824	-2.8824	-2.8824	-2.8824	-2.8824	-2.8824	-2.8824	-2.84731	-2.84731	-2.84731	-2.84731	-2.81341	-2.81341	-2.81341	-2.78062	-2.78062	-2.74887	-2.74887	-2.74887	-2.7181	-2.7181	-2.7181	-2.74887	-2.74887	-2.74887	-2.74887	-2.74887	-2.74887	-2.74887	-2.74887	-2.78062	-2.78062	-2.78062	-2.74887
-3.17009	-3.17009	-3.17009	-3.17009	-3.17009	-3.12357	-3.12357	-3.07911	-3.07911	-3.03655	-3.03655	-2.99573	-2.95651	-2.95651	-2.91877	-2.8824	-2.8824	-2.8824	-2.8824	-2.8824	-2.8824	-2.8824	-2.8824	-2.84731	-2.84731	-2.84731	-2.84731	-2.81341	-2.81341	-2.81341	-2.78062	-2.78062	-2.74887	-2.74887	-2.74887	-2.7181	-2.7181	-2.7181	-2.7181	-2.74887	-2.74887	-2.74887	-2.74887	-2.74887	-2.74887	-2.74887	-2.74887	-2.74887	-2.74887	-2.74887
-3.17009	-3.17009	-3.17009	-3.17009	-3.17009	-3.12357	-3.12357	-3.07911	-3.07911	-3.03655	-3.03655	-2.99573	-2.95651	-2.95651	-2.91877	-2.8824	-2.8824	-2.8824	-2.8824	-2.8824	-2.8824	-2.8824	-2.8824	-2.84731	-2.84731	-2.84731	-2.84731	-2.81341	-2.81341	-2.81341	-2.78062	-2.78062	-2.74887	-2.74887	-2.7181	-2.7181	-2.7181	-2.7181	-2.7181	-2.7181	-2.7181	-2.74887	-2.74887	-2.74887	-2.74887	-2.74887	-2.74887	-2.74887	-2.74887	-2.74887
-3.17009	-3.17009	-3.17009	-3.17009	-3.17009	-3.12357	-3.12357	-3.07911	-3.07911	-3.03655	-3.03655	-2.99573	-2.95651	-2.91877	-2.91877	-2.8824	-2.8824	-2.8824	-2.8824	-2.8824	-2.8824	-2.8824	-2.84731	-2.84731	-2.84731	-2.84731	-2.81341	-2.81341	-2.81341	-2.78062	-2.78062	-2.78062	-2.74887	-2.74887	-2.7181	-2.7181	-2.7181	-2.7181	-2.7181	-2.7181	-2.7181	-2.7181	-2.7181	-2.74887	-2.74887	-2.74887	-2.74887	-2.74887	-2.74887	-2.74887
-3.17009	-3.17009	-3.17009	-3.17009	-3.17009	-3.12357	-3.12357	-3.07911	-3.07911	-3.03655	-3.03655	-2.99573	-2.95651	-2.91877	-2.91877	-2.8824	-2.8824	-2.8824	-2.8824	-2.8824	-2.84731	-2.84731	-2.84731	-2.84731	-2.84731	-2.81341	-2.81341	-2.81341	-2.81341	-2.78062	-2.78062	-2.74887	-2.74887	-2.74887	-2.7181	-2.7181	-2.7181	-2.7181	-2.7181	-2.7181	-2.7181	-2.7181	-2.7181	-2.7181	-2.7181	-2.7181	-2.7181	-2.7181	-2.7181	-2.7181
-3.17009	-3.17009	-3.17009	-3.17009	-3.17009	-3.12357	-3.12357	-3.07911	-3.07911	-3.03655	-3.03655	-2.99573	-2.95651	-2.91877	-2.91877	-2.8824	-2.8824	-2.84731	-2.84731	-2.84731	-2.84731	-2.84731	-2.84731	-2.84731	-2.81341	-2.81341	-2.81341	-2.81341	-2.78062	-2.78062	-2.74887	-2.74887	-2.74887	-2.7181	-2.7181	-2.7181	-2.68825	-2.68825	-2.68825	-2.68825	-2.68825	-2.68825	-2.7181	-2.7181	-2.7181	-2.7181	-2.7181	-2.7181	-2.7181	-2.7181
-3.17009	-3.17009	-3.17009	-3.17009	-3.17009	-3.17009	-3.12357	-3.07911	-3.07911	-3.03655	-3.03655	-2.99573	-2.95651	-2.91877	-2.8824	-2.8824	-2.84731	-2.84731	-2.84731	-2.84731	-2.84731	-2.84731	-2.81341	-2.81341	-2.81341	-2.81341	-2.78062	-2.78062	-2.78062	-2.74887	-2.74887	-2.74887	-2.7181	-2.7181	-2.68825	-2.68825	-2.68825	-2.68825	-2.68825	-2.68825	-2.68825	-2.68825	-2.68825	-2.68825	-2.68825	-2.68825	-2.68825	-2.68825	-2.68825	-2.68825
-3.17009	-3.17009	-3.17009	-3.17009	-3.17009	-3.17009	-3.12357	-3.12357	-3.07911	-3.03655	-3.03655	-2.99573	-2.95651	-2.91877	-2.8824	-2.8824	-2.84731	-2.84731	-2.84731	-2.84731	-2.84731	-2.81341	-2.81341	-2.81341	-2.78062	-2.78062	-2.78062	-2.78062	-2.74887	-2.74887	-2.74887	-2.7181	-2.7181	-2.68825	-2.68825	-2.68825	-2.65926	-2.65926	-2.65926	-2.65926	-2.65926	-2.65926	-2.68825	-2.68825	-2.68825	-2.68825	-2.68825	-2.68825	-2.68825	-2.68825
-3.17009	-3.17009	-3.17009	-3.17009	-3.17009	-3.17009	-3.12357	-3.12357	-3.07911	-3.07911	-3.03655	-2.99573	-2.95651	-2.91877	-2.8824	-2.84731	-2.84731	-2.84731	-2.84731	-2.84731	-2.81341	-2.81341	-2.81341	-2.78062	-2.78062	-2.78062	-2.78062	-2.74887	-2.74887	-2.74887	-2.7181	-2.7181	-2.68825	-2.68825	-2.65926	-2.65926	-2.65926	-2.65926	-2.65926	-2.65926	-2.65926	-2.65926	-2.65926	-2.65926	-2.65926	-2.65926	-2.65926	-2.65926	-2.65926	-2.65926
-3.12357	-3.17009	-3.17009	-3.17009	-3.17009	-3.17009	-3.12357	-3.12357	-3.07911	-3.07911	-3.03655	-2.99573	-2.95651	-2.91877	-2.8824	-2.84731	-2.84731	-2.84731	-2.81341	-2.81341	-2.81341	-2.81341	-2.78062	-2.78062	-2.78062	-2.74887	-2.74887	-2.74887	-2.74887	-2.7181	-2.7181	-2.68825	-2.68825	-2.65926	-2.65926	-2.65926	-2.63109	-2.63109	-2.63109	-2.63109	-2.63109	-2.65926	-2.65926	-2.65926	-2.65926	-2.65926	-2.65926	-2.65926	-2.65926	-2.65926
-3.12357	-3.17009	-3.17009	-3.17009	-3.17009	-3.17009	-3.12357	-3.12357	-3.07911	-3.07911	-3.03655	-2.99573	-2.95651	-2.91877	-2.8824	-2.84731	-2.84731	-2.81341	-2.81341	-2.81341	-2.81341	-2.81341	-2.78062	-2.78062	-2.78062	-2.74887	-2.74887	-2.74887	-2.7181	-2.7181	-2.68825	-2.68825	-2.65926	-2.65926	-2.63109	-2.63109	-2.63109	-2.63109	-2.63109	-2.63109	-2.63109	-2.63109	-2.63109	-2.63109	-2.65926	-2.65926	-2.65926	-2.65926	-2.65926	-2.65926
-3.12357	-3.17009	-3.17009	-3.21888	-3.17009	-3.17009	-3.17009	-3.12357	-3.12357	-3.07911	-3.03655	-2.99573	-2.95651	-2.91877	-2.8824	-2.84731	-2.84731	-2.81341	-2.81341	-2.81341	-2.81341	-2.78062	-2.78062	-2.78062	-2.74887	-2.74887	-2.74887	-2.74887	-2.7181	-2.7181	-2.68825	-2.68825	-2.65926	-2.65926	-2.63109	-2.63109	-2.63109	-2.63109	-2.63109	-2.63109	-2.63109	-2.63109	-2.63109	-2.63109	-2.63109	-2.63109	-2.63109	-2.63109	-2.63109	-2.63109
-3.17009	-3.17009	-3.21888	-3.21888	-3.21888	-3.17009	-3.17009	-3.12357	-3.12357	-3.07911	-3.03655	-2.99573	-2.95651	-2.91877	-2.8824	-2.84731	-2.84731	-2.81341	-2.81341	-2.81341	-2.81341	-2.78062	-2.78062	-2.78062	-2.74887	-2.74887	-2.74887	-2.74887	-2.7181	-2.7181	-2.68825	-2.65926	-2.65926	-2.63109	-2.63109	-2.63109	-2.63109	-2.63109	-2.63109	-2.63109	-2.63109	-2.63109	-2.63109	-2.63109	-2.63109	-2.63109	-2.63109	-2.63109	-2.63109	-2.63109
-3.17009	-3.17009	-3.21888	-3.21888	-3.21888	-3.17009	-3.17009	-3.12357	-3.12357	-3.07911	-3.03655	-2.99573	-2.95651	-2.91877	-2.8824	-2.84731	-2.84731	-2.81341	-2.81341	-2.81341	-2.81341	-2.78062	-2.78062	-2.78062	-2.74887	-2.74887	-2.74887	-2.7181	-2.7181	-2.7181	-2.68825	-2.65926	-2.65926	-2.63109	-2.63109	-2.63109	-2.63109	-2.60369	-2.60369	-2.60369	-2.60369	-2.60369	-2.63109	-2.63109	-2.63109	-2.63109	-2.63109	-2.63109	-2.63109	-2.63109
-3.17009	-3.17009	-3.21888	-3.21888	-3.21888	-3.17009	-3.17009	-3.12357	-3.12357	-3.07911	-3.03655	-2.99573	-2.95651	-2.91877	-2.8824	-2.84731	-2.81341	-2.81341	-2.81341	-2.81341	-2.81341	-2.78062	-2.78062	-2.74887	-2.74887	-2.74887	-2.74887	-2.7181	-2.7181	-2.68825	-2.68825	-2.65926	-2.65926	-2.63109	-2.63109	-2.63109	-2.63109	-2.60369	-2.60369	-2.60369	-2.60369	-2.60369	-2.60369	-2.60369	-2.60369	-2.60369	-2.60369	-2.60369	-2.60369	-2.60369
-3.17009	-3.17009	-3.21888	-3.21888	-3.21888	-3.17009	-3.17009	-3.12357	-3.12357	-3.07911	-3.03655	-2.99573	-2.95651	-2.91877	-2.8824	-2.84731	-2.81341	-2.81341	-2.81341	-2.81341	-2.78062	-2.78062	-2.78062	-2.74887	-2.74887	-2.74887	-2.74887	-2.7181	-2.7181	-2.7181	-2.68825	-2.65926	-2.65926	-2.63109	-2.63109	-2.63109	-2.63109	-2.63109	-2.60369	-2.60369	-2.60369	-2.60369	-2.60369	-2.60369	-2.60369	-2.60369	-2.60369	-2.60369	-2.60369	-2.60369
-3.17009	-3.17009	-3.21888	-3.21888	-3.21888	-3.17009	-3.17009	-3.12357	-3.12357	-3.07911	-3.03655	-2.99573	-2.95651	-2.91877	-2.84731	-2.84731	-2.81341	-2.81341	-2.81341	-2.81341	-2.78062	-2.78062	-2.78062	-2.74887	-2.74887	-2.74887	-2.74887	-2.74887	-2.7181	-2.7181	-2.68825	-2.68825	-2.65926	-2.65926	-2.63109	-2.63109	-2.63109	-2.63109	-2.63109	-2.60369	-2.60369	-2.60369	-2.60369	-2.60369	-2.60369	-2.60369	-2.60369	-2.60369	-2.60369	-2.60369
-3.17009	-3.21888	-3.21888	-3.21888	-3.17009	-3.17009	-3.17009	-3.12357	-3.07911	-3.07911	-3.03655	-2.99573	-2.95651	-2.8824	-2.84731	-2.84731	-2.81341	-2.81341	-2.81341	-2.81341	-2.78062	-2.78062	-2.78062	-2.78062	-2.74887	-2.74887	-2.74887	-2.74887	-2.7181	-2.7181	-2.68825	-2.68825	-2.65926	-2.65926	-2.63109	-2.63109	-2.63109	-2.63109	-2.63109	-2.60369	-2.60369	-2.60369	-2.60369	-2.60369	-2.60369	-2.60369	-2.60369	-2.60369	-2.60369	-2.60369
-3.17009	-3.21888	-3.21888	-3.21888	-3.21888	-3.17009	-3.17009	-3.12357	-3.12357	-3.07911	-3.03655	-2.99573	-2.95651	-2.91877	-2.8824	-2.84731	-2.81341	-2.81341	-2.81341	-2.81341	-2.81341	-2.78062	-2.78062	-2.78062	-2.78062	-2.74887	-2.74887	-2.74887	-2.74887	-2.7181	-2.7181	-2.68825	-2.68825	-2.65926	-2.63109	-2.63109	-2.63109	-2.63109	-2.63109	-2.60369	-2.60369	-2.60369	-2.60369	-2.60369	-2.60369	-2.60369	-2.60369	-2.60369	-2.60369	-2.60369
-3.17009	-3.21888	-3.21888	-3.21888	-3.21888	-3.17009	-3.17009	-3.12357	-3.12357	-3.07911	-3.03655	-2.99573	-2.95651	-2.91877	-2.8824	-2.84731	-2.81341	-2.81341	-2.81341	-2.81341	-2.81341	-2.81341	-2.78062	-2.78062	-2.78062	-2.78062	-2.74887	-2.74887	-2.74887	-2.74887	-2.7181	-2.68825	-2.68825	-2.65926	-2.65926	-2.63109	-2.63109	-2.63109	-2.63109	-2.60369	-2.60369	-2.60369	-2.60369	-2.60369	-2.60369	-2.60369	-2.60369	-2.60369	-2.60369	-2.60369
-3.21888	-3.21888	-3.21888	-3.21888	-3.21888	-3.21888	-3.17009	-3.17009	-3.12357	-3.07911	-3.03655	-2.99573	-2.95651	-2.91877	-2.8824	-2.84731	-2.84731	-2.84731	-2.81341	-2.81341	-2.81341	-2.81341	-2.81341	-2.78062	-2.78062	-2.78062	-2.78062	-2.78062	-2.74887	-2.74887	-2.7181	-2.7181	-2.68825	-2.68825	-2.65926	-2.65926	-2.63109	-2.63109	-2.63109	-2.63109	-2.60369	-2.60369	-2.60369	-2.60369	-2.60369	-2.60369	-2.60369	-2.60369	-2.60369	-2.60369
-3.21888	-3.21888	-3.21888	-3.21914	-3.21888	-3.21888	-3.17009	-3.17009	-3.12357	-3.12357	-3.07911	-3.03655	-2.99573	-2.91877	-2.8824	-2.8824	-2.84731	-2.84731	-2.84731	-2.84731	-2.81341	-2.81341	-2.81341	-2.81341	-2.78062	-2.78062	-2.78062	-2.78062	-2.78062	-2.74887	-2.74887	-2.7181	-2.7181	-2.68825	-2.65926	-2.65926	-2.63109	-2.63109	-2.63109	-2.63109	-2.63109	-2.60369	-2.60369	-2.60369	-2.60369	-2.60369	-2.60369	-2.60369	-2.60369	-2.60369
-3.21888	-3.2263	-3.23776	-3.23838	-3.22613	-3.21888	-3.21888	-3.17009	-3.17009	-3.12357	-3.07911	-3.03655	-2.99573	-2.95651	-2.91877	-2.8824	-2.8824	-2.84731	-2.84731	-2.84731	-2.84731	-2.84731	-2.81341	-2.81341	-2.81341	-2.81341	-2.78062	-2.78062	-2.78062	-2.78062	-2.74887	-2.74887	-2.7181	-2.68825	-2.68825	-2.65926	-2.65926	-2.65926	-2.63109	-2.63109	-2.63109	-2.63109	-2.60369	-2.60369	-2.60369	-2.60369	-2.60369	-2.60369	-2.60369	-2.60369
-3.23606	-3.25055	-3.26144	-3.26095	-3.24737	-3.22399	-3.21888	-3.21888	-3.17009	-3.12357	-3.12357	-3.07911	-3.03655	-2.95651	-2.91877	-2.91877	-2.8824	-2.8824	-2.8824	-2.84731	-2.84731	-2.84731	-2.84731	-2.81341	-2.81341	-2.81341	-2.81341	-2.81341	-2.81341	-2.78062	-2.78062	-2.74887	-2.74887	-2.7181	-2.68825	-2.68825	-2.65926	-2.65926	-2.65926	-2.63109	-2.63109	-2.63109	-2.63109	-2.60369	-2.60369	-2.60369	-2.60369	-2.60369	-2.60369	-2.60369
-3.26277	-3.27718	-3.28741	-3.28565	-3.27055	-3.24574	-3.21888	-3.21888	-3.17009	-3.17009	-3.12357	-3.07911	-3.03655	-2.99573	-2.95651	-2.91877	-2.8824	-2.8824	-2.8824	-2.8824	-2.8824	-2.8824	-2.84731	-2.84731	-2.84731	-2.81341	-2.81341	-2.81341	-2.81341	-2.81341	-2.78062	-2.78062	-2.74887	-2.7181	-2.7181	-2.68825	-2.68825	-2.65926	-2.65926	-2.65926	-2.63109	-2.63109	-2.63109	-2.63109	-2.60369	-2.60369	-2.60369	-2.60369	-2.60369	-2.60369
-3.28875	-3.30342	-3.31346	-3.31097	-3.29482	-3.26888	-3.23989	-3.21888	-3.21888	-3.17009	-3.12357	-3.12357	-3.03655	-2.99573	-2.95651	-2.95651	-2.91877	-2.91877	-2.8824	-2.8824	-2.8824	-2.8824	-2.8824	-2.84731	-2.84731	-2.84731	-2.84731	-2.84731	-2.84731	-2.81341	-2.81341	-2.78062	-2.78062	-2.74887	-2.7181	-2.7181	-2.68825	-2.68825	-2.68825	-2.65926	-2.65926	-2.63109	-2.63109	-2.63109	-2.60369	-2.60369	-2.60369	-2.60369	-2.60369	-2.60369
-3.31059	-3.3258	-3.33618	-3.33365	-3.31709	-3.29048	-3.26072	-3.23119	-3.21888	-3.21888	-3.17009	-3.12357	-3.07911	-3.03655	-2.99573	-2.95651	-2.91877	-2.91877	-2.91877	-2.91877	-2.91877	-2.8824	-2.8824	-2.8824	-2.8824	-2.84731	-2.84731	-2.84731	-2.84731	-2.84731	-2.81341	-2.81341	-2.78062	-2.74887	-2.74887	-2.7181	-2.7181	-2.68825	-2.68825	-2.65926	-2.65926	-2.63109	-2.63109	-2.63109	-2.60369	-2.60369	-2.60369	-2.60369	-2.60369	-2.60369
-3.32536	-3.34142	-3.35277	-3.35107	-3.33497	-3.30839	-3.27832	-3.24833	-3.21899	-3.21888	-3.17009	-3.12357	-3.07911	-3.03655	-2.99573	-2.95651	-2.95651	-2.91877	-2.91877	-2.91877	-2.91877	-2.91877	-2.91877	-2.8824	-2.8824	-2.8824	-2.8824	-2.84731	-2.84731	-2.84731	-2.84731	-2.81341	-2.78062	-2.78062	-2.74887	-2.7181	-2.7181	-2.7181	-2.68825	-2.68825	-2.65926	-2.65926	-2.63109	-2.63109	-2.60369	-2.60369	-2.60369	-2.60369	-2.60369	-2.60369
-3.33325	-3.35015	-3.36263	-3.36208	-3.34687	-3.32075	-3.2908	-3.26068	-3.23108	-3.21888	-3.17009	-3.17009	-3.12357	-3.03655	-2.99573	-2.99573	-2.95651	-2.95651	-2.95651	-2.91877	-2.91877	-2.91877	-2.91877	-2.8824	-2.8824	-2.8824	-2.8824	-2.8824	-2.84731	-2.84731	-2.84731	-2.81341	-2.78062	-2.78062	-2.74887	-2.74887	-2.7181	-2.7181	-2.68825	-2.68825	-2.65926	-2.65926	-2.63109	-2.63109	-2.60369	-2.60369	-2.60369	-2.60369	-2.60369	-2.57702
-3.33814	-3.35562	-3.36897	-3.36943	-3.35506	-3.32946	-3.29975	-3.26966	-3.23991	-3.21888	-3.21888	-3.17009	-3.12357	-3.07911	-3.03655	-2.99573	-2.95651	-2.95651	-2.95651	-2.95651	-2.95651	-2.91877	-2.91877	-2.91877	-2.8824	-2.8824	-2.8824	-2.8824	-2.8824	-2.84731	-2.84731	-2.81341	-2.81341	-2.78062	-2.74887	-2.74887	-2.7181	-2.7181	-2.68825	-2.68825	-2.65926	-2.65926	-2.63109	-2.63109	-2.60369	-2.60369	-2.60369	-2.57702	-2.57702	-2.57702
-3.34287	-3.36051	-3.37418	-3.37503	-3.36101	-3.33567	-3.30617	-3.27621	-3.24643	-3.21888	-3.21888	-3.17009	-3.12357	-3.07911	-3.03655	-2.99573	-2.99573	-2.95651	-2.95651	-2.95651	-2.95651	-2.95651	-2.91877	-2.91877	-2.8824	-2.8824	-2.8824	-2.8824	-2.8824	-2.84731	-2.84731	-2.81341	-2.81341	-2.78062	-2.74887	-2.74887	-2.7181	-2.7181	-2.68825	-2.68825	-2.65926	-2.65926	-2.63109	-2.60369	-2.60369	-2.60369	-2.57702	-2.57702	-2.57702	-2.57702
-3.35001	-3.3674	-3.38081	-3.38143	-3.36725	-3.34187	-3.31248	-3.28266	-3.25294	-3.22327	-3.21888	-3.17009	-3.12357	-3.07911	-3.03655	-2.99573	-2.99573	-2.99573	-2.95651	-2.95651	-2.95651	-2.95651	-2.91877	-2.91877	-2.91877	-2.8824	-2.8824	-2.8824	-2.8824	-2.84731	-2.84731	-2.81341	-2.81341	-2.78062	-2.74887	-2.74887	-2.7181	-2.7181	-2.68825	-2.68825	-2.65926	-2.63109	-2.63109	-2.60369	-2.60369	-2.57702	-2.57702	-2.57702	-2.57702	-2.57702
-3.35979	-3.37662	-3.38929	-3.38913	-3.37432	-3.34867	-3.31934	-3.28975	-3.26023	-3.23068	-3.21888	-3.17009	-3.12357	-3.07911	-3.03655	-3.03655	-2.99573	-2.99573	-2.99573	-2.99573	-2.95651	-2.95651	-2.95651	-2.91877	-2.91877	-2.8824	-2.8824	-2.8824	-2.8824	-2.8824	-2.84731	-2.84731	-2.81341	-2.78062	-2.74887	-2.74887	-2.7181	-2.7181	-2.68825	-2.68825	-2.65926	-2.63109	-2.63109	-2.60369	-2.60369	-2.57702	-2.57702	-2.57702	-2.55105	-2.55105
-3.37155	-3.38758	-3.39912	-3.39779	-3.38205	-3.35599	-3.32669	-3.29741	-3.26826	-3.23903	-3.21888	-3.17009	-3.12357	-3.07911	-3.07911	-3.03655	-2.99573	-2.99573	-2.99573	-2.99573	-2.99573	-2.95651	-2.95651	-2.91877	-2.91877	-2.91877	-2.8824	-2.8824	-2.8824	-2.8824	-2.84731	-2.84731	-2.81341	-2.78062	-2.74887	-2.74887	-2.7181	-2.7181	-2.68825	-2.68825	-2.65926	-2.63109	-2.63109	-2.60369	-2.60369	-2.57702	-2.57702	-2.57702	-2.55105	-2.55105
-3.38252	-3.39739	-3.40739	-3.40452	-3.38767	-3.36124	-3.33217	-3.30349	-3.27499	-3.2464	-3.21888	-3.21888	-3.17009	-3.12357	-3.07911	-3.03655	-3.03655	-2.99573	-2.99573	-2.99573	-2.99573	-2.99573	-2.95651	-2.95651	-2.91877	-2.91877	-2.91877	-2.8824	-2.8824	-2.8824	-2.84731	-2.84731	-2.81341	-2.78062	-2.78062	-2.74887	-2.7181	-2.7181	-2.68825	-2.68825	-2.65926	-2.63109	-2.63109	-2.60369	-2.57702	-2.57702	-2.57702	-2.55105	-2.55105	-2.55105
-3.39096	-3.40456	-3.41295	-3.40856	-3.39075	-3.36419	-3.33558	-3.30766	-3.27996	-3.25212	-3.21898	-3.21888	-3.17009	-3.12357	-3.07911	-3.03655	-3.03655	-3.03655	-2.99573	-2.99573	-2.99573	-2.99573	-2.95651	-2.95651	-2.91877	-2.91877	-2.91877	-2.8824	-2.8824	-2.8824	-2.84731	-2.84731	-2.81341	-2.78062	-2.78062	-2.74887	-2.7181	-2.7181	-2.68825	-2.68825	-2.65926	-2.63109	-2.63109	-2.60369	-2.57702	-2.57702	-2.57702	-2.55105	-2.55105	-2.55105
-3.39516	-3.4073	-3.414	-3.40823	-3.38974	-3.36344	-3.33564	-3.30877	-3.28203	-3.25505	-3.22266	-3.21888	-3.17009	-3.12357	-3.07911	-3.07911	-3.03655	-3.03655	-3.03655	-2.99573	-2.99573	-2.99573	-2.95651	-2.95651	-2.91877	-2.91877	-2.91877	-2.8824	-2.8824	-2.8824	-2.84731	-2.84731	-2.81341	-2.78062	-2.78062	-2.74887	-2.74887	-2.7181	-2.68825	-2.68825	-2.65926	-2.63109	-2.63109	-2.60369	-2.57702	-2.57702	-2.55105	-2.55105	-2.55105	-2.52573
-3.39389	-3.40473	-3.4102	-3.40377	-3.38546	-3.36012	-3.33362	-3.30804	-3.28232	-3.25615	-3.22443	-3.21888	-3.17009	-3.12357	-3.07911	-3.07911	-3.03655	-3.03655	-3.03655	-3.03655	-2.99573	-2.99573	-2.95651	-2.95651	-2.91877	-2.91877	-2.8824	-2.8824	-2.8824	-2.8824	-2.84731	-2.84731	-2.81341	-2.78062	-2.78062	-2.74887	-2.7181	-2.7181	-2.68825	-2.68825	-2.65926	-2.63109	-2.63109	-2.60369	-2.57702	-2.57702	-2.55105	-2.55105	-2.55105	-2.52573
-3.38947	-3.39894	-3.40324	-3.39639	-3.37859	-3.35451	-3.32949	-3.30532	-3.28069	-3.25536	-3.22435	-3.21888	-3.17009	-3.12357	-3.07911	-3.07911	-3.03655	-3.03655	-3.03655	-3.03655	-2.99573	-2.99573	-2.95651	-2.95651	-2.91877	-2.91877	-2.8824	-2.8824	-2.8824	-2.8824	-2.84731	-2.84731	-2.81341	-2.78062	-2.78062	-2.74887	-2.7181	-2.7181	-2.68825	-2.68825	-2.65926	-2.63109	-2.60369	-2.60369	-2.57702	-2.57702	-2.55105	-2.55105	-2.55105	-2.52573
-3.3848	-3.39298	-3.39622	-3.38909	-3.37191	-3.3491	-3.32545	-3.30256	-3.27894	-3.25444	-3.22423	-3.21888	-3.17009	-3.12357	-3.07911	-3.07911	-3.03655	-3.03655	-3.03655	-3.03655	-2.99573	-2.99573	-2.95651	-2.91877	-2.91877	-2.8824	-2.8824	-2.8824	-2.8824	-2.84731	-2.84731	-2.84731	-2.81341	-2.78062	-2.78062	-2.74887	-2.7181	-2.7181	-2.68825	-2.68825	-2.65926	-2.63109	-2.60369	-2.60369	-2.57702	-2.57702	-2.55105	-2.55105	-2.52573	-2.52573
-3.38135	-3.38809	-3.38999	-3.38216	-3.36514	-3.34315	-3.32053	-3.2987	-3.27603	-3.25242	-3.22321	-3.21888	-3.17009	-3.12357	-3.12357	-3.07911	-3.07911	-3.03655	-3.03655	-3.03655	-2.99573	-2.99573	-2.95651	-2.91877	-2.91877	-2.8824	-2.8824	-2.8824	-2.8824	-2.84731	-2.84731	-2.81341	-2.81341	-2.78062	-2.78062	-2.74887	-2.7181	-2.7181	-2.68825	-2.68825	-2.65926	-2.63109	-2.63109	-2.60369	-2.57702	-2.57702	-2.55105	-2.55105	-2.52573	-2.52573
-3.37932	-3.38452	-3.38483	-3.37587	-3.35848	-3.33683	-3.31486	-3.29387	-3.27207	-3.24938	-3.22131	-3.21888	-3.17009	-3.12357	-3.12357	-3.07911	-3.07911	-3.03655	-3.03655	-3.03655	-3.03655	-2.99573	-2.95651	-2.91877	-2.91877	-2.8824	-2.8824	-2.8824	-2.84731	-2.84731	-2.84731	-2.81341	-2.81341	-2.78062	-2.78062	-2.74887	-2.74887	-2.7181	-2.7181	-2.68825	-2.65926	-2.63109	-2.63109	-2.60369	-2.57702	-2.57702	-2.55105	-2.55105	-2.55105	-2.52573
-3.37682	-3.38043	-3.3789	-3.36837	-3.35007	-3.32825	-3.30659	-3.28624	-3.26526	-3.24346	-3.21888	-3.21888	-3.17009	-3.12357	-3.12357	-3.07911	-3.07911	-3.03655	-3.03655	-3.03655	-3.03655	-2.99573	-2.95651	-2.91877	-2.91877	-2.8824	-2.8824	-2.8824	-2.84731	-2.84731	-2.84731	-2.81341	-2.81341	-2.78062	-2.78062	-2.74887	-2.74887	-2.7181	-2.7181	-2.68825	-2.65926	-2.65926	-2.63109	-2.60369	-2.57702	-2.57702	-2.57702	-2.55105	-2.55105	-2.52573
-3.37101	-3.37323	-3.36991	-3.35763	-3.33806	-3.31567	-3.29403	-3.27415	-3.25397	-3.23313	-3.21888	-3.21888	-3.17009	-3.12357	-3.12357	-3.07911	-3.07911	-3.03655	-3.03655	-3.03655	-3.03655	-2.99573	-2.95651	-2.91877	-2.91877	-2.8824	-2.8824	-2.8824	-2.84731	-2.84731	-2.84731	-2.81341	-2.81341	-2.78062	-2.78062	-2.74887	-2.74887	-2.7181	-2.7181	-2.68825	-2.68825	-2.65926	-2.63109	-2.60369	-2.60369	-2.57702	-2.57702	-2.55105	-2.55105	-2.55105
-3.36057	-3.36173	-3.35692	-3.34305	-3.32219	-3.29913	-3.27743	-3.25799	-3.23869	-3.21889	-3.21888	-3.17009	-3.17009	-3.12357	-3.07911	-3.07911	-3.07911	-3.03655	-3.03655	-3.03655	-2.99573	-2.99573	-2.95651	-2.91877	-2.91877	-2.8824	-2.8824	-2.84731	-2.84731	-2.84731	-2.84731	-2.81341	-2.81341	-2.78062	-2.78062	-2.74887	-2.74887	-2.74887	-2.7181	-2.7181	-2.68825	-2.65926	-2.63109	-2.63109	-2.60369	-2.60369	-2.57702	-2.57702	-2.55105	-2.55105
-3.34791	-3.34827	-3.34219	-3.32681	-3.30456	-3.28063	-3.25864	-3.23949	-3.221	-3.21888	-3.21888	-3.17009	-3.12357	-3.12357	-3.07911	-3.07911	-3.03655	-3.03655	-3.03655	-3.03655	-2.99573	-2.99573	-2.95651	-2.91877	-2.8824	-2.8824	-2.8824	-2.84731	-2.84731	-2.84731	-2.84731	-2.81341	-2.81341	-2.78062	-2.78062	-2.74887	-2.74887	-2.74887	-2.7181	-2.7181	-2.68825	-2.65926	-2.65926	-2.63109	-2.60369	-2.60369	-2.57702	-2.57702	-2.57702	-2.55105
-3.33723	-3.33686	-3.32958	-3.31271	-3.28903	-3.26412	-3.2417	-3.22263	-3.21888	-3.21888	-3.17009	-3.17009	-3.12357	-3.12357	-3.07911	-3.07911	-3.03655	-3.03655	-3.03655	-2.99573	-2.99573	-2.95651	-2.95651	-2.91877	-2.8824	-2.8824	-2.84731	-2.84731	-2.84731	-2.84731	-2.81341	-2.81341	-2.81341	-2.78062	-2.78062	-2.74887	-2.74887	-2.74887	-2.74887	-2.7181	-2.68825	-2.68825	-2.65926	-2.63109	-2.60369	-2.60369	-2.57702	-2.57702	-2.57702	-2.55105
-3.33152	-3.33039	-3.32189	-3.30351	-3.2784	-3.25249	-3.22955	-3.21888	-3.21888	-3.21888	-3.17009	-3.17009	-3.12357	-3.07911	-3.07911	-3.03655	-3.03655	-3.03655	-3.03655	-2.99573	-2.99573	-2.95651	-2.91877	-2.91877	-2.8824	-2.8824	-2.84731	-2.84731	-2.84731	-2.84731	-2.81341	-2.81341	-2.81341	-2.78062	-2.78062	-2.78062	-2.74887	-2.74887	-2.74887	-2.7181	-2.68825	-2.68825	-2.65926	-2.63109	-2.60369	-2.60369	-2.57702	-2.57702	-2.57702	-2.55105
-3.33354	-3.33116	-3.32078	-3.30029	-3.27328	-3.24603	-3.2223	-3.21888	-3.21888	-3.17009	-3.17009	-3.12357	-3.12357	-3.07911	-3.07911	-3.03655	-3.03655	-3.03655	-2.99573	-2.99573	-2.99573	-2.95651	-2.91877	-2.91877	-2.8824	-2.84731	-2.84731	-2.84731	-2.84731	-2.81341	-2.81341	-2.81341	-2.81341	-2.78062	-2.78062	-2.78062	-2.74887	-2.74887	-2.74887	-2.7181	-2.7181	-2.68825	-2.65926	-2.63109	-2.60369	-2.60369	-2.57702	-2.57702	-2.57702	-2.55105
-3.34125	-3.33702	-3.32407	-3.30079	-3.2714	-3.24253	-3.21888	-3.21888	-3.21888	-3.17009	-3.17009	-3.12357	-3.12357	-3.07911	-3.07911	-3.03655	-3.03655	-3.03655	-2.99573	-2.99573	-2.99573	-2.95651	-2.91877	-2.91877	-2.8824	-2.84731	-2.84731	-2.84731	-2.84731	-2.81341	-2.81341	-2.81341	-2.78062	-2.78062	-2.78062	-2.78062	-2.74887	-2.74887	-2.74887	-2.7181	-2.7181	-2.68825	-2.65926	-2.63109	-2.60369	-2.60369	-2.57702	-2.57702	-2.57702	-2.55105
-3.34925	-3.34289	-3.32708	-3.30085	-3.26905	-3.23861	-3.21888	-3.21888	-3.21888	-3.17009	-3.17009	-3.12357	-3.12357	-3.07911	-3.07911	-3.03655	-3.03655	-3.03655	-2.99573	-2.99573	-2.95651	-2.95651	-2.91877	-2.8824	-2.8824	-2.84731	-2.84731	-2.84731	-2.84731	-2.81341	-2.81341	-2.81341	-2.78062	-2.78062	-2.78062	-2.78062	-2.74887	-2.74887	-2.74887	-2.7181	-2.7181	-2.68825	-2.65926	-2.63109	-2.60369	-2.60369	-2.57702	-2.57702	-2.55105	-2.55105
-3.35194	-3.34381	-3.32572	-3.29722	-3.26366	-3.23219	-3.21888	-3.21888	-3.17009	-3.17009	-3.17009	-3.12357	-3.12357	-3.07911	-3.03655	-3.03655	-3.03655	-2.99573	-2.99573	-2.99573	-2.95651	-2.95651	-2.91877	-2.8824	-2.8824	-2.84731	-2.84731	-2.84731	-2.81341	-2.81341	-2.81341	-2.81341	-2.78062	-2.78062	-2.78062	-2.78062	-2.78062	-2.74887	-2.74887	-2.7181	-2.7181	-2.68825	-2.65926	-2.63109	-2.60369	-2.60369	-2.57702	-2.57702	-2.55105	-2.55105
-3.34539	-3.33655	-3.31767	-3.2885	-3.25457	-3.22303	-3.21888	-3.21888	-3.17009	-3.17009	-3.12357	-3.12357	-3.07911	-3.07911	-3.03655	-3.03655	-3.03655	-2.99573	-2.99573	-2.99573	-2.95651	-2.95651	-2.91877	-2.8824	-2.8824	-2.84731	-2.84731	-2.84731	-2.81341	-2.81341	-2.81341	-2.81341	-2.78062	-2.78062	-2.78062	-2.78062	-2.78062	-2.74887	-2.74887	-2.7181	-2.7181	-2.68825	-2.65926	-2.63109	-2.60369	-2.60369	-2.57702	-2.57702	-2.57702	-2.55105
-3.32949	-3.32141	-3.30366	-3.27574	-3.24288	-3.21888	-3.21888	-3.17009	-3.17009	-3.17009	-3.12357	-3.12357	-3.07911	-3.07911	-3.03655	-3.03655	-2.99573	-2.99573	-2.99573	-2.99573	-2.95651	-2.95651	-2.91877	-2.8824	-2.8824	-2.84731	-2.84731	-2.84731	-2.81341	-2.81341	-2.81341	-2.81341	-2.81341	-2.78062	-2.78062	-2.78062	-2.78062	-2.74887	-2.74887	-2.7181	-2.7181	-2.68825	-2.65926	-2.63109	-2.63109	-2.60369	-2.60369	-2.57702	-2.57702	-2.55105
-3.30952	-3.30354	-3.28866	-3.26364	-3.23306	-3.21888	-3.21888	-3.17009	-3.17009	-3.17009	-3.12357	-3.12357	-3.07911	-3.07911	-3.03655	-3.03655	-2.99573	-2.99573	-2.99573	-2.99573	-2.95651	-2.95651	-2.91877	-2.8824	-2.8824	-2.84731	-2.84731	-2.84731	-2.81341	-2.81341	-2.81341	-2.81341	-2.81341	-2.78062	-2.78062	-2.78062	-2.78062	-2.74887	-2.74887	-2.74887	-2.7181	-2.68825	-2.65926	-2.65926	-2.63109	-2.60369	-2.60369	-2.57702	-2.57702	-2.55105
-3.28994	-3.28676	-3.2756	-3.25427	-3.22642	-3.21888	-3.21888	-3.17009	-3.17009	-3.17009	-3.12357	-3.12357	-3.07911	-3.07911	-3.03655	-3.03655	-2.99573	-2.99573	-2.99573	-2.99573	-2.95651	-2.95651	-2.91877	-2.8824	-2.8824	-2.84731	-2.84731	-2.84731	-2.81341	-2.81341	-2.81341	-2.81341	-2.81341	-2.78062	-2.78062	-2.78062	-2.78062	-2.74887	-2.74887	-2.74887	-2.7181	-2.68825	-2.68825	-2.65926	-2.63109	-2.63109	-2.60369	-2.60369	-2.57702	-2.57702
-3.27431	-3.27375	-3.26609	-3.24823	-3.22286	-3.21888	-3.21888	-3.17009	-3.17009	-3.12357	-3.12357	-3.12357	-3.07911	-3.07911	-3.03655	-3.03655	-3.03655	-2.99573	-2.99573	-2.99573	-2.95651	-2.95651	-2.91877	-2.8824	-2.8824	-2.84731	-2.84731	-2.84731	-2.84731	-2.81341	-2.81341	-2.81341	-2.81341	-2.81341	-2.78062	-2.78062	-2.78062	-2.78062	-2.74887	-2.74887	-2.7181	-2.7181	-2.68825	-2.65926	-2.63109	-2.63109	-2.60369	-2.60369	-2.57702	-2.57702
-3.26421	-3.26543	-3.26019	-3.24475	-3.22108	-3.21888	-3.21888	-3.17009	-3.17009	-3.12357	-3.12357	-3.12357	-3.07911	-3.07911	-3.03655	-3.03655	-3.03655	-2.99573	-2.99573	-2.99573	-2.99573	-2.95651	-2.91877	-2.91877	-2.8824	-2.8824	-2.84731	-2.84731	-2.84731	-2.84731	-2.81341	-2.81341	-2.81341	-2.81341	-2.78062	-2.78062	-2.78062	-2.78062	-2.74887	-2.74887	-2.7181	-2.7181	-2.68825	-2.65926	-2.65926	-2.63109	-2.63109	-2.60369	-2.60369	-2.57702
-3.25975	-3.26159	-3.25722	-3.24269	-3.21958	-3.21888	-3.21888	-3.17009	-3.17009	-3.17009	-3.12357	-3.12357	-3.07911	-3.07911	-3.03655	-3.03655	-3.03655	-3.03655	-2.99573	-2.99573	-2.99573	-2.95651	-2.95651	-2.91877	-2.8824	-2.8824	-2.84731	-2.84731	-2.84731	-2.84731	-2.84731	-2.81341	-2.81341	-2.81341	-2.81341	-2.78062	-2.78062	-2.78062	-2.78062	-2.74887	-2.74887	-2.7181	-2.68825	-2.65926	-2.65926	-2.63109	-2.63109	-2.60369	-2.60369	-2.57702
-3.25781	-3.25916	-3.25414	-3.239	-3.21888	-3.21888	-3.17009	-3.17009	-3.17009	-3.12357	-3.12357	-3.12357	-3.07911	-3.07911	-3.03655	-3.03655	-3.03655	-3.03655	-3.03655	-2.99573	-2.99573	-2.95651	-2.95651	-2.91877	-2.91877	-2.8824	-2.8824	-2.84731	-2.84731	-2.84731	-2.84731	-2.84731	-2.81341	-2.81341	-2.81341	-2.81341	-2.78062	-2.78062	-2.78062	-2.74887	-2.74887	-2.7181	-2.68825	-2.68825	-2.65926	-2.63109	-2.63109	-2.60369	-2.60369	-2.57702
-3.25405	-3.25426	-3.24767	-3.23102	-3.21888	-3.21888	-3.17009	-3.17009	-3.17009	-3.12357	-3.12357	-3.12357	-3.07911	-3.07911	-3.03655	-3.03655	-3.03655	-3.03655	-3.03655	-2.99573	-2.99573	-2.99573	-2.95651	-2.91877	-2.91877	-2.8824	-2.8824	-2.84731	-2.84731	-2.84731	-2.84731	-2.84731	-2.81341	-2.81341	-2.81341	-2.81341	-2.78062	-2.78062	-2.78062	-2.78062	-2.74887	-2.7181	-2.7181	-2.68825	-2.65926	-2.63109	-2.63109	-2.60369	-2.60369	-2.57702
-3.24494	-3.24394	-3.23561	-3.21888	-3.21888	-3.17009	-3.17009	-3.17009	-3.12357	-3.12357	-3.12357	-3.12357	-3.07911	-3.07911	-3.03655	-3.03655	-3.03655	-3.03655	-3.03655	-2.99573	-2.99573	-2.99573	-2.95651	-2.91877	-2.91877	-2.8824	-2.8824	-2.84731	-2.84731	-2.84731	-2.84731	-2.84731	-2.81341	-2.81341	-2.81341	-2.81341	-2.78062	-2.78062	-2.78062	-2.78062	-2.74887	-2.7181	-2.7181	-2.68825	-2.65926	-2.63109	-2.63109	-2.60369	-2.57702	-2.57702
-3.22815	-3.22634	-3.21888	-3.21888	-3.17009	-3.17009	-3.12357	-3.12357	-3.12357	-3.12357	-3.07911	-3.07911	-3.07911	-3.03655	-3.03655	-3.03655	-3.03655	-2.99573	-2.99573	-2.99573	-2.99573	-2.99573	-2.95651	-2.91877	-2.91877	-2.8824	-2.8824	-2.84731	-2.84731	-2.84731	-2.84731	-2.81341	-2.81341	-2.81341	-2.81341	-2.78062	-2.78062	-2.78062	-2.78062	-2.74887	-2.74887	-2.7181	-2.68825	-2.65926	-2.65926	-2.63109	-2.60369	-2.60369	-2.57702	-2.55105
-3.21888	-3.21888	-3.21888	-3.21888	-3.17009	-3.12357	-3.12357	-3.07911	-3.07911	-3.07911	-3.07911	-3.07911	-3.03655	-3.03655	-2.99573	-2.99573	-2.99573	-2.99573	-2.99573	-2.99573	-2.99573	-2.95651	-2.95651	-2.91877	-2.8824	-2.8824	-2.84731	-2.84731	-2.84731	-2.81341	-2.81341	-2.81341	-2.81341	-2.78062	-2.78062	-2.78062	-2.78062	-2.78062	-2.74887	-2.74887	-2.7181	-2.7181	-2.68825	-2.65926	-2.63109	-2.60369	-2.60369	-2.57702	-2.55105	-2.52573
-3.21888	-3.21888	-3.17009	-3.17009	-3.12357	-3.12357	-3.07911	-3.07911	-3.07911	-3.03655	-3.03655	-3.03655	-3.03655	-2.99573	-2.99573	-2.99573	-2.99573	-2.99573	-2.99573	-2.99573	-2.95651	-2.95651	-2.91877	-2.91877	-2.8824	-2.84731	-2.84731	-2.81341	-2.81341	-2.81341	-2.81341	-2.78062	-2.78062	-2.78062	-2.78062	-2.74887	-2.74887	-2.74887	-2.74887	-2.7181	-2.7181	-2.68825	-2.65926	-2.63109	-2.63109	-2.60369	-2.57702	-2.55105	-2.52573	-2.50104
-3.17009	-3.17009	-3.17009	-3.12357	-3.12357	-3.07911	-3.07911	-3.03655	-3.03655	-3.03655	-3.03655	-2.99573	-2.99573	-2.99573	-2.95651	-2.95651	-2.95651	-2.95651	-2.95651	-2.95651	-2.95651	-2.91877	-2.91877	-2.8824	-2.84731	-2.84731	-2.81341	-2.81341	-2.81341	-2.78062	-2.78062	-2.78062	-2.78062	-2.74887	-2.74887	-2.74887	-2.74887	-2.7181	-2.7181	-2.7181	-2.68825	-2.65926	-2.65926	-2.63109	-2.60369	-2.57702	-2.55105	-2.52573	-2.50104	-2.47694
-3.17009	-3.17009	-3.12357	-3.12357	-3.07911	-3.07911	-3.03655	-3.03655	-3.03655	-2.99573	-2.99573	-2.99573	-2.99573	-2.95651	-2.95651	-2.95651	-2.95651	-2.95651	-2.95651	-2.95651	-2.95651	-2.91877	-2.91877	-2.8824	-2.84731	-2.84731	-2.81341	-2.81341	-2.78062	-2.78062	-2.78062	-2.74887	-2.74887	-2.74887	-2.74887	-2.7181	-2.7181	-2.7181	-2.68825	-2.68825	-2.65926	-2.65926	-2.63109	-2.60369	-2.57702	-2.55105	-2.52573	-2.50104	-2.47694	-2.45341
-3.17009	-3.17009	-3.12357	-3.12357	-3.07911	-3.07911	-3.03655	-3.03655	-2.99573	-2.99573	-2.99573	-2.99573	-2.95651	-2.95651	-2.95651	-2.95651	-2.95651	-2.95651	-2.95651	-2.95651	-2.91877	-2.91877	-2.8824	-2.8824	-2.84731	-2.81341	-2.81341	-2.78062	-2.78062	-2.78062	-2.74887	-2.74887	-2.74887	-2.74887	-2.7181	-2.7181	-2.7181	-2.68825	-2.68825	-2.65926	-2.65926	-2.63109	-2.60369	-2.57702	-2.55105	-2.52573	-2.50104	-2.47694	-2.45341	-2.43042
-3.17009	-3.12357	-3.12357	-3.12357	-3.07911	-3.03655	-3.03655	-2.99573	-2.99573	-2.99573	-2.99573	-2.99573	-2.95651	-2.95651	-2.95651	-2.95651	-2.95651	-2.95651	-2.95651	-2.95651	-2.91877	-2.91877	-2.8824	-2.8824	-2.84731	-2.81341	-2.81341	-2.78062	-2.78062	-2.78062	-2.74887	-2.74887	-2.74887	-2.7181	-2.7181	-2.7181	-2.68825	-2.68825	-2.65926	-2.65926	-2.63109	-2.63109	-2.60369	-2.57702	-2.55105	-2.50104	-2.47694	-2.45341	-2.43042	-2.40795
-3.17009	-3.12357	-3.12357	-3.12357	-3.07911	-3.03655	-2.99573	-2.99573	-2.99573	-2.99573	-2.99573	-2.95651	-2.95651	-2.95651	-2.95651	-2.95651	-2.95651	-2.95651	-2.95651	-2.95651	-2.91877	-2.91877	-2.8824	-2.8824	-2.84731	-2.81341	-2.81341	-2.78062	-2.78062	-2.78062	-2.74887	-2.74887	-2.7181	-2.7181	-2.7181	-2.68825	-2.68825	-2.65926	-2.65926	-2.63109	-2.63109	-2.60369	-2.57702	-2.55105	-2.52573	-2.50104	-2.45341	-2.43042	-2.40795	-2.38597
-3.17009	-3.12357	-3.12357	-3.07911	-3.07911	-3.03655	-2.99573	-2.99573	-2.95651	-2.95651	-2.95651	-2.95651	-2.95651	-2.95651	-2.95651	-2.95651	-2.95651	-2.95651	-2.95651	-2.95651	-2.91877	-2.91877	-2.8824	-2.8824	-2.84731	-2.84731	-2.81341	-2.78062	-2.78062	-2.78062	-2.74887	-2.74887	-2.7181	-2.7181	-2.68825	-2.68825	-2.65926	-2.65926	-2.63109	-2.63109	-2.60369	-2.60369	-2.57702	-2.55105	-2.50104	-2.47694	-2.45341	-2.40795	-2.38597	-2.36446
-3.12357	-3.12357	-3.12357	-3.07911	-3.03655	-2.99573	-2.95651	-2.95651	-2.95651	-2.95651	-2.95651	-2.95651	-2.95651	-2.95651	-2.91877	-2.91877	-2.91877	-2.91877	-2.91877	-2.91877	-2.91877	-2.91877	-2.8824	-2.8824	-2.84731	-2.84731	-2.81341	-2.78062	-2.78062	-2.74887	-2.74887	-2.74887	-2.7181	-2.7181	-2.68825	-2.68825	-2.65926	-2.65926	-2.63109	-2.63109	-2.60369	-2.57702	-2.55105	-2.52573	-2.50104	-2.45341	-2.43042	-2.40795	-2.36446	-2.34341
-3.12357	-3.12357	-3.07911	-3.07911	-3.03655	-2.99573	-2.95651	-2.91877	-2.91877	-2.91877	-2.91877	-2.91877	-2.91877	-2.91877	-2.91877	-2.91877	-2.91877	-2.91877	-2.91877	-2.91877	-2.91877	-2.91877	-2.8824	-2.8824	-2.84731	-2.84731	-2.81341	-2.78062	-2.78062	-2.74887	-2.74887	-2.7181	-2.7181	-2.7181	-2.68825	-2.68825	-2.65926	-2.65926	-2.63109	-2.60369	-2.60369	-2.57702	-2.55105	-2.52573	-2.50104	-2.45341	-2.43042	-2.38597	-2.36446	-2.34341
-3.12357	-3.12357	-3.07911	-3.03655	-2.99573	-2.95651	-2.91877	-2.91877	-2.91877	-2.91877	-2.91877	-2.91877	-2.91877	-2.91877	-2.91877	-2.91877	-2.91877	-2.91877	-2.91877	-2.91877	-2.91877	-2.91877	-2.8824	-2.8824	-2.84731	-2.84731	-2.81341	-2.78062	-2.78062	-2.74887	-2.74887	-2.7181	-2.7181	-2.7181	-2.68825	-2.68825	-2.65926	-2.65926	-2.63109	-2.63109	-2.60369	-2.57702	-2.55105	-2.52573	-2.50104	-2.45341	-2.43042	-2.38597	-2.36446	-2.34341
-3.12357	-3.12357	-3.07911	-3.03655	-2.99573	-2.95651	-2.91877	-2.91877	-2.91877	-2.91877	-2.91877	-2.91877	-2.91877	-2.91877	-2.91877	-2.91877	-2.91877	-2.91877	-2.91877	-2.91877	-2.91877	-2.91877	-2.8824	-2.8824	-2.84731	-2.84731	-2.81341	-2.81341	-2.78062	-2.78062	-2.74887	-2.74887	-2.7181	-2.7181	-2.68825	-2.68825	-2.68825	-2.65926	-2.63109	-2.63109	-2.60369	-2.57702	-2.55105	-2.52573	-2.50104	-2.45341	-2.43042	-2.38597	-2.36446	-2.32279
-3.12357	-3.12357	-3.07911	-3.07911	-3.03655	-2.95651	-2.95651	-2.91877	-2.91877	-2.91877	-2.91877	-2.91877	-2.91877	-2.91877	-2.91877	-2.91877	-2.91877	-2.91877	-2.91877	-2.91877	-2.91877	-2.91877	-2.8824	-2.8824	-2.84731	-2.84731	-2.81341	-2.81341	-2.78062	-2.78062	-2.74887	-2.74887	-2.74887	-2.7181	-2.7181	-2.68825	-2.68825	-2.65926	-2.65926	-2.63109	-2.60369	-2.57702	-2.55105	-2.52573	-2.50104	-2.45341	-2.43042	-2.38597	-2.36446	-2.34341
-3.12357	-3.12357	-3.12357	-3.07911	-3.03655	-2.99573	-2.95651	-2.91877	-2.91877	-2.91877	-2.91877	-2.95651	-2.95651	-2.95651	-2.95651	-2.95651	-2.91877	-2.91877	-2.91877	-2.91877	-2.91877	-2.91877	-2.91877	-2.8824	-2.8824	-2.84731	-2.84731	-2.81341	-2.81341	-2.78062	-2.78062	-2.74887	-2.74887	-2.74887	-2.7181	-2.7181	-2.68825	-2.68825	-2.65926	-2.63109	-2.63109	-2.60369	-2.57702	-2.52573	-2.50104	-2.45341	-2.43042	-2.38597	-2.36446	-2.34341
-3.17009	-3.17009	-3.12357	-3.07911	-3.03655	-2.99573	-2.95651	-2.95651	-2.91877	-2.91877	-2.95651	-2.95651	-2.95651	-2.95651	-2.95651	-2.95651	-2.95651	-2.95651	-2.95651	-2.95651	-2.95651	-2.91877	-2.91877	-2.91877	-2.8824	-2.8824	-2.84731	-2.84731	-2.81341	-2.81341	-2.78062	-2.78062	-2.74887	-2.74887	-2.74887	-2.7181	-2.7181	-2.68825	-2.65926	-2.63109	-2.63109	-2.60369	-2.57702	-2.52573	-2.50104	-2.45341	-2.43042	-2.38597	-2.36446	-2.32279
-3.17009	-3.17009	-3.12357	-3.07911	-3.03655	-2.99573	-2.95651	-2.95651	-2.91877	-2.95651	-2.95651	-2.95651	-2.95651	-2.95651	-2.95651	-2.95651	-2.95651	-2.95651	-2.95651	-2.95651	-2.95651	-2.95651	-2.91877	-2.91877	-2.8824	-2.8824	-2.84731	-2.84731	-2.81341	-2.81341	-2.78062	-2.78062	-2.74887	-2.74887	-2.74887	-2.7181	-2.7181	-2.68825	-2.65926	-2.63109	-2.63109	-2.60369	-2.57702	-2.52573	-2.50104	-2.45341	-2.40795	-2.38597	-2.34341	-2.32279
-3.17009	-3.17009	-3.12357	-3.07911	-3.03655	-2.99573	-2.95651	-2.91877	-2.91877	-2.91877	-2.95651	-2.95651	-2.95651	-2.95651	-2.95651	-2.95651	-2.95651	-2.95651	-2.95651	-2.95651	-2.95651	-2.95651	-2.91877	-2.91877	-2.91877	-2.8824	-2.8824	-2.84731	-2.81341	-2.81341	-2.78062	-2.78062	-2.74887	-2.74887	-2.74887	-2.7181	-2.7181	-2.68825	-2.65926	-2.63109	-2.60369	-2.57702	-2.55105	-2.52573	-2.47694	-2.45341	-2.40795	-2.36446	-2.34341	-2.30259
-3.17009	-3.12357	-3.12357	-3.07911	-3.03655	-2.95651	-2.91877	-2.91877	-2.8824	-2.91877	-2.91877	-2.95651	-2.95651	-2.95651	-2.95651	-2.95651	-2.95651	-2.95651	-2.95651	-2.95651	-2.95651	-2.95651	-2.91877	-2.91877	-2.91877	-2.8824	-2.84731	-2.84731	-2.81341	-2.81341	-2.78062	-2.78062	-2.74887	-2.74887	-2.74887	-2.7181	-2.68825	-2.68825	-2.65926	-2.63109	-2.60369	-2.57702	-2.55105	-2.50104	-2.47694	-2.43042	-2.38597	-2.36446	-2.32279	-2.28278
-3.12357	-3.12357	-3.07911	-3.03655	-2.95651	-2.91877	-2.8824	-2.84731	-2.84731	-2.84731	-2.8824	-2.91877	-2.91877	-2.91877	-2.91877	-2.91877	-2.91877	-2.91877	-2.91877	-2.91877	-2.91877	-2.91877	-2.91877	-2.91877	-2.8824	-2.8824	-2.84731	-2.84731	-2.81341	-2.78062	-2.78062	-2.74887	-2.74887	-2.74887	-2.7181	-2.7181	-2.68825	-2.65926	-2.65926	-2.63109	-2.60369	-2.57702	-2.55105	-2.50104	-2.45341	-2.43042	-2.38597	-2.34341	-2.30259	-2.28278
-3.07911	-3.07911	-3.03655	-2.95651	-2.91877	-2.84731	-2.81341	-2.81341	-2.81341	-2.81341	-2.81341	-2.84731	-2.8824	-2.8824	-2.91877	-2.91877	-2.8824	-2.8824	-2.91877	-2.91877	-2.91877	-2.91877	-2.91877	-2.8824	-2.8824	-2.84731	-2.84731	-2.81341	-2.81341	-2.78062	-2.78062	-2.74887	-2.74887	-2.7181	-2.7181	-2.68825	-2.68825	-2.65926	-2.63109	-2.63109	-2.60369	-2.57702	-2.52573	-2.50104	-2.45341	-2.40795	-2.36446	-2.34341	-2.30259	-2.26336
-3.03655	-2.99573	-2.95651	-2.91877	-2.84731	-2.81341	-2.74887	-2.74887	-2.74887	-2.74887	-2.78062	-2.81341	-2.84731	-2.84731	-2.84731	-2.8824	-2.8824	-2.8824	-2.8824	-2.8824	-2.8824	-2.8824	-2.8824	-2.8824	-2.8824	-2.84731	-2.81341	-2.81341	-2.78062	-2.78062	-2.74887	-2.74887	-2.7181	-2.7181	-2.68825	-2.68825	-2.68825	-2.65926	-2.63109	-2.60369	-2.60369	-2.55105	-2.52573	-2.50104	-2.45341	-2.40795	-2.36446	-2.34341	-2.30259	-2.26336
-2.99573	-2.95651	-2.91877	-2.84731	-2.78062	-2.74887	-2.7181	-2.68825	-2.68825	-2.68825	-2.7181	-2.74887	-2.78062	-2.81341	-2.81341	-2.84731	-2.84731	-2.84731	-2.84731	-2.84731	-2.8824	-2.8824	-2.8824	-2.8824	-2.84731	-2.84731	-2.81341	-2.78062	-2.78062	-2.74887	-2.74887	-2.74887	-2.7181	-2.7181	-2.68825	-2.68825	-2.65926	-2.65926	-2.63109	-2.60369	-2.60369	-2.57702	-2.52573	-2.50104	-2.45341	-2.43042	-2.38597	-2.34341	-2.30259	-2.26336
-2.95651	-2.91877	-2.8824	-2.81341	-2.74887	-2.68825	-2.65926	-2.63109	-2.63109	-2.65926	-2.68825	-2.7181	-2.74887	-2.78062	-2.81341	-2.81341	-2.81341	-2.81341	-2.81341	-2.84731	-2.84731	-2.84731	-2.8824	-2.84731	-2.84731	-2.81341	-2.81341	-2.78062	-2.78062	-2.74887	-2.74887	-2.7181	-2.7181	-2.7181	-2.68825	-2.68825	-2.65926	-2.65926	-2.63109	-2.63109	-2.60369	-2.57702	-2.55105	-2.50104	-2.47694	-2.43042	-2.38597	-2.34341	-2.32279	-2.28278
-2.91877	-2.8824	-2.84731	-2.78062	-2.7181	-2.65926	-2.63109	-2.60369	-2.60369	-2.63109	-2.65926	-2.68825	-2.7181	-2.74887	-2.78062	-2.78062	-2.81341	-2.81341	-2.81341	-2.81341	-2.84731	-2.84731	-2.84731	-2.84731	-2.84731	-2.81341	-2.81341	-2.78062	-2.78062	-2.74887	-2.74887	-2.7181	-2.7181	-2.7181	-2.68825	-2.68825	-2.68825	-2.65926	-2.65926	-2.63109	-2.60369	-2.57702	-2.55105	-2.52573	-2.47694	-2.43042	-2.40795	-2.36446	-2.32279	-2.28278
-2.8824	-2.84731	-2.81341	-2.74887	-2.68825	-2.65926	-2.60369	-2.60369	-2.60369	-2.60369	-2.63109	-2.68825	-2.7181	-2.74887	-2.78062	-2.78062	-2.78062	-2.81341	-2.81341	-2.81341	-2.84731	-2.84731	-2.84731	-2.84731	-2.84731	-2.81341	-2.81341	-2.78062	-2.78062	-2.74887	-2.74887	-2.74887	-2.7181	-2.7181	-2.68825	-2.68825	-2.68825	-2.65926	-2.65926	-2.63109	-2.60369	-2.57702	-2.55105	-2.52573	-2.47694	-2.45341	-2.40795	-2.36446	-2.32279	-2.30259
-2.8824	-2.84731	-2.81341	-2.74887	-2.68825	-2.63109	-2.60369	-2.57702	-2.57702	-2.60369	-2.63109	-2.65926	-2.7181	-2.74887	-2.78062	-2.78062	-2.78062	-2.78062	-2.81341	-2.81341	-2.84731	-2.84731	-2.84731	-2.84731	-2.84731	-2.81341	-2.81341	-2.78062	-2.78062	-2.74887	-2.74887	-2.74887	-2.7181	-2.7181	-2.7181	-2.68825	-2.68825	-2.68825	-2.65926	-2.63109	-2.63109	-2.60369	-2.57702	-2.52573	-2.50104	-2.45341	-2.40795	-2.38597	-2.34341	-2.30259
-2.84731	-2.81341	-2.78062	-2.7181	-2.65926	-2.63109	-2.57702	-2.57702	-2.57702	-2.57702	-2.63109	-2.65926	-2.7181	-2.74887	-2.78062	-2.78062	-2.78062	-2.78062	-2.81341	-2.81341	-2.84731	-2.84731	-2.84731	-2.84731	-2.84731	-2.81341	-2.81341	-2.78062	-2.78062	-2.74887	-2.74887	-2.74887	-2.7181	-2.7181	-2.7181	-2.68825	-2.68825	-2.68825	-2.65926	-2.63109	-2.63109	-2.60369	-2.57702	-2.52573	-2.50104	-2.45341	-2.43042	-2.38597	-2.34341	-2.30259
-2.84731	-2.81341	-2.78062	-2.7181	-2.65926	-2.60369	-2.57702	-2.55105	-2.55105	-2.57702	-2.60369	-2.65926	-2.68825	-2.74887	-2.74887	-2.78062	-2.78062	-2.78062	-2.81341	-2.81341	-2.84731	-2.84731	-2.84731	-2.84731	-2.84731	-2.81341	-2.81341	-2.78062	-2.78062	-2.74887	-2.74887	-2.74887	-2.7181	-2.7181	-2.7181	-2.68825	-2.68825	-2.68825	-2.65926	-2.65926	-2.63109	-2.60369	-2.57702	-2.52573	-2.50104	-2.45341	-2.43042	-2.38597	-2.34341	-2.30259
-2.81341	-2.81341	-2.78062	-2.7181	-2.65926	-2.60369	-2.57702	-2.55105	-2.55105	-2.57702	-2.60369	-2.65926	-2.68825	-2.7181	-2.74887	-2.78062	-2.78062	-2.78062	-2.81341	-2.81341	-2.84731	-2.84731	-2.84731	-2.84731	-2.84731	-2.81341	-2.81341	-2.78062	-2.78062	-2.74887	-2.74887	-2.74887	-2.7181	-2.7181	-2.7181	-2.68825	-2.68825	-2.68825	-2.65926	-2.65926	-2.63109	-2.60369	-2.57702	-2.55105	-2.50104	-2.47694	-2.43042	-2.38597	-2.34341	-2.32279
-2.81341	-2.81341	-2.74887	-2.7181	-2.63109	-2.60369	-2.55105	-2.52573	-2.55105	-2.55105	-2.60369	-2.63109	-2.68825	-2.7181	-2.74887	-2.78062	-2.78062	-2.78062	-2.81341	-2.81341	-2.84731	-2.84731	-2.84731	-2.84731	-2.84731	-2.81341	-2.81341	-2.78062	-2.78062	-2.74887	-2.74887	-2.74887	-2.7181	-2.7181	-2.7181	-2.68825	-2.68825	-2.68825	-2.65926	-2.65926	-2.63109	-2.60369	-2.57702	-2.55105	-2.50104	-2.47694	-2.43042	-2.38597	-2.34341	-2.32279
-2.81341	-2.78062	-2.74887	-2.68825	-2.63109	-2.57702	-2.55105	-2.52573	-2.52573	-2.55105	-2.57702	-2.63109	-2.68825	-2.7181	-2.74887	-2.78062	-2.78062	-2.78062	-2.78062	-2.81341	-2.81341	-2.84731	-2.84731	-2.84731	-2.84731	-2.81341	-2.81341	-2.78062	-2.78062	-2.78062	-2.74887	-2.74887	-2.7181	-2.7181	-2.7181	-2.68825	-2.68825	-2.68825	-2.68825	-2.65926	-2.63109	-2.63109	-2.57702	-2.55105	-2.52573	-2.47694	-2.43042	-2.38597	-2.36446	-2.32279
-2.81341	-2.78062	-2.74887	-2.68825	-2.63109	-2.57702	-2.52573	-2.52573	-2.52573	-2.55105	-2.57702	-2.63109	-2.65926	-2.7181	-2.74887	-2.78062	-2.78062	-2.78062	-2.78062	-2.81341	-2.81341	-2.84731	-2.84731	-2.84731	-2.84731	-2.81341	-2.81341	-2.78062	-2.78062	-2.78062	-2.74887	-2.74887	-2.7181	-2.7181	-2.7181	-2.7181	-2.68825	-2.68825	-2.68825	-2.65926	-2.65926	-2.63109	-2.60369	-2.57702	-2.52573	-2.47694	-2.45341	-2.40795	-2.36446	-2.32279
-2.81341	-2.78062	-2.74887	-2.68825	-2.60369	-2.55105	-2.52573	-2.50104	-2.50104	-2.52573	-2.57702	-2.60369	-2.65926	-2.7181	-2.74887	-2.74887	-2.78062	-2.78062	-2.78062	-2.81341	-2.81341	-2.84731	-2.84731	-2.84731	-2.84731	-2.81341	-2.81341	-2.78062	-2.78062	-2.78062	-2.74887	-2.74887	-2.7181	-2.7181	-2.7181	-2.7181	-2.7181	-2.7181	-2.68825	-2.68825	-2.65926	-2.63109	-2.60369	-2.57702	-2.52573	-2.50104	-2.45341	-2.40795	-2.36446	-2.32279
-2.81341	-2.78062	-2.7181	-2.65926	-2.60369	-2.55105	-2.50104	-2.47694	-2.50104	-2.50104	-2.55105	-2.60369	-2.65926	-2.68825	-2.74887	-2.74887	-2.74887	-2.78062	-2.78062	-2.78062	-2.81341	-2.84731	-2.84731	-2.84731	-2.81341	-2.81341	-2.81341	-2.78062	-2.78062	-2.78062	-2.74887	-2.74887	-2.74887	-2.7181	-2.7181	-2.7181	-2.7181	-2.7181	-2.7181	-2.68825	-2.68825	-2.65926	-2.63109	-2.57702	-2.55105	-2.50104	-2.47694	-2.43042	-2.38597	-2.34341
-2.81341	-2.74887	-2.7181	-2.65926	-2.57702	-2.52573	-2.47694	-2.47694	-2.47694	-2.50104	-2.52573	-2.57702	-2.63109	-2.68825	-2.7181	-2.74887	-2.74887	-2.74887	-2.78062	-2.78062	-2.81341	-2.81341	-2.84731	-2.84731	-2.81341	-2.81341	-2.81341	-2.78062	-2.78062	-2.78062	-2.74887	-2.74887	-2.74887	-2.7181	-2.7181	-2.7181	-2.7181	-2.7181	-2.7181	-2.68825	-2.68825	-2.65926	-2.63109	-2.60369	-2.55105	-2.50104	-2.47694	-2.43042	-2.38597	-2.34341
-2.78062	-2.74887	-2.68825	-2.63109	-2.55105	-2.50104	-2.47694	-2.45341	-2.45341	-2.47694	-2.52573	-2.57702	-2.63109	-2.65926	-2.7181	-2.7181	-2.74887	-2.74887	-2.74887	-2.78062	-2.78062	-2.81341	-2.81341	-2.81341	-2.81341	-2.81341	-2.78062	-2.78062	-2.78062	-2.74887	-2.74887	-2.74887	-2.7181	-2.7181	-2.7181	-2.7181	-2.7181	-2.7181	-2.7181	-2.68825	-2.68825	-2.65926	-2.63109	-2.57702	-2.55105	-2.50104	-2.47694	-2.43042	-2.38597	-2.34341
-2.78062	-2.74887	-2.68825	-2.60369	-2.55105	-2.47694	-2.45341	-2.43042	-2.43042	-2.45341	-2.50104	-2.55105	-2.60369	-2.65926	-2.68825	-2.7181	-2.7181	-2.7181	-2.74887	-2.74887	-2.78062	-2.78062	-2.81341	-2.81341	-2.81341	-2.78062	-2.78062	-2.78062	-2.74887	-2.74887	-2.74887	-2.7181	-2.7181	-2.7181	-2.7181	-2.7181	-2.7181	-2.7181	-2.68825	-2.68825	-2.65926	-2.65926	-2.60369	-2.57702	-2.55105	-2.50104	-2.47694	-2.43042	-2.38597	-2.34341
-2.74887	-2.7181	-2.65926	-2.60369	-2.52573	-2.47694	-2.43042	-2.40795	-2.40795	-2.43042	-2.47694	-2.52573	-2.57702	-2.63109	-2.65926	-2.68825	-2.7181	-2.7181	-2.7181	-2.74887	-2.74887	-2.78062	-2.78062	-2.78062	-2.78062	-2.78062	-2.78062	-2.74887	-2.74887	-2.74887	-2.7181	-2.7181	-2.7181	-2.68825	-2.68825	-2.68825	-2.68825	-2.68825	-2.68825	-2.68825	-2.65926	-2.63109	-2.60369	-2.57702	-2.52573	-2.50104	-2.45341	-2.40795	-2.36446	-2.32279
-2.74887	-2.7181	-2.65926	-2.57702	-2.52573	-2.45341	-2.40795	-2.40795	-2.40795	-2.43042	-2.45341	-2.52573	-2.57702	-2.63109	-2.65926	-2.68825	-2.68825	-2.68825	-2.7181	-2.7181	-2.74887	-2.74887	-2.78062	-2.78062	-2.78062	-2.74887	-2.74887	-2.74887	-2.74887	-2.7181	-2.7181	-2.7181	-2.68825	-2.68825	-2.68825	-2.68825	-2.68825	-2.68825	-2.68825	-2.65926	-2.63109	-2.63109	-2.57702	-2.55105	-2.52573	-2.47694	-2.45341	-2.40795	-2.36446	-2.32279
-2.74887	-2.7181	-2.65926	-2.57702	-2.50104	-2.45341	-2.40795	-2.38597	-2.38597	-2.40795	-2.45341	-2.50104	-2.55105	-2.60369	-2.65926	-2.65926	-2.68825	-2.68825	-2.68825	-2.7181	-2.7181	-2.74887	-2.74887	-2.74887	-2.74887	-2.74887	-2.74887	-2.74887	-2.7181	-2.7181	-2.7181	-2.68825	-2.68825	-2.68825	-2.68825	-2.65926	-2.65926	-2.65926	-2.65926	-2.65926	-2.63109	-2.60369	-2.57702	-2.55105	-2.52573	-2.47694	-2.45341	-2.40795	-2.38597	-2.34341
-2.74887	-2.68825	-2.63109	-2.57702	-2.50104	-2.43042	-2.38597	-2.38597	-2.38597	-2.40795	-2.43042	-2.50104	-2.55105	-2.60369	-2.63109	-2.65926	-2.68825	-2.68825	-2.68825	-2.68825	-2.7181	-2.7181	-2.74887	-2.74887	-2.74887	-2.74887	-2.74887	-2.7181	-2.7181	-2.7181	-2.7181	-2.68825	-2.68825	-2.68825	-2.65926	-2.65926	-2.65926	-2.65926	-2.65926	-2.65926	-2.63109	-2.60369	-2.57702	-2.55105	-2.52573	-2.50104	-2.45341	-2.43042	-2.38597	-2.34341
-2.7181	-2.68825	-2.63109	-2.55105	-2.47694	-2.43042	-2.38597	-2.36446	-2.36446	-2.38597	-2.43042	-2.47694	-2.52573	-2.57702	-2.63109	-2.65926	-2.65926	-2.65926	-2.68825	-2.68825	-2.68825	-2.7181	-2.74887	-2.74887	-2.74887	-2.74887	-2.74887	-2.7181	-2.7181	-2.7181	-2.7181	-2.68825	-2.68825	-2.68825	-2.65926	-2.65926	-2.65926	-2.65926	-2.65926	-2.65926	-2.63109	-2.63109	-2.60369	-2.55105	-2.52573	-2.50104	-2.47694	-2.43042	-2.40795	-2.36446
-2.68825	-2.65926	-2.60369	-2.52573	-2.45341	-2.40795	-2.36446	-2.34341	-2.34341	-2.36446	-2.40795	-2.45341	-2.52573	-2.57702	-2.60369	-2.63109	-2.65926	-2.65926	-2.65926	-2.65926	-2.68825	-2.7181	-2.7181	-2.74887	-2.74887	-2.74887	-2.7181	-2.7181	-2.7181	-2.7181	-2.7181	-2.68825	-2.68825	-2.68825	-2.68825	-2.65926	-2.65926	-2.65926	-2.65926	-2.65926	-2.65926	-2.63109	-2.60369	-2.57702	-2.55105	-2.52573	-2.47694	-2.45341	-2.43042	-2.38597
-2.65926	-2.63109	-2.57702	-2.50104	-2.43042	-2.36446	-2.32279	-2.30259	-2.32279	-2.34341	-2.38597	-2.43042	-2.50104	-2.55105	-2.57702	-2.60369	-2.63109	-2.63109	-2.63109	-2.63109	-2.65926	-2.68825	-2.68825	-2.7181	-2.7181	-2.7181	-2.7181	-2.7181	-2.7181	-2.68825	-2.68825	-2.68825	-2.68825	-2.65926	-2.65926	-2.65926	-2.65926	-2.65926	-2.65926	-2.65926	-2.65926	-2.63109	-2.60369	-2.57702	-2.55105	-2.52573	-2.50104	-2.47694	-2.43042	-2.38597
-2.63109	-2.60369	-2.52573	-2.47694	-2.40795	-2.34341	-2.30259	-2.28278	-2.28278	-2.30259	-2.34341	-2.40795	-2.45341	-2.50104	-2.55105	-2.57702	-2.57702	-2.60369	-2.60369	-2.60369	-2.63109	-2.65926	-2.65926	-2.68825	-2.68825	-2.68825	-2.68825	-2.68825	-2.68825	-2.68825	-2.68825	-2.65926	-2.65926	-2.65926	-2.65926	-2.65926	-2.65926	-2.65926	-2.65926	-2.65926	-2.63109	-2.63109	-2.60369	-2.57702	-2.55105	-2.52573	-2.50104	-2.47694	-2.43042	-2.40795
-2.60369	-2.55105	-2.50104	-2.43042	-2.36446	-2.30259	-2.26336	-2.24432	-2.24432	-2.26336	-2.30259	-2.36446	-2.43042	-2.47694	-2.52573	-2.55105	-2.55105	-2.55105	-2.55105	-2.57702	-2.60369	-2.60369	-2.63109	-2.63109	-2.65926	-2.65926	-2.65926	-2.65926	-2.65926	-2.65926	-2.65926	-2.65926	-2.63109	-2.63109	-2.63109	-2.63109	-2.63109	-2.63109	-2.63109	-2.63109	-2.63109	-2.60369	-2.57702	-2.55105	-2.52573	-2.52573	-2.50104	-2.47694	-2.43042	-2.40795
-2.57702	-2.55105	-2.47694	-2.40795	-2.34341	-2.28278	-2.24432	-2.22562	-2.22562	-2.24432	-2.28278	-2.34341	-2.38597	-2.45341	-2.47694	-2.50104	-2.52573	-2.52573	-2.52573	-2.55105	-2.55105	-2.57702	-2.60369	-2.60369	-2.63109	-2.63109	-2.63109	-2.63109	-2.63109	-2.63109	-2.63109	-2.63109	-2.63109	-2.63109	-2.60369	-2.60369	-2.60369	-2.60369	-2.60369	-2.60369	-2.60369	-2.57702	-2.57702	-2.55105	-2.52573	-2.50104	-2.50104	-2.47694	-2.43042	-2.38597
-2.57702	-2.52573	-2.47694	-2.40795	-2.34341	-2.28278	-2.22562	-2.20727	-2.20727	-2.22562	-2.26336	-2.32279	-2.38597	-2.43042	-2.47694	-2.50104	-2.50104	-2.50104	-2.50104	-2.52573	-2.52573	-2.55105	-2.57702	-2.57702	-2.60369	-2.60369	-2.60369	-2.60369	-2.60369	-2.63109	-2.63109	-2.60369	-2.60369	-2.60369	-2.60369	-2.60369	-2.60369	-2.60369	-2.60369	-2.60369	-2.57702	-2.57702	-2.55105	-2.55105	-2.52573	-2.50104	-2.50104	-2.47694	-2.43042	-2.40795
-2.57702	-2.52573	-2.47694	-2.40795	-2.32279	-2.26336	-2.22562	-2.18926	-2.18926	-2.22562	-2.26336	-2.30259	-2.36446	-2.40795	-2.45341	-2.47694	-2.47694	-2.50104	-2.50104	-2.50104	-2.52573	-2.52573	-2.55105	-2.57702	-2.57702	-2.57702	-2.57702	-2.60369	-2.60369	-2.60369	-2.60369	-2.60369	-2.60369	-2.57702	-2.57702	-2.57702	-2.57702	-2.57702	-2.57702	-2.57702	-2.57702	-2.55105	-2.55105	-2.52573	-2.52573	-2.52573	-2.50104	-2.47694	-2.45341	-2.40795
-2.55105	-2.50104	-2.45341	-2.38597	-2.30259	-2.24432	-2.20727	-2.17156	-2.17156	-2.20727	-2.24432	-2.28278	-2.34341	-2.38597	-2.43042	-2.45341	-2.45341	-2.47694	-2.47694	-2.47694	-2.50104	-2.50104	-2.52573	-2.52573	-2.55105	-2.55105	-2.55105	-2.55105	-2.57702	-2.57702	-2.57702	-2.57702	-2.57702	-2.55105	-2.55105	-2.55105	-2.52573	-2.55105	-2.55105	-2.55105	-2.55105	-2.52573	-2.52573	-2.52573	-2.52573	-2.52573	-2.50104	-2.47694	-2.45341	-2.40795
-2.47694	-2.43042	-2.38597	-2.32279	-2.26336	-2.20727	-2.15417	-2.13707	-2.13707	-2.15417	-2.20727	-2.24432	-2.30259	-2.34341	-2.38597	-2.40795	-2.40795	-2.43042	-2.43042	-2.43042	-2.45341	-2.45341	-2.47694	-2.50104	-2.50104	-2.50104	-2.50104	-2.50104	-2.52573	-2.52573	-2.52573	-2.52573	-2.52573	-2.50104	-2.50104	-2.47694	-2.47694	-2.47694	-2.47694	-2.50104	-2.50104	-2.50104	-2.50104	-2.50104	-2.50104	-2.50104	-2.50104	-2.47694	-2.43042	-2.38597
-2.36446	-2.34341	-2.30259	-2.24432	-2.17156	-2.12026	-2.08747	-2.07147	-2.07147	-2.10373	-2.13707	-2.17156	-2.22562	-2.26336	-2.30259	-2.32279	-2.34341	-2.34341	-2.36446	-2.36446	-2.38597	-2.38597	-2.40795	-2.40795	-2.43042	-2.43042	-2.43042	-2.43042	-2.45341	-2.45341	-2.45341	-2.45341	-2.43042	-2.43042	-2.40795	-2.40795	-2.38597	-2.40795	-2.40795	-2.40795	-2.43042	-2.43042	-2.43042	-2.43042	-2.45341	-2.45341	-2.45341	-2.43042	-2.40795	-2.36446
-2.24432	-2.20727	-2.17156	-2.13707	-2.08747	-2.04022	-2.00992	-1.9951	-1.9951	-2.00992	-2.04022	-2.08747	-2.13707	-2.17156	-2.20727	-2.24432	-2.24432	-2.26336	-2.26336	-2.28278	-2.28278	-2.30259	-2.30259	-2.32279	-2.32279	-2.32279	-2.32279	-2.34341	-2.34341	-2.34341	-2.36446	-2.34341	-2.34341	-2.32279	-2.30259	-2.30259	-2.30259	-2.30259	-2.30259	-2.32279	-2.32279	-2.34341	-2.34341	-2.36446	-2.36446	-2.36446	-2.38597	-2.36446	-2.34341	-2.30259
-2.12026	-2.10373	-2.07147	-2.02495	-1.9805	-1.93794	-1.91054	-1.89712	-1.91054	-1.92415	-1.95193	-1.9951	-2.04022	-2.08747	-2.12026	-2.13707	-2.15417	-2.17156	-2.17156	-2.18926	-2.18926	-2.20727	-2.20727	-2.22562	-2.22562	-2.22562	-2.22562	-2.24432	-2.24432	-2.24432	-2.26336	-2.24432	-2.24432	-2.22562	-2.20727	-2.18926	-2.18926	-2.18926	-2.20727	-2.22562	-2.22562	-2.24432	-2.24432	-2.26336	-2.28278	-2.28278	-2.30259	-2.28278	-2.26336	-2.22562
-2.04022	-2.02495	-1.9951	-1.95193	-1.91054	-1.8708	-1.84516	-1.83258	-1.83258	-1.84516	-1.88387	-1.91054	-1.95193	-1.9951	-2.04022	-2.05573	-2.07147	-2.08747	-2.08747	-2.10373	-2.10373	-2.12026	-2.13707	-2.13707	-2.13707	-2.13707	-2.13707	-2.15417	-2.15417	-2.17156	-2.17156	-2.17156	-2.15417	-2.13707	-2.12026	-2.10373	-2.10373	-2.10373	-2.12026	-2.13707	-2.13707	-2.15417	-2.17156	-2.17156	-2.18926	-2.20727	-2.22562	-2.20727	-2.18926	-2.15417
-1.9951	-1.96611	-1.93794	-1.89712	-1.8579	-1.82016	-1.79577	-1.78379	-1.78379	-1.79577	-1.82016	-1.8579	-1.89712	-1.93794	-1.9805	-1.9951	-2.02495	-2.02495	-2.04022	-2.04022	-2.05573	-2.05573	-2.07147	-2.07147	-2.07147	-2.07147	-2.07147	-2.08747	-2.08747	-2.10373	-2.10373	-2.10373	-2.08747	-2.07147	-2.05573	-2.04022	-2.04022	-2.04022	-2.04022	-2.05573	-2.07147	-2.08747	-2.08747	-2.10373	-2.12026	-2.13707	-2.15417	-2.15417	-2.13707	-2.10373
-1.96611	-1.95193	-1.92415	-1.88387	-1.83258	-1.79577	-1.77196	-1.76026	-1.76026	-1.77196	-1.79577	-1.83258	-1.8708	-1.91054	-1.93794	-1.96611	-1.9805	-1.9951	-2.00992	-2.00992	-2.02495	-2.02495	-2.02495	-2.02495	-2.04022	-2.04022	-2.04022	-2.04022	-2.05573	-2.05573	-2.05573	-2.05573	-2.04022	-2.02495	-2.00992	-1.9951	-1.9951	-1.9951	-1.9951	-2.00992	-2.02495	-2.02495	-2.04022	-2.05573	-2.07147	-2.08747	-2.10373	-2.10373	-2.08747	-2.05573
-1.95193	-1.93794	-1.91054	-1.8708	-1.83258	-1.79577	-1.76026	-1.7487	-1.7487	-1.76026	-1.78379	-1.80789	-1.84516	-1.88387	-1.91054	-1.93794	-1.95193	-1.96611	-1.96611	-1.9805	-1.9805	-1.9805	-1.9805	-1.9805	-1.9805	-1.9805	-1.9951	-1.9951	-1.9951	-2.00992	-2.00992	-1.9951	-1.9951	-1.9805	-1.95193	-1.93794	-1.93794	-1.93794	-1.93794	-1.95193	NaN	NaN	NaN	NaN	NaN	NaN	NaN	NaN	NaN	NaN
NaN	NaN	NaN	NaN	NaN	NaN	NaN	NaN	NaN	NaN	NaN	NaN	NaN	NaN	NaN	NaN	NaN	NaN	NaN	NaN	NaN	NaN	NaN	NaN	NaN	NaN	NaN	NaN	NaN	NaN	NaN	NaN	NaN	NaN	NaN	NaN	NaN	NaN	NaN	NaN	NaN	NaN	NaN	NaN	NaN	NaN	NaN	NaN	NaN	NaN
NaN	NaN	NaN	NaN	NaN	NaN	NaN	NaN	NaN	NaN	NaN	NaN	NaN	NaN	NaN	NaN	NaN	NaN	NaN	NaN	NaN	NaN	NaN	NaN	NaN	NaN	NaN	NaN	NaN	NaN	NaN	NaN	NaN	NaN	NaN	NaN	NaN	NaN	NaN	NaN	NaN	NaN	NaN	NaN	NaN	NaN	NaN	NaN	NaN	NaN
NaN	NaN	NaN	NaN	NaN	NaN	NaN	NaN	NaN	NaN	NaN	NaN	NaN	NaN	NaN	NaN	NaN	NaN	NaN	NaN	NaN	NaN	NaN	NaN	NaN	NaN	NaN	NaN	NaN	NaN	NaN	NaN	NaN	NaN	NaN	NaN	NaN	NaN	NaN	NaN	NaN	NaN	NaN	NaN	NaN	NaN	NaN	NaN	NaN	NaN
NaN	NaN	NaN	NaN	NaN	NaN	NaN	NaN	NaN	NaN	NaN	NaN	NaN	NaN	NaN	NaN	NaN	NaN	NaN	NaN	NaN	NaN	NaN	NaN	NaN	NaN	NaN	NaN	NaN	NaN	NaN	NaN	NaN	NaN	NaN	NaN	NaN	NaN	NaN	NaN	NaN	NaN	NaN	NaN	NaN	NaN	NaN	NaN	NaN	NaN
NaN	NaN	NaN	NaN	NaN	NaN	NaN	NaN	NaN	NaN	NaN	NaN	NaN	NaN	NaN	NaN	NaN	NaN	NaN	NaN	NaN	NaN	NaN	NaN	NaN	NaN	NaN	NaN	NaN	NaN	NaN	NaN	NaN	NaN	NaN	NaN	NaN	NaN	NaN	NaN	NaN	NaN	NaN	NaN	NaN	NaN	NaN	NaN	NaN	NaN
NaN	NaN	NaN	NaN	NaN	NaN	NaN	NaN	NaN	NaN	NaN	NaN	NaN	NaN	NaN	NaN	NaN	NaN	NaN	NaN	NaN	NaN	NaN	NaN	NaN	NaN	NaN	NaN	NaN	NaN	NaN	NaN	NaN	NaN	NaN	NaN	NaN	NaN	NaN	NaN	NaN	NaN	NaN	NaN	NaN	NaN	NaN	NaN	NaN	NaN
NaN	NaN	NaN	NaN	NaN	NaN	NaN	NaN	NaN	NaN	NaN	NaN	NaN	NaN	NaN	NaN	NaN	NaN	NaN	NaN	NaN	NaN	NaN	NaN	NaN	NaN	NaN	NaN	NaN	NaN	NaN	NaN	NaN	NaN	NaN	NaN	NaN	NaN	NaN	NaN	NaN	NaN	NaN	NaN	NaN	NaN	NaN	NaN	NaN	NaN
NaN	NaN	NaN	NaN	NaN	NaN	NaN	NaN	NaN	NaN	NaN	NaN	NaN	NaN	NaN	NaN	NaN	NaN	NaN	NaN	NaN	NaN	NaN	NaN	NaN	NaN	NaN	NaN	NaN	NaN	NaN	NaN	NaN	NaN	NaN	NaN	NaN	NaN	NaN	NaN	NaN	NaN	NaN	NaN	NaN	NaN	NaN	NaN	NaN	NaN
NaN	NaN	NaN	NaN	NaN	NaN	NaN	NaN	NaN	NaN	NaN	NaN	NaN	NaN	NaN	NaN	NaN	NaN	NaN	NaN	NaN	NaN	NaN	NaN	NaN	NaN	NaN	NaN	NaN	NaN	NaN	NaN	NaN	NaN	NaN	NaN	NaN	NaN	NaN	NaN	NaN	NaN	NaN	NaN	NaN	NaN	NaN	NaN	NaN	NaN
NaN	NaN	NaN	NaN	NaN	NaN	NaN	NaN	NaN	NaN	NaN	NaN	NaN	NaN	NaN	NaN	NaN	NaN	NaN	NaN	NaN	NaN	NaN	NaN	NaN	NaN	NaN	NaN	NaN	NaN	NaN	NaN	NaN	NaN	NaN	NaN	NaN	NaN	NaN	NaN	NaN	NaN	NaN	NaN	NaN	NaN	NaN	NaN	NaN	NaN
NaN	NaN	NaN	NaN	NaN	NaN	NaN	NaN	NaN	NaN	NaN	NaN	NaN	NaN	NaN	NaN	NaN	NaN	NaN	NaN	NaN	NaN	NaN	NaN	NaN	NaN	NaN	NaN	NaN	NaN	NaN	NaN	NaN	NaN	NaN	NaN	NaN	NaN	NaN	NaN	NaN	NaN	NaN	NaN	NaN	NaN	NaN	NaN	NaN	NaN
NaN	NaN	NaN	NaN	NaN	NaN	NaN	NaN	NaN	NaN	NaN	NaN	NaN	NaN	NaN	NaN	NaN	NaN	NaN	NaN	NaN	NaN	NaN	NaN	NaN	NaN	NaN	NaN	NaN	NaN	NaN	NaN	NaN	NaN	NaN	NaN	NaN	NaN	NaN	NaN	NaN	NaN	NaN	NaN	NaN	NaN	NaN	NaN	NaN	NaN
[truncated: 111 more columns]

## Sheet: fig2.b
R		h=19d	h=27d	h=37d	h=47d	h=57d		H=4d	H=7d	H=10d	H=13d
1		6.05906	5.80867	5.75619	5.98	5.78633		6.07086	5.61732	5.71848	5.53889
2		6.16873	6.08181	5.69745	6.29094	5.88967		5.81684	5.86052	5.8859	5.83585
3		6.14093	6.00553	5.83716	6.31023	5.99141		6.03285	5.93921	5.7684	5.87614
4		5.86505	5.93152	5.71207	6.19948	6.04613		5.86662	5.82268	5.65736	5.76798
5		5.87238	5.99517	5.61169	6.10573	6.12467		5.92121	5.67774	5.59604	5.60591
6		5.7044	5.73316	5.5984	6.07839	6.01586		5.91059	5.59957	5.46536	5.55207
7		5.67757	5.69446	5.43822	5.92135	5.9496		5.75514	5.52504	5.388	5.46625
8		5.56161	5.61515	5.30454	5.82153	5.84859		5.64154	5.43291	5.22924	5.33592
9		5.39612	5.4943	5.24825	5.54218	5.69224		5.53101	5.3871	5.1241	5.22891
10		5.35568	5.33823	5.14342	5.47012	5.59293		5.41919	5.15957	5.04325	4.98955
11		5.16301	5.29373	5.02754	5.42261	5.4476		5.37903	5.13103	4.98444	4.70791
12		5.21354	5.18279	4.93174	5.31535	5.35672		5.23296	5.0784	4.8956	4.51555
13		5.13845	5.13813	4.77232	5.18028	5.21624		5.04052	4.9889	4.81385	4.25348
14		5.11232	5.10426	4.72589	5.12932	5.1307		5.03363	4.99778	4.79376	NaN
15		5.10906	5.0427	4.77197	5.0443	5.0843		5.08137	5.00682	4.81666	NaN
16		5.065	4.98176	4.75456	5.04085	5.03972		5.07768	4.9848	4.68494	NaN
17		4.90079	4.96378	4.69778	5.02814	5.0495		5.01464	4.92509	4.63146	NaN
18		4.91166	4.95498	4.63502	5.02456	4.97179		5.01733	4.83044	4.35656	NaN
19		4.92796	4.8787	4.6249	4.98102	5.01542		4.98142	4.83323	4.27746	NaN
20		4.84749	4.92403	4.65953	4.95436	4.91044		4.99252	4.87389	NaN	NaN
21		4.85671	4.87387	4.61682	4.92164	5.01541		4.93026	4.87751	NaN	NaN
22		4.80084	4.76875	4.65515	4.98912	5.07134		5.03797	4.78252	NaN	NaN
23		4.77616	4.81425	4.62449	4.94506	5.05558		4.99727	4.62305	NaN	NaN
24		4.73846	4.78933	4.63155	4.90388	5.11403		4.99173	4.39038	NaN	NaN
25		NaN	4.57673	4.52014	4.89568	5.05285		4.95577	4.25581	NaN	NaN
26		NaN	NaN	4.44534	4.85252	4.92465		4.91946	NaN	NaN	NaN
27		NaN	NaN	4.42186	4.73413	4.89809		4.98413	NaN	NaN	NaN
28		NaN	NaN	NaN	4.65099	4.68048		4.91991	NaN	NaN	NaN
29		NaN	NaN	NaN	4.76025	4.88818		4.97563	NaN	NaN	NaN
30		NaN	NaN	NaN	4.46834	4.68016		4.77651	NaN	NaN	NaN
31		NaN	NaN	NaN	NaN	NaN		4.24024	NaN	NaN	NaN
32		NaN	NaN	NaN	NaN	NaN		NaN	NaN	NaN	NaN
33		NaN	NaN	NaN	NaN	NaN		NaN	NaN	NaN	NaN
34		NaN	NaN	NaN	NaN	NaN		NaN	NaN	NaN	NaN
35		NaN	NaN	NaN	NaN	NaN		NaN	NaN	NaN	NaN

## Sheet: fig2.c
phi_a	z_a		phi_b	z_b		phi_tap	z_tap
0.630459	5.7495		0.599737	4.876		0.622627	5.35898
0.633884	5.76617		0.601882	4.90045		0.619281	5.29487
0.638723	5.85554		0.608422	5.09602		0.612369	5.23766
0.64265	5.97526		0.610374	5.13524		0.612006	5.2499
0.641368	5.93385		0.611712	5.18985		0.625417	5.39226
						0.605094	5.30837
						0.608999	5.27127
						0.635462	5.7421
						0.631129	5.5147

## Sheet: fig3.a
phi_a	fab_a		phi_b	fab_b		phi_tap	fab_tap
0.630459	0.0723343		0.599737	0.0575111		0.622627	0.00800375
0.633884	0.0735116		0.601882	0.059948		0.619281	0.0216164
0.638723	0.0790235		0.608422	0.0607776		0.612369	0.0260931
0.64265	0.0734874		0.610374	0.0586565		0.612006	0.0255485
0.641368	0.0810407		0.611712	0.0560286		0.625417	0.0167022
						0.605094	0.0348688
						0.608999	0.0285347
						0.635462	0.0189506
						0.631129	0.0213093

## Sheet: fig3.b
phi	A	B	tap1	tap2
3.63636	1.31557	1.11469	1.21479	0.68869
5.45455	1.29701	1.10511	1.13062	0.712446
7.27273	1.27499	1.09553	1.04936	0.736274
9.09091	1.23934	1.07999	1.06486	0.761309
10.9091	1.20701	1.07474	1.0645	0.784547
12.7273	1.18352	1.0749	1.07525	0.78803
14.5455	1.16285	1.07528	1.06942	0.804566
16.3636	1.1413	1.0762	1.05319	0.817292
18.1818	1.12974	1.07644	1.0393	0.825193
20	1.12677	1.07501	1.03974	0.841638
21.8182	1.12549	1.06942	1.05744	0.888634
23.6364	1.12489	1.06121	1.0667	0.921758
25.4545	1.12516	1.05157	1.06009	0.951016
27.2727	1.12471	1.04401	1.05778	0.965896
29.0909	1.13091	1.03967	1.05731	0.974546
30.9091	1.13654	1.03765	1.05797	0.966431
32.7273	1.14256	1.03759	1.05019	0.965442
34.5455	1.15527	1.03856	1.05169	0.978578
36.3636	1.16859	1.03911	1.06143	1.00034
38.1818	1.16961	1.03819	1.06722	1.01924
40	1.16827	1.03554	1.07414	1.02891
41.8182	1.16504	1.03185	1.08741	1.03862
43.6364	1.15974	1.02782	1.08553	1.02523
45.4545	1.15124	1.02384	1.07676	1.02167
47.2727	1.1403	1.01856	1.07795	1.02873
49.0909	1.12866	1.01156	1.09162	1.02944
50.9091	1.11855	1.00374	1.09897	1.02278
52.7273	1.10983	0.99818	1.09129	1.03311
54.5455	1.09948	0.995434	1.0776	1.0427
56.3636	1.0845	0.994582	1.07094	1.02547
58.1818	1.06485	0.994335	1.072	1.01456
60	1.04086	0.994063	1.06655	1.02136
61.8182	1.01274	0.992695	1.05412	1.01787
63.6364	0.980463	0.989526	1.03798	1.01299
65.4545	0.946541	0.985577	1.02031	1.00943
67.2727	0.911924	0.982782	1.00111	1.01602
69.0909	0.878188	0.981285	0.983521	1.02546
70.9091	0.84974	0.979615	0.966585	1.02886
72.7273	0.827947	0.977022	0.949415	1.02714
74.5455	0.812232	0.973775	0.93397	1.01741
76.3636	0.796443	0.961854	0.917253	1.01618
78.1818	0.778394	0.94977	0.900872	1.00948
80	0.760539	0.930842	0.877872	1.02127
81.8182	0.748226	0.914052	0.865636	1.02176
83.6364	0.740424	0.90002	0.854044	1.0182
85.4545	0.73049	0.891512	0.847179	1.00852
87.2727	0.72013	0.886259	0.836321	1.01506
89.0909	0.736078	0.885077	0.828988	1.01506
90.9091	0.747792	0.886204	0.822034	1.01099
92.7273	0.759341	0.889212	0.823609	1.01004
94.5455	0.770587	0.893992	0.83428	1.01505
96.3636	0.795159	0.900727	0.842129	1.01235
98.1818	0.819426	0.91047	0.851772	1.00821
100	0.839074	0.923159	0.859841	1.02053
101.818	0.858563	0.939596	0.873115	1.02807
103.636	0.878822	0.957847	0.888294	1.02339
105.455	0.900122	0.977784	0.91588	1.01599
107.273	0.922825	0.98189	0.940524	1.02225
109.091	0.94682	1.00301	0.958386	1.01942
110.909	0.969548	1.00567	0.967585	1.02782
112.727	0.989173	1.00566	0.98966	1.03483
114.545	1.00648	1.00521	1.01192	1.03153
116.364	1.02507	1.00451	1.03135	1.01789
118.182	1.04964	1.00561	1.04347	1.00899
120	1.0756	1.00839	1.05399	1.01397
121.818	1.08453	1.01092	1.06596	1.01596
123.636	1.10017	1.0126	1.07662	1.01885
125.455	1.11301	1.01433	1.08301	1.01186
127.273	1.12548	1.01633	1.09047	1.02507
129.091	1.13931	1.01826	1.09243	1.03334
130.909	1.14913	1.02722	1.09749	1.02224
132.727	1.16876	1.03423	1.10436	1.01604
134.545	1.18759	1.04219	1.09372	1.02736
136.364	1.20181	1.05247	1.08377	1.02478
138.182	1.21698	1.06216	1.07832	1.01574
140	1.23222	1.07147	1.08853	1.01601
141.818	1.22395	1.081	1.08716	1.03005
143.636	1.21909	1.0895	1.07941	1.02263
145.455	1.21442	1.09515	1.07532	1.0098
147.273	1.2111	1.09807	1.07076	0.98786
149.091	1.19236	1.09834	1.05392	0.970015
150.909	1.17369	1.09877	1.04599	0.962773
152.727	1.15891	1.10095	1.04497	0.960567
154.545	1.14337	1.1051	1.04157	0.96142
156.364	1.1277	1.10956	1.04305	0.953316
158.182	1.11635	1.11438	1.04986	0.939965
160	1.10922	1.11942	1.06012	0.907695
161.818	1.11106	1.12165	1.04952	0.864077
163.636	1.11491	1.12391	1.03922	0.815593
165.455	1.12658	1.12686	1.03219	0.795712
167.273	1.13905	1.12518	1.04653	0.789077
169.091	1.17794	1.1243	1.06306	0.787788
170.909	1.22544	1.1265	1.04075	0.770417
172.727	1.2687	1.1313	1.00581	0.777519
174.545	1.31069	1.1382	1.01256	0.762342
176.364	1.35273	1.14713	1.04743	0.742089
		1.15788	1.13251	0.716681
		1.16875	1.22012	0.691004

## Sheet: fig3.c
-6.12323e-17	-0.0317279	-0.0634239	-0.095056	-0.126592	-0.158001	-0.189251	-0.220311	-0.251148	-0.281733	-0.312033	-0.34202	-0.371662	-0.400931	-0.429795	-0.458227	-0.486197	-0.513677	-0.540641	-0.56706	-0.592908	-0.618159	-0.642788	-0.666769	-0.690079	-0.712694	-0.734592	-0.75575	-0.776146	-0.795762	-0.814576	-0.83257	-0.849725	-0.866025	-0.881453	-0.895994	-0.909632	-0.922354	-0.934148	-0.945001	-0.954902	-0.963842	-0.971812	-0.978802	-0.984808	-0.989821	-0.993838	-0.996855	-0.998867	-0.999874
-6.12018e-17	-0.0317121	-0.0633923	-0.0950087	-0.126529	-0.157923	-0.189157	-0.220201	-0.251023	-0.281592	-0.311878	-0.34185	-0.371477	-0.400731	-0.429581	-0.457998	-0.485954	-0.513421	-0.540371	-0.566777	-0.592612	-0.617851	-0.642467	-0.666437	-0.689735	-0.712339	-0.734226	-0.755373	-0.77576	-0.795365	-0.81417	-0.832155	-0.849302	-0.865594	-0.881014	-0.895547	-0.909179	-0.921895	-0.933682	-0.94453	-0.954426	-0.963362	-0.971327	-0.978315	-0.984317	-0.989328	-0.993343	-0.996358	-0.998369	-0.999376
-6.11103e-17	-0.0316647	-0.0632975	-0.0948666	-0.12634	-0.157686	-0.188874	-0.219871	-0.250647	-0.281171	-0.311412	-0.341338	-0.370922	-0.400131	-0.428938	-0.457313	-0.485228	-0.512654	-0.539563	-0.56593	-0.591726	-0.616927	-0.641506	-0.66544	-0.688704	-0.711274	-0.733128	-0.754243	-0.774599	-0.794176	-0.812952	-0.83091	-0.848032	-0.864299	-0.879696	-0.894208	-0.907819	-0.920516	-0.932286	-0.943117	-0.952999	-0.961921	-0.969875	-0.976852	-0.982845	-0.987849	-0.991858	-0.994868	-0.996876	-0.997881
-6.09579e-17	-0.0315857	-0.0631396	-0.0946299	-0.126025	-0.157293	-0.188403	-0.219323	-0.250022	-0.28047	-0.310635	-0.340487	-0.369996	-0.399133	-0.427868	-0.456172	-0.484017	-0.511375	-0.538217	-0.564518	-0.59025	-0.615388	-0.639906	-0.66378	-0.686986	-0.709499	-0.731299	-0.752362	-0.772667	-0.792195	-0.810924	-0.828838	-0.845916	-0.862143	-0.877502	-0.891977	-0.905554	-0.91822	-0.92996	-0.940765	-0.950622	-0.959522	-0.967455	-0.974415	-0.980393	-0.985384	-0.989383	-0.992386	-0.99439	-0.995392
-6.07446e-17	-0.0314752	-0.0629188	-0.094299	-0.125584	-0.156743	-0.187744	-0.218556	-0.249148	-0.279489	-0.309548	-0.339296	-0.368702	-0.397737	-0.426372	-0.454577	-0.482324	-0.509586	-0.536335	-0.562543	-0.588186	-0.613236	-0.637668	-0.661458	-0.684583	-0.707018	-0.728741	-0.74973	-0.769965	-0.789424	-0.808088	-0.825939	-0.842958	-0.859128	-0.874433	-0.888858	-0.902387	-0.915008	-0.926708	-0.937474	-0.947297	-0.956166	-0.964071	-0.971007	-0.976964	-0.981938	-0.985923	-0.988915	-0.990912	-0.99191
-6.04709e-17	-0.0313334	-0.0626352	-0.093874	-0.125018	-0.156037	-0.186898	-0.217571	-0.248025	-0.278229	-0.308153	-0.337767	-0.367041	-0.395945	-0.42445	-0.452528	-0.480151	-0.50729	-0.533918	-0.560008	-0.585535	-0.610472	-0.634794	-0.658477	-0.681498	-0.703832	-0.725457	-0.746351	-0.766495	-0.785866	-0.804446	-0.822216	-0.839159	-0.855256	-0.870492	-0.884852	-0.89832	-0.910884	-0.922531	-0.933249	-0.943028	-0.951856	-0.959727	-0.966631	-0.972561	-0.977513	-0.98148	-0.984458	-0.986446	-0.98744
-6.01369e-17	-0.0311603	-0.0622892	-0.0933554	-0.124328	-0.155175	-0.185865	-0.216369	-0.246655	-0.276692	-0.306451	-0.335901	-0.365013	-0.393758	-0.422106	-0.450029	-0.477498	-0.504487	-0.530968	-0.556915	-0.5823	-0.6071	-0.631288	-0.65484	-0.677733	-0.699944	-0.721449	-0.742229	-0.762261	-0.781525	-0.800003	-0.817675	-0.834523	-0.850532	-0.865684	-0.879964	-0.893358	-0.905853	-0.917435	-0.928094	-0.937818	-0.946598	-0.954425	-0.961291	-0.967189	-0.972113	-0.976058	-0.97902	-0.980997	-0.981986
-5.97429e-17	-0.0309562	-0.0618811	-0.0927438	-0.123513	-0.154158	-0.184648	-0.214952	-0.245039	-0.274879	-0.304443	-0.333701	-0.362622	-0.391178	-0.41934	-0.44708	-0.47437	-0.501182	-0.52749	-0.553266	-0.578486	-0.603122	-0.627152	-0.65055	-0.673293	-0.695358	-0.716723	-0.737366	-0.757267	-0.776405	-0.794761	-0.812318	-0.829056	-0.844959	-0.860012	-0.874199	-0.887505	-0.899918	-0.911425	-0.922014	-0.931674	-0.940397	-0.948172	-0.954993	-0.960852	-0.965744	-0.969663	-0.972606	-0.97457	-0.975552
-5.92893e-17	-0.0307212	-0.0614114	-0.0920398	-0.122575	-0.152988	-0.183246	-0.21332	-0.243179	-0.272793	-0.302132	-0.331167	-0.359869	-0.388208	-0.416157	-0.443686	-0.470769	-0.497378	-0.523485	-0.549066	-0.574094	-0.598544	-0.622391	-0.645611	-0.668182	-0.690079	-0.711282	-0.731768	-0.751518	-0.770511	-0.788728	-0.806151	-0.822762	-0.838545	-0.853483	-0.867562	-0.880768	-0.893086	-0.904506	-0.915014	-0.924602	-0.933258	-0.940974	-0.947743	-0.953558	-0.958413	-0.962302	-0.965223	-0.967172	-0.968146
-5.87767e-17	-0.0304555	-0.0608804	-0.0912439	-0.121516	-0.151665	-0.181662	-0.211475	-0.241076	-0.270434	-0.29952	-0.328304	-0.356757	-0.384852	-0.412559	-0.43985	-0.466698	-0.493077	-0.518959	-0.544319	-0.56913	-0.593369	-0.617009	-0.640029	-0.662404	-0.684113	-0.705132	-0.725441	-0.74502	-0.763849	-0.781908	-0.799181	-0.815648	-0.831295	-0.846104	-0.860061	-0.873152	-0.885364	-0.896685	-0.907103	-0.916607	-0.925189	-0.932838	-0.939549	-0.945313	-0.950126	-0.953982	-0.956877	-0.958809	-0.959775
-5.82055e-17	-0.0301595	-0.0602887	-0.0903572	-0.120335	-0.150191	-0.179896	-0.20942	-0.238733	-0.267806	-0.296609	-0.325113	-0.35329	-0.381112	-0.408549	-0.435575	-0.462163	-0.488285	-0.513916	-0.539029	-0.563599	-0.587602	-0.611013	-0.633809	-0.655967	-0.677464	-0.698279	-0.718391	-0.73778	-0.756425	-0.774309	-0.791414	-0.807721	-0.823216	-0.837881	-0.851703	-0.864667	-0.87676	-0.887971	-0.898287	-0.907699	-0.916197	-0.923772	-0.930418	-0.936126	-0.940892	-0.944711	-0.947578	-0.949491	-0.950448
-5.75762e-17	-0.0298335	-0.0596369	-0.0893804	-0.119034	-0.148567	-0.177951	-0.207156	-0.236152	-0.264911	-0.293402	-0.321599	-0.349471	-0.376991	-0.404132	-0.430866	-0.457166	-0.483006	-0.50836	-0.533201	-0.557506	-0.581249	-0.604407	-0.626957	-0.648875	-0.67014	-0.69073	-0.710625	-0.729804	-0.748248	-0.765939	-0.782858	-0.798989	-0.814316	-0.828823	-0.842495	-0.855319	-0.867282	-0.878371	-0.888576	-0.897886	-0.906292	-0.913786	-0.920359	-0.926006	-0.93072	-0.934497	-0.937334	-0.939226	-0.940173
-5.68896e-17	-0.0294777	-0.0589257	-0.0883144	-0.117614	-0.146796	-0.175829	-0.204686	-0.233336	-0.261751	-0.289903	-0.317763	-0.345303	-0.372496	-0.399313	-0.425728	-0.451714	-0.477246	-0.502297	-0.526843	-0.550857	-0.574318	-0.597199	-0.61948	-0.641137	-0.662148	-0.682493	-0.70215	-0.7211	-0.739324	-0.756804	-0.773522	-0.789461	-0.804605	-0.818938	-0.832448	-0.845119	-0.856939	-0.867896	-0.877979	-0.887178	-0.895484	-0.902888	-0.909383	-0.914963	-0.919621	-0.923353	-0.926155	-0.928025	-0.92896
-5.61462e-17	-0.0290925	-0.0581558	-0.0871605	-0.116077	-0.144877	-0.173532	-0.202011	-0.230287	-0.258331	-0.286115	-0.313611	-0.340791	-0.367628	-0.394095	-0.420165	-0.445812	-0.47101	-0.495734	-0.519959	-0.54366	-0.566813	-0.589396	-0.611386	-0.632759	-0.653496	-0.673575	-0.692975	-0.711678	-0.729664	-0.746915	-0.763415	-0.779145	-0.794091	-0.808238	-0.82157	-0.834076	-0.845741	-0.856555	-0.866507	-0.875586	-0.883783	-0.891091	-0.897501	-0.903007	-0.907605	-0.911288	-0.914054	-0.915899	-0.916822
-5.53469e-17	-0.0286784	-0.0573279	-0.0859196	-0.114425	-0.142815	-0.171061	-0.199135	-0.227009	-0.254653	-0.282042	-0.309146	-0.33594	-0.362395	-0.388485	-0.414184	-0.439465	-0.464305	-0.488676	-0.512556	-0.53592	-0.558744	-0.581005	-0.602682	-0.623751	-0.644193	-0.663986	-0.68311	-0.701546	-0.719276	-0.736282	-0.752546	-0.768053	-0.782786	-0.796731	-0.809874	-0.822202	-0.833701	-0.844361	-0.854171	-0.863121	-0.871201	-0.878405	-0.884724	-0.890152	-0.894684	-0.898314	-0.901041	-0.90286	-0.90377
-5.44924e-17	-0.0282356	-0.0564428	-0.0845931	-0.112658	-0.14061	-0.16842	-0.196061	-0.223504	-0.250722	-0.277688	-0.304374	-0.330753	-0.3568	-0.382487	-0.407789	-0.432681	-0.457136	-0.481132	-0.504643	-0.527646	-0.550118	-0.572035	-0.593377	-0.614121	-0.634247	-0.653734	-0.672563	-0.690715	-0.708172	-0.724915	-0.740928	-0.756195	-0.770701	-0.784431	-0.797371	-0.809508	-0.82083	-0.831325	-0.840984	-0.849795	-0.857751	-0.864843	-0.871065	-0.876409	-0.880871	-0.884446	-0.88713	-0.888921	-0.889817
-5.35836e-17	-0.0277647	-0.0555014	-0.0831823	-0.110779	-0.138265	-0.165611	-0.192791	-0.219776	-0.246541	-0.273056	-0.299297	-0.325237	-0.350849	-0.376108	-0.400988	-0.425464	-0.449512	-0.473108	-0.496227	-0.518846	-0.540943	-0.562495	-0.583481	-0.603879	-0.623669	-0.642832	-0.661347	-0.679196	-0.696361	-0.712825	-0.728571	-0.743584	-0.757848	-0.771348	-0.784073	-0.796007	-0.80714	-0.817461	-0.826958	-0.835623	-0.843446	-0.85042	-0.856537	-0.861792	-0.86618	-0.869695	-0.872335	-0.874096	-0.874977
-5.26214e-17	-0.0272661	-0.0545048	-0.0816886	-0.10879	-0.135782	-0.162637	-0.189329	-0.21583	-0.242113	-0.268153	-0.293923	-0.319397	-0.344549	-0.369354	-0.393787	-0.417824	-0.44144	-0.464612	-0.487316	-0.509529	-0.531229	-0.552394	-0.573003	-0.593035	-0.61247	-0.631288	-0.649471	-0.666999	-0.683856	-0.700024	-0.715488	-0.730231	-0.744239	-0.757497	-0.769993	-0.781713	-0.792646	-0.802781	-0.812108	-0.820617	-0.8283	-0.835148	-0.841156	-0.846317	-0.850626	-0.854078	-0.85667	-0.858399	-0.859265
-5.16067e-17	-0.0267404	-0.0534538	-0.0801134	-0.106692	-0.133164	-0.159501	-0.185678	-0.211668	-0.237445	-0.262982	-0.288255	-0.313238	-0.337905	-0.362232	-0.386194	-0.409768	-0.432928	-0.455653	-0.477919	-0.499704	-0.520986	-0.541743	-0.561954	-0.5816	-0.60066	-0.619115	-0.636947	-0.654138	-0.67067	-0.686526	-0.701691	-0.71615	-0.729888	-0.742891	-0.755145	-0.76664	-0.777362	-0.787302	-0.796448	-0.804793	-0.812328	-0.819045	-0.824937	-0.829998	-0.834223	-0.837609	-0.840151	-0.841847	-0.842696
-5.05406e-17	-0.0261879	-0.0523495	-0.0784584	-0.104488	-0.130413	-0.156206	-0.181842	-0.207295	-0.232539	-0.25755	-0.2823	-0.306767	-0.330924	-0.354749	-0.378216	-0.401302	-0.423985	-0.44624	-0.468046	-0.489381	-0.510223	-0.530551	-0.550345	-0.569585	-0.588251	-0.606325	-0.623789	-0.640624	-0.656815	-0.672344	-0.687196	-0.701356	-0.714809	-0.727544	-0.739545	-0.750802	-0.761303	-0.771037	-0.779995	-0.788168	-0.795547	-0.802124	-0.807895	-0.812851	-0.81699	-0.820305	-0.822795	-0.824456	-0.825287
-4.94241e-17	-0.0256094	-0.0511931	-0.0767252	-0.10218	-0.127532	-0.152755	-0.177825	-0.202716	-0.227402	-0.25186	-0.276064	-0.29999	-0.323614	-0.346912	-0.369861	-0.392437	-0.414618	-0.436382	-0.457706	-0.47857	-0.498951	-0.518831	-0.538187	-0.557002	-0.575256	-0.592931	-0.610009	-0.626472	-0.642305	-0.657491	-0.672015	-0.685862	-0.699019	-0.711471	-0.723208	-0.734216	-0.744485	-0.754004	-0.762764	-0.770756	-0.777972	-0.784405	-0.790047	-0.794895	-0.798941	-0.802184	-0.804618	-0.806243	-0.807056
-4.82584e-17	-0.0250054	-0.0499856	-0.0749154	-0.0997699	-0.124524	-0.149152	-0.173631	-0.197934	-0.222039	-0.245919	-0.269552	-0.292914	-0.315981	-0.338729	-0.361137	-0.383181	-0.404839	-0.426089	-0.446911	-0.467282	-0.487183	-0.506593	-0.525493	-0.543864	-0.561688	-0.578945	-0.59562	-0.611696	-0.627155	-0.641983	-0.656164	-0.669685	-0.682531	-0.69469	-0.706149	-0.716898	-0.726925	-0.736219	-0.744773	-0.752576	-0.759622	-0.765903	-0.771413	-0.776145	-0.780097	-0.783263	-0.78564	-0.787226	-0.78802
-4.70445e-17	-0.0243764	-0.0487283	-0.0730311	-0.0972603	-0.121392	-0.145401	-0.169263	-0.192956	-0.216454	-0.239734	-0.262772	-0.285546	-0.308033	-0.330209	-0.352053	-0.373542	-0.394656	-0.415372	-0.435669	-0.455528	-0.474928	-0.49385	-0.512275	-0.530184	-0.547559	-0.564383	-0.580638	-0.596309	-0.61138	-0.625834	-0.639659	-0.65284	-0.665363	-0.677216	-0.688387	-0.698865	-0.70864	-0.717701	-0.726039	-0.733646	-0.740515	-0.746638	-0.752009	-0.756623	-0.760475	-0.763561	-0.765878	-0.767425	-0.768198
-4.57837e-17	-0.0237231	-0.0474224	-0.0710739	-0.0946538	-0.118138	-0.141504	-0.164727	-0.187785	-0.210653	-0.233309	-0.25573	-0.277894	-0.299778	-0.32136	-0.342618	-0.363532	-0.384079	-0.40424	-0.423993	-0.44332	-0.462201	-0.480615	-0.498546	-0.515975	-0.532885	-0.549258	-0.565078	-0.580329	-0.594995	-0.609062	-0.622517	-0.635344	-0.647531	-0.659067	-0.669939	-0.680136	-0.689649	-0.698467	-0.706582	-0.713985	-0.72067	-0.726628	-0.731855	-0.736346	-0.740094	-0.743098	-0.745353	-0.746858	-0.747611
-4.44773e-17	-0.0230462	-0.0460692	-0.0690458	-0.0919529	-0.114767	-0.137466	-0.160027	-0.182426	-0.204642	-0.226652	-0.248433	-0.269964	-0.291224	-0.31219	-0.332842	-0.353159	-0.37312	-0.392705	-0.411895	-0.43067	-0.449012	-0.466901	-0.484321	-0.501253	-0.517679	-0.533585	-0.548954	-0.563769	-0.578017	-0.591683	-0.604754	-0.617215	-0.629055	-0.640261	-0.650823	-0.660729	-0.66997	-0.678537	-0.68642	-0.693612	-0.700106	-0.705895	-0.710972	-0.715335	-0.718976	-0.721894	-0.724085	-0.725547	-0.726278
-4.31266e-17	-0.0223463	-0.0446701	-0.066949	-0.0891604	-0.111282	-0.133292	-0.155167	-0.176886	-0.198427	-0.219768	-0.240888	-0.261766	-0.28238	-0.302709	-0.322734	-0.342433	-0.361788	-0.380779	-0.399386	-0.417591	-0.435376	-0.452722	-0.469612	-0.48603	-0.501958	-0.517381	-0.532282	-0.546648	-0.560463	-0.573714	-0.586388	-0.598471	-0.609951	-0.620817	-0.631058	-0.640663	-0.649624	-0.65793	-0.665574	-0.672548	-0.678844	-0.684457	-0.689381	-0.69361	-0.697142	-0.699971	-0.702095	-0.703513	-0.704222
-4.17329e-17	-0.0216241	-0.0432265	-0.0647854	-0.086279	-0.107686	-0.128984	-0.150152	-0.17117	-0.192015	-0.212666	-0.233104	-0.253306	-0.273254	-0.292926	-0.312304	-0.331367	-0.350096	-0.368473	-0.386479	-0.404096	-0.421306	-0.438091	-0.454436	-0.470323	-0.485736	-0.50066	-0.515081	-0.528982	-0.542351	-0.555174	-0.567437	-0.57913	-0.590239	-0.600754	-0.610664	-0.619959	-0.62863	-0.636668	-0.644065	-0.650813	-0.656906	-0.662337	-0.667102	-0.671195	-0.674612	-0.67735	-0.679406	-0.680777	-0.681463
-4.02975e-17	-0.0208804	-0.0417398	-0.0625572	-0.0833116	-0.103982	-0.124548	-0.144988	-0.165283	-0.185411	-0.205352	-0.225086	-0.244594	-0.263856	-0.282852	-0.301563	-0.31997	-0.338055	-0.3558	-0.373187	-0.390198	-0.406816	-0.423024	-0.438806	-0.454147	-0.46903	-0.483441	-0.497365	-0.510789	-0.523698	-0.536079	-0.547921	-0.559212	-0.569939	-0.580092	-0.589661	-0.598637	-0.607009	-0.614771	-0.621913	-0.628429	-0.634313	-0.639557	-0.644158	-0.64811	-0.65141	-0.654054	-0.656039	-0.657363	-0.658026
-3.8822e-17	-0.0201159	-0.0402115	-0.0602667	-0.0802611	-0.100175	-0.119988	-0.139679	-0.159231	-0.178622	-0.197833	-0.216845	-0.235638	-0.254195	-0.272495	-0.290521	-0.308254	-0.325678	-0.342773	-0.359523	-0.375911	-0.39192	-0.407535	-0.422739	-0.437518	-0.451857	-0.46574	-0.479154	-0.492086	-0.504522	-0.516451	-0.527859	-0.538736	-0.54907	-0.558852	-0.568071	-0.576717	-0.584784	-0.592261	-0.599142	-0.605419	-0.611087	-0.61614	-0.620572	-0.62438	-0.627559	-0.630105	-0.632018	-0.633294	-0.633932
-3.73078e-17	-0.0193313	-0.0386431	-0.057916	-0.0771306	-0.0962676	-0.115308	-0.134231	-0.15302	-0.171655	-0.190117	-0.208387	-0.226448	-0.24428	-0.261867	-0.27919	-0.296231	-0.312975	-0.329403	-0.3455	-0.361249	-0.376634	-0.39164	-0.406251	-0.420454	-0.434233	-0.447574	-0.460465	-0.472893	-0.484844	-0.496307	-0.507271	-0.517723	-0.527655	-0.537055	-0.545914	-0.554223	-0.561975	-0.569161	-0.575773	-0.581806	-0.587253	-0.592108	-0.596368	-0.600027	-0.603082	-0.605529	-0.607367	-0.608593	-0.609206
-3.57564e-17	-0.0185274	-0.0370362	-0.0555077	-0.0739233	-0.0922645	-0.110513	-0.12865	-0.146657	-0.164517	-0.182211	-0.199722	-0.217031	-0.234122	-0.250977	-0.26758	-0.283913	-0.29996	-0.315706	-0.331133	-0.346227	-0.360972	-0.375354	-0.389358	-0.40297	-0.416176	-0.428963	-0.441318	-0.453228	-0.464683	-0.475669	-0.486177	-0.496195	-0.505713	-0.514722	-0.523213	-0.531177	-0.538606	-0.545493	-0.551831	-0.557612	-0.562833	-0.567487	-0.571569	-0.575076	-0.578003	-0.580349	-0.58211	-0.583286	-0.583874
-3.41694e-17	-0.0177051	-0.0353924	-0.053044	-0.0706423	-0.0881694	-0.105608	-0.12294	-0.140148	-0.157215	-0.174124	-0.190857	-0.207398	-0.223731	-0.239838	-0.255704	-0.271312	-0.286647	-0.301693	-0.316436	-0.33086	-0.344951	-0.358694	-0.372076	-0.385084	-0.397704	-0.409923	-0.42173	-0.433112	-0.444058	-0.454557	-0.464598	-0.474171	-0.483267	-0.491877	-0.49999	-0.507601	-0.5147	-0.521282	-0.527338	-0.532863	-0.537852	-0.542299	-0.5462	-0.549551	-0.552349	-0.554591	-0.556274	-0.557397	-0.557959
-3.25483e-17	-0.0168651	-0.0337133	-0.0505275	-0.0672908	-0.0839864	-0.100597	-0.117107	-0.133499	-0.149756	-0.165863	-0.181802	-0.197559	-0.213116	-0.228459	-0.243572	-0.25844	-0.273048	-0.28738	-0.301423	-0.315163	-0.328585	-0.341677	-0.354424	-0.366815	-0.378836	-0.390476	-0.401722	-0.412564	-0.422991	-0.432992	-0.442556	-0.451675	-0.46034	-0.468541	-0.47627	-0.483519	-0.490282	-0.496551	-0.50232	-0.507583	-0.512335	-0.516571	-0.520287	-0.523479	-0.526144	-0.528279	-0.529883	-0.530953	-0.531488
-3.08948e-17	-0.0160083	-0.0320006	-0.0479606	-0.0638723	-0.0797197	-0.0954868	-0.111158	-0.126717	-0.142148	-0.157437	-0.172566	-0.187522	-0.20229	-0.216853	-0.231198	-0.245311	-0.259176	-0.272781	-0.28611	-0.299152	-0.311892	-0.324319	-0.336419	-0.34818	-0.35959	-0.370638	-0.381314	-0.391605	-0.401502	-0.410995	-0.420073	-0.428729	-0.436953	-0.444738	-0.452074	-0.458955	-0.465374	-0.471325	-0.4768	-0.481796	-0.486307	-0.490328	-0.493855	-0.496885	-0.499415	-0.501442	-0.502963	-0.503979	-0.504487
-2.92105e-17	-0.0151356	-0.0302559	-0.0453458	-0.0603901	-0.0753735	-0.090281	-0.105098	-0.119808	-0.134399	-0.148853	-0.163158	-0.177299	-0.191261	-0.205031	-0.218594	-0.231937	-0.245046	-0.257909	-0.270512	-0.282843	-0.294889	-0.306637	-0.318078	-0.329197	-0.339986	-0.350432	-0.360525	-0.370255	-0.379613	-0.388588	-0.397172	-0.405356	-0.413131	-0.420491	-0.427428	-0.433934	-0.440003	-0.445629	-0.450806	-0.45553	-0.459794	-0.463596	-0.466931	-0.469796	-0.472188	-0.474104	-0.475543	-0.476503	-0.476983
-2.7497e-17	-0.0142478	-0.0284812	-0.0426859	-0.0568477	-0.0709522	-0.0849852	-0.0989327	-0.112781	-0.126515	-0.140122	-0.153588	-0.166899	-0.180042	-0.193004	-0.205771	-0.218332	-0.230672	-0.24278	-0.254644	-0.266251	-0.277591	-0.28865	-0.29942	-0.309887	-0.320043	-0.329876	-0.339377	-0.348537	-0.357345	-0.365794	-0.373874	-0.381578	-0.388898	-0.395826	-0.402355	-0.40848	-0.414193	-0.419489	-0.424362	-0.428809	-0.432823	-0.436402	-0.439541	-0.442238	-0.44449	-0.446294	-0.447648	-0.448552	-0.449004
-2.57562e-17	-0.0133457	-0.026678	-0.0399834	-0.0532486	-0.0664601	-0.0796048	-0.0926692	-0.10564	-0.118505	-0.131251	-0.143864	-0.156332	-0.168643	-0.180785	-0.192744	-0.204509	-0.216068	-0.22741	-0.238522	-0.249395	-0.260016	-0.270376	-0.280463	-0.290268	-0.299781	-0.308991	-0.317891	-0.326471	-0.334721	-0.342635	-0.350204	-0.35742	-0.364276	-0.370766	-0.376882	-0.382619	-0.38797	-0.392931	-0.397496	-0.401661	-0.405421	-0.408773	-0.411714	-0.41424	-0.416349	-0.418038	-0.419307	-0.420154	-0.420577
-2.39896e-17	-0.0124304	-0.0248482	-0.0372411	-0.0495964	-0.0619019	-0.0741449	-0.0863133	-0.0983949	-0.110377	-0.122249	-0.133997	-0.14561	-0.157077	-0.168385	-0.179524	-0.190482	-0.201249	-0.211812	-0.222163	-0.23229	-0.242183	-0.251832	-0.261227	-0.270359	-0.27922	-0.287799	-0.296088	-0.304079	-0.311764	-0.319135	-0.326185	-0.332906	-0.339292	-0.345336	-0.351033	-0.356376	-0.36136	-0.365981	-0.370233	-0.374112	-0.377614	-0.380737	-0.383476	-0.385828	-0.387793	-0.389366	-0.390548	-0.391337	-0.391731
-2.21992e-17	-0.0115027	-0.0229937	-0.0344616	-0.0458949	-0.0572819	-0.0686112	-0.0798714	-0.0910512	-0.102139	-0.113125	-0.123996	-0.134743	-0.145353	-0.155818	-0.166126	-0.176266	-0.186229	-0.196004	-0.205582	-0.214953	-0.224107	-0.233036	-0.241731	-0.250181	-0.25838	-0.266319	-0.27399	-0.281384	-0.288496	-0.295317	-0.30184	-0.30806	-0.313969	-0.319562	-0.324834	-0.329778	-0.334391	-0.338666	-0.342601	-0.34619	-0.349432	-0.352321	-0.354855	-0.357032	-0.35885	-0.360306	-0.3614	-0.36213	-0.362495
-2.03866e-17	-0.0105635	-0.0211163	-0.0316478	-0.0421475	-0.0526048	-0.0630091	-0.0733499	-0.0836169	-0.0937997	-0.103888	-0.113872	-0.123741	-0.133485	-0.143095	-0.152561	-0.161874	-0.171023	-0.18	-0.188796	-0.197402	-0.205809	-0.214009	-0.221993	-0.229754	-0.237283	-0.244574	-0.251618	-0.258409	-0.26494	-0.271204	-0.277195	-0.282906	-0.288333	-0.29347	-0.298311	-0.302852	-0.307087	-0.311014	-0.314627	-0.317924	-0.3209	-0.323554	-0.325881	-0.327881	-0.32955	-0.330887	-0.331891	-0.332562	-0.332897
-1.85537e-17	-0.00961373	-0.0192178	-0.0288025	-0.0383582	-0.0478752	-0.0573441	-0.0667552	-0.0760991	-0.0853664	-0.0945478	-0.103634	-0.112616	-0.121484	-0.13023	-0.138845	-0.14732	-0.155647	-0.163817	-0.171822	-0.179654	-0.187305	-0.194768	-0.202034	-0.209098	-0.21595	-0.222585	-0.228996	-0.235176	-0.24112	-0.246821	-0.252273	-0.257471	-0.26241	-0.267085	-0.271491	-0.275623	-0.279478	-0.283052	-0.28634	-0.28934	-0.292049	-0.294464	-0.296582	-0.298402	-0.299921	-0.301138	-0.302052	-0.302662	-0.302967
-1.67023e-17	-0.00865442	-0.0173001	-0.0259284	-0.0345306	-0.043098	-0.051622	-0.060094	-0.0685056	-0.0768481	-0.0851133	-0.0932927	-0.101378	-0.109362	-0.117235	-0.12499	-0.13262	-0.140116	-0.14747	-0.154677	-0.161727	-0.168615	-0.175333	-0.181874	-0.188233	-0.194401	-0.200374	-0.206146	-0.211709	-0.21706	-0.222192	-0.2271	-0.231779	-0.236225	-0.240434	-0.2444	-0.24812	-0.25159	-0.254807	-0.257768	-0.260468	-0.262907	-0.265081	-0.266988	-0.268626	-0.269993	-0.271089	-0.271912	-0.272461	-0.272735
-1.48343e-17	-0.00768648	-0.0153652	-0.0230285	-0.0306686	-0.0382778	-0.0458484	-0.0533729	-0.0608437	-0.0682532	-0.0755939	-0.0828586	-0.0900398	-0.0971303	-0.104123	-0.111011	-0.117787	-0.124445	-0.130977	-0.137377	-0.143639	-0.149757	-0.155723	-0.161533	-0.16718	-0.172659	-0.177964	-0.18309	-0.188031	-0.192783	-0.197341	-0.2017	-0.205856	-0.209805	-0.213543	-0.217065	-0.22037	-0.223452	-0.226309	-0.228938	-0.231337	-0.233503	-0.235433	-0.237127	-0.238582	-0.239796	-0.24077	-0.2415	-0.241988	-0.242232
-1.29515e-17	-0.00671088	-0.013415	-0.0201056	-0.026776	-0.0334194	-0.0400292	-0.0465986	-0.0531212	-0.0595902	-0.0659993	-0.0723418	-0.0786116	-0.0848022	-0.0909074	-0.096921	-0.102837	-0.10865	-0.114353	-0.119941	-0.125408	-0.130749	-0.135958	-0.141031	-0.145961	-0.150744	-0.155376	-0.159851	-0.164165	-0.168314	-0.172294	-0.1761	-0.179728	-0.183176	-0.186439	-0.189515	-0.192399	-0.19509	-0.197585	-0.19988	-0.201975	-0.203866	-0.205551	-0.20703	-0.2083	-0.20936	-0.21021	-0.210848	-0.211274	-0.211487
-1.10557e-17	-0.00572859	-0.0114514	-0.0171627	-0.0228567	-0.0285277	-0.03417	-0.0397779	-0.0453457	-0.0508678	-0.0563388	-0.061753	-0.067105	-0.0723895	-0.077601	-0.0827345	-0.0877846	-0.0927463	-0.0976147	-0.102385	-0.107052	-0.111611	-0.116058	-0.120388	-0.124596	-0.12868	-0.132633	-0.136453	-0.140136	-0.143678	-0.147075	-0.150324	-0.153421	-0.156364	-0.15915	-0.161775	-0.164237	-0.166534	-0.168664	-0.170623	-0.172411	-0.174025	-0.175464	-0.176726	-0.177811	-0.178716	-0.179441	-0.179986	-0.180349	-0.180531
-9.14896e-18	-0.0047406	-0.00947642	-0.0142027	-0.0189147	-0.0236076	-0.0282768	-0.0329175	-0.037525	-0.0420948	-0.0466221	-0.0511026	-0.0555316	-0.0599046	-0.0642173	-0.0684654	-0.0726446	-0.0767506	-0.0807793	-0.0847266	-0.0885887	-0.0923616	-0.0960414	-0.0996246	-0.103107	-0.106486	-0.109758	-0.11292	-0.115967	-0.118898	-0.121709	-0.124398	-0.126961	-0.129396	-0.131701	-0.133874	-0.135912	-0.137813	-0.139575	-0.141196	-0.142676	-0.144011	-0.145202	-0.146247	-0.147144	-0.147893	-0.148493	-0.148944	-0.149245	-0.149395
-7.23309e-18	-0.00374787	-0.00749197	-0.0112285	-0.0149538	-0.018664	-0.0223554	-0.0260242	-0.0296669	-0.0332797	-0.036859	-0.0404012	-0.0439027	-0.04736	-0.0507696	-0.0541281	-0.0574321	-0.0606783	-0.0638633	-0.0669841	-0.0700374	-0.0730202	-0.0759295	-0.0787623	-0.0815158	-0.0841872	-0.0867739	-0.0892731	-0.0916825	-0.0939996	-0.096222	-0.0983475	-0.100374	-0.102299	-0.104122	-0.10584	-0.107451	-0.108953	-0.110346	-0.111628	-0.112798	-0.113854	-0.114796	-0.115621	-0.116331	-0.116923	-0.117397	-0.117754	-0.117991	-0.11811
-5.31e-18	-0.00275141	-0.00550005	-0.00824315	-0.010978	-0.0137017	-0.0164117	-0.0191051	-0.0217793	-0.0244315	-0.0270592	-0.0296596	-0.0322302	-0.0347682	-0.0372713	-0.0397369	-0.0421624	-0.0445455	-0.0468838	-0.0491748	-0.0514163	-0.0536061	-0.0557418	-0.0578215	-0.0598429	-0.061804	-0.063703	-0.0655378	-0.0673066	-0.0690076	-0.0706391	-0.0721995	-0.0736872	-0.0751008	-0.0764386	-0.0776996	-0.0788823	-0.0799855	-0.0810083	-0.0819494	-0.0828081	-0.0835833	-0.0842744	-0.0848807	-0.0854014	-0.0858362	-0.0861846	-0.0864461	-0.0866207	-0.086708
-3.38162e-18	-0.00175221	-0.00350265	-0.00524957	-0.0069912	-0.00872579	-0.0104516	-0.0121669	-0.0138699	-0.015559	-0.0172324	-0.0188884	-0.0205254	-0.0221418	-0.0237359	-0.025306	-0.0268507	-0.0283684	-0.0298574	-0.0313165	-0.032744	-0.0341385	-0.0354986	-0.036823	-0.0381103	-0.0393593	-0.0405686	-0.041737	-0.0428635	-0.0439468	-0.0449858	-0.0459795	-0.046927	-0.0478271	-0.0486792	-0.0494822	-0.0502354	-0.050938	-0.0515893	-0.0521886	-0.0527355	-0.0532292	-0.0536693	-0.0540554	-0.054387	-0.0546639	-0.0548858	-0.0550523	-0.0551635	-0.0552191
-1.44987e-18	-0.000751258	-0.00150176	-0.00225075	-0.00299747	-0.00374118	-0.00448112	-0.00521654	-0.00594672	-0.0066709	-0.00738837	-0.0080984	-0.00880027	-0.00949329	-0.0101767	-0.0108499	-0.0115122	-0.0121629	-0.0128014	-0.0134269	-0.014039	-0.0146369	-0.01522	-0.0157878	-0.0163398	-0.0168753	-0.0173938	-0.0178947	-0.0183777	-0.0188422	-0.0192876	-0.0197137	-0.0201199	-0.0205059	-0.0208712	-0.0212155	-0.0215384	-0.0218396	-0.0221189	-0.0223759	-0.0226103	-0.022822	-0.0230107	-0.0231762	-0.0233184	-0.0234371	-0.0235322	-0.0236037	-0.0236513	-0.0236752
4.83329e-19	0.00025044	0.000500628	0.000750312	0.000999241	0.00124716	0.00149383	0.00173899	0.0019824	0.00222382	0.00246299	0.00269969	0.00293367	0.00316469	0.00339253	0.00361695	0.00383773	0.00405464	0.00426748	0.00447601	0.00468004	0.00487936	0.00507376	0.00526305	0.00544705	0.00562556	0.0057984	0.00596541	0.00612641	0.00628124	0.00642975	0.00657178	0.00670719	0.00683586	0.00695763	0.00707241	0.00718006	0.00728048	0.00737357	0.00745924	0.00753739	0.00760796	0.00767087	0.00772605	0.00777345	0.00781302	0.00784473	0.00786854	0.00788443	0.00789237
2.41604e-18	0.00125189	0.00250252	0.00375063	0.00499496	0.00623426	0.00746729	0.00869279	0.00990955	0.0111163	0.0123119	0.0134951	0.0146647	0.0158195	0.0169584	0.0180802	0.0191839	0.0202682	0.0213321	0.0223745	0.0233944	0.0243907	0.0253625	0.0263087	0.0272284	0.0281208	0.0289848	0.0298196	0.0306244	0.0313984	0.0321407	0.0328507	0.0335276	0.0341708	0.0347795	0.0353532	0.0358913	0.0363933	0.0368587	0.0372869	0.0376776	0.0380303	0.0383448	0.0386206	0.0388576	0.0390554	0.0392139	0.0393329	0.0394123	0.039452
4.34635e-18	0.00225209	0.00450191	0.0067472	0.0089857	0.0112151	0.0134333	0.0156379	0.0178268	0.0199977	0.0221485	0.024277	0.0263811	0.0284586	0.0305074	0.0325255	0.0345109	0.0364615	0.0383754	0.0402506	0.0420854	0.0438777	0.0456259	0.0473281	0.0489827	0.050588	0.0521423	0.0536441	0.0550919	0.0564842	0.0578197	0.0590969	0.0603146	0.0614716	0.0625667	0.0635988	0.0645669	0.0654699	0.066307	0.0670774	0.0677802	0.0684148	0.0689804	0.0694767	0.0699029	0.0702588	0.0705439	0.070758	0.0709009	0.0709724
6.27233e-18	0.00325005	0.00649682	0.00973705	0.0129675	0.0161848	0.0193859	0.0225675	0.0257263	0.0288592	0.0319631	0.0350348	0.0380712	0.0410693	0.044026	0.0469384	0.0498035	0.0526185	0.0553805	0.0580867	0.0607344	0.063321	0.0658438	0.0683004	0.0706881	0.0730047	0.0752478	0.0774151	0.0795044	0.0815137	0.083441	0.0852842	0.0870415	0.0887112	0.0902915	0.091781	0.093178	0.0944812	0.0956893	0.096801	0.0978153	0.098731	0.0995474	0.100263	0.100879	0.101392	0.101804	0.102113	0.102319	0.102422
8.19205e-18	0.00424476	0.00848525	0.0127172	0.0169363	0.0211384	0.0253192	0.0294745	0.0336002	0.037692	0.0417458	0.0457576	0.0497233	0.053639	0.0575007	0.0613044	0.0650465	0.068723	0.0723303	0.0758648	0.0793229	0.0827012	0.0859962	0.0892045	0.0923231	0.0953487	0.0982783	0.101109	0.103838	0.106462	0.108979	0.111386	0.113682	0.115862	0.117926	0.119872	0.121696	0.123398	0.124976	0.126428	0.127753	0.128949	0.130015	0.13095	0.131754	0.132425	0.132962	0.133365	0.133635	0.133769
1.01036e-17	0.00523525	0.0104652	0.0156847	0.0208883	0.0260709	0.0312273	0.0363522	0.0414405	0.0464871	0.0514869	0.0564348	0.0613259	0.0661553	0.070918	0.0756094	0.0802246	0.084759	0.0892081	0.0935673	0.0978324	0.101999	0.106063	0.11002	0.113866	0.117598	0.121211	0.124702	0.128068	0.131304	0.134409	0.137378	0.140208	0.142898	0.145444	0.147843	0.150093	0.152192	0.154138	0.155929	0.157563	0.159038	0.160353	0.161507	0.162498	0.163325	0.163988	0.164485	0.164817	0.164984
1.20051e-17	0.00622051	0.0124348	0.0186365	0.0248195	0.0309774	0.0371042	0.0431936	0.0492396	0.0552359	0.0611766	0.0670558	0.0728674	0.0786056	0.0842647	0.089839	0.0953227	0.100711	0.105997	0.111177	0.116244	0.121195	0.126024	0.130725	0.135295	0.139729	0.144023	0.148171	0.15217	0.156015	0.159704	0.163232	0.166595	0.169791	0.172816	0.175667	0.178341	0.180835	0.183147	0.185275	0.187216	0.188969	0.190531	0.191902	0.193079	0.194062	0.19485	0.195441	0.195836	0.196033
1.38946e-17	0.00719958	0.0143919	0.0215697	0.0287259	0.0358531	0.0429442	0.049992	0.0569895	0.0639297	0.0708054	0.0776099	0.0843362	0.0909776	0.0975274	0.103979	0.110326	0.116562	0.12268	0.128675	0.13454	0.14027	0.145859	0.151301	0.15659	0.161722	0.166691	0.171492	0.17612	0.180571	0.18484	0.188924	0.192816	0.196515	0.200016	0.203315	0.20641	0.209297	0.211973	0.214436	0.216683	0.218711	0.22052	0.222106	0.223469	0.224606	0.225518	0.226202	0.226659	0.226888
1.57703e-17	0.00817147	0.0163347	0.0244815	0.0326036	0.040693	0.0487413	0.0567406	0.0646827	0.0725597	0.0803636	0.0880866	0.0957209	0.103259	0.110693	0.118015	0.125219	0.132297	0.139241	0.146045	0.152702	0.159206	0.165549	0.171725	0.177729	0.183553	0.189193	0.194642	0.199895	0.204947	0.209792	0.214427	0.218845	0.223043	0.227017	0.230761	0.234274	0.237551	0.240588	0.243383	0.245933	0.248236	0.250288	0.252089	0.253635	0.254927	0.255961	0.256738	0.257256	0.257516
1.76302e-17	0.00913521	0.0182612	0.0273689	0.0364489	0.0454923	0.0544898	0.0634325	0.0723114	0.0811174	0.0898417	0.0984756	0.10701	0.115437	0.123748	0.131934	0.139987	0.1479	0.155663	0.16327	0.170712	0.177982	0.185074	0.191978	0.19869	0.205201	0.211506	0.217598	0.223471	0.229118	0.234535	0.239716	0.244656	0.249349	0.253791	0.257977	0.261904	0.265567	0.268963	0.272088	0.274939	0.277513	0.279807	0.28182	0.283549	0.284993	0.286149	0.287018	0.287597	0.287887
1.94726e-17	0.0100898	0.0201695	0.0302289	0.0402579	0.0502463	0.0601841	0.0700613	0.079868	0.0895942	0.0992302	0.108766	0.118193	0.127501	0.13668	0.145721	0.154616	0.163355	0.17193	0.180332	0.188552	0.196582	0.204414	0.21204	0.219453	0.226645	0.233609	0.240337	0.246824	0.253061	0.259045	0.264767	0.270222	0.275406	0.280312	0.284936	0.289273	0.293319	0.29707	0.300521	0.30367	0.306513	0.309047	0.31127	0.31318	0.314775	0.316052	0.317011	0.317651	0.317972
2.12956e-17	0.0110344	0.0220577	0.0330589	0.0440267	0.0549502	0.0658183	0.0766202	0.0873449	0.0979817	0.10852	0.118949	0.129258	0.139437	0.149475	0.159363	0.169091	0.178648	0.188026	0.197214	0.206203	0.214985	0.22355	0.231891	0.239998	0.247863	0.255478	0.262837	0.26993	0.276752	0.283295	0.289553	0.29552	0.301189	0.306554	0.311611	0.316354	0.320779	0.324881	0.328655	0.332099	0.335208	0.337979	0.340411	0.342499	0.344243	0.34564	0.346689	0.347389	0.347739
2.30973e-17	0.011968	0.023924	0.0358558	0.0477516	0.0595993	0.071387	0.0831027	0.0947349	0.106272	0.117701	0.129012	0.140194	0.151234	0.162122	0.172846	0.183397	0.193763	0.203934	0.213899	0.223649	0.233174	0.242464	0.25151	0.260303	0.268833	0.277093	0.285074	0.292768	0.300167	0.307264	0.314051	0.320523	0.326671	0.332491	0.337975	0.34312	0.347919	0.352367	0.356461	0.360196	0.363568	0.366574	0.369211	0.371477	0.373368	0.374883	0.376021	0.37678	0.37716
2.4876e-17	0.0128897	0.0257663	0.0386171	0.0514289	0.064189	0.0768844	0.0895024	0.10203	0.114455	0.126765	0.138948	0.15099	0.16288	0.174607	0.186157	0.19752	0.208684	0.219638	0.230371	0.240872	0.251131	0.261136	0.270879	0.280349	0.289536	0.298432	0.307028	0.315314	0.323283	0.330926	0.338236	0.345206	0.351828	0.358096	0.364003	0.369543	0.374712	0.379503	0.383912	0.387935	0.391567	0.394804	0.397644	0.400084	0.402121	0.403753	0.404978	0.405796	0.406205
2.66299e-17	0.0137985	0.027583	0.0413398	0.055055	0.0687147	0.0823053	0.0958129	0.109224	0.122525	0.135703	0.148744	0.161636	0.174364	0.186918	0.199282	0.211447	0.223398	0.235124	0.246614	0.257855	0.268837	0.279548	0.289977	0.300115	0.30995	0.319474	0.328675	0.337546	0.346076	0.354259	0.362084	0.369545	0.376634	0.383344	0.389667	0.395598	0.401131	0.40626	0.41098	0.415286	0.419174	0.42264	0.425681	0.428292	0.430473	0.43222	0.433532	0.434407	0.434845
2.83573e-17	0.0146935	0.0293722	0.0440214	0.0586262	0.0731719	0.087644	0.102028	0.116309	0.130473	0.144506	0.158393	0.17212	0.185675	0.199042	0.212209	0.225162	0.237889	0.250376	0.262611	0.274581	0.286275	0.297681	0.308787	0.319582	0.330055	0.340196	0.349995	0.359441	0.368525	0.377238	0.385571	0.393516	0.401065	0.408209	0.414943	0.421259	0.427151	0.432613	0.437639	0.442224	0.446364	0.450055	0.453293	0.456074	0.458396	0.460256	0.461653	0.462585	0.463051
3.00564e-17	0.0155739	0.0311321	0.046659	0.0621389	0.0775562	0.0928955	0.108141	0.123278	0.138291	0.153164	0.167883	0.182433	0.1968	0.210968	0.224924	0.238654	0.252143	0.265378	0.278346	0.291034	0.303428	0.315517	0.327289	0.338731	0.349832	0.36058	0.370966	0.380978	0.390606	0.399841	0.408673	0.417094	0.425095	0.432668	0.439806	0.4465	0.452745	0.458534	0.463861	0.468721	0.47311	0.477021	0.480453	0.483401	0.485862	0.487833	0.489314	0.490302	0.490796
3.17255e-17	0.0164388	0.032861	0.0492502	0.0655897	0.0818632	0.0980543	0.114147	0.130124	0.14597	0.16167	0.177206	0.192565	0.207729	0.222684	0.237415	0.251907	0.266145	0.280115	0.293803	0.307196	0.320279	0.333039	0.345464	0.357542	0.369259	0.380604	0.391567	0.402135	0.412298	0.422046	0.431369	0.440257	0.448703	0.456696	0.46423	0.471296	0.477887	0.483998	0.489621	0.494751	0.499383	0.503512	0.507134	0.510246	0.512843	0.514925	0.516487	0.51753	0.518052
3.3363e-17	0.0172873	0.0345571	0.0517922	0.0689751	0.0860886	0.103115	0.120038	0.13684	0.153505	0.170014	0.186353	0.202504	0.218451	0.234178	0.249669	0.264909	0.279882	0.294573	0.308968	0.323052	0.33681	0.350229	0.363296	0.375996	0.388318	0.400249	0.411777	0.422891	0.433579	0.44383	0.453634	0.462981	0.471862	0.480268	0.488191	0.495622	0.502554	0.50898	0.514893	0.520288	0.525159	0.529501	0.53331	0.536582	0.539314	0.541503	0.543146	0.544243	0.544791
3.49673e-17	0.0181185	0.0362188	0.0542826	0.0722918	0.0902282	0.108074	0.12581	0.14342	0.160886	0.17819	0.195314	0.212241	0.228955	0.245438	0.261674	0.277647	0.29334	0.308738	0.323825	0.338586	0.353005	0.36707	0.380765	0.394076	0.406991	0.419495	0.431578	0.443226	0.454427	0.465171	0.475447	0.485244	0.494552	0.503362	0.511665	0.519454	0.526719	0.533454	0.539651	0.545306	0.550411	0.554962	0.558954	0.562384	0.565247	0.567541	0.569263	0.570412	0.570987
3.65367e-17	0.0189317	0.0378444	0.0567189	0.0755364	0.0942778	0.112924	0.131457	0.149857	0.168107	0.186187	0.20408	0.221767	0.239231	0.256454	0.273419	0.290108	0.306506	0.322595	0.338359	0.353782	0.368849	0.383545	0.397854	0.411763	0.425257	0.438323	0.450948	0.463118	0.474823	0.486049	0.496786	0.507022	0.516748	0.525954	0.53463	0.542768	0.550359	0.557396	0.563872	0.56978	0.575114	0.57987	0.584041	0.587624	0.590616	0.593013	0.594813	0.596014	0.596614
3.80697e-17	0.019726	0.0394322	0.0590987	0.0787057	0.0982334	0.117662	0.136973	0.156145	0.17516	0.193999	0.212642	0.231072	0.249269	0.267214	0.284891	0.302281	0.319366	0.33613	0.352555	0.368626	0.384325	0.399637	0.414547	0.429039	0.4431	0.456714	0.469868	0.48255	0.494745	0.506442	0.517629	0.528296	0.53843	0.548022	0.557062	0.565541	0.573451	0.580783	0.587531	0.593687	0.599245	0.6042	0.608546	0.61228	0.615397	0.617894	0.61977	0.621021	0.621647
3.95647e-17	0.0205007	0.0409808	0.0614196	0.0817965	0.102091	0.122283	0.142352	0.162277	0.182039	0.201618	0.220993	0.240146	0.259058	0.277708	0.296079	0.314152	0.331908	0.34933	0.3664	0.383102	0.399418	0.415331	0.430827	0.445888	0.460501	0.47465	0.488321	0.5015	0.514174	0.526331	0.537957	0.549042	0.559574	0.569543	0.578938	0.58775	0.595971	0.603591	0.610604	0.617001	0.622778	0.627927	0.632444	0.636324	0.639564	0.642159	0.644108	0.645409	0.646059
4.10203e-17	0.0212549	0.0424885	0.0636792	0.0848059	0.105847	0.126782	0.147589	0.168247	0.188736	0.209035	0.229124	0.248981	0.268588	0.287925	0.306972	0.325709	0.344119	0.362182	0.37988	0.397196	0.414112	0.430611	0.446677	0.462292	0.477443	0.492112	0.506286	0.51995	0.533091	0.545695	0.557749	0.569242	0.580161	0.590497	0.600237	0.609374	0.617897	0.625797	0.633068	0.639701	0.64569	0.651029	0.655712	0.659735	0.663094	0.665785	0.667805	0.669154	0.669828
4.2435e-17	0.021988	0.0439538	0.0658754	0.0877306	0.109498	0.131154	0.152679	0.17405	0.195245	0.216244	0.237026	0.257568	0.277851	0.297855	0.317558	0.336942	0.355987	0.374673	0.392982	0.410895	0.428394	0.445462	0.462082	0.478236	0.493909	0.509084	0.523747	0.537882	0.551476	0.564514	0.576984	0.588874	0.60017	0.610861	0.620938	0.63039	0.639206	0.64738	0.654901	0.661763	0.667958	0.673481	0.678326	0.682488	0.685962	0.688746	0.690837	0.692231	0.692929
4.38074e-17	0.0226991	0.0453753	0.0680059	0.0905679	0.113039	0.135396	0.157617	0.179679	0.20156	0.223238	0.244691	0.265898	0.286837	0.307488	0.327829	0.347839	0.3675	0.38679	0.405691	0.424184	0.442249	0.459869	0.477026	0.493703	0.509882	0.525548	0.540685	0.555278	0.569311	0.582771	0.595645	0.607918	0.61958	0.630618	0.64102	0.650777	0.659879	0.668317	0.676081	0.683165	0.689561	0.695262	0.700264	0.70456	0.708147	0.711021	0.713179	0.714619	0.715339
4.51361e-17	0.0233876	0.0467516	0.0700686	0.093315	0.116467	0.139503	0.162397	0.185129	0.207673	0.230009	0.252113	0.273963	0.295538	0.316814	0.337772	0.35839	0.378647	0.398522	0.417996	0.43705	0.455663	0.473818	0.491495	0.508677	0.525348	0.541489	0.557085	0.57212	0.586579	0.600448	0.613712	0.626357	0.638373	0.649745	0.660463	0.670516	0.679894	0.688588	0.696588	0.703886	0.710476	0.716351	0.721504	0.725931	0.729626	0.732587	0.734811	0.736294	0.737036
4.64199e-17	0.0240528	0.0480813	0.0720614	0.095969	0.11978	0.14347	0.167016	0.190394	0.21358	0.236551	0.259284	0.281755	0.303943	0.325825	0.347379	0.368583	0.389416	0.409857	0.429885	0.44948	0.468623	0.487294	0.505474	0.523145	0.540289	0.55689	0.572929	0.588392	0.603263	0.617525	0.631166	0.644172	0.656529	0.668225	0.679248	0.689587	0.699232	0.708172	0.7164	0.723906	0.730683	0.736725	0.742025	0.746577	0.750378	0.753423	0.75571	0.757236	0.757999
4.76574e-17	0.024694	0.0493631	0.0739825	0.0985274	0.122973	0.147295	0.171469	0.195469	0.219273	0.242857	0.266196	0.289266	0.312046	0.334511	0.356639	0.378409	0.399797	0.420783	0.441345	0.461462	0.481115	0.500284	0.518949	0.537091	0.554693	0.571735	0.588203	0.604078	0.619344	0.633988	0.647992	0.661344	0.674031	0.686038	0.697355	0.70797	0.717872	0.727051	0.735498	0.743204	0.750162	0.756365	0.761806	0.76648	0.770382	0.773508	0.775856	0.777422	0.778206
4.88473e-17	0.0253106	0.0505956	0.0758298	0.100988	0.126044	0.150973	0.17575	0.20035	0.224749	0.248921	0.272842	0.296489	0.319837	0.342863	0.365544	0.387857	0.40978	0.431289	0.452365	0.472985	0.493128	0.512776	0.531907	0.550502	0.568543	0.586011	0.60289	0.619161	0.634809	0.649818	0.664172	0.677858	0.690861	0.703168	0.714768	0.725647	0.735796	0.745205	0.753862	0.761761	0.768893	0.77525	0.780827	0.785618	0.789618	0.792822	0.795228	0.796834	0.797637
4.99886e-17	0.0259019	0.0517777	0.0776014	0.103347	0.128989	0.1545	0.179856	0.205031	0.23	0.254737	0.279217	0.303416	0.32731	0.350874	0.374085	0.396919	0.419354	0.441366	0.462934	0.484036	0.50465	0.524756	0.544334	0.563364	0.581826	0.599703	0.616976	0.633627	0.649641	0.665	0.67969	0.693695	0.707002	0.719597	0.731468	0.742601	0.752988	0.762616	0.771476	0.779559	0.786857	0.793363	0.799071	0.803973	0.808066	0.811346	0.813808	0.815451	0.816273
5.108e-17	0.0264675	0.0529083	0.0792958	0.105603	0.131805	0.157873	0.183783	0.209508	0.235021	0.260298	0.285313	0.310041	0.334456	0.358535	0.382253	0.405585	0.42851	0.451003	0.473042	0.494604	0.515668	0.536214	0.556219	0.575664	0.59453	0.612797	0.630447	0.647462	0.663825	0.67952	0.69453	0.708841	0.722439	0.735309	0.747438	0.758815	0.769428	0.779266	0.78832	0.79658	0.804037	0.810686	0.816517	0.821527	0.825709	0.82906	0.831577	0.833255	0.834095
5.21206e-17	0.0270066	0.053986	0.0809111	0.107755	0.13449	0.161089	0.187527	0.213776	0.239809	0.265601	0.291125	0.316357	0.341269	0.365839	0.390039	0.413847	0.437239	0.46019	0.482678	0.504679	0.526173	0.547137	0.567549	0.587391	0.606641	0.62528	0.643289	0.660651	0.677347	0.693362	0.708678	0.723281	0.737155	0.750287	0.762664	0.774273	0.785102	0.79514	0.804378	0.812806	0.820416	0.8272	0.83315	0.838262	0.842529	0.845949	0.848516	0.850229	0.851086
5.31091e-17	0.0275188	0.05501	0.0824457	0.109798	0.137041	0.164145	0.191084	0.21783	0.244357	0.270638	0.296647	0.322357	0.347742	0.372777	0.397437	0.421697	0.445532	0.468918	0.491833	0.514252	0.536153	0.557514	0.578314	0.598532	0.618147	0.637139	0.65549	0.673181	0.690194	0.706513	0.722119	0.736999	0.751137	0.764518	0.777129	0.788958	0.799993	0.810222	0.819635	0.828223	0.835977	0.842889	0.848953	0.854161	0.85851	0.861994	0.86461	0.866356	0.867229
5.40448e-17	0.0280036	0.0559791	0.0838982	0.111733	0.139455	0.167037	0.19445	0.221668	0.248662	0.275406	0.301873	0.328036	0.353868	0.379345	0.404439	0.429126	0.453381	0.477179	0.500497	0.523311	0.545598	0.567336	0.588502	0.609076	0.629037	0.648364	0.667038	0.685041	0.702354	0.718959	0.734841	0.749983	0.76437	0.777987	0.79082	0.802858	0.814086	0.824496	0.834075	0.842814	0.850704	0.857738	0.863909	0.869209	0.873634	0.87718	0.879842	0.881618	0.882507
5.49265e-17	0.0284605	0.0568924	0.085267	0.113556	0.14173	0.169762	0.197623	0.225284	0.252719	0.2799	0.306798	0.333388	0.359642	0.385534	0.411038	0.436127	0.460778	0.484965	0.508663	0.531849	0.5545	0.576592	0.598104	0.619013	0.6393	0.658942	0.677921	0.696217	0.713813	0.730689	0.74683	0.762219	0.776841	0.79068	0.803723	0.815956	0.827369	0.837948	0.847683	0.856565	0.864584	0.871733	0.878004	0.88339	0.887888	0.891491	0.894197	0.896002	0.896905
5.57535e-17	0.0288891	0.057749	0.0865508	0.115265	0.143864	0.172318	0.200598	0.228676	0.256524	0.284114	0.311418	0.338408	0.365057	0.391339	0.417226	0.442694	0.467716	0.492267	0.516322	0.539857	0.562849	0.585274	0.607109	0.628334	0.648925	0.668864	0.688128	0.7067	0.72456	0.741691	0.758075	0.773696	0.788537	0.802585	0.815824	0.828242	0.839826	0.850564	0.860446	0.869462	0.877602	0.884858	0.891223	0.896691	0.901256	0.904914	0.90766	0.909493	0.91041
5.6525e-17	0.0292888	0.0585481	0.0877484	0.11686	0.145855	0.174702	0.203374	0.23184	0.260074	0.288045	0.315727	0.34309	0.370108	0.396753	0.422999	0.448819	0.474187	0.499078	0.523466	0.547327	0.570637	0.593372	0.61551	0.637028	0.657904	0.678118	0.697649	0.716478	0.734586	0.751953	0.768564	0.784401	0.799448	0.813689	0.827112	0.839702	0.851446	0.862333	0.872352	0.881492	0.889744	0.897101	0.903555	0.909098	0.913727	0.917435	0.920219	0.922077	0.923006
5.724e-17	0.0296593	0.0592887	0.0888585	0.118339	0.1477	0.176912	0.205946	0.234773	0.263364	0.291689	0.319721	0.34743	0.37479	0.401773	0.428351	0.454497	0.480186	0.505391	0.530088	0.554251	0.577855	0.600878	0.623296	0.645086	0.666227	0.686697	0.706475	0.725542	0.743879	0.761466	0.778287	0.794324	0.809561	0.823983	0.837576	0.850325	0.862217	0.873242	0.883387	0.892643	0.901	0.90845	0.914985	0.920599	0.925286	0.929041	0.931861	0.933742	0.934683
5.78981e-17	0.0300003	0.0599703	0.08988	0.119699	0.149398	0.178946	0.208314	0.237472	0.266391	0.295042	0.323396	0.351424	0.379099	0.406391	0.433275	0.459722	0.485706	0.511201	0.536182	0.560622	0.584498	0.607786	0.630462	0.652502	0.673886	0.694591	0.714597	0.733883	0.75243	0.77022	0.787234	0.803455	0.818868	0.833456	0.847204	0.8601	0.872129	0.883281	0.893543	0.902905	0.911358	0.918894	0.925504	0.931182	0.935923	0.939721	0.942573	0.944476	0.945428
5.84984e-17	0.0303113	0.0605921	0.0908119	0.12094	0.150947	0.180801	0.210474	0.239934	0.269153	0.298101	0.326749	0.355068	0.383029	0.410605	0.437767	0.464489	0.490742	0.516502	0.541741	0.566435	0.590559	0.614088	0.636998	0.659268	0.680873	0.701793	0.722006	0.741492	0.760232	0.778206	0.795396	0.811786	0.827358	0.842097	0.855989	0.869018	0.881172	0.892439	0.902807	0.912267	0.920808	0.928421	0.9351	0.940837	0.945627	0.949465	0.952346	0.954269	0.955231
5.90404e-17	0.0305922	0.0611535	0.0916533	0.122061	0.152345	0.182477	0.212424	0.242158	0.271647	0.300863	0.329777	0.358358	0.386578	0.414409	0.441823	0.468792	0.495289	0.521287	0.546761	0.571683	0.59603	0.619777	0.6429	0.665376	0.687181	0.708295	0.728696	0.748362	0.767276	0.785416	0.802766	0.819307	0.835024	0.8499	0.863919	0.877069	0.889336	0.900708	0.911172	0.920719	0.929339	0.937023	0.943764	0.949554	0.954388	0.958261	0.96117	0.96311	0.964081
5.95235e-17	0.0308425	0.0616539	0.0924033	0.12306	0.153592	0.18397	0.214162	0.244139	0.27387	0.303325	0.332475	0.36129	0.389742	0.417801	0.445439	0.472628	0.499342	0.525553	0.551235	0.576362	0.600908	0.624849	0.648161	0.670821	0.692805	0.714091	0.734659	0.754486	0.773554	0.791843	0.809335	0.826012	0.841857	0.856854	0.870989	0.884247	0.896614	0.908078	0.918629	0.928254	0.936944	0.944691	0.951487	0.957325	0.962198	0.966103	0.969035	0.970992	0.97197
5.99473e-17	0.0310621	0.0620929	0.0930612	0.123936	0.154686	0.18528	0.215687	0.245877	0.27582	0.305485	0.334843	0.363863	0.392517	0.420775	0.44861	0.475994	0.502897	0.529295	0.55516	0.580465	0.605186	0.629298	0.652776	0.675597	0.697738	0.719176	0.73989	0.759858	0.779062	0.797481	0.815098	0.831893	0.847851	0.862955	0.877191	0.890543	0.902998	0.914544	0.925169	0.934863	0.943615	0.951417	0.958261	0.964141	0.969049	0.972982	0.975935	0.977905	0.978891
6.03114e-17	0.0312507	0.06247	0.0936264	0.124688	0.155625	0.186405	0.216997	0.247371	0.277495	0.30734	0.336876	0.366073	0.3949	0.423331	0.451335	0.478884	0.505952	0.532509	0.558531	0.58399	0.608862	0.63312	0.656741	0.6797	0.701975	0.723543	0.744383	0.764473	0.783793	0.802324	0.820048	0.836945	0.853	0.868196	0.882518	0.895951	0.908482	0.920098	0.930788	0.94054	0.949346	0.957195	0.964081	0.969996	0.974934	0.978891	0.981862	0.983844	0.984836
6.06153e-17	0.0314082	0.0627848	0.0940982	0.125317	0.156409	0.187344	0.218091	0.248617	0.278894	0.308889	0.338574	0.367917	0.39689	0.425464	0.453609	0.481297	0.508501	0.535193	0.561346	0.586933	0.61193	0.63631	0.66005	0.683125	0.705513	0.727189	0.748134	0.768325	0.787743	0.806368	0.82418	0.841163	0.857299	0.872571	0.886965	0.900466	0.91306	0.924735	0.935478	0.94528	0.95413	0.962019	0.968939	0.974884	0.979847	0.983824	0.98681	0.988802	0.989799
6.08588e-17	0.0315344	0.063037	0.0944762	0.12582	0.157038	0.188097	0.218967	0.249616	0.280014	0.31013	0.339934	0.369395	0.398485	0.427173	0.455431	0.483231	0.510544	0.537343	0.563601	0.589291	0.614388	0.638867	0.662702	0.68587	0.708347	0.730111	0.75114	0.771412	0.790908	0.809607	0.827491	0.844542	0.860743	0.876077	0.890528	0.904083	0.916728	0.92845	0.939236	0.949078	0.957963	0.965884	0.972832	0.978801	0.983784	0.987776	0.990774	0.992774	0.993775
6.10417e-17	0.0316291	0.0632264	0.0947601	0.126198	0.157509	0.188662	0.219625	0.250366	0.280855	0.311062	0.340955	0.370505	0.399682	0.428457	0.4568	0.484683	0.512078	0.538957	0.565294	0.591062	0.616234	0.640786	0.664693	0.68793	0.710475	0.732304	0.753396	0.77373	0.793284	0.81204	0.829977	0.84708	0.863329	0.878709	0.893204	0.9068	0.919482	0.931239	0.942058	0.951929	0.960841	0.968786	0.975755	0.981741	0.986739	0.990744	0.993751	0.995757	0.996761
6.11637e-17	0.0316924	0.0633528	0.0949495	0.126451	0.157824	0.189039	0.220063	0.250866	0.281417	0.311684	0.341637	0.371246	0.400481	0.429313	0.457713	0.485652	0.513101	0.540035	0.566424	0.592243	0.617466	0.642067	0.666021	0.689305	0.711895	0.733768	0.754902	0.775276	0.79487	0.813663	0.831636	0.848773	0.865054	0.880465	0.894989	0.908612	0.92132	0.9331	0.943941	0.953832	0.962761	0.970722	0.977705	0.983703	0.988712	0.992724	0.995737	0.997747	0.998753
6.12247e-17	0.031724	0.063416	0.0950442	0.126577	0.157982	0.189228	0.220283	0.251117	0.281697	0.311995	0.341978	0.371616	0.400881	0.429741	0.458169	0.486136	0.513613	0.540573	0.566989	0.592834	0.618082	0.642708	0.666686	0.689993	0.712605	0.7345	0.755655	0.77605	0.795663	0.814474	0.832466	0.84962	0.865917	0.881344	0.895882	0.909519	0.922239	0.934031	0.944883	0.954783	0.963722	0.97169	0.97868	0.984685	0.989698	0.993715	0.996731	0.998743	0.99975
6.12247e-17	0.031724	0.063416	0.0950442	0.126577	0.157982	0.189228	0.220283	0.251117	0.281697	0.311995	0.341978	0.371616	0.400881	0.429741	0.458169	0.486136	0.513613	0.540573	0.566989	0.592834	0.618082	0.642708	0.666686	0.689993	0.712605	0.7345	0.755655	0.77605	0.795663	0.814474	0.832466	0.84962	0.865917	0.881344	0.895882	0.909519	0.922239	0.934031	0.944883	0.954783	0.963722	0.97169	0.97868	0.984685	0.989698	0.993715	0.996731	0.998743	0.99975
6.11637e-17	0.0316924	0.0633528	0.0949495	0.126451	0.157824	0.189039	0.220063	0.250866	0.281417	0.311684	0.341637	0.371246	0.400481	0.429313	0.457713	0.485652	0.513101	0.540035	0.566424	0.592243	0.617466	0.642067	0.666021	0.689305	0.711895	0.733768	0.754902	0.775276	0.79487	0.813663	0.831636	0.848773	0.865054	0.880465	0.894989	0.908612	0.92132	0.9331	0.943941	0.953832	0.962761	0.970722	0.977705	0.983703	0.988712	0.992724	0.995737	0.997747	0.998753
6.10417e-17	0.0316291	0.0632264	0.0947601	0.126198	0.157509	0.188662	0.219625	0.250366	0.280855	0.311062	0.340955	0.370505	0.399682	0.428457	0.4568	0.484683	0.512078	0.538957	0.565294	0.591062	0.616234	0.640786	0.664693	0.68793	0.710475	0.732304	0.753396	0.77373	0.793284	0.81204	0.829977	0.84708	0.863329	0.878709	0.893204	0.9068	0.919482	0.931239	0.942058	0.951929	0.960841	0.968786	0.975755	0.981741	0.986739	0.990744	0.993751	0.995757	0.996761
6.08588e-17	0.0315344	0.063037	0.0944762	0.12582	0.157038	0.188097	0.218967	0.249616	0.280014	0.31013	0.339934	0.369395	0.398485	0.427173	0.455431	0.483231	0.510544	0.537343	0.563601	0.589291	0.614388	0.638867	0.662702	0.68587	0.708347	0.730111	0.75114	0.771412	0.790908	0.809607	0.827491	0.844542	0.860743	0.876077	0.890528	0.904083	0.916728	0.92845	0.939236	0.949078	0.957963	0.965884	0.972832	0.978801	0.983784	0.987776	0.990774	0.992774	0.993775
6.06153e-17	0.0314082	0.0627848	0.0940982	0.125317	0.156409	0.187344	0.218091	0.248617	0.278894	0.308889	0.338574	0.367917	0.39689	0.425464	0.453609	0.481297	0.508501	0.535193	0.561346	0.586933	0.61193	0.63631	0.66005	0.683125	0.705513	0.727189	0.748134	0.768325	0.787743	0.806368	0.82418	0.841163	0.857299	0.872571	0.886965	0.900466	0.91306	0.924735	0.935478	0.94528	0.95413	0.962019	0.968939	0.974884	0.979847	0.983824	0.98681	0.988802	0.989799
6.03114e-17	0.0312507	0.06247	0.0936264	0.124688	0.155625	0.186405	0.216997	0.247371	0.277495	0.30734	0.336876	0.366073	0.3949	0.423331	0.451335	0.478884	0.505952	0.532509	0.558531	0.58399	0.608862	0.63312	0.656741	0.6797	0.701975	0.723543	0.744383	0.764473	0.783793	0.802324	0.820048	0.836945	0.853	0.868196	0.882518	0.895951	0.908482	0.920098	0.930788	0.94054	0.949346	0.957195	0.964081	0.969996	0.974934	0.978891	0.981862	0.983844	0.984836
5.99473e-17	0.0310621	0.0620929	0.0930612	0.123936	0.154686	0.18528	0.215687	0.245877	0.27582	0.305485	0.334843	0.363863	0.392517	0.420775	0.44861	0.475994	0.502897	0.529295	0.55516	0.580465	0.605186	0.629298	0.652776	0.675597	0.697738	0.719176	0.73989	0.759858	0.779062	0.797481	0.815098	0.831893	0.847851	0.862955	0.877191	0.890543	0.902998	0.914544	0.925169	0.934863	0.943615	0.951417	0.958261	0.964141	0.969049	0.972982	0.975935	0.977905	0.978891
5.95235e-17	0.0308425	0.0616539	0.0924033	0.12306	0.153592	0.18397	0.214162	0.244139	0.27387	0.303325	0.332475	0.36129	0.389742	0.417801	0.445439	0.472628	0.499342	0.525553	0.551235	0.576362	0.600908	0.624849	0.648161	0.670821	0.692805	0.714091	0.734659	0.754486	0.773554	0.791843	0.809335	0.826012	0.841857	0.856854	0.870989	0.884247	0.896614	0.908078	0.918629	0.928254	0.936944	0.944691	0.951487	0.957325	0.962198	0.966103	0.969035	0.970992	0.97197
5.90404e-17	0.0305922	0.0611535	0.0916533	0.122061	0.152345	0.182477	0.212424	0.242158	0.271647	0.300863	0.329777	0.358358	0.386578	0.414409	0.441823	0.468792	0.495289	0.521287	0.546761	0.571683	0.59603	0.619777	0.6429	0.665376	0.687181	0.708295	0.728696	0.748362	0.767276	0.785416	0.802766	0.819307	0.835024	0.8499	0.863919	0.877069	0.889336	0.900708	0.911172	0.920719	0.929339	0.937023	0.943764	0.949554	0.954388	0.958261	0.96117	0.96311	0.964081
5.84984e-17	0.0303113	0.0605921	0.0908119	0.12094	0.150947	0.180801	0.210474	0.239934	0.269153	0.298101	0.326749	0.355068	0.383029	0.410605	0.437767	0.464489	0.490742	0.516502	0.541741	0.566435	0.590559	0.614088	0.636998	0.659268	0.680873	0.701793	0.722006	0.741492	0.760232	0.778206	0.795396	0.811786	0.827358	0.842097	0.855989	0.869018	0.881172	0.892439	0.902807	0.912267	0.920808	0.928421	0.9351	0.940837	0.945627	0.949465	0.952346	0.954269	0.955231
5.78981e-17	0.0300003	0.0599703	0.08988	0.119699	0.149398	0.178946	0.208314	0.237472	0.266391	0.295042	0.323396	0.351424	0.379099	0.406391	0.433275	0.459722	0.485706	0.511201	0.536182	0.560622	0.584498	0.607786	0.630462	0.652502	0.673886	0.694591	0.714597	0.733883	0.75243	0.77022	0.787234	0.803455	0.818868	0.833456	0.847204	0.8601	0.872129	0.883281	0.893543	0.902905	0.911358	0.918894	0.925504	0.931182	0.935923	0.939721	0.942573	0.944476	0.945428
5.724e-17	0.0296593	0.0592887	0.0888585	0.118339	0.1477	0.176912	0.205946	0.234773	0.263364	0.291689	0.319721	0.34743	0.37479	0.401773	0.428351	0.454497	0.480186	0.505391	0.530088	0.554251	0.577855	0.600878	0.623296	0.645086	0.666227	0.686697	0.706475	0.725542	0.743879	0.761466	0.778287	0.794324	0.809561	0.823983	0.837576	0.850325	0.862217	0.873242	0.883387	0.892643	0.901	0.90845	0.914985	0.920599	0.925286	0.929041	0.931861	0.933742	0.934683
5.6525e-17	0.0292888	0.0585481	0.0877484	0.11686	0.145855	0.174702	0.203374	0.23184	0.260074	0.288045	0.315727	0.34309	0.370108	0.396753	0.422999	0.448819	0.474187	0.499078	0.523466	0.547327	0.570637	0.593372	0.61551	0.637028	0.657904	0.678118	0.697649	0.716478	0.734586	0.751953	0.768564	0.784401	0.799448	0.813689	0.827112	0.839702	0.851446	0.862333	0.872352	0.881492	0.889744	0.897101	0.903555	0.909098	0.913727	0.917435	0.920219	0.922077	0.923006
5.57535e-17	0.0288891	0.057749	0.0865508	0.115265	0.143864	0.172318	0.200598	0.228676	0.256524	0.284114	0.311418	0.338408	0.365057	0.391339	0.417226	0.442694	0.467716	0.492267	0.516322	0.539857	0.562849	0.585274	0.607109	0.628334	0.648925	0.668864	0.688128	0.7067	0.72456	0.741691	0.758075	0.773696	0.788537	0.802585	0.815824	0.828242	0.839826	0.850564	0.860446	0.869462	0.877602	0.884858	0.891223	0.896691	0.901256	0.904914	0.90766	0.909493	0.91041
5.49265e-17	0.0284605	0.0568924	0.085267	0.113556	0.14173	0.169762	0.197623	0.225284	0.252719	0.2799	0.306798	0.333388	0.359642	0.385534	0.411038	0.436127	0.460778	0.484965	0.508663	0.531849	0.5545	0.576592	0.598104	0.619013	0.6393	0.658942	0.677921	0.696217	0.713813	0.730689	0.74683	0.762219	0.776841	0.79068	0.803723	0.815956	0.827369	0.837948	0.847683	0.856565	0.864584	0.871733	0.878004	0.88339	0.887888	0.891491	0.894197	0.896002	0.896905
5.40448e-17	0.0280036	0.0559791	0.0838982	0.111733	0.139455	0.167037	0.19445	0.221668	0.248662	0.275406	0.301873	0.328036	0.353868	0.379345	0.404439	0.429126	0.453381	0.477179	0.500497	0.523311	0.545598	0.567336	0.588502	0.609076	0.629037	0.648364	0.667038	0.685041	0.702354	0.718959	0.734841	0.749983	0.76437	0.777987	0.79082	0.802858	0.814086	0.824496	0.834075	0.842814	0.850704	0.857738	0.863909	0.869209	0.873634	0.87718	0.879842	0.881618	0.882507
5.31091e-17	0.0275188	0.05501	0.0824457	0.109798	0.137041	0.164145	0.191084	0.21783	0.244357	0.270638	0.296647	0.322357	0.347742	0.372777	0.397437	0.421697	0.445532	0.468918	0.491833	0.514252	0.536153	0.557514	0.578314	0.598532	0.618147	0.637139	0.65549	0.673181	0.690194	0.706513	0.722119	0.736999	0.751137	0.764518	0.777129	0.788958	0.799993	0.810222	0.819635	0.828223	0.835977	0.842889	0.848953	0.854161	0.85851	0.861994	0.86461	0.866356	0.867229
5.21206e-17	0.0270066	0.053986	0.0809111	0.107755	0.13449	0.161089	0.187527	0.213776	0.239809	0.265601	0.291125	0.316357	0.341269	0.365839	0.390039	0.413847	0.437239	0.46019	0.482678	0.504679	0.526173	0.547137	0.567549	0.587391	0.606641	0.62528	0.643289	0.660651	0.677347	0.693362	0.708678	0.723281	0.737155	0.750287	0.762664	0.774273	0.785102	0.79514	0.804378	0.812806	0.820416	0.8272	0.83315	0.838262	0.842529	0.845949	0.848516	0.850229	0.851086
5.108e-17	0.0264675	0.0529083	0.0792958	0.105603	0.131805	0.157873	0.183783	0.209508	0.235021	0.260298	0.285313	0.310041	0.334456	0.358535	0.382253	0.405585	0.42851	0.451003	0.473042	0.494604	0.515668	0.536214	0.556219	0.575664	0.59453	0.612797	0.630447	0.647462	0.663825	0.67952	0.69453	0.708841	0.722439	0.735309	0.747438	0.758815	0.769428	0.779266	0.78832	0.79658	0.804037	0.810686	0.816517	0.821527	0.825709	0.82906	0.831577	0.833255	0.834095
4.99886e-17	0.0259019	0.0517777	0.0776014	0.103347	0.128989	0.1545	0.179856	0.205031	0.23	0.254737	0.279217	0.303416	0.32731	0.350874	0.374085	0.396919	0.419354	0.441366	0.462934	0.484036	0.50465	0.524756	0.544334	0.563364	0.581826	0.599703	0.616976	0.633627	0.649641	0.665	0.67969	0.693695	0.707002	0.719597	0.731468	0.742601	0.752988	0.762616	0.771476	0.779559	0.786857	0.793363	0.799071	0.803973	0.808066	0.811346	0.813808	0.815451	0.816273
4.88473e-17	0.0253106	0.0505956	0.0758298	0.100988	0.126044	0.150973	0.17575	0.20035	0.224749	0.248921	0.272842	0.296489	0.319837	0.342863	0.365544	0.387857	0.40978	0.431289	0.452365	0.472985	0.493128	0.512776	0.531907	0.550502	0.568543	0.586011	0.60289	0.619161	0.634809	0.649818	0.664172	0.677858	0.690861	0.703168	0.714768	0.725647	0.735796	0.745205	0.753862	0.761761	0.768893	0.77525	0.780827	0.785618	0.789618	0.792822	0.795228	0.796834	0.797637
4.76574e-17	0.024694	0.0493631	0.0739825	0.0985274	0.122973	0.147295	0.171469	0.195469	0.219273	0.242857	0.266196	0.289266	0.312046	0.334511	0.356639	0.378409	0.399797	0.420783	0.441345	0.461462	0.481115	0.500284	0.518949	0.537091	0.554693	0.571735	0.588203	0.604078	0.619344	0.633988	0.647992	0.661344	0.674031	0.686038	0.697355	0.70797	0.717872	0.727051	0.735498	0.743204	0.750162	0.756365	0.761806	0.76648	0.770382	0.773508	0.775856	0.777422	0.778206
4.64199e-17	0.0240528	0.0480813	0.0720614	0.095969	0.11978	0.14347	0.167016	0.190394	0.21358	0.236551	0.259284	0.281755	0.303943	0.325825	0.347379	0.368583	0.389416	0.409857	0.429885	0.44948	0.468623	0.487294	0.505474	0.523145	0.540289	0.55689	0.572929	0.588392	0.603263	0.617525	0.631166	0.644172	0.656529	0.668225	0.679248	0.689587	0.699232	0.708172	0.7164	0.723906	0.730683	0.736725	0.742025	0.746577	0.750378	0.753423	0.75571	0.757236	0.757999
4.51361e-17	0.0233876	0.0467516	0.0700686	0.093315	0.116467	0.139503	0.162397	0.185129	0.207673	0.230009	0.252113	0.273963	0.295538	0.316814	0.337772	0.35839	0.378647	0.398522	0.417996	0.43705	0.455663	0.473818	0.491495	0.508677	0.525348	0.541489	0.557085	0.57212	0.586579	0.600448	0.613712	0.626357	0.638373	0.649745	0.660463	0.670516	0.679894	0.688588	0.696588	0.703886	0.710476	0.716351	0.721504	0.725931	0.729626	0.732587	0.734811	0.736294	0.737036
4.38074e-17	0.0226991	0.0453753	0.0680059	0.0905679	0.113039	0.135396	0.157617	0.179679	0.20156	0.223238	0.244691	0.265898	0.286837	0.307488	0.327829	0.347839	0.3675	0.38679	0.405691	0.424184	0.442249	0.459869	0.477026	0.493703	0.509882	0.525548	0.540685	0.555278	0.569311	0.582771	0.595645	0.607918	0.61958	0.630618	0.64102	0.650777	0.659879	0.668317	0.676081	0.683165	0.689561	0.695262	0.700264	0.70456	0.708147	0.711021	0.713179	0.714619	0.715339
4.2435e-17	0.021988	0.0439538	0.0658754	0.0877306	0.109498	0.131154	0.152679	0.17405	0.195245	0.216244	0.237026	0.257568	0.277851	0.297855	0.317558	0.336942	0.355987	0.374673	0.392982	0.410895	0.428394	0.445462	0.462082	0.478236	0.493909	0.509084	0.523747	0.537882	0.551476	0.564514	0.576984	0.588874	0.60017	0.610861	0.620938	0.63039	0.639206	0.64738	0.654901	0.661763	0.667958	0.673481	0.678326	0.682488	0.685962	0.688746	0.690837	0.692231	0.692929
4.10203e-17	0.0212549	0.0424885	0.0636792	0.0848059	0.105847	0.126782	0.147589	0.168247	0.188736	0.209035	0.229124	0.248981	0.268588	0.287925	0.306972	0.325709	0.344119	0.362182	0.37988	0.397196	0.414112	0.430611	0.446677	0.462292	0.477443	0.492112	0.506286	0.51995	0.533091	0.545695	0.557749	0.569242	0.580161	0.590497	0.600237	0.609374	0.617897	0.625797	0.633068	0.639701	0.64569	0.651029	0.655712	0.659735	0.663094	0.665785	0.667805	0.669154	0.669828
3.95647e-17	0.0205007	0.0409808	0.0614196	0.0817965	0.102091	0.122283	0.142352	0.162277	0.182039	0.201618	0.220993	0.240146	0.259058	0.277708	0.296079	0.314152	0.331908	0.34933	0.3664	0.383102	0.399418	0.415331	0.430827	0.445888	0.460501	0.47465	0.488321	0.5015	0.514174	0.526331	0.537957	0.549042	0.559574	0.569543	0.578938	0.58775	0.595971	0.603591	0.610604	0.617001	0.622778	0.627927	0.632444	0.636324	0.639564	0.642159	0.644108	0.645409	0.646059
3.80697e-17	0.019726	0.0394322	0.0590987	0.0787057	0.0982334	0.117662	0.136973	0.156145	0.17516	0.193999	0.212642	0.231072	0.249269	0.267214	0.284891	0.302281	0.319366	0.33613	0.352555	0.368626	0.384325	0.399637	0.414547	0.429039	0.4431	0.456714	0.469868	0.48255	0.494745	0.506442	0.517629	0.528296	0.53843	0.548022	0.557062	0.565541	0.573451	0.580783	0.587531	0.593687	0.599245	0.6042	0.608546	0.61228	0.615397	0.617894	0.61977	0.621021	0.621647
3.65367e-17	0.0189317	0.0378444	0.0567189	0.0755364	0.0942778	0.112924	0.131457	0.149857	0.168107	0.186187	0.20408	0.221767	0.239231	0.256454	0.273419	0.290108	0.306506	0.322595	0.338359	0.353782	0.368849	0.383545	0.397854	0.411763	0.425257	0.438323	0.450948	0.463118	0.474823	0.486049	0.496786	0.507022	0.516748	0.525954	0.53463	0.542768	0.550359	0.557396	0.563872	0.56978	0.575114	0.57987	0.584041	0.587624	0.590616	0.593013	0.594813	0.596014	0.596614
3.49673e-17	0.0181185	0.0362188	0.0542826	0.0722918	0.0902282	0.108074	0.12581	0.14342	0.160886	0.17819	0.195314	0.212241	0.228955	0.245438	0.261674	0.277647	0.29334	0.308738	0.323825	0.338586	0.353005	0.36707	0.380765	0.394076	0.406991	0.419495	0.431578	0.443226	0.454427	0.465171	0.475447	0.485244	0.494552	0.503362	0.511665	0.519454	0.526719	0.533454	0.539651	0.545306	0.550411	0.554962	0.558954	0.562384	0.565247	0.567541	0.569263	0.570412	0.570987
3.3363e-17	0.0172873	0.0345571	0.0517922	0.0689751	0.0860886	0.103115	0.120038	0.13684	0.153505	0.170014	0.186353	0.202504	0.218451	0.234178	0.249669	0.264909	0.279882	0.294573	0.308968	0.323052	0.33681	0.350229	0.363296	0.375996	0.388318	0.400249	0.411777	0.422891	0.433579	0.44383	0.453634	0.462981	0.471862	0.480268	0.488191	0.495622	0.502554	0.50898	0.514893	0.520288	0.525159	0.529501	0.53331	0.536582	0.539314	0.541503	0.543146	0.544243	0.544791
3.17255e-17	0.0164388	0.032861	0.0492502	0.0655897	0.0818632	0.0980543	0.114147	0.130124	0.14597	0.16167	0.177206	0.192565	0.207729	0.222684	0.237415	0.251907	0.266145	0.280115	0.293803	0.307196	0.320279	0.333039	0.345464	0.357542	0.369259	0.380604	0.391567	0.402135	0.412298	0.422046	0.431369	0.440257	0.448703	0.456696	0.46423	0.471296	0.477887	0.483998	0.489621	0.494751	0.499383	0.503512	0.507134	0.510246	0.512843	0.514925	0.516487	0.51753	0.518052
3.00564e-17	0.0155739	0.0311321	0.046659	0.0621389	0.0775562	0.0928955	0.108141	0.123278	0.138291	0.153164	0.167883	0.182433	0.1968	0.210968	0.224924	0.238654	0.252143	0.265378	0.278346	0.291034	0.303428	0.315517	0.327289	0.338731	0.349832	0.36058	0.370966	0.380978	0.390606	0.399841	0.408673	0.417094	0.425095	0.432668	0.439806	0.4465	0.452745	0.458534	0.463861	0.468721	0.47311	0.477021	0.480453	0.483401	0.485862	0.487833	0.489314	0.490302	0.490796
2.83573e-17	0.0146935	0.0293722	0.0440214	0.0586262	0.0731719	0.087644	0.102028	0.116309	0.130473	0.144506	0.158393	0.17212	0.185675	0.199042	0.212209	0.225162	0.237889	0.250376	0.262611	0.274581	0.286275	0.297681	0.308787	0.319582	0.330055	0.340196	0.349995	0.359441	0.368525	0.377238	0.385571	0.393516	0.401065	0.408209	0.414943	0.421259	0.427151	0.432613	0.437639	0.442224	0.446364	0.450055	0.453293	0.456074	0.458396	0.460256	0.461653	0.462585	0.463051
2.66299e-17	0.0137985	0.027583	0.0413398	0.055055	0.0687147	0.0823053	0.0958129	0.109224	0.122525	0.135703	0.148744	0.161636	0.174364	0.186918	0.199282	0.211447	0.223398	0.235124	0.246614	0.257855	0.268837	0.279548	0.289977	0.300115	0.30995	0.319474	0.328675	0.337546	0.346076	0.354259	0.362084	0.369545	0.376634	0.383344	0.389667	0.395598	0.401131	0.40626	0.41098	0.415286	0.419174	0.42264	0.425681	0.428292	0.430473	0.43222	0.433532	0.434407	0.434845
2.4876e-17	0.0128897	0.0257663	0.0386171	0.0514289	0.064189	0.0768844	0.0895024	0.10203	0.114455	0.126765	0.138948	0.15099	0.16288	0.174607	0.186157	0.19752	0.208684	0.219638	0.230371	0.240872	0.251131	0.261136	0.270879	0.280349	0.289536	0.298432	0.307028	0.315314	0.323283	0.330926	0.338236	0.345206	0.351828	0.358096	0.364003	0.369543	0.374712	0.379503	0.383912	0.387935	0.391567	0.394804	0.397644	0.400084	0.402121	0.403753	0.404978	0.405796	0.406205
2.30973e-17	0.011968	0.023924	0.0358558	0.0477516	0.0595993	0.071387	0.0831027	0.0947349	0.106272	0.117701	0.129012	0.140194	0.151234	0.162122	0.172846	0.183397	0.193763	0.203934	0.213899	0.223649	0.233174	0.242464	0.25151	0.260303	0.268833	0.277093	0.285074	0.292768	0.300167	0.307264	0.314051	0.320523	0.326671	0.332491	0.337975	0.34312	0.347919	0.352367	0.356461	0.360196	0.363568	0.366574	0.369211	0.371477	0.373368	0.374883	0.376021	0.37678	0.37716
2.12956e-17	0.0110344	0.0220577	0.0330589	0.0440267	0.0549502	0.0658183	0.0766202	0.0873449	0.0979817	0.10852	0.118949	0.129258	0.139437	0.149475	0.159363	0.169091	0.178648	0.188026	0.197214	0.206203	0.214985	0.22355	0.231891	0.239998	0.247863	0.255478	0.262837	0.26993	0.276752	0.283295	0.289553	0.29552	0.301189	0.306554	0.311611	0.316354	0.320779	0.324881	0.328655	0.332099	0.335208	0.337979	0.340411	0.342499	0.344243	0.34564	0.346689	0.347389	0.347739
1.94726e-17	0.0100898	0.0201695	0.0302289	0.0402579	0.0502463	0.0601841	0.0700613	0.079868	0.0895942	0.0992302	0.108766	0.118193	0.127501	0.13668	0.145721	0.154616	0.163355	0.17193	0.180332	0.188552	0.196582	0.204414	0.21204	0.219453	0.226645	0.233609	0.240337	0.246824	0.253061	0.259045	0.264767	0.270222	0.275406	0.280312	0.284936	0.289273	0.293319	0.29707	0.300521	0.30367	0.306513	0.309047	0.31127	0.31318	0.314775	0.316052	0.317011	0.317651	0.317972
1.76302e-17	0.00913521	0.0182612	0.0273689	0.0364489	0.0454923	0.0544898	0.0634325	0.0723114	0.0811174	0.0898417	0.0984756	0.10701	0.115437	0.123748	0.131934	0.139987	0.1479	0.155663	0.16327	0.170712	0.177982	0.185074	0.191978	0.19869	0.205201	0.211506	0.217598	0.223471	0.229118	0.234535	0.239716	0.244656	0.249349	0.253791	0.257977	0.261904	0.265567	0.268963	0.272088	0.274939	0.277513	0.279807	0.28182	0.283549	0.284993	0.286149	0.287018	0.287597	0.287887
1.57703e-17	0.00817147	0.0163347	0.0244815	0.0326036	0.040693	0.0487413	0.0567406	0.0646827	0.0725597	0.0803636	0.0880866	0.0957209	0.103259	0.110693	0.118015	0.125219	0.132297	0.139241	0.146045	0.152702	0.159206	0.165549	0.171725	0.177729	0.183553	0.189193	0.194642	0.199895	0.204947	0.209792	0.214427	0.218845	0.223043	0.227017	0.230761	0.234274	0.237551	0.240588	0.243383	0.245933	0.248236	0.250288	0.252089	0.253635	0.254927	0.255961	0.256738	0.257256	0.257516
1.38946e-17	0.00719958	0.0143919	0.0215697	0.0287259	0.0358531	0.0429442	0.049992	0.0569895	0.0639297	0.0708054	0.0776099	0.0843362	0.0909776	0.0975274	0.103979	0.110326	0.116562	0.12268	0.128675	0.13454	0.14027	0.145859	0.151301	0.15659	0.161722	0.166691	0.171492	0.17612	0.180571	0.18484	0.188924	0.192816	0.196515	0.200016	0.203315	0.20641	0.209297	0.211973	0.214436	0.216683	0.218711	0.22052	0.222106	0.223469	0.224606	0.225518	0.226202	0.226659	0.226888
1.20051e-17	0.00622051	0.0124348	0.0186365	0.0248195	0.0309774	0.0371042	0.0431936	0.0492396	0.0552359	0.0611766	0.0670558	0.0728674	0.0786056	0.0842647	0.089839	0.0953227	0.100711	0.105997	0.111177	0.116244	0.121195	0.126024	0.130725	0.135295	0.139729	0.144023	0.148171	0.15217	0.156015	0.159704	0.163232	0.166595	0.169791	0.172816	0.175667	0.178341	0.180835	0.183147	0.185275	0.187216	0.188969	0.190531	0.191902	0.193079	0.194062	0.19485	0.195441	0.195836	0.196033
1.01036e-17	0.00523525	0.0104652	0.0156847	0.0208883	0.0260709	0.0312273	0.0363522	0.0414405	0.0464871	0.0514869	0.0564348	0.0613259	0.0661553	0.070918	0.0756094	0.0802246	0.084759	0.0892081	0.0935673	0.0978324	0.101999	0.106063	0.11002	0.113866	0.117598	0.121211	0.124702	0.128068	0.131304	0.134409	0.137378	0.140208	0.142898	0.145444	0.147843	0.150093	0.152192	0.154138	0.155929	0.157563	0.159038	0.160353	0.161507	0.162498	0.163325	0.163988	0.164485	0.164817	0.164984
8.19205e-18	0.00424476	0.00848525	0.0127172	0.0169363	0.0211384	0.0253192	0.0294745	0.0336002	0.037692	0.0417458	0.0457576	0.0497233	0.053639	0.0575007	0.0613044	0.0650465	0.068723	0.0723303	0.0758648	0.0793229	0.0827012	0.0859962	0.0892045	0.0923231	0.0953487	0.0982783	0.101109	0.103838	0.106462	0.108979	0.111386	0.113682	0.115862	0.117926	0.119872	0.121696	0.123398	0.124976	0.126428	0.127753	0.128949	0.130015	0.13095	0.131754	0.132425	0.132962	0.133365	0.133635	0.133769
6.27233e-18	0.00325005	0.00649682	0.00973705	0.0129675	0.0161848	0.0193859	0.0225675	0.0257263	0.0288592	0.0319631	0.0350348	0.0380712	0.0410693	0.044026	0.0469384	0.0498035	0.0526185	0.0553805	0.0580867	0.0607344	0.063321	0.0658438	0.0683004	0.0706881	0.0730047	0.0752478	0.0774151	0.0795044	0.0815137	0.083441	0.0852842	0.0870415	0.0887112	0.0902915	0.091781	0.093178	0.0944812	0.0956893	0.096801	0.0978153	0.098731	0.0995474	0.100263	0.100879	0.101392	0.101804	0.102113	0.102319	0.102422
4.34635e-18	0.00225209	0.00450191	0.0067472	0.0089857	0.0112151	0.0134333	0.0156379	0.0178268	0.0199977	0.0221485	0.024277	0.0263811	0.0284586	0.0305074	0.0325255	0.0345109	0.0364615	0.0383754	0.0402506	0.0420854	0.0438777	0.0456259	0.0473281	0.0489827	0.050588	0.0521423	0.0536441	0.0550919	0.0564842	0.0578197	0.0590969	0.0603146	0.0614716	0.0625667	0.0635988	0.0645669	0.0654699	0.066307	0.0670774	0.0677802	0.0684148	0.0689804	0.0694767	0.0699029	0.0702588	0.0705439	0.070758	0.0709009	0.0709724
2.41604e-18	0.00125189	0.00250252	0.00375063	0.00499496	0.00623426	0.00746729	0.00869279	0.00990955	0.0111163	0.0123119	0.0134951	0.0146647	0.0158195	0.0169584	0.0180802	0.0191839	0.0202682	0.0213321	0.0223745	0.0233944	0.0243907	0.0253625	0.0263087	0.0272284	0.0281208	0.0289848	0.0298196	0.0306244	0.0313984	0.0321407	0.0328507	0.0335276	0.0341708	0.0347795	0.0353532	0.0358913	0.0363933	0.0368587	0.0372869	0.0376776	0.0380303	0.0383448	0.0386206	0.0388576	0.0390554	0.0392139	0.0393329	0.0394123	0.039452
4.83329e-19	0.00025044	0.000500628	0.000750312	0.000999241	0.00124716	0.00149383	0.00173899	0.0019824	0.00222382	0.00246299	0.00269969	0.00293367	0.00316469	0.00339253	0.00361695	0.00383773	0.00405464	0.00426748	0.00447601	0.00468004	0.00487936	0.00507376	0.00526305	0.00544705	0.00562556	0.0057984	0.00596541	0.00612641	0.00628124	0.00642975	0.00657178	0.00670719	0.00683586	0.00695763	0.00707241	0.00718006	0.00728048	0.00737357	0.00745924	0.00753739	0.00760796	0.00767087	0.00772605	0.00777345	0.00781302	0.00784473	0.00786854	0.00788443	0.00789237
-1.44987e-18	-0.000751258	-0.00150176	-0.00225075	-0.00299747	-0.00374118	-0.00448112	-0.00521654	-0.00594672	-0.0066709	-0.00738837	-0.0080984	-0.00880027	-0.00949329	-0.0101767	-0.0108499	-0.0115122	-0.0121629	-0.0128014	-0.0134269	-0.014039	-0.0146369	-0.01522	-0.0157878	-0.0163398	-0.0168753	-0.0173938	-0.0178947	-0.0183777	-0.0188422	-0.0192876	-0.0197137	-0.0201199	-0.0205059	-0.0208712	-0.0212155	-0.0215384	-0.0218396	-0.0221189	-0.0223759	-0.0226103	-0.022822	-0.0230107	-0.0231762	-0.0233184	-0.0234371	-0.0235322	-0.0236037	-0.0236513	-0.0236752
-3.38162e-18	-0.00175221	-0.00350265	-0.00524957	-0.0069912	-0.00872579	-0.0104516	-0.0121669	-0.0138699	-0.015559	-0.0172324	-0.0188884	-0.0205254	-0.0221418	-0.0237359	-0.025306	-0.0268507	-0.0283684	-0.0298574	-0.0313165	-0.032744	-0.0341385	-0.0354986	-0.036823	-0.0381103	-0.0393593	-0.0405686	-0.041737	-0.0428635	-0.0439468	-0.0449858	-0.0459795	-0.046927	-0.0478271	-0.0486792	-0.0494822	-0.0502354	-0.050938	-0.0515893	-0.0521886	-0.0527355	-0.0532292	-0.0536693	-0.0540554	-0.054387	-0.0546639	-0.0548858	-0.0550523	-0.0551635	-0.0552191
-5.31e-18	-0.00275141	-0.00550005	-0.00824315	-0.010978	-0.0137017	-0.0164117	-0.0191051	-0.0217793	-0.0244315	-0.0270592	-0.0296596	-0.0322302	-0.0347682	-0.0372713	-0.0397369	-0.0421624	-0.0445455	-0.0468838	-0.0491748	-0.0514163	-0.0536061	-0.0557418	-0.0578215	-0.0598429	-0.061804	-0.063703	-0.0655378	-0.0673066	-0.0690076	-0.0706391	-0.0721995	-0.0736872	-0.0751008	-0.0764386	-0.0776996	-0.0788823	-0.0799855	-0.0810083	-0.0819494	-0.0828081	-0.0835833	-0.0842744	-0.0848807	-0.0854014	-0.0858362	-0.0861846	-0.0864461	-0.0866207	-0.086708
-7.23309e-18	-0.00374787	-0.00749197	-0.0112285	-0.0149538	-0.018664	-0.0223554	-0.0260242	-0.0296669	-0.0332797	-0.036859	-0.0404012	-0.0439027	-0.04736	-0.0507696	-0.0541281	-0.0574321	-0.0606783	-0.0638633	-0.0669841	-0.0700374	-0.0730202	-0.0759295	-0.0787623	-0.0815158	-0.0841872	-0.0867739	-0.0892731	-0.0916825	-0.0939996	-0.096222	-0.0983475	-0.100374	-0.102299	-0.104122	-0.10584	-0.107451	-0.108953	-0.110346	-0.111628	-0.112798	-0.113854	-0.114796	-0.115621	-0.116331	-0.116923	-0.117397	-0.117754	-0.117991	-0.11811
-9.14896e-18	-0.0047406	-0.00947642	-0.0142027	-0.0189147	-0.0236076	-0.0282768	-0.0329175	-0.037525	-0.0420948	-0.0466221	-0.0511026	-0.0555316	-0.0599046	-0.0642173	-0.0684654	-0.0726446	-0.0767506	-0.0807793	-0.0847266	-0.0885887	-0.0923616	-0.0960414	-0.0996246	-0.103107	-0.106486	-0.109758	-0.11292	-0.115967	-0.118898	-0.121709	-0.124398	-0.126961	-0.129396	-0.131701	-0.133874	-0.135912	-0.137813	-0.139575	-0.141196	-0.142676	-0.144011	-0.145202	-0.146247	-0.147144	-0.147893	-0.148493	-0.148944	-0.149245	-0.149395
-1.10557e-17	-0.00572859	-0.0114514	-0.0171627	-0.0228567	-0.0285277	-0.03417	-0.0397779	-0.0453457	-0.0508678	-0.0563388	-0.061753	-0.067105	-0.0723895	-0.077601	-0.0827345	-0.0877846	-0.0927463	-0.0976147	-0.102385	-0.107052	-0.111611	-0.116058	-0.120388	-0.124596	-0.12868	-0.132633	-0.136453	-0.140136	-0.143678	-0.147075	-0.150324	-0.153421	-0.156364	-0.15915	-0.161775	-0.164237	-0.166534	-0.168664	-0.170623	-0.172411	-0.174025	-0.175464	-0.176726	-0.177811	-0.178716	-0.179441	-0.179986	-0.180349	-0.180531
-1.29515e-17	-0.00671088	-0.013415	-0.0201056	-0.026776	-0.0334194	-0.0400292	-0.0465986	-0.0531212	-0.0595902	-0.0659993	-0.0723418	-0.0786116	-0.0848022	-0.0909074	-0.096921	-0.102837	-0.10865	-0.114353	-0.119941	-0.125408	-0.130749	-0.135958	-0.141031	-0.145961	-0.150744	-0.155376	-0.159851	-0.164165	-0.168314	-0.172294	-0.1761	-0.179728	-0.183176	-0.186439	-0.189515	-0.192399	-0.19509	-0.197585	-0.19988	-0.201975	-0.203866	-0.205551	-0.20703	-0.2083	-0.20936	-0.21021	-0.210848	-0.211274	-0.211487
-1.48343e-17	-0.00768648	-0.0153652	-0.0230285	-0.0306686	-0.0382778	-0.0458484	-0.0533729	-0.0608437	-0.0682532	-0.0755939	-0.0828586	-0.0900398	-0.0971303	-0.104123	-0.111011	-0.117787	-0.124445	-0.130977	-0.137377	-0.143639	-0.149757	-0.155723	-0.161533	-0.16718	-0.172659	-0.177964	-0.18309	-0.188031	-0.192783	-0.197341	-0.2017	-0.205856	-0.209805	-0.213543	-0.217065	-0.22037	-0.223452	-0.226309	-0.228938	-0.231337	-0.233503	-0.235433	-0.237127	-0.238582	-0.239796	-0.24077	-0.2415	-0.241988	-0.242232
-1.67023e-17	-0.00865442	-0.0173001	-0.0259284	-0.0345306	-0.043098	-0.051622	-0.060094	-0.0685056	-0.0768481	-0.0851133	-0.0932927	-0.101378	-0.109362	-0.117235	-0.12499	-0.13262	-0.140116	-0.14747	-0.154677	-0.161727	-0.168615	-0.175333	-0.181874	-0.188233	-0.194401	-0.200374	-0.206146	-0.211709	-0.21706	-0.222192	-0.2271	-0.231779	-0.236225	-0.240434	-0.2444	-0.24812	-0.25159	-0.254807	-0.257768	-0.260468	-0.262907	-0.265081	-0.266988	-0.268626	-0.269993	-0.271089	-0.271912	-0.272461	-0.272735
-1.85537e-17	-0.00961373	-0.0192178	-0.0288025	-0.0383582	-0.0478752	-0.0573441	-0.0667552	-0.0760991	-0.0853664	-0.0945478	-0.103634	-0.112616	-0.121484	-0.13023	-0.138845	-0.14732	-0.155647	-0.163817	-0.171822	-0.179654	-0.187305	-0.194768	-0.202034	-0.209098	-0.21595	-0.222585	-0.228996	-0.235176	-0.24112	-0.246821	-0.252273	-0.257471	-0.26241	-0.267085	-0.271491	-0.275623	-0.279478	-0.283052	-0.28634	-0.28934	-0.292049	-0.294464	-0.296582	-0.298402	-0.299921	-0.301138	-0.302052	-0.302662	-0.302967
-2.03866e-17	-0.0105635	-0.0211163	-0.0316478	-0.0421475	-0.0526048	-0.0630091	-0.0733499	-0.0836169	-0.0937997	-0.103888	-0.113872	-0.123741	-0.133485	-0.143095	-0.152561	-0.161874	-0.171023	-0.18	-0.188796	-0.197402	-0.205809	-0.214009	-0.221993	-0.229754	-0.237283	-0.244574	-0.251618	-0.258409	-0.26494	-0.271204	-0.277195	-0.282906	-0.288333	-0.29347	-0.298311	-0.302852	-0.307087	-0.311014	-0.314627	-0.317924	-0.3209	-0.323554	-0.325881	-0.327881	-0.32955	-0.330887	-0.331891	-0.332562	-0.332897
-2.21992e-17	-0.0115027	-0.0229937	-0.0344616	-0.0458949	-0.0572819	-0.0686112	-0.0798714	-0.0910512	-0.102139	-0.113125	-0.123996	-0.134743	-0.145353	-0.155818	-0.166126	-0.176266	-0.186229	-0.196004	-0.205582	-0.214953	-0.224107	-0.233036	-0.241731	-0.250181	-0.25838	-0.266319	-0.27399	-0.281384	-0.288496	-0.295317	-0.30184	-0.30806	-0.313969	-0.319562	-0.324834	-0.329778	-0.334391	-0.338666	-0.342601	-0.34619	-0.349432	-0.352321	-0.354855	-0.357032	-0.35885	-0.360306	-0.3614	-0.36213	-0.362495
-2.39896e-17	-0.0124304	-0.0248482	-0.0372411	-0.0495964	-0.0619019	-0.0741449	-0.0863133	-0.0983949	-0.110377	-0.122249	-0.133997	-0.14561	-0.157077	-0.168385	-0.179524	-0.190482	-0.201249	-0.211812	-0.222163	-0.23229	-0.242183	-0.251832	-0.261227	-0.270359	-0.27922	-0.287799	-0.296088	-0.304079	-0.311764	-0.319135	-0.326185	-0.332906	-0.339292	-0.345336	-0.351033	-0.356376	-0.36136	-0.365981	-0.370233	-0.374112	-0.377614	-0.380737	-0.383476	-0.385828	-0.387793	-0.389366	-0.390548	-0.391337	-0.391731
-2.57562e-17	-0.0133457	-0.026678	-0.0399834	-0.0532486	-0.0664601	-0.0796048	-0.0926692	-0.10564	-0.118505	-0.131251	-0.143864	-0.156332	-0.168643	-0.180785	-0.192744	-0.204509	-0.216068	-0.22741	-0.238522	-0.249395	-0.260016	-0.270376	-0.280463	-0.290268	-0.299781	-0.308991	-0.317891	-0.326471	-0.334721	-0.342635	-0.350204	-0.35742	-0.364276	-0.370766	-0.376882	-0.382619	-0.38797	-0.392931	-0.397496	-0.401661	-0.405421	-0.408773	-0.411714	-0.41424	-0.416349	-0.418038	-0.419307	-0.420154	-0.420577
-2.7497e-17	-0.0142478	-0.0284812	-0.0426859	-0.0568477	-0.0709522	-0.0849852	-0.0989327	-0.112781	-0.126515	-0.140122	-0.153588	-0.166899	-0.180042	-0.193004	-0.205771	-0.218332	-0.230672	-0.24278	-0.254644	-0.266251	-0.277591	-0.28865	-0.29942	-0.309887	-0.320043	-0.329876	-0.339377	-0.348537	-0.357345	-0.365794	-0.373874	-0.381578	-0.388898	-0.395826	-0.402355	-0.40848	-0.414193	-0.419489	-0.424362	-0.428809	-0.432823	-0.436402	-0.439541	-0.442238	-0.44449	-0.446294	-0.447648	-0.448552	-0.449004
-2.92105e-17	-0.0151356	-0.0302559	-0.0453458	-0.0603901	-0.0753735	-0.090281	-0.105098	-0.119808	-0.134399	-0.148853	-0.163158	-0.177299	-0.191261	-0.205031	-0.218594	-0.231937	-0.245046	-0.257909	-0.270512	-0.282843	-0.294889	-0.306637	-0.318078	-0.329197	-0.339986	-0.350432	-0.360525	-0.370255	-0.379613	-0.388588	-0.397172	-0.405356	-0.413131	-0.420491	-0.427428	-0.433934	-0.440003	-0.445629	-0.450806	-0.45553	-0.459794	-0.463596	-0.466931	-0.469796	-0.472188	-0.474104	-0.475543	-0.476503	-0.476983
-3.08948e-17	-0.0160083	-0.0320006	-0.0479606	-0.0638723	-0.0797197	-0.0954868	-0.111158	-0.126717	-0.142148	-0.157437	-0.172566	-0.187522	-0.20229	-0.216853	-0.231198	-0.245311	-0.259176	-0.272781	-0.28611	-0.299152	-0.311892	-0.324319	-0.336419	-0.34818	-0.35959	-0.370638	-0.381314	-0.391605	-0.401502	-0.410995	-0.420073	-0.428729	-0.436953	-0.444738	-0.452074	-0.458955	-0.465374	-0.471325	-0.4768	-0.481796	-0.486307	-0.490328	-0.493855	-0.496885	-0.499415	-0.501442	-0.502963	-0.503979	-0.504487
-3.25483e-17	-0.0168651	-0.0337133	-0.0505275	-0.0672908	-0.0839864	-0.100597	-0.117107	-0.133499	-0.149756	-0.165863	-0.181802	-0.197559	-0.213116	-0.228459	-0.243572	-0.25844	-0.273048	-0.28738	-0.301423	-0.315163	-0.328585	-0.341677	-0.354424	-0.366815	-0.378836	-0.390476	-0.401722	-0.412564	-0.422991	-0.432992	-0.442556	-0.451675	-0.46034	-0.468541	-0.47627	-0.483519	-0.490282	-0.496551	-0.50232	-0.507583	-0.512335	-0.516571	-0.520287	-0.523479	-0.526144	-0.528279	-0.529883	-0.530953	-0.531488
-3.41694e-17	-0.0177051	-0.0353924	-0.053044	-0.0706423	-0.0881694	-0.105608	-0.12294	-0.140148	-0.157215	-0.174124	-0.190857	-0.207398	-0.223731	-0.239838	-0.255704	-0.271312	-0.286647	-0.301693	-0.316436	-0.33086	-0.344951	-0.358694	-0.372076	-0.385084	-0.397704	-0.409923	-0.42173	-0.433112	-0.444058	-0.454557	-0.464598	-0.474171	-0.483267	-0.491877	-0.49999	-0.507601	-0.5147	-0.521282	-0.527338	-0.532863	-0.537852	-0.542299	-0.5462	-0.549551	-0.552349	-0.554591	-0.556274	-0.557397	-0.557959
-3.57564e-17	-0.0185274	-0.0370362	-0.0555077	-0.0739233	-0.0922645	-0.110513	-0.12865	-0.146657	-0.164517	-0.182211	-0.199722	-0.217031	-0.234122	-0.250977	-0.26758	-0.283913	-0.29996	-0.315706	-0.331133	-0.346227	-0.360972	-0.375354	-0.389358	-0.40297	-0.416176	-0.428963	-0.441318	-0.453228	-0.464683	-0.475669	-0.486177	-0.496195	-0.505713	-0.514722	-0.523213	-0.531177	-0.538606	-0.545493	-0.551831	-0.557612	-0.562833	-0.567487	-0.571569	-0.575076	-0.578003	-0.580349	-0.58211	-0.583286	-0.583874
-3.73078e-17	-0.0193313	-0.0386431	-0.057916	-0.0771306	-0.0962676	-0.115308	-0.134231	-0.15302	-0.171655	-0.190117	-0.208387	-0.226448	-0.24428	-0.261867	-0.27919	-0.296231	-0.312975	-0.329403	-0.3455	-0.361249	-0.376634	-0.39164	-0.406251	-0.420454	-0.434233	-0.447574	-0.460465	-0.472893	-0.484844	-0.496307	-0.507271	-0.517723	-0.527655	-0.537055	-0.545914	-0.554223	-0.561975	-0.569161	-0.575773	-0.581806	-0.587253	-0.592108	-0.596368	-0.600027	-0.603082	-0.605529	-0.607367	-0.608593	-0.609206
-3.8822e-17	-0.0201159	-0.0402115	-0.0602667	-0.0802611	-0.100175	-0.119988	-0.139679	-0.159231	-0.178622	-0.197833	-0.216845	-0.235638	-0.254195	-0.272495	-0.290521	-0.308254	-0.325678	-0.342773	-0.359523	-0.375911	-0.39192	-0.407535	-0.422739	-0.437518	-0.451857	-0.46574	-0.479154	-0.492086	-0.504522	-0.516451	-0.527859	-0.538736	-0.54907	-0.558852	-0.568071	-0.576717	-0.584784	-0.592261	-0.599142	-0.605419	-0.611087	-0.61614	-0.620572	-0.62438	-0.627559	-0.630105	-0.632018	-0.633294	-0.633932
-4.02975e-17	-0.0208804	-0.0417398	-0.0625572	-0.0833116	-0.103982	-0.124548	-0.144988	-0.165283	-0.185411	-0.205352	-0.225086	-0.244594	-0.263856	-0.282852	-0.301563	-0.31997	-0.338055	-0.3558	-0.373187	-0.390198	-0.406816	-0.423024	-0.438806	-0.454147	-0.46903	-0.483441	-0.497365	-0.510789	-0.523698	-0.536079	-0.547921	-0.559212	-0.569939	-0.580092	-0.589661	-0.598637	-0.607009	-0.614771	-0.621913	-0.628429	-0.634313	-0.639557	-0.644158	-0.64811	-0.65141	-0.654054	-0.656039	-0.657363	-0.658026
-4.17329e-17	-0.0216241	-0.0432265	-0.0647854	-0.086279	-0.107686	-0.128984	-0.150152	-0.17117	-0.192015	-0.212666	-0.233104	-0.253306	-0.273254	-0.292926	-0.312304	-0.331367	-0.350096	-0.368473	-0.386479	-0.404096	-0.421306	-0.438091	-0.454436	-0.470323	-0.485736	-0.50066	-0.515081	-0.528982	-0.542351	-0.555174	-0.567437	-0.57913	-0.590239	-0.600754	-0.610664	-0.619959	-0.62863	-0.636668	-0.644065	-0.650813	-0.656906	-0.662337	-0.667102	-0.671195	-0.674612	-0.67735	-0.679406	-0.680777	-0.681463
-4.31266e-17	-0.0223463	-0.0446701	-0.066949	-0.0891604	-0.111282	-0.133292	-0.155167	-0.176886	-0.198427	-0.219768	-0.240888	-0.261766	-0.28238	-0.302709	-0.322734	-0.342433	-0.361788	-0.380779	-0.399386	-0.417591	-0.435376	-0.452722	-0.469612	-0.48603	-0.501958	-0.517381	-0.532282	-0.546648	-0.560463	-0.573714	-0.586388	-0.598471	-0.609951	-0.620817	-0.631058	-0.640663	-0.649624	-0.65793	-0.665574	-0.672548	-0.678844	-0.684457	-0.689381	-0.69361	-0.697142	-0.699971	-0.702095	-0.703513	-0.704222
-4.44773e-17	-0.0230462	-0.0460692	-0.0690458	-0.0919529	-0.114767	-0.137466	-0.160027	-0.182426	-0.204642	-0.226652	-0.248433	-0.269964	-0.291224	-0.31219	-0.332842	-0.353159	-0.37312	-0.392705	-0.411895	-0.43067	-0.449012	-0.466901	-0.484321	-0.501253	-0.517679	-0.533585	-0.548954	-0.563769	-0.578017	-0.591683	-0.604754	-0.617215	-0.629055	-0.640261	-0.650823	-0.660729	-0.66997	-0.678537	-0.68642	-0.693612	-0.700106	-0.705895	-0.710972	-0.715335	-0.718976	-0.721894	-0.724085	-0.725547	-0.726278
-4.57837e-17	-0.0237231	-0.0474224	-0.0710739	-0.0946538	-0.118138	-0.141504	-0.164727	-0.187785	-0.210653	-0.233309	-0.25573	-0.277894	-0.299778	-0.32136	-0.342618	-0.363532	-0.384079	-0.40424	-0.423993	-0.44332	-0.462201	-0.480615	-0.498546	-0.515975	-0.532885	-0.549258	-0.565078	-0.580329	-0.594995	-0.609062	-0.622517	-0.635344	-0.647531	-0.659067	-0.669939	-0.680136	-0.689649	-0.698467	-0.706582	-0.713985	-0.72067	-0.726628	-0.731855	-0.736346	-0.740094	-0.743098	-0.745353	-0.746858	-0.747611
-4.70445e-17	-0.0243764	-0.0487283	-0.0730311	-0.0972603	-0.121392	-0.145401	-0.169263	-0.192956	-0.216454	-0.239734	-0.262772	-0.285546	-0.308033	-0.330209	-0.352053	-0.373542	-0.394656	-0.415372	-0.435669	-0.455528	-0.474928	-0.49385	-0.512275	-0.530184	-0.547559	-0.564383	-0.580638	-0.596309	-0.61138	-0.625834	-0.639659	-0.65284	-0.665363	-0.677216	-0.688387	-0.698865	-0.70864	-0.717701	-0.726039	-0.733646	-0.740515	-0.746638	-0.752009	-0.756623	-0.760475	-0.763561	-0.765878	-0.767425	-0.768198
-4.82584e-17	-0.0250054	-0.0499856	-0.0749154	-0.0997699	-0.124524	-0.149152	-0.173631	-0.197934	-0.222039	-0.245919	-0.269552	-0.292914	-0.315981	-0.338729	-0.361137	-0.383181	-0.404839	-0.426089	-0.446911	-0.467282	-0.487183	-0.506593	-0.525493	-0.543864	-0.561688	-0.578945	-0.59562	-0.611696	-0.627155	-0.641983	-0.656164	-0.669685	-0.682531	-0.69469	-0.706149	-0.716898	-0.726925	-0.736219	-0.744773	-0.752576	-0.759622	-0.765903	-0.771413	-0.776145	-0.780097	-0.783263	-0.78564	-0.787226	-0.78802
-4.94241e-17	-0.0256094	-0.0511931	-0.0767252	-0.10218	-0.127532	-0.152755	-0.177825	-0.202716	-0.227402	-0.25186	-0.276064	-0.29999	-0.323614	-0.346912	-0.369861	-0.392437	-0.414618	-0.436382	-0.457706	-0.47857	-0.498951	-0.518831	-0.538187	-0.557002	-0.575256	-0.592931	-0.610009	-0.626472	-0.642305	-0.657491	-0.672015	-0.685862	-0.699019	-0.711471	-0.723208	-0.734216	-0.744485	-0.754004	-0.762764	-0.770756	-0.777972	-0.784405	-0.790047	-0.794895	-0.798941	-0.802184	-0.804618	-0.806243	-0.807056
-5.05406e-17	-0.0261879	-0.0523495	-0.0784584	-0.104488	-0.130413	-0.156206	-0.181842	-0.207295	-0.232539	-0.25755	-0.2823	-0.306767	-0.330924	-0.354749	-0.378216	-0.401302	-0.423985	-0.44624	-0.468046	-0.489381	-0.510223	-0.530551	-0.550345	-0.569585	-0.588251	-0.606325	-0.623789	-0.640624	-0.656815	-0.672344	-0.687196	-0.701356	-0.714809	-0.727544	-0.739545	-0.750802	-0.761303	-0.771037	-0.779995	-0.788168	-0.795547	-0.802124	-0.807895	-0.812851	-0.81699	-0.820305	-0.822795	-0.824456	-0.825287
-5.16067e-17	-0.0267404	-0.0534538	-0.0801134	-0.106692	-0.133164	-0.159501	-0.185678	-0.211668	-0.237445	-0.262982	-0.288255	-0.313238	-0.337905	-0.362232	-0.386194	-0.409768	-0.432928	-0.455653	-0.477919	-0.499704	-0.520986	-0.541743	-0.561954	-0.5816	-0.60066	-0.619115	-0.636947	-0.654138	-0.67067	-0.686526	-0.701691	-0.71615	-0.729888	-0.742891	-0.755145	-0.76664	-0.777362	-0.787302	-0.796448	-0.804793	-0.812328	-0.819045	-0.824937	-0.829998	-0.834223	-0.837609	-0.840151	-0.841847	-0.842696
-5.26214e-17	-0.0272661	-0.0545048	-0.0816886	-0.10879	-0.135782	-0.162637	-0.189329	-0.21583	-0.242113	-0.268153	-0.293923	-0.319397	-0.344549	-0.369354	-0.393787	-0.417824	-0.44144	-0.464612	-0.487316	-0.509529	-0.531229	-0.552394	-0.573003	-0.593035	-0.61247	-0.631288	-0.649471	-0.666999	-0.683856	-0.700024	-0.715488	-0.730231	-0.744239	-0.757497	-0.769993	-0.781713	-0.792646	-0.802781	-0.812108	-0.820617	-0.8283	-0.835148	-0.841156	-0.846317	-0.850626	-0.854078	-0.85667	-0.858399	-0.859265
-5.35836e-17	-0.0277647	-0.0555014	-0.0831823	-0.110779	-0.138265	-0.165611	-0.192791	-0.219776	-0.246541	-0.273056	-0.299297	-0.325237	-0.350849	-0.376108	-0.400988	-0.425464	-0.449512	-0.473108	-0.496227	-0.518846	-0.540943	-0.562495	-0.583481	-0.603879	-0.623669	-0.642832	-0.661347	-0.679196	-0.696361	-0.712825	-0.728571	-0.743584	-0.757848	-0.771348	-0.784073	-0.796007	-0.80714	-0.817461	-0.826958	-0.835623	-0.843446	-0.85042	-0.856537	-0.861792	-0.86618	-0.869695	-0.872335	-0.874096	-0.874977
-5.44924e-17	-0.0282356	-0.0564428	-0.0845931	-0.112658	-0.14061	-0.16842	-0.196061	-0.223504	-0.250722	-0.277688	-0.304374	-0.330753	-0.3568	-0.382487	-0.407789	-0.432681	-0.457136	-0.481132	-0.504643	-0.527646	-0.550118	-0.572035	-0.593377	-0.614121	-0.634247	-0.653734	-0.672563	-0.690715	-0.708172	-0.724915	-0.740928	-0.756195	-0.770701	-0.784431	-0.797371	-0.809508	-0.82083	-0.831325	-0.840984	-0.849795	-0.857751	-0.864843	-0.871065	-0.876409	-0.880871	-0.884446	-0.88713	-0.888921	-0.889817
-5.53469e-17	-0.0286784	-0.0573279	-0.0859196	-0.114425	-0.142815	-0.171061	-0.199135	-0.227009	-0.254653	-0.282042	-0.309146	-0.33594	-0.362395	-0.388485	-0.414184	-0.439465	-0.464305	-0.488676	-0.512556	-0.53592	-0.558744	-0.581005	-0.602682	-0.623751	-0.644193	-0.663986	-0.68311	-0.701546	-0.719276	-0.736282	-0.752546	-0.768053	-0.782786	-0.796731	-0.809874	-0.822202	-0.833701	-0.844361	-0.854171	-0.863121	-0.871201	-0.878405	-0.884724	-0.890152	-0.894684	-0.898314	-0.901041	-0.90286	-0.90377
-5.61462e-17	-0.0290925	-0.0581558	-0.0871605	-0.116077	-0.144877	-0.173532	-0.202011	-0.230287	-0.258331	-0.286115	-0.313611	-0.340791	-0.367628	-0.394095	-0.420165	-0.445812	-0.47101	-0.495734	-0.519959	-0.54366	-0.566813	-0.589396	-0.611386	-0.632759	-0.653496	-0.673575	-0.692975	-0.711678	-0.729664	-0.746915	-0.763415	-0.779145	-0.794091	-0.808238	-0.82157	-0.834076	-0.845741	-0.856555	-0.866507	-0.875586	-0.883783	-0.891091	-0.897501	-0.903007	-0.907605	-0.911288	-0.914054	-0.915899	-0.916822
-5.68896e-17	-0.0294777	-0.0589257	-0.0883144	-0.117614	-0.146796	-0.175829	-0.204686	-0.233336	-0.261751	-0.289903	-0.317763	-0.345303	-0.372496	-0.399313	-0.425728	-0.451714	-0.477246	-0.502297	-0.526843	-0.550857	-0.574318	-0.597199	-0.61948	-0.641137	-0.662148	-0.682493	-0.70215	-0.7211	-0.739324	-0.756804	-0.773522	-0.789461	-0.804605	-0.818938	-0.832448	-0.845119	-0.856939	-0.867896	-0.877979	-0.887178	-0.895484	-0.902888	-0.909383	-0.914963	-0.919621	-0.923353	-0.926155	-0.928025	-0.92896
-5.75762e-17	-0.0298335	-0.0596369	-0.0893804	-0.119034	-0.148567	-0.177951	-0.207156	-0.236152	-0.264911	-0.293402	-0.321599	-0.349471	-0.376991	-0.404132	-0.430866	-0.457166	-0.483006	-0.50836	-0.533201	-0.557506	-0.581249	-0.604407	-0.626957	-0.648875	-0.67014	-0.69073	-0.710625	-0.729804	-0.748248	-0.765939	-0.782858	-0.798989	-0.814316	-0.828823	-0.842495	-0.855319	-0.867282	-0.878371	-0.888576	-0.897886	-0.906292	-0.913786	-0.920359	-0.926006	-0.93072	-0.934497	-0.937334	-0.939226	-0.940173
-5.82055e-17	-0.0301595	-0.0602887	-0.0903572	-0.120335	-0.150191	-0.179896	-0.20942	-0.238733	-0.267806	-0.296609	-0.325113	-0.35329	-0.381112	-0.408549	-0.435575	-0.462163	-0.488285	-0.513916	-0.539029	-0.563599	-0.587602	-0.611013	-0.633809	-0.655967	-0.677464	-0.698279	-0.718391	-0.73778	-0.756425	-0.774309	-0.791414	-0.807721	-0.823216	-0.837881	-0.851703	-0.864667	-0.87676	-0.887971	-0.898287	-0.907699	-0.916197	-0.923772	-0.930418	-0.936126	-0.940892	-0.944711	-0.947578	-0.949491	-0.950448
-5.87767e-17	-0.0304555	-0.0608804	-0.0912439	-0.121516	-0.151665	-0.181662	-0.211475	-0.241076	-0.270434	-0.29952	-0.328304	-0.356757	-0.384852	-0.412559	-0.43985	-0.466698	-0.493077	-0.518959	-0.544319	-0.56913	-0.593369	-0.617009	-0.640029	-0.662404	-0.684113	-0.705132	-0.725441	-0.74502	-0.763849	-0.781908	-0.799181	-0.815648	-0.831295	-0.846104	-0.860061	-0.873152	-0.885364	-0.896685	-0.907103	-0.916607	-0.925189	-0.932838	-0.939549	-0.945313	-0.950126	-0.953982	-0.956877	-0.958809	-0.959775
-5.92893e-17	-0.0307212	-0.0614114	-0.0920398	-0.122575	-0.152988	-0.183246	-0.21332	-0.243179	-0.272793	-0.302132	-0.331167	-0.359869	-0.388208	-0.416157	-0.443686	-0.470769	-0.497378	-0.523485	-0.549066	-0.574094	-0.598544	-0.622391	-0.645611	-0.668182	-0.690079	-0.711282	-0.731768	-0.751518	-0.770511	-0.788728	-0.806151	-0.822762	-0.838545	-0.853483	-0.867562	-0.880768	-0.893086	-0.904506	-0.915014	-0.924602	-0.933258	-0.940974	-0.947743	-0.953558	-0.958413	-0.962302	-0.965223	-0.967172	-0.968146
-5.97429e-17	-0.0309562	-0.0618811	-0.0927438	-0.123513	-0.154158	-0.184648	-0.214952	-0.245039	-0.274879	-0.304443	-0.333701	-0.362622	-0.391178	-0.41934	-0.44708	-0.47437	-0.501182	-0.52749	-0.553266	-0.578486	-0.603122	-0.627152	-0.65055	-0.673293	-0.695358	-0.716723	-0.737366	-0.757267	-0.776405	-0.794761	-0.812318	-0.829056	-0.844959	-0.860012	-0.874199	-0.887505	-0.899918	-0.911425	-0.922014	-0.931674	-0.940397	-0.948172	-0.954993	-0.960852	-0.965744	-0.969663	-0.972606	-0.97457	-0.975552
-6.01369e-17	-0.0311603	-0.0622892	-0.0933554	-0.124328	-0.155175	-0.185865	-0.216369	-0.246655	-0.276692	-0.306451	-0.335901	-0.365013	-0.393758	-0.422106	-0.450029	-0.477498	-0.504487	-0.530968	-0.556915	-0.5823	-0.6071	-0.631288	-0.65484	-0.677733	-0.699944	-0.721449	-0.742229	-0.762261	-0.781525	-0.800003	-0.817675	-0.834523	-0.850532	-0.865684	-0.879964	-0.893358	-0.905853	-0.917435	-0.928094	-0.937818	-0.946598	-0.954425	-0.961291	-0.967189	-0.972113	-0.976058	-0.97902	-0.980997	-0.981986
-6.04709e-17	-0.0313334	-0.0626352	-0.093874	-0.125018	-0.156037	-0.186898	-0.217571	-0.248025	-0.278229	-0.308153	-0.337767	-0.367041	-0.395945	-0.42445	-0.452528	-0.480151	-0.50729	-0.533918	-0.560008	-0.585535	-0.610472	-0.634794	-0.658477	-0.681498	-0.703832	-0.725457	-0.746351	-0.766495	-0.785866	-0.804446	-0.822216	-0.839159	-0.855256	-0.870492	-0.884852	-0.89832	-0.910884	-0.922531	-0.933249	-0.943028	-0.951856	-0.959727	-0.966631	-0.972561	-0.977513	-0.98148	-0.984458	-0.986446	-0.98744
-6.07446e-17	-0.0314752	-0.0629188	-0.094299	-0.125584	-0.156743	-0.187744	-0.218556	-0.249148	-0.279489	-0.309548	-0.339296	-0.368702	-0.397737	-0.426372	-0.454577	-0.482324	-0.509586	-0.536335	-0.562543	-0.588186	-0.613236	-0.637668	-0.661458	-0.684583	-0.707018	-0.728741	-0.74973	-0.769965	-0.789424	-0.808088	-0.825939	-0.842958	-0.859128	-0.874433	-0.888858	-0.902387	-0.915008	-0.926708	-0.937474	-0.947297	-0.956166	-0.964071	-0.971007	-0.976964	-0.981938	-0.985923	-0.988915	-0.990912	-0.99191
-6.09579e-17	-0.0315857	-0.0631396	-0.0946299	-0.126025	-0.157293	-0.188403	-0.219323	-0.250022	-0.28047	-0.310635	-0.340487	-0.369996	-0.399133	-0.427868	-0.456172	-0.484017	-0.511375	-0.538217	-0.564518	-0.59025	-0.615388	-0.639906	-0.66378	-0.686986	-0.709499	-0.731299	-0.752362	-0.772667	-0.792195	-0.810924	-0.828838	-0.845916	-0.862143	-0.877502	-0.891977	-0.905554	-0.91822	-0.92996	-0.940765	-0.950622	-0.959522	-0.967455	-0.974415	-0.980393	-0.985384	-0.989383	-0.992386	-0.99439	-0.995392
-6.11103e-17	-0.0316647	-0.0632975	-0.0948666	-0.12634	-0.157686	-0.188874	-0.219871	-0.250647	-0.281171	-0.311412	-0.341338	-0.370922	-0.400131	-0.428938	-0.457313	-0.485228	-0.512654	-0.539563	-0.56593	-0.591726	-0.616927	-0.641506	-0.66544	-0.688704	-0.711274	-0.733128	-0.754243	-0.774599	-0.794176	-0.812952	-0.83091	-0.848032	-0.864299	-0.879696	-0.894208	-0.907819	-0.920516	-0.932286	-0.943117	-0.952999	-0.961921	-0.969875	-0.976852	-0.982845	-0.987849	-0.991858	-0.994868	-0.996876	-0.997881
-6.12018e-17	-0.0317121	-0.0633923	-0.0950087	-0.126529	-0.157923	-0.189157	-0.220201	-0.251023	-0.281592	-0.311878	-0.34185	-0.371477	-0.400731	-0.429581	-0.457998	-0.485954	-0.513421	-0.540371	-0.566777	-0.592612	-0.617851	-0.642467	-0.666437	-0.689735	-0.712339	-0.734226	-0.755373	-0.77576	-0.795365	-0.81417	-0.832155	-0.849302	-0.865594	-0.881014	-0.895547	-0.909179	-0.921895	-0.933682	-0.94453	-0.954426	-0.963362	-0.971327	-0.978315	-0.984317	-0.989328	-0.993343	-0.996358	-0.998369	-0.999376
-6.12323e-17	-0.0317279	-0.0634239	-0.095056	-0.126592	-0.158001	-0.189251	-0.220311	-0.251148	-0.281733	-0.312033	-0.34202	-0.371662	-0.400931	-0.429795	-0.458227	-0.486197	-0.513677	-0.540641	-0.56706	-0.592908	-0.618159	-0.642788	-0.666769	-0.690079	-0.712694	-0.734592	-0.75575	-0.776146	-0.795762	-0.814576	-0.83257	-0.849725	-0.866025	-0.881453	-0.895994	-0.909632	-0.922354	-0.934148	-0.945001	-0.954902	-0.963842	-0.971812	-0.978802	-0.984808	-0.989821	-0.993838	-0.996855	-0.998867	-0.999874
-7.4988e-33	-3.88555e-18	-7.76719e-18	-1.1641e-17	-1.55031e-17	-1.93496e-17	-2.31766e-17	-2.69803e-17	-3.07568e-17	-3.45023e-17	-3.82131e-17	-4.18854e-17	-4.55155e-17	-4.90998e-17	-5.26347e-17	-5.61166e-17	-5.95419e-17	-6.29073e-17	-6.62094e-17	-6.94448e-17	-7.26103e-17	-7.57026e-17	-7.87188e-17	-8.16557e-17	-8.45103e-17	-8.72799e-17	-8.99615e-17	-9.25526e-17	-9.50505e-17	-9.74527e-17	-9.97568e-17	-1.0196e-16	-1.04061e-16	-1.06058e-16	-1.07947e-16	-1.09728e-16	-1.11398e-16	-1.12956e-16	-1.144e-16	-1.15729e-16	-1.16942e-16	-1.18037e-16	-1.19013e-16	-1.19869e-16	-1.20604e-16	-1.21218e-16	-1.2171e-16	-1.2208e-16	-1.22326e-16	-1.22449e-16
-1.93302e-18	-0.0010016	-0.0020022	-0.00300078	-0.00399634	-0.00498787	-0.00597439	-0.00695488	-0.00792838	-0.00889389	-0.00985044	-0.0107971	-0.0117328	-0.0126568	-0.013568	-0.0144655	-0.0153485	-0.0162161	-0.0170672	-0.0179013	-0.0187172	-0.0195144	-0.0202919	-0.0210489	-0.0217848	-0.0224987	-0.02319	-0.0238579	-0.0245018	-0.025121	-0.025715	-0.026283	-0.0268246	-0.0273392	-0.0278262	-0.0282852	-0.0287158	-0.0291174	-0.0294897	-0.0298323	-0.0301449	-0.0304271	-0.0306787	-0.0308994	-0.031089	-0.0312472	-0.031374	-0.0314693	-0.0315328	-0.0315646
-3.86411e-18	-0.00200221	-0.00400241	-0.00599857	-0.0079887	-0.00997078	-0.0119428	-0.0139028	-0.0158489	-0.0177789	-0.0196911	-0.0215834	-0.023454	-0.025301	-0.0271225	-0.0289167	-0.0306818	-0.0324159	-0.0341175	-0.0357847	-0.0374158	-0.0390093	-0.0405635	-0.0420769	-0.0435479	-0.044975	-0.0463569	-0.0476921	-0.0489792	-0.0502171	-0.0514043	-0.0525398	-0.0536225	-0.0546511	-0.0556247	-0.0565423	-0.0574029	-0.0582058	-0.05895	-0.0596349	-0.0602597	-0.0608239	-0.0613268	-0.0617679	-0.0621469	-0.0624633	-0.0627168	-0.0629071	-0.0630342	-0.0630977
-5.79134e-18	-0.00300082	-0.00599862	-0.00899038	-0.0119731	-0.0149437	-0.0178993	-0.0208369	-0.0237535	-0.0266462	-0.0295121	-0.0323482	-0.0351518	-0.0379199	-0.0406499	-0.043339	-0.0459844	-0.0485835	-0.0511337	-0.0536324	-0.0560771	-0.0584654	-0.0607947	-0.0630629	-0.0652675	-0.0674065	-0.0694775	-0.0714786	-0.0734078	-0.075263	-0.0770424	-0.0787443	-0.0803669	-0.0819085	-0.0833677	-0.0847429	-0.0860328	-0.0872361	-0.0883515	-0.089378	-0.0903145	-0.09116	-0.0919138	-0.0925749	-0.0931429	-0.0936171	-0.0939971	-0.0942823	-0.0944727	-0.0945679
-7.71281e-18	-0.00399644	-0.00798886	-0.0119732	-0.0159455	-0.0199018	-0.023838	-0.0277502	-0.0316345	-0.0354869	-0.0393036	-0.0430808	-0.0468145	-0.0505011	-0.0541368	-0.0577181	-0.0612412	-0.0647027	-0.068099	-0.0714267	-0.0746825	-0.0778631	-0.0809653	-0.083986	-0.0869221	-0.0897707	-0.092529	-0.095194	-0.0977632	-0.100234	-0.102604	-0.10487	-0.107031	-0.109084	-0.111028	-0.112859	-0.114577	-0.116179	-0.117665	-0.119032	-0.120279	-0.121405	-0.122409	-0.12329	-0.124046	-0.124678	-0.125184	-0.125564	-0.125817	-0.125944
-9.62658e-18	-0.00498808	-0.00997113	-0.0149441	-0.0199021	-0.02484	-0.029753	-0.0346359	-0.039484	-0.0442923	-0.049056	-0.0537704	-0.0584306	-0.0630319	-0.0675698	-0.0720396	-0.076437	-0.0807573	-0.0849963	-0.0891498	-0.0932135	-0.0971833	-0.101055	-0.104825	-0.10849	-0.112046	-0.115488	-0.118814	-0.122021	-0.125105	-0.128063	-0.130892	-0.133589	-0.136151	-0.138577	-0.140863	-0.143007	-0.145007	-0.146861	-0.148567	-0.150124	-0.15153	-0.152782	-0.153881	-0.154826	-0.155614	-0.156245	-0.15672	-0.157036	-0.157194
-1.15308e-17	-0.00597474	-0.0119435	-0.0179002	-0.0238388	-0.0297535	-0.0356382	-0.041487	-0.0472941	-0.0530535	-0.0587595	-0.0644064	-0.0699884	-0.0754999	-0.0809354	-0.0862894	-0.0915565	-0.0967314	-0.101809	-0.106784	-0.111651	-0.116407	-0.121044	-0.12556	-0.12995	-0.134209	-0.138332	-0.142316	-0.146157	-0.149851	-0.153394	-0.156783	-0.160013	-0.163083	-0.165988	-0.168726	-0.171294	-0.17369	-0.175911	-0.177955	-0.179819	-0.181503	-0.183003	-0.18432	-0.185451	-0.186395	-0.187151	-0.187719	-0.188098	-0.188288
-1.34235e-17	-0.00695545	-0.0139039	-0.0208383	-0.0277518	-0.0346373	-0.041488	-0.0482968	-0.0550571	-0.0617619	-0.0684045	-0.0749782	-0.0814764	-0.0878926	-0.0942203	-0.100453	-0.106585	-0.112609	-0.11852	-0.124312	-0.129978	-0.135514	-0.140913	-0.14617	-0.15128	-0.156238	-0.161038	-0.165677	-0.170148	-0.174448	-0.178573	-0.182517	-0.186278	-0.189851	-0.193234	-0.196421	-0.199411	-0.2022	-0.204785	-0.207165	-0.209335	-0.211295	-0.213042	-0.214575	-0.215891	-0.21699	-0.217871	-0.218532	-0.218973	-0.219194
-1.53028e-17	-0.00792922	-0.0158505	-0.0237557	-0.0316371	-0.0394866	-0.0472963	-0.0550585	-0.0627651	-0.0704086	-0.0779812	-0.0854753	-0.0928833	-0.100198	-0.107411	-0.114517	-0.121507	-0.128375	-0.135113	-0.141716	-0.148175	-0.154486	-0.160641	-0.166634	-0.17246	-0.178112	-0.183584	-0.188872	-0.193969	-0.198871	-0.203573	-0.20807	-0.212357	-0.216431	-0.220287	-0.22392	-0.227329	-0.230508	-0.233456	-0.236168	-0.238642	-0.240877	-0.242868	-0.244615	-0.246116	-0.247369	-0.248373	-0.249127	-0.24963	-0.249882
-1.71668e-17	-0.00889509	-0.0177812	-0.0266495	-0.0354909	-0.0442965	-0.0530576	-0.0617652	-0.0704107	-0.0789852	-0.0874802	-0.0958871	-0.104198	-0.112403	-0.120495	-0.128466	-0.136308	-0.144012	-0.151571	-0.158978	-0.166225	-0.173304	-0.180209	-0.186932	-0.193467	-0.199808	-0.205947	-0.211878	-0.217597	-0.223096	-0.228371	-0.233415	-0.238225	-0.242795	-0.24712	-0.251197	-0.25502	-0.258587	-0.261893	-0.264936	-0.267712	-0.270218	-0.272452	-0.274412	-0.276096	-0.277502	-0.278628	-0.279473	-0.280038	-0.28032
-1.90137e-17	-0.0098521	-0.0196943	-0.0295166	-0.0393092	-0.0490623	-0.0587659	-0.0684104	-0.077986	-0.087483	-0.096892	-0.106203	-0.115408	-0.124496	-0.133459	-0.142288	-0.150973	-0.159506	-0.167879	-0.176082	-0.184109	-0.19195	-0.199597	-0.207044	-0.214282	-0.221304	-0.228104	-0.234674	-0.241007	-0.247098	-0.252941	-0.258528	-0.263855	-0.268917	-0.273707	-0.278222	-0.282457	-0.286408	-0.29007	-0.29344	-0.296514	-0.29929	-0.301765	-0.303936	-0.305801	-0.307357	-0.308605	-0.309541	-0.310166	-0.310479
-2.08417e-17	-0.0107993	-0.0215877	-0.0323543	-0.0430884	-0.0537791	-0.0644157	-0.0749874	-0.0854836	-0.0958937	-0.106207	-0.116414	-0.126503	-0.136465	-0.14629	-0.155967	-0.165487	-0.174841	-0.184019	-0.193011	-0.201809	-0.210404	-0.218786	-0.226949	-0.234883	-0.242581	-0.250034	-0.257235	-0.264178	-0.270854	-0.277258	-0.283383	-0.289222	-0.29477	-0.300021	-0.304971	-0.309613	-0.313943	-0.317957	-0.321651	-0.325021	-0.328064	-0.330777	-0.333156	-0.3352	-0.336907	-0.338274	-0.339301	-0.339986	-0.340328
-2.26489e-17	-0.0117357	-0.0234596	-0.0351598	-0.0468247	-0.0584424	-0.0700013	-0.0814896	-0.0928959	-0.104209	-0.115417	-0.126508	-0.137472	-0.148298	-0.158975	-0.169491	-0.179837	-0.190002	-0.199975	-0.209747	-0.219308	-0.228648	-0.237758	-0.246628	-0.25525	-0.263615	-0.271715	-0.279541	-0.287085	-0.294341	-0.3013	-0.307955	-0.314301	-0.32033	-0.326037	-0.331415	-0.336459	-0.341165	-0.345528	-0.349542	-0.353204	-0.356511	-0.359459	-0.362045	-0.364266	-0.36612	-0.367606	-0.368722	-0.369466	-0.369839
-2.44336e-17	-0.0126604	-0.0253081	-0.0379303	-0.0505143	-0.0630474	-0.075517	-0.0879106	-0.100216	-0.11242	-0.124511	-0.136476	-0.148305	-0.159984	-0.171501	-0.182846	-0.194007	-0.204973	-0.215732	-0.226274	-0.236588	-0.246664	-0.256492	-0.266061	-0.275363	-0.284387	-0.293125	-0.301567	-0.309706	-0.317533	-0.325041	-0.332221	-0.339066	-0.345571	-0.351727	-0.357529	-0.362971	-0.368048	-0.372754	-0.377084	-0.381035	-0.384602	-0.387783	-0.390572	-0.392968	-0.394969	-0.396572	-0.397776	-0.398579	-0.39898
-2.61939e-17	-0.0135725	-0.0271314	-0.0406629	-0.0541535	-0.0675895	-0.0809575	-0.094244	-0.107436	-0.120519	-0.133481	-0.146309	-0.158989	-0.171509	-0.183857	-0.196019	-0.207984	-0.21974	-0.231274	-0.242576	-0.253633	-0.264435	-0.27497	-0.285229	-0.295201	-0.304875	-0.314242	-0.323293	-0.332018	-0.340409	-0.348458	-0.356155	-0.363494	-0.370467	-0.377066	-0.383286	-0.389121	-0.394563	-0.399608	-0.404251	-0.408486	-0.412311	-0.41572	-0.41871	-0.421279	-0.423424	-0.425142	-0.426433	-0.427294	-0.427724
-2.7928e-17	-0.0144711	-0.0289276	-0.043355	-0.0577387	-0.0720643	-0.0863173	-0.100483	-0.114548	-0.128498	-0.142318	-0.155995	-0.169515	-0.182864	-0.196029	-0.208997	-0.221754	-0.234288	-0.246586	-0.258636	-0.270425	-0.281942	-0.293175	-0.304113	-0.314744	-0.325059	-0.335047	-0.344697	-0.354	-0.362946	-0.371527	-0.379734	-0.387559	-0.394993	-0.40203	-0.408662	-0.414882	-0.420685	-0.426064	-0.431014	-0.43553	-0.439608	-0.443242	-0.446431	-0.44917	-0.451457	-0.453289	-0.454665	-0.455583	-0.456042
-2.96343e-17	-0.0153552	-0.030695	-0.0460039	-0.0612664	-0.0764672	-0.0915911	-0.106623	-0.121547	-0.136349	-0.151013	-0.165526	-0.179872	-0.194037	-0.208006	-0.221766	-0.235302	-0.248602	-0.261652	-0.274437	-0.286947	-0.299168	-0.311087	-0.322693	-0.333975	-0.344919	-0.355517	-0.365757	-0.375628	-0.385121	-0.394227	-0.402935	-0.411238	-0.419127	-0.426593	-0.43363	-0.440231	-0.446388	-0.452095	-0.457348	-0.46214	-0.466466	-0.470323	-0.473707	-0.476613	-0.47904	-0.480984	-0.482443	-0.483417	-0.483905
-3.13111e-17	-0.0162241	-0.0324318	-0.0486069	-0.064733	-0.080794	-0.0967736	-0.112656	-0.128424	-0.144064	-0.159558	-0.174892	-0.190049	-0.205016	-0.219775	-0.234314	-0.248617	-0.262669	-0.276456	-0.289966	-0.303183	-0.316095	-0.328689	-0.340952	-0.352872	-0.364436	-0.375633	-0.386452	-0.396882	-0.406913	-0.416533	-0.425734	-0.434507	-0.442842	-0.450731	-0.458166	-0.46514	-0.471646	-0.477676	-0.483226	-0.488289	-0.49286	-0.496935	-0.50051	-0.503581	-0.506145	-0.508199	-0.509741	-0.51077	-0.511285
-3.29567e-17	-0.0170767	-0.0341363	-0.0511614	-0.0681351	-0.0850401	-0.10186	-0.118576	-0.135174	-0.151635	-0.167944	-0.184083	-0.200038	-0.21579	-0.231326	-0.246628	-0.261683	-0.276473	-0.290986	-0.305205	-0.319117	-0.332708	-0.345964	-0.358871	-0.371417	-0.383589	-0.395375	-0.406762	-0.417741	-0.428298	-0.438424	-0.448109	-0.457343	-0.466116	-0.474419	-0.482245	-0.489586	-0.496433	-0.502781	-0.508622	-0.513951	-0.518763	-0.523052	-0.526815	-0.530047	-0.532746	-0.534908	-0.536531	-0.537614	-0.538156
-3.45694e-17	-0.0179124	-0.0358067	-0.053665	-0.0714692	-0.0892015	-0.106844	-0.124379	-0.141789	-0.159055	-0.176162	-0.193091	-0.209826	-0.22635	-0.242646	-0.258697	-0.274488	-0.290003	-0.305225	-0.32014	-0.334733	-0.348989	-0.362893	-0.376432	-0.389592	-0.40236	-0.414722	-0.426667	-0.438183	-0.449257	-0.459878	-0.470037	-0.479722	-0.488925	-0.497635	-0.505844	-0.513543	-0.520726	-0.527384	-0.533511	-0.539101	-0.544148	-0.548648	-0.552594	-0.555985	-0.558815	-0.561083	-0.562786	-0.563922	-0.564491
-3.61477e-17	-0.0187302	-0.0374415	-0.0561151	-0.0747322	-0.093274	-0.111722	-0.130057	-0.148262	-0.166317	-0.184205	-0.201907	-0.219406	-0.236684	-0.253724	-0.270508	-0.28702	-0.303243	-0.31916	-0.334756	-0.350015	-0.364922	-0.379461	-0.393618	-0.407379	-0.42073	-0.433656	-0.446147	-0.458188	-0.469767	-0.480874	-0.491497	-0.501624	-0.511247	-0.520354	-0.528938	-0.536989	-0.5445	-0.551462	-0.557869	-0.563714	-0.568991	-0.573696	-0.577823	-0.581368	-0.584328	-0.586699	-0.58848	-0.589668	-0.590262
-3.76899e-17	-0.0195293	-0.0390389	-0.0585092	-0.0779206	-0.0972535	-0.116489	-0.135606	-0.154587	-0.173413	-0.192064	-0.210521	-0.228767	-0.246782	-0.264549	-0.282049	-0.299265	-0.31618	-0.332777	-0.349039	-0.364949	-0.380491	-0.395651	-0.410412	-0.42476	-0.43868	-0.452158	-0.465181	-0.477736	-0.48981	-0.50139	-0.512466	-0.523026	-0.533059	-0.542555	-0.551505	-0.5599	-0.567731	-0.57499	-0.58167	-0.587765	-0.593267	-0.598173	-0.602476	-0.606172	-0.609258	-0.611731	-0.613587	-0.614826	-0.615446
-3.91946e-17	-0.0203089	-0.0405974	-0.060845	-0.0810314	-0.101136	-0.121139	-0.14102	-0.160759	-0.180336	-0.199731	-0.218926	-0.2379	-0.256634	-0.27511	-0.293309	-0.311213	-0.328803	-0.346062	-0.362973	-0.379518	-0.395681	-0.411446	-0.426796	-0.441717	-0.456193	-0.470209	-0.483752	-0.496808	-0.509364	-0.521407	-0.532925	-0.543906	-0.55434	-0.564215	-0.573522	-0.582252	-0.590395	-0.597945	-0.604891	-0.611229	-0.616952	-0.622053	-0.626528	-0.630372	-0.633581	-0.636152	-0.638083	-0.639371	-0.640016
-4.06602e-17	-0.0210683	-0.0421155	-0.0631202	-0.0840613	-0.104918	-0.125669	-0.146293	-0.16677	-0.187079	-0.2072	-0.227112	-0.246795	-0.26623	-0.285397	-0.304277	-0.32285	-0.341098	-0.359002	-0.376545	-0.393709	-0.410477	-0.426831	-0.442755	-0.458234	-0.473251	-0.487792	-0.501841	-0.515385	-0.528411	-0.540904	-0.552852	-0.564244	-0.575068	-0.585312	-0.594968	-0.604024	-0.612472	-0.620303	-0.62751	-0.634085	-0.640021	-0.645313	-0.649955	-0.653943	-0.657272	-0.65994	-0.661943	-0.663279	-0.663948
-4.20852e-17	-0.0218067	-0.0435915	-0.0653324	-0.0870075	-0.108595	-0.130073	-0.15142	-0.172615	-0.193636	-0.214462	-0.235072	-0.255445	-0.275561	-0.2954	-0.314941	-0.334165	-0.353053	-0.371585	-0.389743	-0.407508	-0.424863	-0.441791	-0.458273	-0.474294	-0.489838	-0.504888	-0.51943	-0.533449	-0.54693	-0.559861	-0.572229	-0.58402	-0.595223	-0.605827	-0.61582	-0.625194	-0.633938	-0.642044	-0.649503	-0.656308	-0.662453	-0.66793	-0.672735	-0.676862	-0.680308	-0.683069	-0.685142	-0.686526	-0.687218
-4.34683e-17	-0.0225234	-0.0450241	-0.0674795	-0.089867	-0.112164	-0.134348	-0.156397	-0.178288	-0.2	-0.22151	-0.242797	-0.26384	-0.284617	-0.305108	-0.325291	-0.345147	-0.364655	-0.383797	-0.402551	-0.420901	-0.438826	-0.45631	-0.473334	-0.489882	-0.505936	-0.521481	-0.536501	-0.55098	-0.564905	-0.578261	-0.591035	-0.603213	-0.614785	-0.625737	-0.636059	-0.64574	-0.654772	-0.663144	-0.670849	-0.677877	-0.684224	-0.689881	-0.694844	-0.699107	-0.702666	-0.705518	-0.707659	-0.709088	-0.709803
-4.48081e-17	-0.0232176	-0.0464119	-0.0695594	-0.0926368	-0.115621	-0.138489	-0.161217	-0.183783	-0.206164	-0.228337	-0.250281	-0.271972	-0.29339	-0.314512	-0.335317	-0.355785	-0.375895	-0.395626	-0.414959	-0.433874	-0.452352	-0.470374	-0.487923	-0.504981	-0.52153	-0.537554	-0.553037	-0.567962	-0.582316	-0.596084	-0.609252	-0.621806	-0.633733	-0.645023	-0.655663	-0.665643	-0.674953	-0.683583	-0.691525	-0.698771	-0.705313	-0.711145	-0.71626	-0.720655	-0.724324	-0.727263	-0.729471	-0.730943	-0.73168
-4.61032e-17	-0.0238887	-0.0477533	-0.0715699	-0.0953144	-0.118963	-0.142492	-0.165877	-0.189095	-0.212123	-0.234937	-0.257515	-0.279833	-0.30187	-0.323603	-0.345009	-0.366069	-0.38676	-0.407061	-0.426952	-0.446414	-0.465426	-0.48397	-0.502026	-0.519576	-0.536604	-0.553091	-0.569021	-0.584379	-0.599147	-0.613313	-0.626861	-0.639778	-0.652051	-0.663667	-0.674614	-0.684883	-0.694462	-0.703341	-0.711513	-0.718968	-0.725699	-0.731699	-0.736963	-0.741484	-0.745259	-0.748284	-0.750555	-0.75207	-0.752828
-4.73524e-17	-0.024536	-0.0490472	-0.0735091	-0.0978969	-0.122186	-0.146352	-0.170371	-0.194219	-0.21787	-0.241303	-0.264492	-0.287415	-0.310049	-0.33237	-0.354357	-0.375987	-0.397239	-0.41809	-0.438521	-0.45851	-0.478037	-0.497083	-0.515628	-0.533654	-0.551143	-0.568077	-0.584439	-0.600212	-0.615381	-0.629931	-0.643846	-0.657113	-0.669718	-0.681648	-0.692893	-0.70344	-0.713278	-0.722398	-0.730791	-0.738448	-0.745362	-0.751525	-0.756931	-0.761575	-0.765452	-0.768558	-0.770891	-0.772447	-0.773226
-4.85544e-17	-0.0251588	-0.0502922	-0.0753749	-0.100382	-0.125288	-0.150067	-0.174696	-0.199148	-0.223401	-0.247428	-0.271206	-0.294711	-0.317919	-0.340807	-0.363352	-0.385531	-0.407322	-0.428703	-0.449652	-0.470148	-0.490171	-0.5097	-0.528716	-0.5472	-0.565133	-0.582497	-0.599274	-0.615447	-0.631002	-0.64592	-0.660189	-0.673792	-0.686717	-0.698951	-0.710481	-0.721295	-0.731383	-0.740735	-0.749341	-0.757192	-0.764281	-0.770601	-0.776144	-0.780906	-0.784882	-0.788067	-0.790459	-0.792055	-0.792853
-4.97079e-17	-0.0257565	-0.051487	-0.0771657	-0.102767	-0.128264	-0.153633	-0.178846	-0.20388	-0.228708	-0.253306	-0.277649	-0.301712	-0.325472	-0.348904	-0.371984	-0.39469	-0.416999	-0.438888	-0.460334	-0.481318	-0.501816	-0.52181	-0.541278	-0.5602	-0.578559	-0.596335	-0.613511	-0.630069	-0.645993	-0.661266	-0.675873	-0.6898	-0.703032	-0.715557	-0.72736	-0.738432	-0.74876	-0.758333	-0.767144	-0.775182	-0.782439	-0.788909	-0.794584	-0.799459	-0.803529	-0.80679	-0.809238	-0.810872	-0.81169
-5.08119e-17	-0.0263285	-0.0526305	-0.0788795	-0.105049	-0.131113	-0.157045	-0.182818	-0.208408	-0.233788	-0.258932	-0.283816	-0.308413	-0.332701	-0.356653	-0.380246	-0.403456	-0.426261	-0.448635	-0.470558	-0.492008	-0.512962	-0.533399	-0.553299	-0.572642	-0.591409	-0.60958	-0.627137	-0.644063	-0.66034	-0.675953	-0.690884	-0.70512	-0.718646	-0.731449	-0.743515	-0.754832	-0.765389	-0.775176	-0.784182	-0.792398	-0.799817	-0.80643	-0.812231	-0.817215	-0.821375	-0.824708	-0.827211	-0.828882	-0.829717
-5.18653e-17	-0.0268743	-0.0537216	-0.0805148	-0.107227	-0.133831	-0.1603	-0.186608	-0.212728	-0.238634	-0.2643	-0.289699	-0.314807	-0.339598	-0.364047	-0.388129	-0.41182	-0.435097	-0.457936	-0.480313	-0.502207	-0.523596	-0.544457	-0.564769	-0.584514	-0.603669	-0.622217	-0.640138	-0.657415	-0.674029	-0.689965	-0.705207	-0.719738	-0.733544	-0.746612	-0.758928	-0.77048	-0.781256	-0.791246	-0.800438	-0.808825	-0.816397	-0.823148	-0.829069	-0.834156	-0.838403	-0.841805	-0.84436	-0.846065	-0.846917
-5.28669e-17	-0.0273933	-0.0547591	-0.0820697	-0.109298	-0.136416	-0.163396	-0.190212	-0.216837	-0.243243	-0.269404	-0.295294	-0.320887	-0.346156	-0.371077	-0.395625	-0.419774	-0.4435	-0.46678	-0.489589	-0.511906	-0.533708	-0.554971	-0.575677	-0.595802	-0.615328	-0.634233	-0.652501	-0.670111	-0.687047	-0.70329	-0.718826	-0.733638	-0.747711	-0.761031	-0.773585	-0.78536	-0.796344	-0.806527	-0.815897	-0.824446	-0.832164	-0.839045	-0.845081	-0.850266	-0.854594	-0.858063	-0.860667	-0.862404	-0.863274
-5.38159e-17	-0.027885	-0.055742	-0.0835428	-0.11126	-0.138864	-0.166329	-0.193626	-0.220729	-0.247609	-0.27424	-0.300595	-0.326647	-0.35237	-0.377738	-0.402726	-0.427309	-0.451461	-0.475158	-0.498378	-0.521095	-0.543287	-0.564933	-0.58601	-0.606497	-0.626373	-0.645618	-0.664213	-0.68214	-0.699379	-0.715914	-0.731729	-0.746807	-0.761132	-0.774692	-0.787471	-0.799457	-0.810639	-0.821004	-0.830542	-0.839244	-0.847101	-0.854106	-0.86025	-0.865528	-0.869934	-0.873465	-0.876116	-0.877884	-0.878769
-5.47112e-17	-0.028349	-0.0566694	-0.0849327	-0.113111	-0.141174	-0.169096	-0.196848	-0.224401	-0.251728	-0.278802	-0.305595	-0.332081	-0.358232	-0.384022	-0.409426	-0.434417	-0.458971	-0.483063	-0.506669	-0.529764	-0.552326	-0.574332	-0.595759	-0.616587	-0.636793	-0.656359	-0.675263	-0.693488	-0.711014	-0.727825	-0.743902	-0.759231	-0.773795	-0.78758	-0.800572	-0.812757	-0.824125	-0.834662	-0.84436	-0.853206	-0.861194	-0.868315	-0.874561	-0.879927	-0.884407	-0.887996	-0.890691	-0.892489	-0.893389
-5.5552e-17	-0.0287846	-0.0575402	-0.0862379	-0.114849	-0.143344	-0.171695	-0.199873	-0.22785	-0.255597	-0.283087	-0.310292	-0.337184	-0.363737	-0.389924	-0.415718	-0.441093	-0.466025	-0.490487	-0.514455	-0.537905	-0.560814	-0.583158	-0.604914	-0.626062	-0.646579	-0.666445	-0.68564	-0.704145	-0.721941	-0.73901	-0.755334	-0.770898	-0.785686	-0.799683	-0.812874	-0.825247	-0.83679	-0.847489	-0.857335	-0.866318	-0.874429	-0.881659	-0.888001	-0.893449	-0.897998	-0.901642	-0.904379	-0.906205	-0.907118
-5.63374e-17	-0.0291916	-0.0583537	-0.0874571	-0.116472	-0.145371	-0.174122	-0.202699	-0.231071	-0.259211	-0.287089	-0.314679	-0.341951	-0.36888	-0.395437	-0.421595	-0.44733	-0.472613	-0.497421	-0.521728	-0.54551	-0.568743	-0.591402	-0.613467	-0.634913	-0.655721	-0.675868	-0.695334	-0.7141	-0.732148	-0.749458	-0.766013	-0.781797	-0.796794	-0.810989	-0.824367	-0.836915	-0.84862	-0.859471	-0.869456	-0.878566	-0.886791	-0.894124	-0.900556	-0.906081	-0.910694	-0.91439	-0.917165	-0.919017	-0.919943
-5.70666e-17	-0.0295694	-0.0591091	-0.0885892	-0.11798	-0.147252	-0.176376	-0.205322	-0.234062	-0.262566	-0.290805	-0.318752	-0.346378	-0.373654	-0.400555	-0.427053	-0.45312	-0.478731	-0.50386	-0.528482	-0.552571	-0.576104	-0.599058	-0.621407	-0.643132	-0.664208	-0.684616	-0.704335	-0.723344	-0.741625	-0.759159	-0.775929	-0.791917	-0.807108	-0.821486	-0.835038	-0.847748	-0.859605	-0.870596	-0.880711	-0.889938	-0.89827	-0.905697	-0.912213	-0.917809	-0.922482	-0.926226	-0.929037	-0.930913	-0.931851
-5.77389e-17	-0.0299178	-0.0598055	-0.089633	-0.11937	-0.148987	-0.178454	-0.207741	-0.23682	-0.265659	-0.294231	-0.322507	-0.350459	-0.378057	-0.405274	-0.432084	-0.458458	-0.484371	-0.509796	-0.534708	-0.559082	-0.582892	-0.606116	-0.628729	-0.650709	-0.672034	-0.692682	-0.712633	-0.731866	-0.750362	-0.768103	-0.78507	-0.801247	-0.816617	-0.831165	-0.844876	-0.857736	-0.869733	-0.880853	-0.891087	-0.900424	-0.908854	-0.916368	-0.92296	-0.928623	-0.933351	-0.937138	-0.939983	-0.94188	-0.94283
-5.83537e-17	-0.0302364	-0.0604423	-0.0905874	-0.120641	-0.150574	-0.180354	-0.209953	-0.239341	-0.268488	-0.297364	-0.325941	-0.35419	-0.382082	-0.40959	-0.436685	-0.46334	-0.489529	-0.515225	-0.540402	-0.565035	-0.589099	-0.612569	-0.635423	-0.657638	-0.67919	-0.700058	-0.720221	-0.739659	-0.758352	-0.776282	-0.79343	-0.809779	-0.825313	-0.840015	-0.853872	-0.866869	-0.878993	-0.890233	-0.900575	-0.910011	-0.918531	-0.926126	-0.932788	-0.938511	-0.943289	-0.947117	-0.949992	-0.951909	-0.952869
-5.89104e-17	-0.0305248	-0.0610188	-0.0914515	-0.121792	-0.15201	-0.182075	-0.211956	-0.241624	-0.271049	-0.300201	-0.329051	-0.357569	-0.385727	-0.413497	-0.44085	-0.46776	-0.494198	-0.520139	-0.545557	-0.570424	-0.594718	-0.618413	-0.641485	-0.663911	-0.685668	-0.706736	-0.727091	-0.746714	-0.765586	-0.783687	-0.800998	-0.817503	-0.833185	-0.848028	-0.862017	-0.875138	-0.887378	-0.898724	-0.909166	-0.918692	-0.927293	-0.93496	-0.941686	-0.947463	-0.952287	-0.956151	-0.959053	-0.96099	-0.961958
-5.94083e-17	-0.0307828	-0.0615346	-0.0922244	-0.122821	-0.153295	-0.183614	-0.213748	-0.243666	-0.27334	-0.302738	-0.331832	-0.360591	-0.388987	-0.416992	-0.444576	-0.471713	-0.498375	-0.524536	-0.550168	-0.575246	-0.599745	-0.623639	-0.646906	-0.669522	-0.691464	-0.712709	-0.733236	-0.753026	-0.772057	-0.79031	-0.807768	-0.824413	-0.840227	-0.855196	-0.869303	-0.882535	-0.894878	-0.90632	-0.91685	-0.926456	-0.93513	-0.942862	-0.949645	-0.955471	-0.960335	-0.964233	-0.967159	-0.969112	-0.970089
-5.9847e-17	-0.0310101	-0.061989	-0.0929054	-0.123728	-0.154427	-0.184969	-0.215326	-0.245466	-0.275358	-0.304974	-0.334282	-0.363254	-0.39186	-0.420071	-0.447859	-0.475197	-0.502055	-0.528409	-0.55423	-0.579493	-0.604173	-0.628245	-0.651683	-0.674466	-0.69657	-0.717972	-0.738651	-0.758586	-0.777758	-0.796146	-0.813733	-0.8305	-0.846432	-0.861511	-0.875722	-0.889052	-0.901486	-0.913013	-0.92362	-0.933298	-0.942035	-0.949824	-0.956657	-0.962527	-0.967427	-0.971353	-0.974301	-0.976268	-0.977252
-6.0226e-17	-0.0312065	-0.0623816	-0.0934938	-0.124512	-0.155405	-0.186141	-0.21669	-0.24702	-0.277102	-0.306905	-0.336399	-0.365554	-0.394341	-0.422731	-0.450696	-0.478206	-0.505235	-0.531755	-0.55774	-0.583164	-0.608	-0.632223	-0.655811	-0.678738	-0.700981	-0.722519	-0.743329	-0.763391	-0.782684	-0.801189	-0.818887	-0.83576	-0.851792	-0.866967	-0.881268	-0.894682	-0.907196	-0.918795	-0.92947	-0.939209	-0.948002	-0.95584	-0.962716	-0.968623	-0.973554	-0.977505	-0.980472	-0.982451	-0.983441
-6.0545e-17	-0.0313718	-0.062712	-0.093989	-0.125171	-0.156228	-0.187127	-0.217837	-0.248329	-0.27857	-0.308531	-0.338181	-0.36749	-0.39643	-0.42497	-0.453083	-0.480739	-0.507911	-0.534572	-0.560694	-0.586252	-0.61122	-0.635572	-0.659284	-0.682333	-0.704694	-0.726346	-0.747266	-0.767434	-0.786829	-0.805432	-0.823224	-0.840187	-0.856304	-0.871559	-0.885936	-0.899421	-0.912001	-0.923662	-0.934393	-0.944183	-0.953023	-0.960903	-0.967815	-0.973753	-0.97871	-0.982682	-0.985665	-0.987655	-0.98865
-6.08036e-17	-0.0315058	-0.0629799	-0.0943905	-0.125706	-0.156895	-0.187926	-0.218768	-0.24939	-0.27976	-0.309849	-0.339626	-0.36906	-0.398124	-0.426786	-0.455018	-0.482793	-0.510081	-0.536856	-0.56309	-0.588757	-0.613831	-0.638287	-0.662101	-0.685248	-0.707704	-0.729449	-0.750458	-0.770712	-0.79019	-0.808873	-0.826741	-0.843776	-0.859962	-0.875282	-0.889721	-0.903263	-0.915897	-0.927608	-0.938385	-0.948217	-0.957094	-0.965008	-0.97195	-0.977913	-0.982891	-0.98688	-0.989875	-0.991874	-0.992874
-6.10017e-17	-0.0316084	-0.063185	-0.094698	-0.126116	-0.157406	-0.188538	-0.219481	-0.250202	-0.280671	-0.310858	-0.340732	-0.370262	-0.39942	-0.428176	-0.4565	-0.484365	-0.511742	-0.538604	-0.564924	-0.590674	-0.61583	-0.640366	-0.664257	-0.687479	-0.710009	-0.731824	-0.752903	-0.773223	-0.792764	-0.811507	-0.829433	-0.846524	-0.862763	-0.878133	-0.892618	-0.906205	-0.91888	-0.930629	-0.941441	-0.951305	-0.960211	-0.968151	-0.975115	-0.981098	-0.986093	-0.990094	-0.993099	-0.995104	-0.996107
-6.11389e-17	-0.0316795	-0.0633271	-0.094911	-0.126399	-0.15776	-0.188962	-0.219974	-0.250765	-0.281303	-0.311557	-0.341498	-0.371095	-0.400319	-0.429139	-0.457527	-0.485455	-0.512893	-0.539816	-0.566194	-0.592003	-0.617216	-0.641807	-0.665751	-0.689026	-0.711607	-0.733471	-0.754596	-0.774962	-0.794547	-0.813333	-0.831299	-0.848429	-0.864704	-0.880108	-0.894626	-0.908244	-0.920947	-0.932722	-0.943559	-0.953445	-0.962371	-0.970328	-0.977309	-0.983305	-0.988311	-0.992322	-0.995333	-0.997343	-0.998348
-6.12152e-17	-0.031719	-0.0634061	-0.0950294	-0.126557	-0.157957	-0.189198	-0.220249	-0.251078	-0.281654	-0.311946	-0.341924	-0.371558	-0.400818	-0.429674	-0.458098	-0.48606	-0.513533	-0.540489	-0.566901	-0.592742	-0.617986	-0.642607	-0.666582	-0.689886	-0.712494	-0.734386	-0.755538	-0.775929	-0.795539	-0.814348	-0.832336	-0.849487	-0.865783	-0.881206	-0.895743	-0.909377	-0.922096	-0.933886	-0.944736	-0.954635	-0.963572	-0.971539	-0.978528	-0.984532	-0.989544	-0.99356	-0.996575	-0.998587	-0.999594
-6.12304e-17	-0.0317269	-0.0634219	-0.0950531	-0.126589	-0.157996	-0.189245	-0.220304	-0.25114	-0.281724	-0.312024	-0.342009	-0.371651	-0.400918	-0.429782	-0.458212	-0.486182	-0.513661	-0.540624	-0.567042	-0.592889	-0.61814	-0.642768	-0.666748	-0.690058	-0.712672	-0.734569	-0.755726	-0.776122	-0.795737	-0.814551	-0.832544	-0.849699	-0.865998	-0.881426	-0.895966	-0.909604	-0.922326	-0.934119	-0.944971	-0.954872	-0.963812	-0.971781	-0.978772	-0.984777	-0.989791	-0.993808	-0.996824	-0.998836	-0.999843
-6.11847e-17	-0.0317032	-0.0633745	-0.094982	-0.126494	-0.157878	-0.189104	-0.220139	-0.250952	-0.281513	-0.31179	-0.341754	-0.371373	-0.400618	-0.42946	-0.45787	-0.485818	-0.513277	-0.54022	-0.566618	-0.592446	-0.617678	-0.642287	-0.66625	-0.689542	-0.712139	-0.73402	-0.755161	-0.775542	-0.795142	-0.813942	-0.831922	-0.849064	-0.865351	-0.880767	-0.895296	-0.908924	-0.921636	-0.93342	-0.944265	-0.954159	-0.963092	-0.971055	-0.97804	-0.984041	-0.989051	-0.993065	-0.996078	-0.998089	-0.999095
-6.10779e-17	-0.0316479	-0.0632639	-0.0948163	-0.126273	-0.157603	-0.188774	-0.219755	-0.250515	-0.281022	-0.311246	-0.341157	-0.370725	-0.399919	-0.428711	-0.457071	-0.48497	-0.512382	-0.539277	-0.56563	-0.591412	-0.6166	-0.641166	-0.665087	-0.688338	-0.710897	-0.732739	-0.753843	-0.774189	-0.793755	-0.812521	-0.83047	-0.847582	-0.863841	-0.87923	-0.893734	-0.907338	-0.920028	-0.931792	-0.942617	-0.952494	-0.961411	-0.96936	-0.976334	-0.982324	-0.987325	-0.991332	-0.99434	-0.996348	-0.997352
-6.09102e-17	-0.031561	-0.0630903	-0.094556	-0.125927	-0.15717	-0.188256	-0.219152	-0.249827	-0.280251	-0.310392	-0.340221	-0.369707	-0.398822	-0.427534	-0.455816	-0.483639	-0.510975	-0.537797	-0.564077	-0.589789	-0.614907	-0.639406	-0.663262	-0.686449	-0.708945	-0.730728	-0.751774	-0.772064	-0.791576	-0.810291	-0.82819	-0.845256	-0.86147	-0.876817	-0.891281	-0.904847	-0.917502	-0.929234	-0.94003	-0.949879	-0.958772	-0.9667	-0.973654	-0.979627	-0.984615	-0.988611	-0.991611	-0.993613	-0.994615
-6.06819e-17	-0.0314427	-0.0628538	-0.0942015	-0.125454	-0.156581	-0.18755	-0.21833	-0.24889	-0.2792	-0.309228	-0.338945	-0.368321	-0.397326	-0.425931	-0.454107	-0.481826	-0.50906	-0.535781	-0.561962	-0.587578	-0.612602	-0.637009	-0.660775	-0.683875	-0.706287	-0.727988	-0.748956	-0.769169	-0.788608	-0.807253	-0.825085	-0.842087	-0.85824	-0.873529	-0.887939	-0.901455	-0.914063	-0.92575	-0.936505	-0.946318	-0.955177	-0.963075	-0.970003	-0.975955	-0.980923	-0.984904	-0.987893	-0.989888	-0.990885
-6.0393e-17	-0.031293	-0.0625546	-0.0937531	-0.124857	-0.155836	-0.186657	-0.217291	-0.247705	-0.277871	-0.307756	-0.337332	-0.366568	-0.395435	-0.423904	-0.451946	-0.479532	-0.506636	-0.53323	-0.559287	-0.584781	-0.609686	-0.633977	-0.657629	-0.68062	-0.702925	-0.724523	-0.74539	-0.765508	-0.784854	-0.80341	-0.821158	-0.838078	-0.854155	-0.869371	-0.883712	-0.897164	-0.909711	-0.921343	-0.932048	-0.941813	-0.950631	-0.958491	-0.965386	-0.971309	-0.976254	-0.980216	-0.983191	-0.985176	-0.986169
-6.0044e-17	-0.0311122	-0.062193	-0.0932112	-0.124136	-0.154935	-0.185578	-0.216035	-0.246274	-0.276265	-0.305978	-0.335382	-0.364449	-0.393149	-0.421454	-0.449333	-0.476761	-0.503708	-0.530148	-0.556055	-0.581401	-0.606162	-0.630313	-0.653829	-0.676686	-0.698862	-0.720335	-0.741082	-0.761083	-0.780318	-0.798767	-0.816412	-0.833234	-0.849218	-0.864346	-0.878605	-0.891978	-0.904454	-0.916018	-0.926661	-0.93637	-0.945136	-0.952951	-0.959806	-0.965695	-0.970611	-0.97455	-0.977508	-0.979482	-0.980469
-5.96351e-17	-0.0309003	-0.0617695	-0.0925764	-0.12329	-0.15388	-0.184314	-0.214564	-0.244597	-0.274383	-0.303894	-0.333098	-0.361967	-0.390472	-0.418583	-0.446273	-0.473514	-0.500278	-0.526538	-0.552268	-0.577442	-0.602034	-0.62602	-0.649376	-0.672078	-0.694103	-0.715429	-0.736035	-0.7559	-0.775004	-0.793327	-0.810852	-0.82756	-0.843435	-0.85846	-0.872621	-0.885904	-0.898294	-0.90978	-0.92035	-0.929993	-0.9387	-0.946461	-0.95327	-0.959118	-0.964001	-0.967914	-0.970851	-0.972811	-0.973792
-5.91667e-17	-0.0306576	-0.0612843	-0.0918494	-0.122322	-0.152671	-0.182867	-0.212878	-0.242676	-0.272228	-0.301507	-0.330482	-0.359125	-0.387405	-0.415296	-0.442768	-0.469795	-0.496349	-0.522403	-0.54793	-0.572906	-0.597306	-0.621103	-0.644276	-0.6668	-0.688652	-0.709811	-0.730255	-0.749964	-0.768917	-0.787097	-0.804484	-0.82106	-0.83681	-0.851718	-0.865768	-0.878946	-0.891239	-0.902635	-0.913122	-0.922689	-0.931327	-0.939028	-0.945783	-0.951586	-0.95643	-0.960312	-0.963226	-0.965171	-0.966144
-5.86394e-17	-0.0303844	-0.0607381	-0.0910307	-0.121232	-0.151311	-0.181237	-0.210981	-0.240513	-0.269802	-0.29882	-0.327537	-0.355924	-0.383953	-0.411595	-0.438822	-0.465608	-0.491925	-0.517747	-0.543047	-0.5678	-0.591982	-0.615568	-0.638534	-0.660857	-0.682514	-0.703484	-0.723746	-0.743279	-0.762064	-0.780081	-0.797313	-0.813743	-0.829352	-0.844127	-0.858052	-0.871112	-0.883296	-0.89459	-0.904983	-0.914465	-0.923027	-0.930659	-0.937354	-0.943105	-0.947906	-0.951753	-0.954641	-0.956569	-0.957533
-5.80536e-17	-0.0300808	-0.0601314	-0.0901214	-0.120021	-0.149799	-0.179427	-0.208874	-0.23811	-0.267107	-0.295835	-0.324265	-0.352368	-0.380117	-0.407483	-0.434439	-0.460957	-0.487011	-0.512574	-0.537622	-0.562128	-0.586068	-0.609418	-0.632155	-0.654255	-0.675696	-0.696457	-0.716516	-0.735854	-0.754451	-0.772289	-0.789349	-0.805614	-0.821067	-0.835694	-0.84948	-0.86241	-0.874472	-0.885653	-0.895943	-0.90533	-0.913806	-0.921362	-0.92799	-0.933683	-0.938437	-0.942245	-0.945105	-0.947013	-0.947968
-5.74099e-17	-0.0297473	-0.0594647	-0.0891222	-0.11869	-0.148138	-0.177437	-0.206558	-0.23547	-0.264145	-0.292555	-0.32067	-0.348461	-0.375903	-0.402965	-0.429622	-0.455846	-0.481611	-0.506891	-0.531661	-0.555896	-0.579571	-0.602662	-0.625146	-0.647001	-0.668204	-0.688735	-0.708572	-0.727696	-0.746087	-0.763726	-0.780597	-0.796681	-0.811964	-0.826429	-0.840061	-0.852848	-0.864776	-0.875834	-0.886009	-0.895293	-0.903674	-0.911146	-0.917701	-0.923331	-0.928032	-0.931798	-0.934626	-0.936513	-0.937457
-5.6709e-17	-0.0293842	-0.0587387	-0.0880341	-0.117241	-0.14633	-0.175271	-0.204036	-0.232595	-0.260921	-0.288983	-0.316755	-0.344207	-0.371313	-0.398045	-0.424377	-0.450281	-0.475731	-0.500703	-0.52517	-0.549109	-0.572495	-0.595304	-0.617514	-0.639102	-0.660047	-0.680327	-0.699921	-0.718812	-0.736978	-0.754402	-0.771067	-0.786955	-0.802051	-0.816339	-0.829806	-0.842436	-0.854219	-0.865141	-0.875193	-0.884363	-0.892642	-0.900023	-0.906497	-0.912059	-0.916702	-0.920422	-0.923216	-0.92508	-0.926012
-5.59516e-17	-0.0289917	-0.0579542	-0.0868584	-0.115675	-0.144375	-0.17293	-0.201311	-0.229489	-0.257436	-0.285123	-0.312524	-0.33961	-0.366354	-0.392729	-0.418709	-0.444267	-0.469378	-0.494016	-0.518156	-0.541775	-0.564849	-0.587353	-0.609266	-0.630566	-0.651231	-0.67124	-0.690573	-0.709211	-0.727135	-0.744326	-0.760769	-0.776445	-0.791339	-0.805436	-0.818723	-0.831185	-0.84281	-0.853586	-0.863503	-0.872551	-0.88072	-0.888002	-0.89439	-0.899877	-0.904459	-0.908129	-0.910885	-0.912724	-0.913644
-5.51384e-17	-0.0285703	-0.0571119	-0.085596	-0.113994	-0.142277	-0.170417	-0.198385	-0.226153	-0.253694	-0.28098	-0.307982	-0.334674	-0.36103	-0.387021	-0.412623	-0.43781	-0.462556	-0.486836	-0.510626	-0.533901	-0.556639	-0.578817	-0.600412	-0.621402	-0.641766	-0.661484	-0.680537	-0.698904	-0.716567	-0.733509	-0.749712	-0.76516	-0.779838	-0.79373	-0.806824	-0.819105	-0.830561	-0.841181	-0.850953	-0.859869	-0.86792	-0.875096	-0.881391	-0.886799	-0.891313	-0.894931	-0.897647	-0.899459	-0.900366
-5.42703e-17	-0.0281205	-0.0562127	-0.0842483	-0.112199	-0.140037	-0.167734	-0.195261	-0.222593	-0.2497	-0.276556	-0.303133	-0.329405	-0.355345	-0.380928	-0.406127	-0.430917	-0.455273	-0.479171	-0.502586	-0.525495	-0.547875	-0.569703	-0.590958	-0.611618	-0.631662	-0.651069	-0.669822	-0.687899	-0.705285	-0.72196	-0.737908	-0.753113	-0.767559	-0.781233	-0.79412	-0.806208	-0.817484	-0.827936	-0.837555	-0.846331	-0.854254	-0.861318	-0.867514	-0.872836	-0.87728	-0.88084	-0.883513	-0.885297	-0.88619
-5.3348e-17	-0.0276426	-0.0552574	-0.0828166	-0.110292	-0.137657	-0.164883	-0.191943	-0.21881	-0.245457	-0.271856	-0.297982	-0.323807	-0.349307	-0.374454	-0.399225	-0.423594	-0.447536	-0.471028	-0.494045	-0.516565	-0.538565	-0.560022	-0.580916	-0.601224	-0.620927	-0.640005	-0.658439	-0.67621	-0.693299	-0.709691	-0.725368	-0.740314	-0.754516	-0.767957	-0.780625	-0.792507	-0.803592	-0.813867	-0.823322	-0.831949	-0.839737	-0.846681	-0.852771	-0.858004	-0.862372	-0.865871	-0.868499	-0.870253	-0.87113
-5.23726e-17	-0.0271372	-0.0542471	-0.0813024	-0.108276	-0.13514	-0.161868	-0.188434	-0.214809	-0.240969	-0.266885	-0.292533	-0.317887	-0.34292	-0.367608	-0.391926	-0.415849	-0.439353	-0.462415	-0.485012	-0.50712	-0.528717	-0.549783	-0.570294	-0.590231	-0.609574	-0.628303	-0.6464	-0.663846	-0.680623	-0.696715	-0.712105	-0.726778	-0.74072	-0.753916	-0.766352	-0.778017	-0.788899	-0.798986	-0.808268	-0.816737	-0.824384	-0.8312	-0.837179	-0.842316	-0.846604	-0.85004	-0.85262	-0.854341	-0.855202
-5.1345e-17	-0.0266047	-0.0531827	-0.0797071	-0.106151	-0.132488	-0.158692	-0.184736	-0.210594	-0.23624	-0.261649	-0.286793	-0.311649	-0.336191	-0.360395	-0.384235	-0.407689	-0.430732	-0.453342	-0.475495	-0.497169	-0.518343	-0.538995	-0.559104	-0.57865	-0.597613	-0.615975	-0.633717	-0.65082	-0.667268	-0.683044	-0.698132	-0.712518	-0.726186	-0.739123	-0.751315	-0.762751	-0.773419	-0.783308	-0.792409	-0.800712	-0.808208	-0.81489	-0.820753	-0.825788	-0.829992	-0.833361	-0.83589	-0.837577	-0.838422
-5.02662e-17	-0.0260457	-0.0520653	-0.0780323	-0.103921	-0.129705	-0.155358	-0.180855	-0.20617	-0.231277	-0.256151	-0.280767	-0.305101	-0.329127	-0.352822	-0.376162	-0.399123	-0.421682	-0.443817	-0.465504	-0.486723	-0.507452	-0.52767	-0.547357	-0.566492	-0.585057	-0.603033	-0.620402	-0.637146	-0.653248	-0.668693	-0.683464	-0.697547	-0.710928	-0.723593	-0.735529	-0.746725	-0.757169	-0.76685	-0.77576	-0.783888	-0.791227	-0.797769	-0.803508	-0.808437	-0.812553	-0.815851	-0.818327	-0.819979	-0.820806
-4.91373e-17	-0.0254608	-0.0508959	-0.0762798	-0.101587	-0.126792	-0.151869	-0.176793	-0.201539	-0.226083	-0.250398	-0.274462	-0.298249	-0.321736	-0.344898	-0.367714	-0.390159	-0.412212	-0.433849	-0.45505	-0.475792	-0.496055	-0.515819	-0.535064	-0.553769	-0.571917	-0.589489	-0.606468	-0.622836	-0.638577	-0.653675	-0.668114	-0.681881	-0.694961	-0.707342	-0.71901	-0.729954	-0.740164	-0.749628	-0.758337	-0.766283	-0.773457	-0.779852	-0.785462	-0.790281	-0.794304	-0.797528	-0.799948	-0.801563	-0.802371
-4.79594e-17	-0.0248504	-0.0496759	-0.0744513	-0.0991517	-0.123752	-0.148228	-0.172555	-0.196708	-0.220663	-0.244396	-0.267882	-0.291099	-0.314023	-0.336631	-0.358899	-0.380807	-0.40233	-0.423449	-0.444141	-0.464387	-0.484164	-0.503454	-0.522237	-0.540494	-0.558207	-0.575358	-0.59193	-0.607906	-0.623269	-0.638005	-0.652098	-0.665535	-0.678302	-0.690386	-0.701774	-0.712456	-0.722421	-0.731658	-0.740158	-0.747913	-0.754916	-0.761157	-0.766633	-0.771337	-0.775263	-0.77841	-0.780772	-0.782348	-0.783137
-4.67336e-17	-0.0242153	-0.0484063	-0.0725485	-0.0966177	-0.12059	-0.14444	-0.168145	-0.191681	-0.215023	-0.23815	-0.261036	-0.28366	-0.305998	-0.328027	-0.349727	-0.371074	-0.392048	-0.412627	-0.43279	-0.452518	-0.47179	-0.490587	-0.50889	-0.526681	-0.543941	-0.560654	-0.576802	-0.592369	-0.60734	-0.621699	-0.635433	-0.648526	-0.660966	-0.672741	-0.683839	-0.694248	-0.703958	-0.712959	-0.721242	-0.728799	-0.735622	-0.741704	-0.74704	-0.751623	-0.75545	-0.758516	-0.760818	-0.762354	-0.763122
-4.54613e-17	-0.0235561	-0.0470885	-0.0705734	-0.0939873	-0.117307	-0.140508	-0.163567	-0.186462	-0.20917	-0.231666	-0.253929	-0.275937	-0.297667	-0.319097	-0.340206	-0.360972	-0.381375	-0.401393	-0.421008	-0.440199	-0.458946	-0.477231	-0.495036	-0.512342	-0.529133	-0.54539	-0.561099	-0.576242	-0.590806	-0.604774	-0.618133	-0.63087	-0.642972	-0.654426	-0.665222	-0.675347	-0.684793	-0.693549	-0.701607	-0.708958	-0.715595	-0.721512	-0.726702	-0.731161	-0.734883	-0.737866	-0.740105	-0.741599	-0.742347
-4.41437e-17	-0.0228734	-0.0457237	-0.068528	-0.0912633	-0.113907	-0.136435	-0.158827	-0.181058	-0.203107	-0.224952	-0.24657	-0.26794	-0.28904	-0.309849	-0.330346	-0.35051	-0.370321	-0.38976	-0.408806	-0.42744	-0.445644	-0.4634	-0.480688	-0.497493	-0.513797	-0.529583	-0.544836	-0.559541	-0.573682	-0.587246	-0.600218	-0.612586	-0.624337	-0.635459	-0.645942	-0.655774	-0.664945	-0.673448	-0.681272	-0.68841	-0.694855	-0.7006	-0.70564	-0.70997	-0.713584	-0.71648	-0.718655	-0.720105	-0.720831
-4.27821e-17	-0.0221678	-0.0443134	-0.0664142	-0.0884483	-0.110393	-0.132227	-0.153928	-0.175473	-0.196842	-0.218013	-0.238964	-0.259675	-0.280124	-0.300291	-0.320156	-0.339698	-0.358899	-0.377738	-0.396196	-0.414256	-0.431899	-0.449106	-0.465862	-0.482148	-0.497949	-0.513248	-0.528031	-0.542282	-0.555987	-0.569132	-0.581704	-0.593691	-0.605079	-0.615858	-0.626018	-0.635546	-0.644435	-0.652675	-0.660258	-0.667176	-0.673422	-0.67899	-0.683875	-0.688071	-0.691574	-0.69438	-0.696488	-0.697894	-0.698597
-4.13779e-17	-0.0214402	-0.0428588	-0.0642343	-0.0855451	-0.10677	-0.127887	-0.148875	-0.169714	-0.190381	-0.210857	-0.231121	-0.251152	-0.27093	-0.290435	-0.309647	-0.328548	-0.347118	-0.365339	-0.383192	-0.400659	-0.417722	-0.434365	-0.45057	-0.466322	-0.481604	-0.496402	-0.510699	-0.524482	-0.537738	-0.550451	-0.562611	-0.574204	-0.585218	-0.595644	-0.605469	-0.614686	-0.623283	-0.631252	-0.638586	-0.645277	-0.651318	-0.656703	-0.661428	-0.665486	-0.668874	-0.671588	-0.673626	-0.674986	-0.675667
-3.99324e-17	-0.0206912	-0.0413616	-0.0619903	-0.0825566	-0.10304	-0.123419	-0.143674	-0.163785	-0.18373	-0.203491	-0.223047	-0.242378	-0.261465	-0.280289	-0.29883	-0.317071	-0.334992	-0.352576	-0.369805	-0.386662	-0.403129	-0.419191	-0.43483	-0.450032	-0.46478	-0.47906	-0.492858	-0.50616	-0.518952	-0.531222	-0.542956	-0.554144	-0.564774	-0.574835	-0.584318	-0.593212	-0.601509	-0.6092	-0.616278	-0.622735	-0.628565	-0.633762	-0.638321	-0.642237	-0.645507	-0.648127	-0.650094	-0.651406	-0.652063
-3.8447e-17	-0.0199216	-0.0398231	-0.0596845	-0.0794859	-0.0992072	-0.118829	-0.13833	-0.157693	-0.176896	-0.195922	-0.21475	-0.233362	-0.251739	-0.269863	-0.287715	-0.305277	-0.322532	-0.339462	-0.35605	-0.37228	-0.388135	-0.403599	-0.418656	-0.433292	-0.447492	-0.461241	-0.474526	-0.487333	-0.499649	-0.511462	-0.522761	-0.533532	-0.543767	-0.553454	-0.562584	-0.571147	-0.579135	-0.58654	-0.593355	-0.599572	-0.605185	-0.610189	-0.614578	-0.618349	-0.621497	-0.624019	-0.625913	-0.627177	-0.627809
-3.69234e-17	-0.0191321	-0.0382449	-0.0573193	-0.0763359	-0.0952756	-0.114119	-0.132848	-0.151444	-0.169886	-0.188158	-0.20624	-0.224114	-0.241763	-0.259169	-0.276313	-0.293179	-0.30975	-0.326009	-0.34194	-0.357527	-0.372753	-0.387604	-0.402065	-0.416121	-0.429758	-0.442963	-0.455721	-0.46802	-0.479848	-0.491193	-0.502044	-0.512389	-0.522218	-0.531521	-0.540289	-0.548513	-0.556184	-0.563296	-0.56984	-0.575811	-0.581202	-0.586007	-0.590223	-0.593844	-0.596867	-0.59929	-0.601109	-0.602322	-0.602929
-3.5363e-17	-0.0183236	-0.0366287	-0.0548969	-0.0731098	-0.0912491	-0.109297	-0.127234	-0.145043	-0.162707	-0.180206	-0.197524	-0.214643	-0.231546	-0.248216	-0.264636	-0.280789	-0.29666	-0.312232	-0.327489	-0.342417	-0.357	-0.371223	-0.385073	-0.398535	-0.411596	-0.424242	-0.436461	-0.448241	-0.459569	-0.470435	-0.480827	-0.490734	-0.500148	-0.509058	-0.517455	-0.525332	-0.532679	-0.53949	-0.545758	-0.551476	-0.556639	-0.561242	-0.565279	-0.568747	-0.571643	-0.573963	-0.575705	-0.576867	-0.577448
-3.37673e-17	-0.0174967	-0.0349759	-0.0524197	-0.0698109	-0.0871317	-0.104365	-0.121493	-0.138498	-0.155365	-0.172074	-0.188611	-0.204958	-0.221098	-0.237015	-0.252694	-0.268119	-0.283273	-0.298143	-0.312712	-0.326966	-0.340891	-0.354473	-0.367697	-0.380552	-0.393023	-0.405099	-0.416767	-0.428015	-0.438832	-0.449207	-0.45913	-0.468591	-0.47758	-0.486088	-0.494106	-0.501627	-0.508643	-0.515147	-0.521132	-0.526592	-0.531522	-0.535917	-0.539772	-0.543084	-0.545848	-0.548064	-0.549727	-0.550837	-0.551392
-3.21379e-17	-0.0166525	-0.0332882	-0.0498904	-0.0664423	-0.0829274	-0.0993289	-0.11563	-0.131816	-0.147868	-0.163771	-0.17951	-0.195068	-0.210429	-0.225579	-0.240501	-0.255181	-0.269605	-0.283757	-0.297623	-0.311189	-0.324442	-0.337368	-0.349955	-0.362189	-0.374059	-0.385552	-0.396657	-0.407362	-0.417657	-0.427532	-0.436976	-0.44598	-0.454535	-0.462633	-0.470264	-0.477422	-0.4841	-0.49029	-0.495986	-0.501183	-0.505875	-0.510057	-0.513727	-0.516878	-0.51951	-0.521618	-0.523201	-0.524258	-0.524786
-3.04765e-17	-0.0157916	-0.0315673	-0.0473113	-0.0630075	-0.0786404	-0.0941941	-0.109653	-0.125001	-0.140224	-0.155305	-0.17023	-0.184984	-0.199551	-0.213917	-0.228068	-0.24199	-0.255667	-0.269088	-0.282237	-0.295102	-0.30767	-0.319928	-0.331864	-0.343466	-0.354722	-0.365621	-0.376151	-0.386303	-0.396066	-0.40543	-0.414386	-0.422925	-0.431038	-0.438717	-0.445954	-0.452742	-0.459074	-0.464944	-0.470345	-0.475274	-0.479723	-0.48369	-0.487169	-0.490158	-0.492654	-0.494653	-0.496154	-0.497156	-0.497657
-2.87848e-17	-0.014915	-0.029815	-0.044685	-0.05951	-0.074275	-0.0889653	-0.103566	-0.118062	-0.13244	-0.146684	-0.160781	-0.174715	-0.188474	-0.202043	-0.215408	-0.228557	-0.241475	-0.25415	-0.26657	-0.278721	-0.290591	-0.302169	-0.313442	-0.3244	-0.335031	-0.345325	-0.355271	-0.364859	-0.37408	-0.382925	-0.391384	-0.399448	-0.407111	-0.414363	-0.421199	-0.42761	-0.43359	-0.439134	-0.444236	-0.448891	-0.453093	-0.45684	-0.460126	-0.462949	-0.465306	-0.467194	-0.468612	-0.469559	-0.470032
-2.70643e-17	-0.0140235	-0.028033	-0.0420142	-0.0559531	-0.0698356	-0.0836479	-0.0973759	-0.111006	-0.124524	-0.137917	-0.151171	-0.164272	-0.177209	-0.189967	-0.202533	-0.214896	-0.227042	-0.23896	-0.250637	-0.262062	-0.273222	-0.284108	-0.294708	-0.305011	-0.315006	-0.324685	-0.334037	-0.343052	-0.351722	-0.360037	-0.367991	-0.375573	-0.382778	-0.389597	-0.396024	-0.402052	-0.407675	-0.412887	-0.417684	-0.422061	-0.426012	-0.429535	-0.432625	-0.435279	-0.437495	-0.43927	-0.440604	-0.441493	-0.441938
-2.53169e-17	-0.0131181	-0.026223	-0.0393015	-0.0523404	-0.0653266	-0.078247	-0.0910887	-0.103839	-0.116484	-0.129012	-0.14141	-0.153666	-0.165767	-0.177701	-0.189456	-0.201021	-0.212383	-0.223531	-0.234454	-0.245141	-0.255581	-0.265764	-0.27568	-0.285317	-0.294668	-0.303721	-0.312469	-0.320902	-0.329012	-0.336791	-0.344231	-0.351324	-0.358063	-0.364442	-0.370454	-0.376093	-0.381353	-0.386229	-0.390716	-0.39481	-0.398506	-0.401801	-0.404692	-0.407175	-0.409247	-0.410908	-0.412155	-0.412988	-0.413404
-2.35442e-17	-0.0121996	-0.0243869	-0.0365496	-0.0486755	-0.0607525	-0.0727682	-0.0847107	-0.0965679	-0.108328	-0.119979	-0.131509	-0.142906	-0.15416	-0.165259	-0.176191	-0.186945	-0.197512	-0.20788	-0.218038	-0.227977	-0.237686	-0.247156	-0.256377	-0.265339	-0.274035	-0.282455	-0.29059	-0.298433	-0.305975	-0.313209	-0.320128	-0.326724	-0.332992	-0.338924	-0.344515	-0.349759	-0.354651	-0.359185	-0.363358	-0.367165	-0.370603	-0.373667	-0.376355	-0.378664	-0.380592	-0.382137	-0.383296	-0.38407	-0.384457
-2.1748e-17	-0.0112689	-0.0225264	-0.0337613	-0.0449622	-0.0561178	-0.0672168	-0.0782483	-0.0892009	-0.100064	-0.110826	-0.121476	-0.132004	-0.1424	-0.152651	-0.162749	-0.172684	-0.182444	-0.192021	-0.201404	-0.210585	-0.219553	-0.228301	-0.236818	-0.245097	-0.253129	-0.260907	-0.268422	-0.275666	-0.282633	-0.289315	-0.295706	-0.301799	-0.307588	-0.313068	-0.318232	-0.323076	-0.327595	-0.331784	-0.335638	-0.339155	-0.34233	-0.345161	-0.347644	-0.349777	-0.351557	-0.352984	-0.354055	-0.35477	-0.355128
-1.99302e-17	-0.010327	-0.0206435	-0.0309393	-0.041204	-0.0514271	-0.0615985	-0.0717078	-0.081745	-0.0916998	-0.101562	-0.111323	-0.120971	-0.130497	-0.139892	-0.149146	-0.15825	-0.167194	-0.175971	-0.18457	-0.192983	-0.201202	-0.209218	-0.217023	-0.224611	-0.231971	-0.239099	-0.245985	-0.252624	-0.259009	-0.265132	-0.270989	-0.276573	-0.281878	-0.2869	-0.291633	-0.296072	-0.300213	-0.304051	-0.307584	-0.310807	-0.313716	-0.31631	-0.318586	-0.32054	-0.322172	-0.32348	-0.324462	-0.325117	-0.325444
-1.80925e-17	-0.00937476	-0.0187401	-0.0280865	-0.0374047	-0.0466852	-0.0559187	-0.0650959	-0.0742076	-0.0832445	-0.0921976	-0.101058	-0.109816	-0.118464	-0.126993	-0.135394	-0.143658	-0.151778	-0.159745	-0.167551	-0.175189	-0.18265	-0.189927	-0.197013	-0.2039	-0.210582	-0.217052	-0.223304	-0.229331	-0.235126	-0.240686	-0.246002	-0.251071	-0.255888	-0.260446	-0.264742	-0.268772	-0.272531	-0.276016	-0.279223	-0.282148	-0.28479	-0.287145	-0.28921	-0.290985	-0.292466	-0.293653	-0.294544	-0.295139	-0.295436
-1.62368e-17	-0.00841321	-0.0168179	-0.0252057	-0.0335682	-0.0418968	-0.0501832	-0.0584191	-0.0665962	-0.0747062	-0.082741	-0.0906925	-0.0985527	-0.106314	-0.113967	-0.121507	-0.128923	-0.13621	-0.14336	-0.150366	-0.15722	-0.163915	-0.170446	-0.176805	-0.182986	-0.188983	-0.19479	-0.2004	-0.205809	-0.21101	-0.215999	-0.22077	-0.225319	-0.229641	-0.233732	-0.237588	-0.241205	-0.244578	-0.247705	-0.250583	-0.253209	-0.255579	-0.257692	-0.259546	-0.261139	-0.262468	-0.263533	-0.264333	-0.264867	-0.265134
-1.43649e-17	-0.00744326	-0.014879	-0.0222998	-0.0296981	-0.0370666	-0.0443977	-0.0516841	-0.0589184	-0.0660935	-0.073202	-0.0802367	-0.0871907	-0.0940569	-0.100828	-0.107498	-0.11406	-0.120507	-0.126832	-0.13303	-0.139094	-0.145018	-0.150796	-0.156422	-0.16189	-0.167196	-0.172333	-0.177296	-0.182081	-0.186683	-0.191097	-0.195318	-0.199343	-0.203167	-0.206786	-0.210197	-0.213396	-0.216381	-0.219148	-0.221694	-0.224017	-0.226114	-0.227984	-0.229624	-0.231032	-0.232209	-0.233151	-0.233859	-0.234331	-0.234567
-1.24787e-17	-0.0064659	-0.0129253	-0.0193717	-0.0257985	-0.0321994	-0.0385679	-0.0448975	-0.051182	-0.0574148	-0.0635899	-0.069701	-0.0757418	-0.0817064	-0.0875888	-0.0933829	-0.099083	-0.104683	-0.110178	-0.115562	-0.12083	-0.125976	-0.130995	-0.135882	-0.140633	-0.145241	-0.149704	-0.154016	-0.158172	-0.16217	-0.166004	-0.169671	-0.173167	-0.176489	-0.179633	-0.182596	-0.185376	-0.187968	-0.190372	-0.192584	-0.194601	-0.196423	-0.198047	-0.199472	-0.200696	-0.201718	-0.202536	-0.203151	-0.203561	-0.203766
-1.058e-17	-0.00548209	-0.0109587	-0.0164242	-0.0218732	-0.0273002	-0.0326997	-0.0380662	-0.0433945	-0.048679	-0.0539145	-0.0590957	-0.0642175	-0.0692745	-0.0742618	-0.0791744	-0.0840072	-0.0887554	-0.0934143	-0.0979791	-0.102445	-0.106808	-0.111064	-0.115207	-0.119235	-0.123142	-0.126926	-0.130582	-0.134106	-0.137495	-0.140746	-0.143855	-0.146819	-0.149636	-0.152301	-0.154814	-0.15717	-0.159368	-0.161406	-0.163281	-0.164992	-0.166537	-0.167914	-0.169122	-0.170159	-0.171026	-0.17172	-0.172241	-0.172589	-0.172763
-8.67078e-18	-0.00449282	-0.00898111	-0.0134604	-0.0179261	-0.0223737	-0.0267988	-0.031197	-0.0355637	-0.0398946	-0.0441853	-0.0484316	-0.0526291	-0.0567736	-0.0608609	-0.0648869	-0.0688477	-0.072739	-0.0765572	-0.0802982	-0.0839584	-0.0875341	-0.0910216	-0.0944175	-0.0977183	-0.100921	-0.104022	-0.107018	-0.109906	-0.112683	-0.115348	-0.117896	-0.120325	-0.122633	-0.124818	-0.126877	-0.128808	-0.13061	-0.13228	-0.133816	-0.135218	-0.136484	-0.137613	-0.138603	-0.139453	-0.140163	-0.140732	-0.141159	-0.141444	-0.141587
-6.75292e-18	-0.00349907	-0.00699461	-0.0104831	-0.0139611	-0.0174249	-0.0208713	-0.0242966	-0.0276975	-0.0310705	-0.0344121	-0.0377192	-0.0409882	-0.044216	-0.0473993	-0.0505348	-0.0536195	-0.0566501	-0.0596238	-0.0625373	-0.065388	-0.0681727	-0.0708889	-0.0735336	-0.0761043	-0.0785984	-0.0810133	-0.0833467	-0.0855961	-0.0877594	-0.0898343	-0.0918187	-0.0937107	-0.0955083	-0.0972098	-0.0988133	-0.100317	-0.10172	-0.103021	-0.104218	-0.10531	-0.106296	-0.107175	-0.107946	-0.108608	-0.109161	-0.109604	-0.109937	-0.110159	-0.11027
-4.82833e-18	-0.00250183	-0.00500114	-0.00749541	-0.00998214	-0.0124588	-0.0149229	-0.017372	-0.0198037	-0.0222153	-0.0246046	-0.0269692	-0.0293065	-0.0316144	-0.0338904	-0.0361323	-0.0383379	-0.0405048	-0.0426309	-0.0447141	-0.0467523	-0.0487434	-0.0506854	-0.0525764	-0.0544145	-0.0561977	-0.0579244	-0.0595928	-0.0612011	-0.0627478	-0.0642314	-0.0656503	-0.067003	-0.0682883	-0.0695048	-0.0706514	-0.0717268	-0.07273	-0.0736599	-0.0745157	-0.0752965	-0.0760014	-0.0766298	-0.0771811	-0.0776546	-0.0780499	-0.0783667	-0.0786045	-0.0787632	-0.0788426
-2.89892e-18	-0.0015021	-0.00300268	-0.00450024	-0.00599327	-0.00748026	-0.00895972	-0.0104302	-0.0118901	-0.0133381	-0.0147726	-0.0161923	-0.0175956	-0.0189813	-0.0203478	-0.0216938	-0.023018	-0.024319	-0.0255956	-0.0268463	-0.02807	-0.0292655	-0.0304315	-0.0315668	-0.0326704	-0.0337411	-0.0347778	-0.0357794	-0.0367451	-0.0376737	-0.0385645	-0.0394163	-0.0402285	-0.0410002	-0.0417306	-0.042419	-0.0430647	-0.043667	-0.0442254	-0.0447392	-0.0452079	-0.0456312	-0.0460085	-0.0463394	-0.0466237	-0.0468611	-0.0470513	-0.0471941	-0.0472894	-0.047337
-9.66629e-19	-0.000500865	-0.00100123	-0.00150058	-0.00199842	-0.00249425	-0.00298757	-0.00347788	-0.00396468	-0.0044475	-0.00492584	-0.00539921	-0.00586715	-0.00632919	-0.00678485	-0.00723367	-0.00767522	-0.00810904	-0.00853469	-0.00895174	-0.00935979	-0.00975841	-0.0101472	-0.0105258	-0.0108938	-0.0112508	-0.0115964	-0.0119304	-0.0122524	-0.0125621	-0.0128591	-0.0131431	-0.013414	-0.0136713	-0.0139148	-0.0141444	-0.0143597	-0.0145605	-0.0147467	-0.014918	-0.0150743	-0.0152154	-0.0153413	-0.0154516	-0.0155464	-0.0156256	-0.015689	-0.0157366	-0.0157684	-0.0157843
9.66629e-19	0.000500865	0.00100123	0.00150058	0.00199842	0.00249425	0.00298757	0.00347788	0.00396468	0.0044475	0.00492584	0.00539921	0.00586715	0.00632919	0.00678485	0.00723367	0.00767522	0.00810904	0.00853469	0.00895174	0.00935979	0.00975841	0.0101472	0.0105258	0.0108938	0.0112508	0.0115964	0.0119304	0.0122524	0.0125621	0.0128591	0.0131431	0.013414	0.0136713	0.0139148	0.0141444	0.0143597	0.0145605	0.0147467	0.014918	0.0150743	0.0152154	0.0153413	0.0154516	0.0155464	0.0156256	0.015689	0.0157366	0.0157684	0.0157843
2.89892e-18	0.0015021	0.00300268	0.00450024	0.00599327	0.00748026	0.00895972	0.0104302	0.0118901	0.0133381	0.0147726	0.0161923	0.0175956	0.0189813	0.0203478	0.0216938	0.023018	0.024319	0.0255956	0.0268463	0.02807	0.0292655	0.0304315	0.0315668	0.0326704	0.0337411	0.0347778	0.0357794	0.0367451	0.0376737	0.0385645	0.0394163	0.0402285	0.0410002	0.0417306	0.042419	0.0430647	0.043667	0.0442254	0.0447392	0.0452079	0.0456312	0.0460085	0.0463394	0.0466237	0.0468611	0.0470513	0.0471941	0.0472894	0.047337
4.82833e-18	0.00250183	0.00500114	0.00749541	0.00998214	0.0124588	0.0149229	0.017372	0.0198037	0.0222153	0.0246046	0.0269692	0.0293065	0.0316144	0.0338904	0.0361323	0.0383379	0.0405048	0.0426309	0.0447141	0.0467523	0.0487434	0.0506854	0.0525764	0.0544145	0.0561977	0.0579244	0.0595928	0.0612011	0.0627478	0.0642314	0.0656503	0.067003	0.0682883	0.0695048	0.0706514	0.0717268	0.07273	0.0736599	0.0745157	0.0752965	0.0760014	0.0766298	0.0771811	0.0776546	0.0780499	0.0783667	0.0786045	0.0787632	0.0788426
6.75292e-18	0.00349907	0.00699461	0.0104831	0.0139611	0.0174249	0.0208713	0.0242966	0.0276975	0.0310705	0.0344121	0.0377192	0.0409882	0.044216	0.0473993	0.0505348	0.0536195	0.0566501	0.0596238	0.0625373	0.065388	0.0681727	0.0708889	0.0735336	0.0761043	0.0785984	0.0810133	0.0833467	0.0855961	0.0877594	0.0898343	0.0918187	0.0937107	0.0955083	0.0972098	0.0988133	0.100317	0.10172	0.103021	0.104218	0.10531	0.106296	0.107175	0.107946	0.108608	0.109161	0.109604	0.109937	0.110159	0.11027
8.67078e-18	0.00449282	0.00898111	0.0134604	0.0179261	0.0223737	0.0267988	0.031197	0.0355637	0.0398946	0.0441853	0.0484316	0.0526291	0.0567736	0.0608609	0.0648869	0.0688477	0.072739	0.0765572	0.0802982	0.0839584	0.0875341	0.0910216	0.0944175	0.0977183	0.100921	0.104022	0.107018	0.109906	0.112683	0.115348	0.117896	0.120325	0.122633	0.124818	0.126877	0.128808	0.13061	0.13228	0.133816	0.135218	0.136484	0.137613	0.138603	0.139453	0.140163	0.140732	0.141159	0.141444	0.141587
1.058e-17	0.00548209	0.0109587	0.0164242	0.0218732	0.0273002	0.0326997	0.0380662	0.0433945	0.048679	0.0539145	0.0590957	0.0642175	0.0692745	0.0742618	0.0791744	0.0840072	0.0887554	0.0934143	0.0979791	0.102445	0.106808	0.111064	0.115207	0.119235	0.123142	0.126926	0.130582	0.134106	0.137495	0.140746	0.143855	0.146819	0.149636	0.152301	0.154814	0.15717	0.159368	0.161406	0.163281	0.164992	0.166537	0.167914	0.169122	0.170159	0.171026	0.17172	0.172241	0.172589	0.172763
1.24787e-17	0.0064659	0.0129253	0.0193717	0.0257985	0.0321994	0.0385679	0.0448975	0.051182	0.0574148	0.0635899	0.069701	0.0757418	0.0817064	0.0875888	0.0933829	0.099083	0.104683	0.110178	0.115562	0.12083	0.125976	0.130995	0.135882	0.140633	0.145241	0.149704	0.154016	0.158172	0.16217	0.166004	0.169671	0.173167	0.176489	0.179633	0.182596	0.185376	0.187968	0.190372	0.192584	0.194601	0.196423	0.198047	0.199472	0.200696	0.201718	0.202536	0.203151	0.203561	0.203766
1.43649e-17	0.00744326	0.014879	0.0222998	0.0296981	0.0370666	0.0443977	0.0516841	0.0589184	0.0660935	0.073202	0.0802367	0.0871907	0.0940569	0.100828	0.107498	0.11406	0.120507	0.126832	0.13303	0.139094	0.145018	0.150796	0.156422	0.16189	0.167196	0.172333	0.177296	0.182081	0.186683	0.191097	0.195318	0.199343	0.203167	0.206786	0.210197	0.213396	0.216381	0.219148	0.221694	0.224017	0.226114	0.227984	0.229624	0.231032	0.232209	0.233151	0.233859	0.234331	0.234567
1.62368e-17	0.00841321	0.0168179	0.0252057	0.0335682	0.0418968	0.0501832	0.0584191	0.0665962	0.0747062	0.082741	0.0906925	0.0985527	0.106314	0.113967	0.121507	0.128923	0.13621	0.14336	0.150366	0.15722	0.163915	0.170446	0.176805	0.182986	0.188983	0.19479	0.2004	0.205809	0.21101	0.215999	0.22077	0.225319	0.229641	0.233732	0.237588	0.241205	0.244578	0.247705	0.250583	0.253209	0.255579	0.257692	0.259546	0.261139	0.262468	0.263533	0.264333	0.264867	0.265134
1.80925e-17	0.00937476	0.0187401	0.0280865	0.0374047	0.0466852	0.0559187	0.0650959	0.0742076	0.0832445	0.0921976	0.101058	0.109816	0.118464	0.126993	0.135394	0.143658	0.151778	0.159745	0.167551	0.175189	0.18265	0.189927	0.197013	0.2039	0.210582	0.217052	0.223304	0.229331	0.235126	0.240686	0.246002	0.251071	0.255888	0.260446	0.264742	0.268772	0.272531	0.276016	0.279223	0.282148	0.28479	0.287145	0.28921	0.290985	0.292466	0.293653	0.294544	0.295139	0.295436
1.99302e-17	0.010327	0.0206435	0.0309393	0.041204	0.0514271	0.0615985	0.0717078	0.081745	0.0916998	0.101562	0.111323	0.120971	0.130497	0.139892	0.149146	0.15825	0.167194	0.175971	0.18457	0.192983	0.201202	0.209218	0.217023	0.224611	0.231971	0.239099	0.245985	0.252624	0.259009	0.265132	0.270989	0.276573	0.281878	0.2869	0.291633	0.296072	0.300213	0.304051	0.307584	0.310807	0.313716	0.31631	0.318586	0.32054	0.322172	0.32348	0.324462	0.325117	0.325444
2.1748e-17	0.0112689	0.0225264	0.0337613	0.0449622	0.0561178	0.0672168	0.0782483	0.0892009	0.100064	0.110826	0.121476	0.132004	0.1424	0.152651	0.162749	0.172684	0.182444	0.192021	0.201404	0.210585	0.219553	0.228301	0.236818	0.245097	0.253129	0.260907	0.268422	0.275666	0.282633	0.289315	0.295706	0.301799	0.307588	0.313068	0.318232	0.323076	0.327595	0.331784	0.335638	0.339155	0.34233	0.345161	0.347644	0.349777	0.351557	0.352984	0.354055	0.35477	0.355128
2.35442e-17	0.0121996	0.0243869	0.0365496	0.0486755	0.0607525	0.0727682	0.0847107	0.0965679	0.108328	0.119979	0.131509	0.142906	0.15416	0.165259	0.176191	0.186945	0.197512	0.20788	0.218038	0.227977	0.237686	0.247156	0.256377	0.265339	0.274035	0.282455	0.29059	0.298433	0.305975	0.313209	0.320128	0.326724	0.332992	0.338924	0.344515	0.349759	0.354651	0.359185	0.363358	0.367165	0.370603	0.373667	0.376355	0.378664	0.380592	0.382137	0.383296	0.38407	0.384457
2.53169e-17	0.0131181	0.026223	0.0393015	0.0523404	0.0653266	0.078247	0.0910887	0.103839	0.116484	0.129012	0.14141	0.153666	0.165767	0.177701	0.189456	0.201021	0.212383	0.223531	0.234454	0.245141	0.255581	0.265764	0.27568	0.285317	0.294668	0.303721	0.312469	0.320902	0.329012	0.336791	0.344231	0.351324	0.358063	0.364442	0.370454	0.376093	0.381353	0.386229	0.390716	0.39481	0.398506	0.401801	0.404692	0.407175	0.409247	0.410908	0.412155	0.412988	0.413404
2.70643e-17	0.0140235	0.028033	0.0420142	0.0559531	0.0698356	0.0836479	0.0973759	0.111006	0.124524	0.137917	0.151171	0.164272	0.177209	0.189967	0.202533	0.214896	0.227042	0.23896	0.250637	0.262062	0.273222	0.284108	0.294708	0.305011	0.315006	0.324685	0.334037	0.343052	0.351722	0.360037	0.367991	0.375573	0.382778	0.389597	0.396024	0.402052	0.407675	0.412887	0.417684	0.422061	0.426012	0.429535	0.432625	0.435279	0.437495	0.43927	0.440604	0.441493	0.441938
2.87848e-17	0.014915	0.029815	0.044685	0.05951	0.074275	0.0889653	0.103566	0.118062	0.13244	0.146684	0.160781	0.174715	0.188474	0.202043	0.215408	0.228557	0.241475	0.25415	0.26657	0.278721	0.290591	0.302169	0.313442	0.3244	0.335031	0.345325	0.355271	0.364859	0.37408	0.382925	0.391384	0.399448	0.407111	0.414363	0.421199	0.42761	0.43359	0.439134	0.444236	0.448891	0.453093	0.45684	0.460126	0.462949	0.465306	0.467194	0.468612	0.469559	0.470032
3.04765e-17	0.0157916	0.0315673	0.0473113	0.0630075	0.0786404	0.0941941	0.109653	0.125001	0.140224	0.155305	0.17023	0.184984	0.199551	0.213917	0.228068	0.24199	0.255667	0.269088	0.282237	0.295102	0.30767	0.319928	0.331864	0.343466	0.354722	0.365621	0.376151	0.386303	0.396066	0.40543	0.414386	0.422925	0.431038	0.438717	0.445954	0.452742	0.459074	0.464944	0.470345	0.475274	0.479723	0.48369	0.487169	0.490158	0.492654	0.494653	0.496154	0.497156	0.497657
3.21379e-17	0.0166525	0.0332882	0.0498904	0.0664423	0.0829274	0.0993289	0.11563	0.131816	0.147868	0.163771	0.17951	0.195068	0.210429	0.225579	0.240501	0.255181	0.269605	0.283757	0.297623	0.311189	0.324442	0.337368	0.349955	0.362189	0.374059	0.385552	0.396657	0.407362	0.417657	0.427532	0.436976	0.44598	0.454535	0.462633	0.470264	0.477422	0.4841	0.49029	0.495986	0.501183	0.505875	0.510057	0.513727	0.516878	0.51951	0.521618	0.523201	0.524258	0.524786
3.37673e-17	0.0174967	0.0349759	0.0524197	0.0698109	0.0871317	0.104365	0.121493	0.138498	0.155365	0.172074	0.188611	0.204958	0.221098	0.237015	0.252694	0.268119	0.283273	0.298143	0.312712	0.326966	0.340891	0.354473	0.367697	0.380552	0.393023	0.405099	0.416767	0.428015	0.438832	0.449207	0.45913	0.468591	0.47758	0.486088	0.494106	0.501627	0.508643	0.515147	0.521132	0.526592	0.531522	0.535917	0.539772	0.543084	0.545848	0.548064	0.549727	0.550837	0.551392
3.5363e-17	0.0183236	0.0366287	0.0548969	0.0731098	0.0912491	0.109297	0.127234	0.145043	0.162707	0.180206	0.197524	0.214643	0.231546	0.248216	0.264636	0.280789	0.29666	0.312232	0.327489	0.342417	0.357	0.371223	0.385073	0.398535	0.411596	0.424242	0.436461	0.448241	0.459569	0.470435	0.480827	0.490734	0.500148	0.509058	0.517455	0.525332	0.532679	0.53949	0.545758	0.551476	0.556639	0.561242	0.565279	0.568747	0.571643	0.573963	0.575705	0.576867	0.577448
3.69234e-17	0.0191321	0.0382449	0.0573193	0.0763359	0.0952756	0.114119	0.132848	0.151444	0.169886	0.188158	0.20624	0.224114	0.241763	0.259169	0.276313	0.293179	0.30975	0.326009	0.34194	0.357527	0.372753	0.387604	0.402065	0.416121	0.429758	0.442963	0.455721	0.46802	0.479848	0.491193	0.502044	0.512389	0.522218	0.531521	0.540289	0.548513	0.556184	0.563296	0.56984	0.575811	0.581202	0.586007	0.590223	0.593844	0.596867	0.59929	0.601109	0.602322	0.602929
3.8447e-17	0.0199216	0.0398231	0.0596845	0.0794859	0.0992072	0.118829	0.13833	0.157693	0.176896	0.195922	0.21475	0.233362	0.251739	0.269863	0.287715	0.305277	0.322532	0.339462	0.35605	0.37228	0.388135	0.403599	0.418656	0.433292	0.447492	0.461241	0.474526	0.487333	0.499649	0.511462	0.522761	0.533532	0.543767	0.553454	0.562584	0.571147	0.579135	0.58654	0.593355	0.599572	0.605185	0.610189	0.614578	0.618349	0.621497	0.624019	0.625913	0.627177	0.627809
3.99324e-17	0.0206912	0.0413616	0.0619903	0.0825566	0.10304	0.123419	0.143674	0.163785	0.18373	0.203491	0.223047	0.242378	0.261465	0.280289	0.29883	0.317071	0.334992	0.352576	0.369805	0.386662	0.403129	0.419191	0.43483	0.450032	0.46478	0.47906	0.492858	0.50616	0.518952	0.531222	0.542956	0.554144	0.564774	0.574835	0.584318	0.593212	0.601509	0.6092	0.616278	0.622735	0.628565	0.633762	0.638321	0.642237	0.645507	0.648127	0.650094	0.651406	0.652063
4.13779e-17	0.0214402	0.0428588	0.0642343	0.0855451	0.10677	0.127887	0.148875	0.169714	0.190381	0.210857	0.231121	0.251152	0.27093	0.290435	0.309647	0.328548	0.347118	0.365339	0.383192	0.400659	0.417722	0.434365	0.45057	0.466322	0.481604	0.496402	0.510699	0.524482	0.537738	0.550451	0.562611	0.574204	0.585218	0.595644	0.605469	0.614686	0.623283	0.631252	0.638586	0.645277	0.651318	0.656703	0.661428	0.665486	0.668874	0.671588	0.673626	0.674986	0.675667
4.27821e-17	0.0221678	0.0443134	0.0664142	0.0884483	0.110393	0.132227	0.153928	0.175473	0.196842	0.218013	0.238964	0.259675	0.280124	0.300291	0.320156	0.339698	0.358899	0.377738	0.396196	0.414256	0.431899	0.449106	0.465862	0.482148	0.497949	0.513248	0.528031	0.542282	0.555987	0.569132	0.581704	0.593691	0.605079	0.615858	0.626018	0.635546	0.644435	0.652675	0.660258	0.667176	0.673422	0.67899	0.683875	0.688071	0.691574	0.69438	0.696488	0.697894	0.698597
[truncated: 475 more rows]
[truncated: 50 more columns]
