# Supplementary material for: Microscopic structural study on the growth history of granular heaps prepared by the raining method
Source: Royal Society of Chemistry journal article supplement (doi:10.1039/d5sm00506j), 2025-01-01
Supplement: d5sm00506j2.pdf [file d5sm00506j2.pdf]

**Supplemental Information for:**  
**Microscopic Structural Study on the Growth History of Granular**  
**Heaps Prepared by the Raining Method**

Hanyu Li,<sup>1</sup> Houfei Yuan,<sup>3</sup> Zhikun Zeng,<sup>3</sup> Shuyang Zhang,<sup>3</sup> Chijin Zhou,<sup>1</sup> Xinyu Ai,<sup>1</sup> and  
Yujie Wang<sup>1,2,3,\*</sup>

<sup>1</sup>*Department of Physics, College of Mathematics and Physics, Chengdu University of Technology,  
Chengdu 610059, China*

<sup>2</sup>*State Key Laboratory of Geohazard Prevention and Geoenvironment Protection, Chengdu  
University of Technology, Chengdu 610059, China*

<sup>3</sup>*School of Physics and Astronomy, Shanghai Jiao Tong University, Shanghai 200240, China*

Corresponding author.

\*yujiewang@sjtu.edu.cn

**Supplementary Note 1: Coarse-grain processing**

In order to determine the appropriate coarse-graining scale for our structural analysis, we systematically tested multiple smoothing lengths, specifically  $0.5d$ ,  $1d$ , and  $2d$ , where  $d$  is the particle diameter. As shown in Fig. S1, the overall spatial trends of packing fraction  $\phi$  remain consistent across all tested scales, although finer details vary slightly. This consistency confirms that the key conclusions of our work are robust with respect to the choice of coarse-graining scale. We ultimately selected a smoothing length of  $1d$  in the present analysis, as it provides the best balance between preserving meaningful spatial variations and ensuring sufficient particle representation within each averaging cell for statistically reliable measurements.

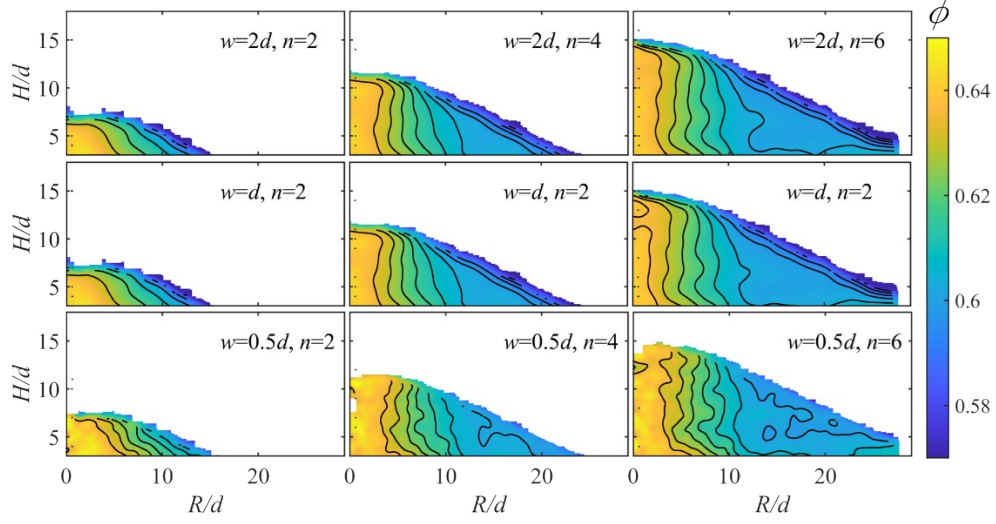

**Fig. S1.** Spatial distributions of  $\phi$  as a function of radial distance  $R$  and height  $H$  for different deposition numbers  $n$  and various smoothing lengths.

### Supplementary Note 2: Determination of particle contact

Ideally, the surface-to-surface distance between two particles in actual contact should be zero. However, due to experimental uncertainties, such as limited X-ray spatial resolution, particle non-sphericity, and image processing artifacts, contacts may be misidentified as small gaps or even overlaps. Consequently, the probability distribution of surface-to-surface distances  $\Delta r$  (Fig. S2a) shows a Gaussian core (red curve) arising from measurement uncertainties among true contacts, and a fat tail reflecting the contribution of nearby but non-contacting particles. To address this, we apply a well-established method that fits the entire distance distribution to separate these two contributions<sup>1</sup>. Specifically, we consider two particles to be in contact if their surface-to-surface distance is smaller than a threshold  $\delta$ . In practice, we plot the average contact number  $Z$  versus  $\delta$  (blue symbols in Fig. S2b), which corresponds to the cumulative behavior of the PDF of  $\Delta r$  in Fig. R1a. This cumulative curve is modeled by a combination of an error function representing true contacts (yellow curve) and a linear term for

non-contacting neighbors (purple line). By fitting the experimental data with this composite model (red curve), we determine the appropriate threshold  $\delta_c$ , below which particles are considered to be in contact.

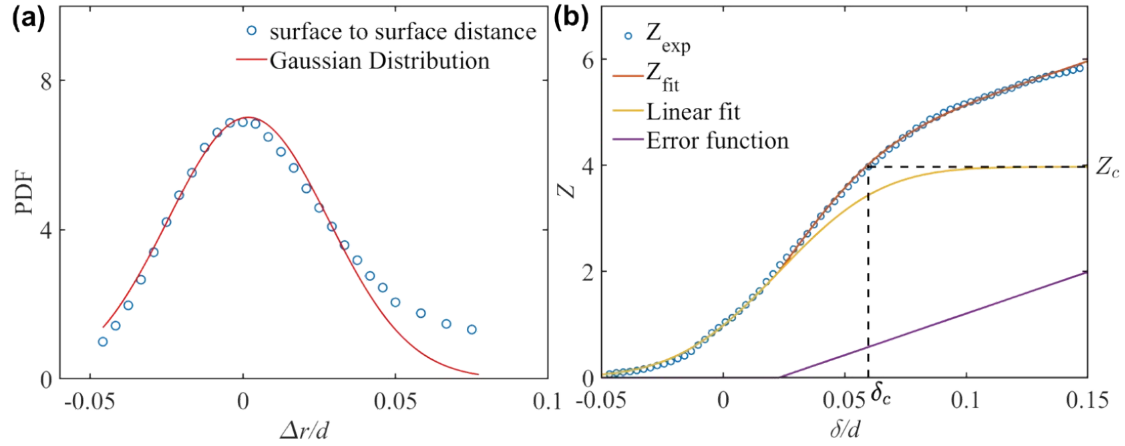

**Fig. S2. a** PDF of surface-to-surface distance  $\Delta r$  among neighboring particles. The Gaussian core results from experimental uncertainties on contacting particles, while the fat right tail stems from the neighboring but non-contacting particles. **b** Complementary error function fitting to yield the critical threshold  $\delta_c$  of surface-to-surface distance and the corresponding global average contact number  $Z_c$ .

### Supplementary References

1. Aste, T., Saadatfar, M. & Senden, T.J. Geometrical structure of disordered sphere packings. *Phys. Rev. E* **71**, 061302 (2005).
